# Supplementary material for: Identification of a novel ligand for the ATAD2 bromodomain with selectivity over BRD4 through a fragment growing approach
Source: PubMed Central journal article supplement (PMC6102691; doi:10.1039/c8ob00099a), 2018-02-15

## Supplementary Information

For

### **Identification of a Novel Ligand for the ATAD2 Bromodomain with Selectivity Over BRD4 Through a Fragment Growing Approach.**

Duncan C. Miller, Mathew P. Martin, Santosh Adhikari, Alfie Brennan, Jane a. Endicott, Bernard T. Golding, Ian R. Hardcastle, Amy Heptinstall, Stephen Hobson, Claire Jennings, Lauren Molyneux, Yvonne Ng, Stephen R. Wedge, Martin E. M. Noble, Celine Cano

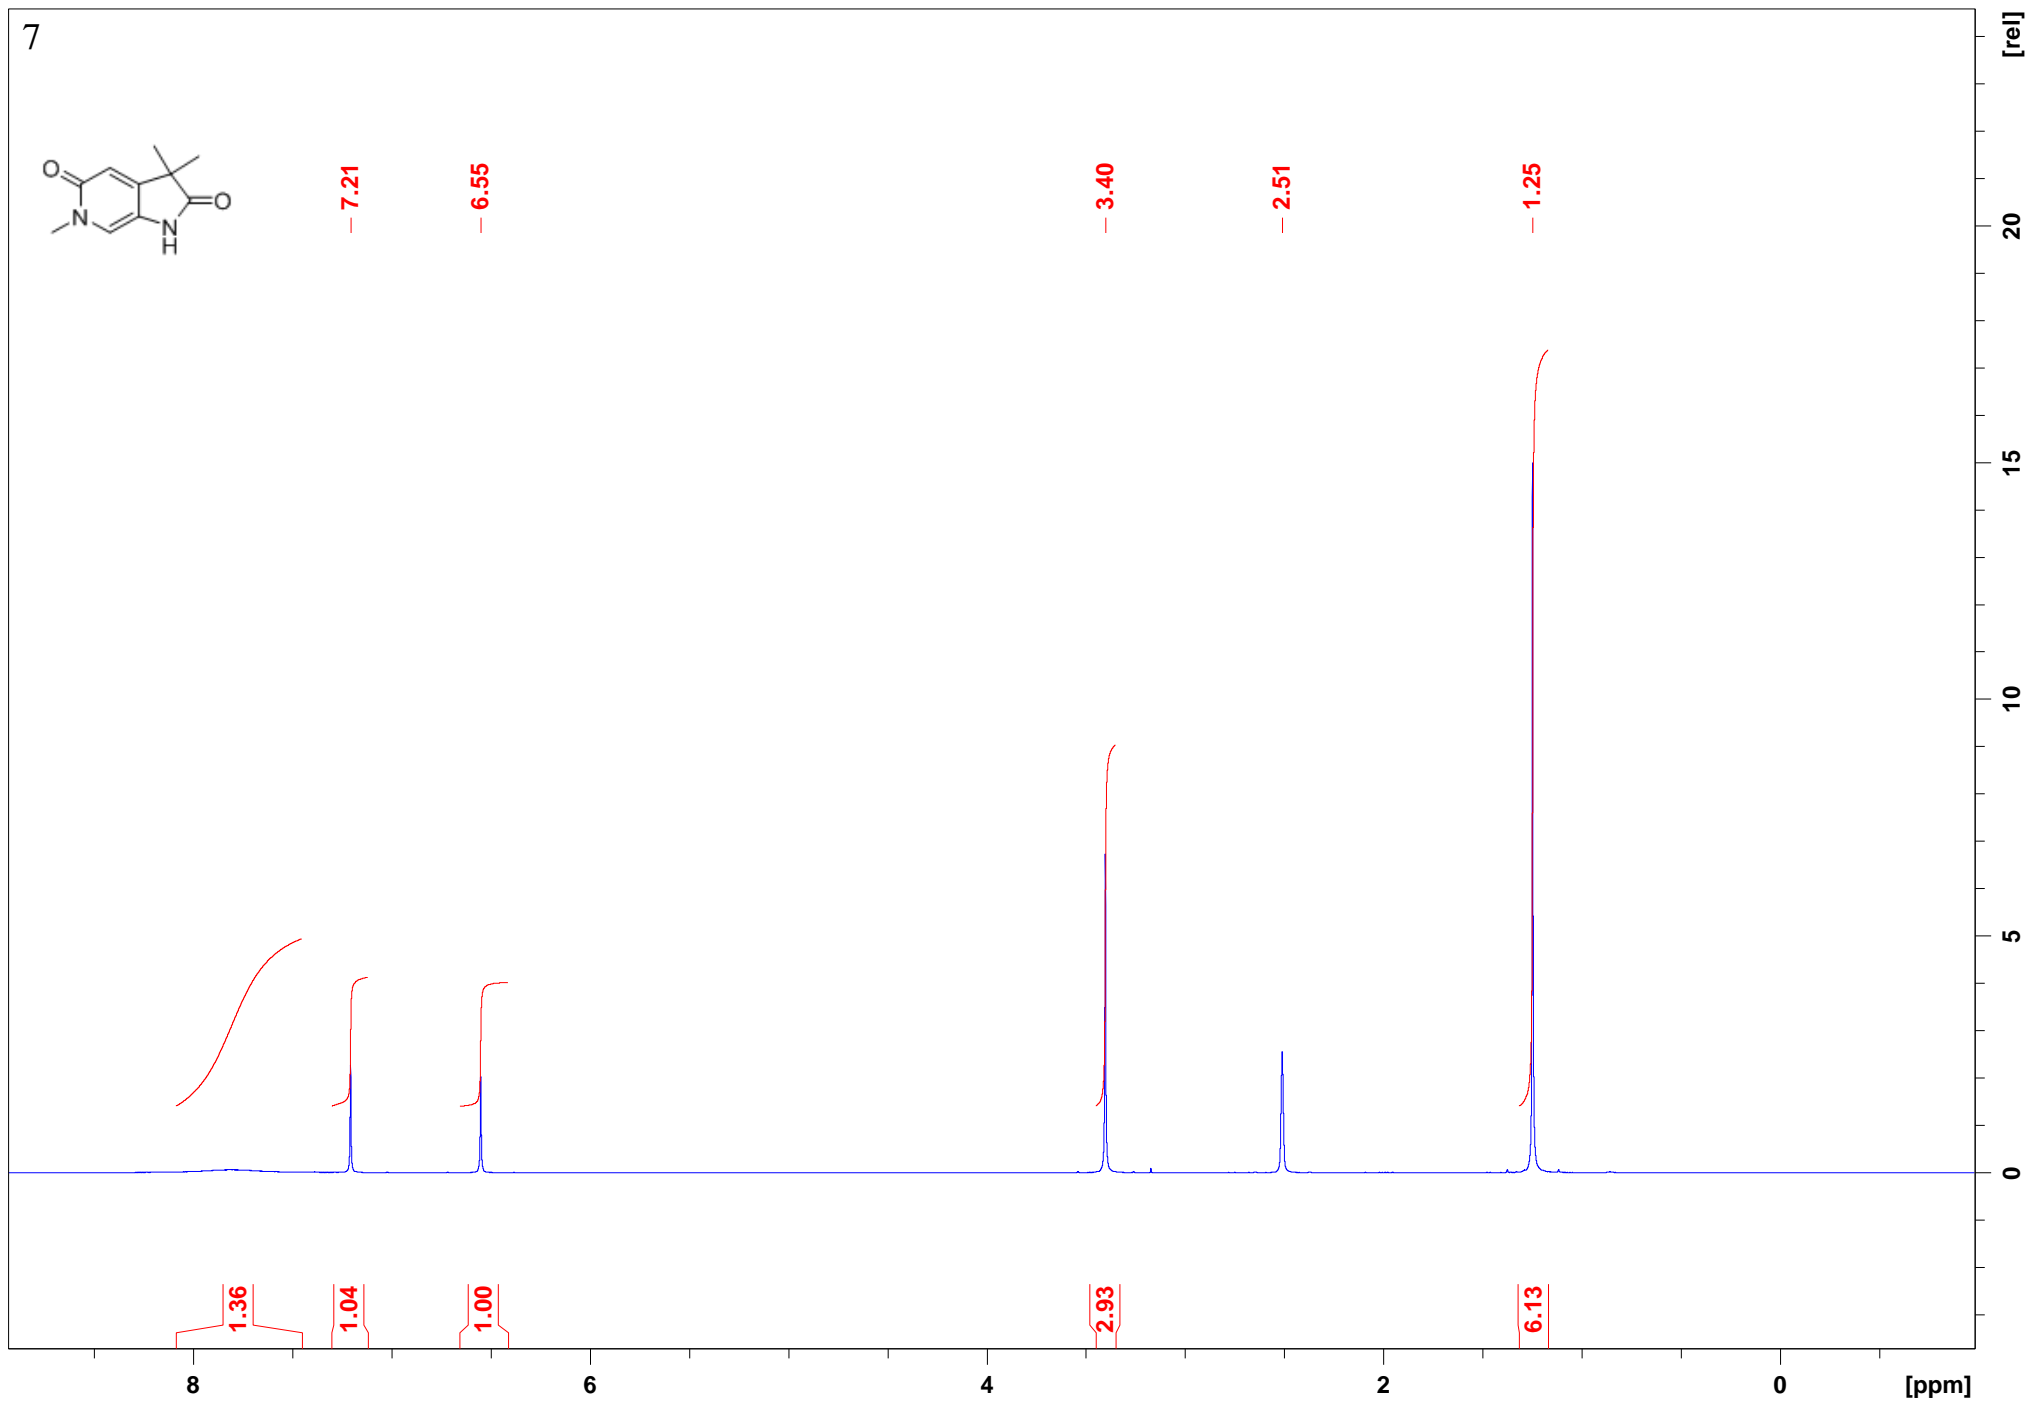

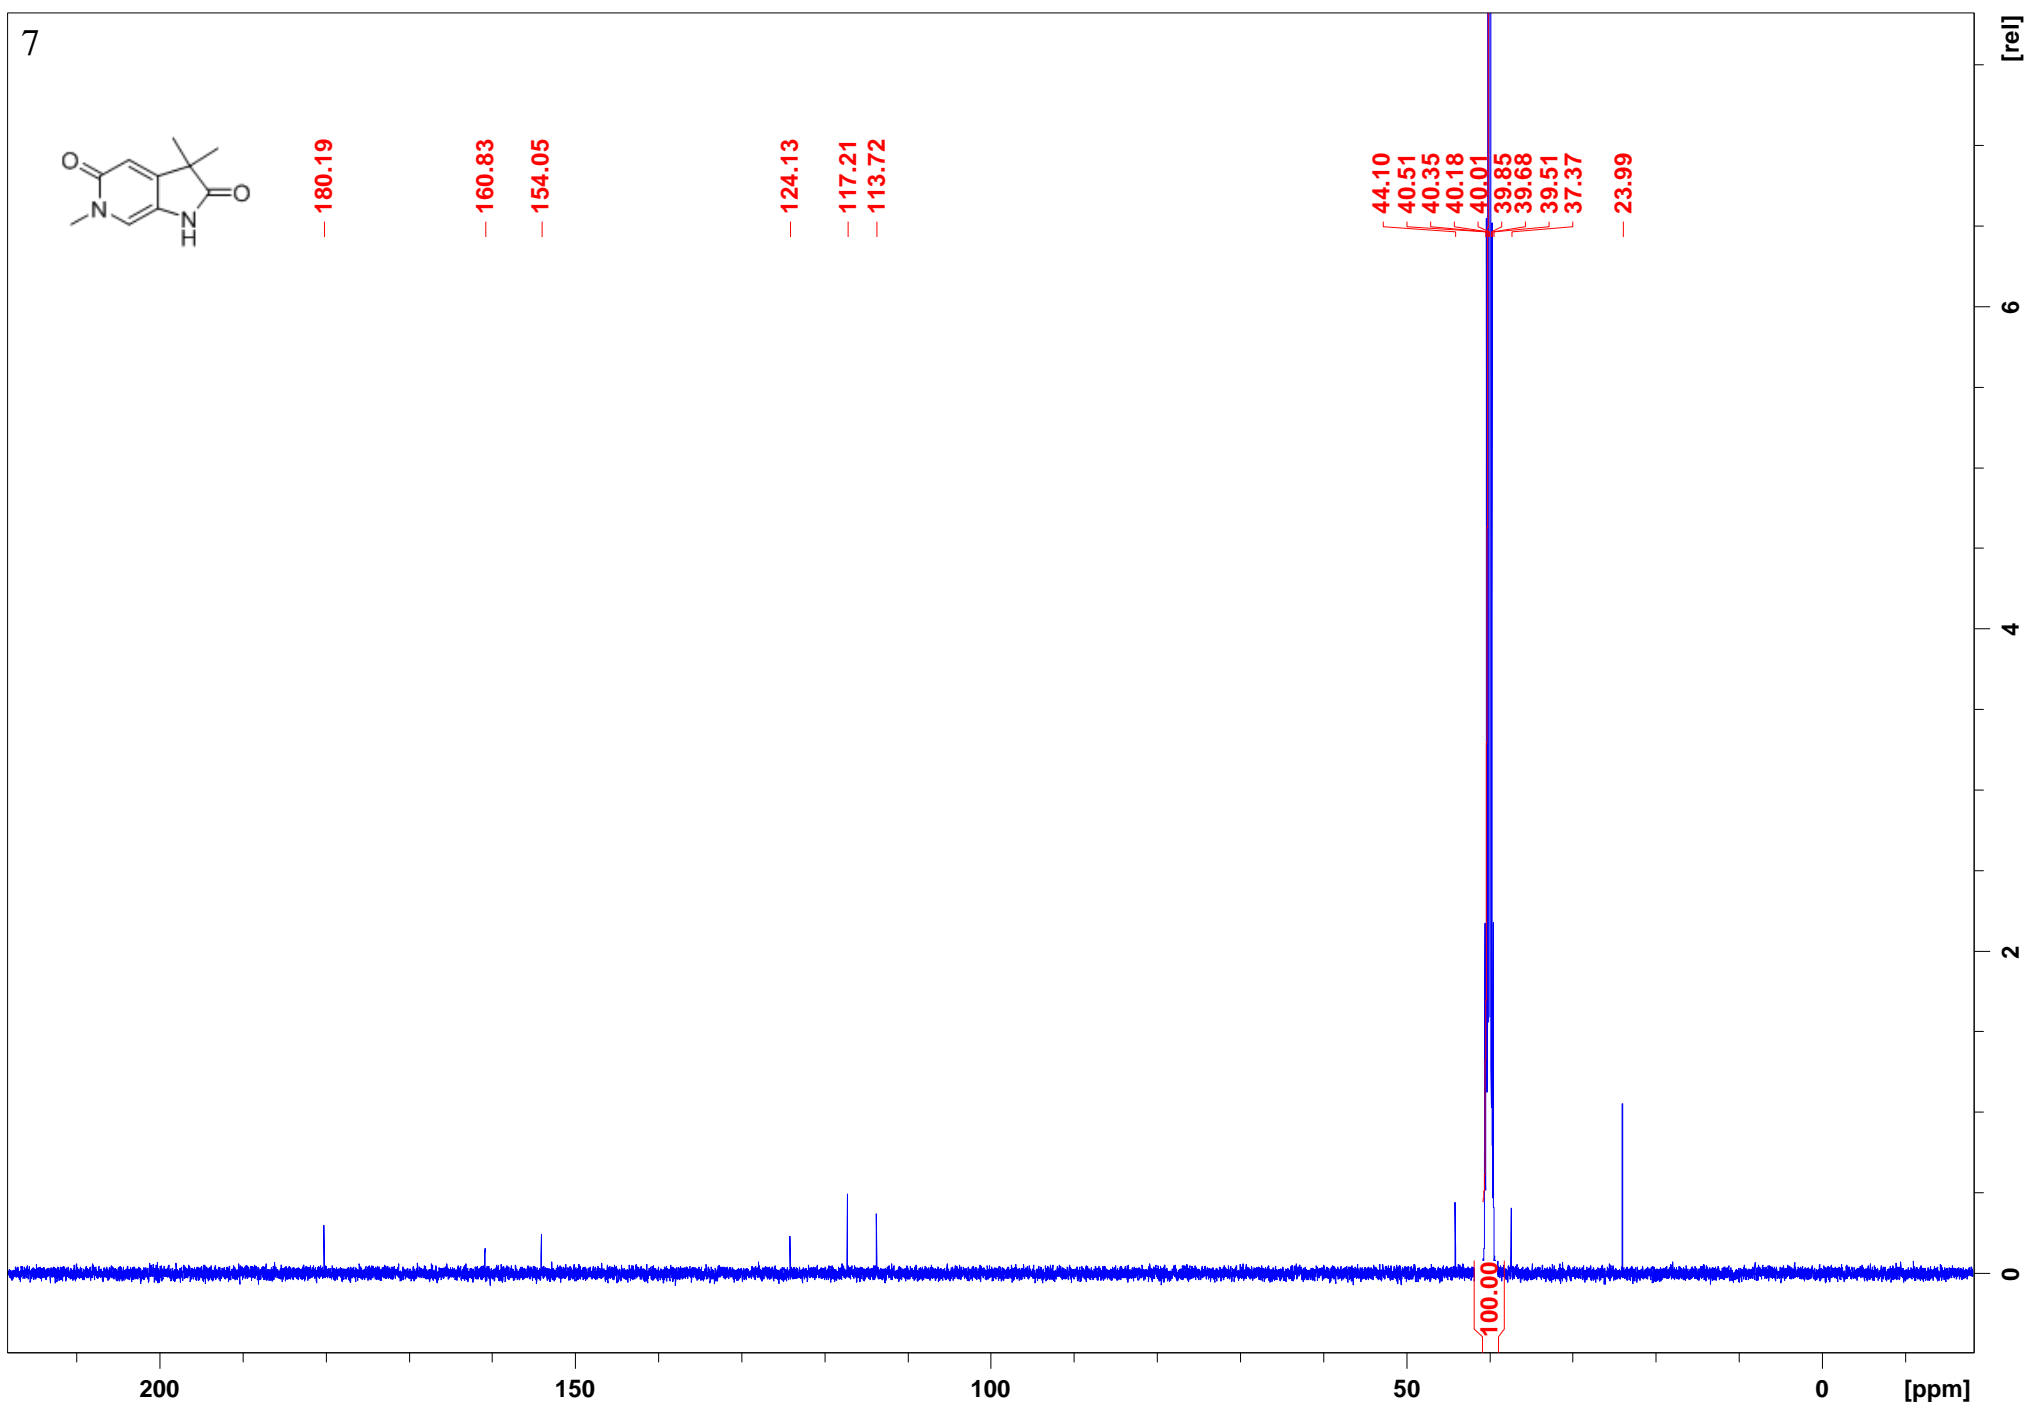

13

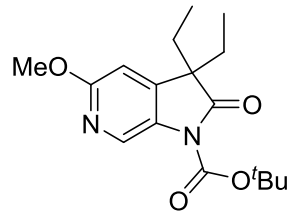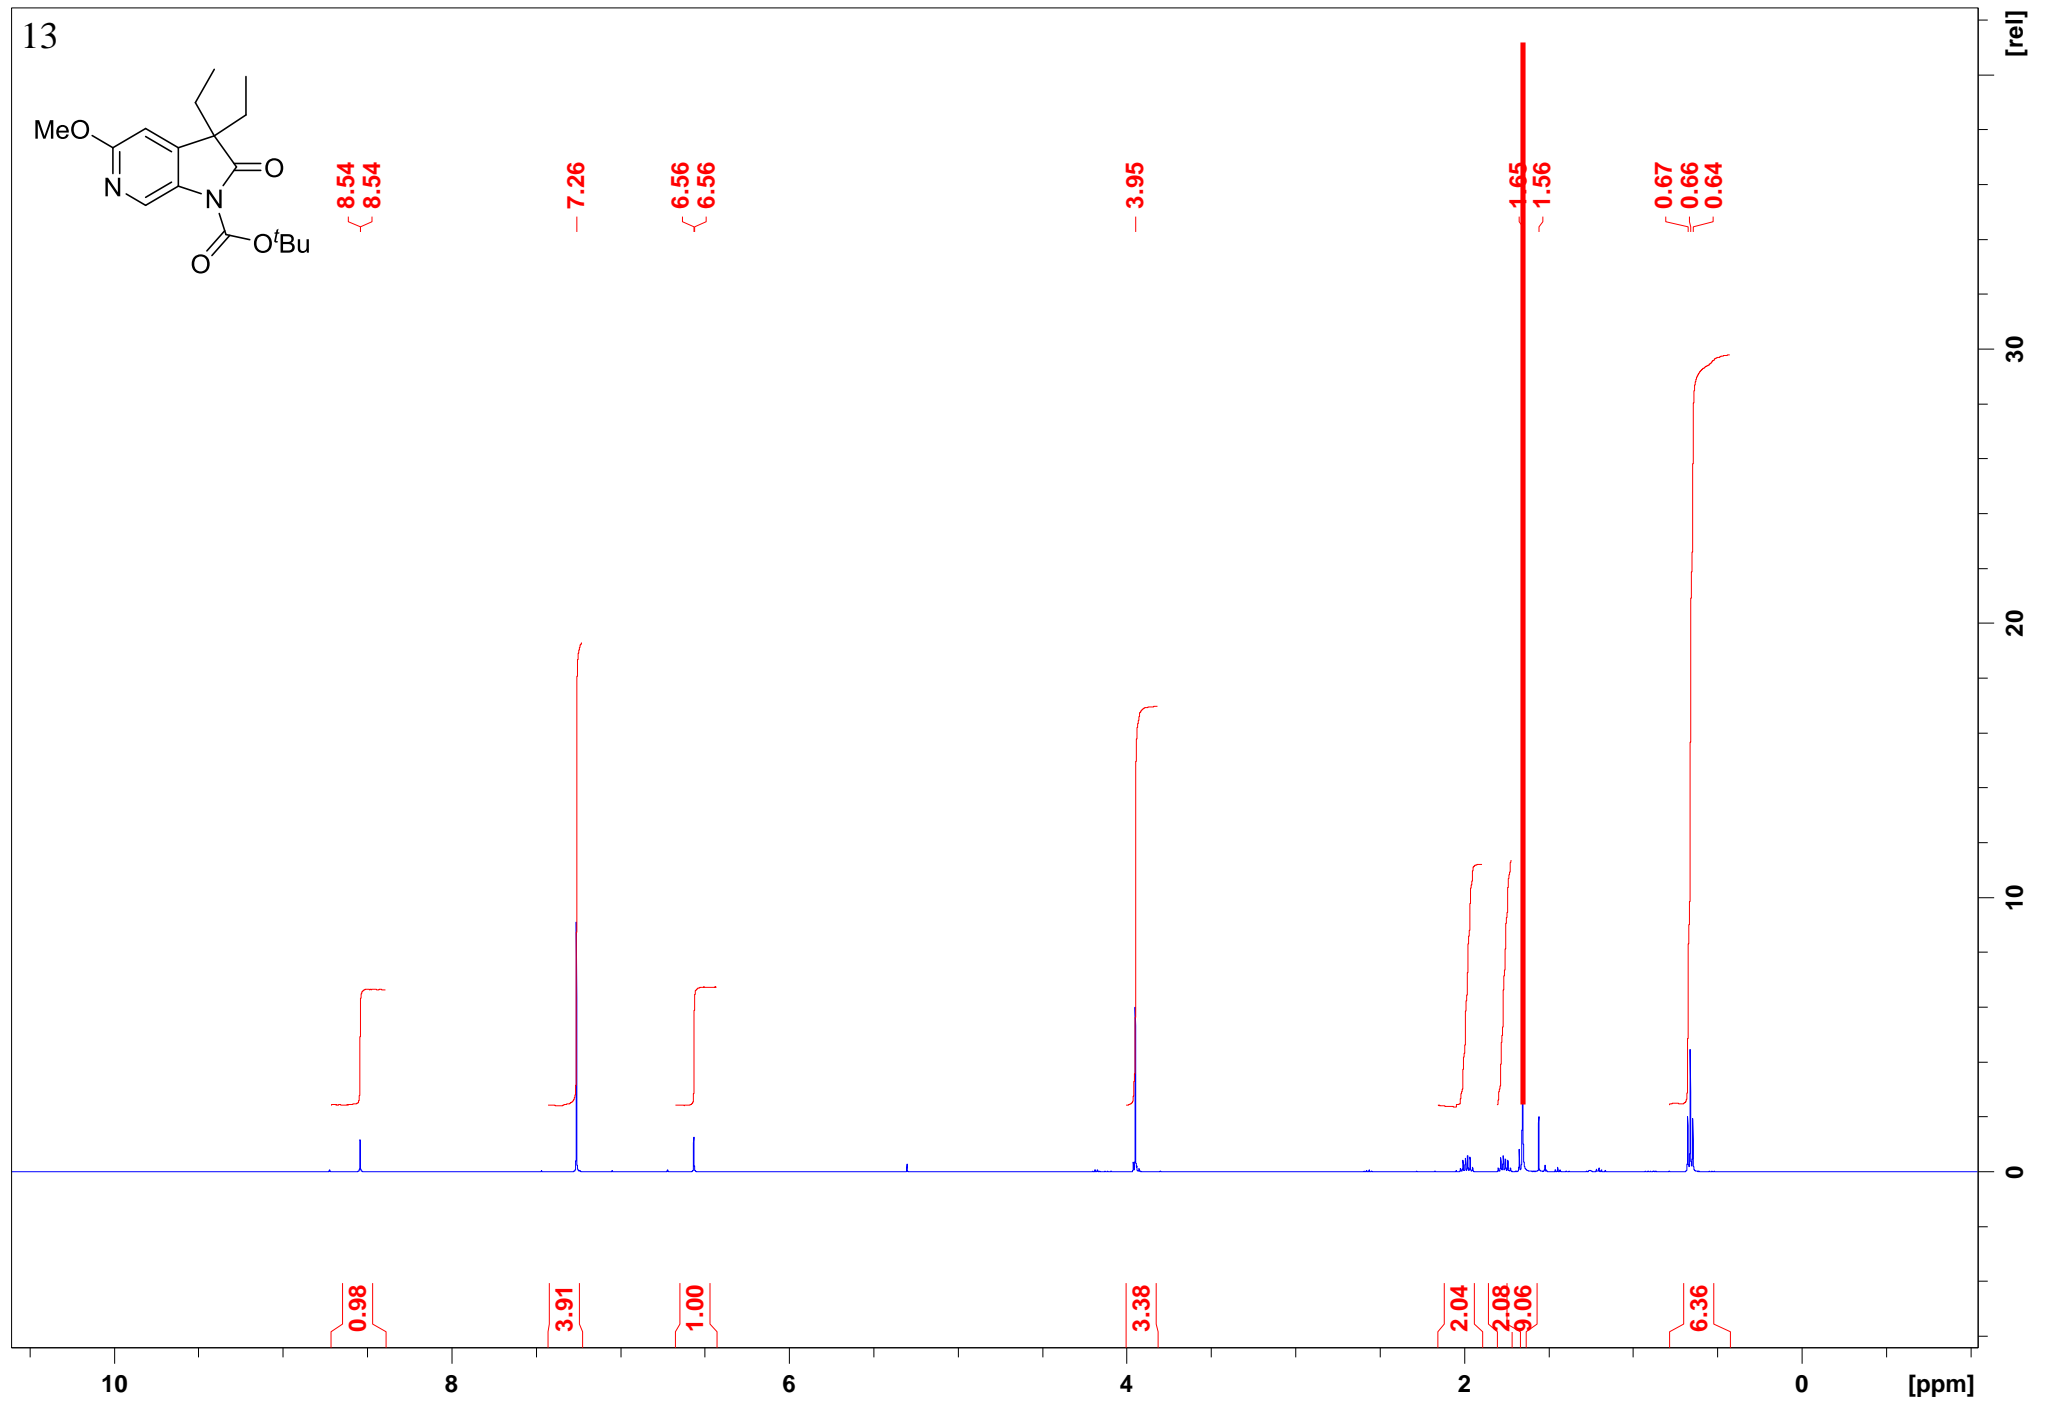

14a

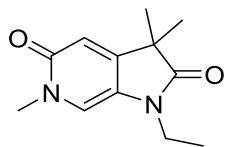

CD3OD

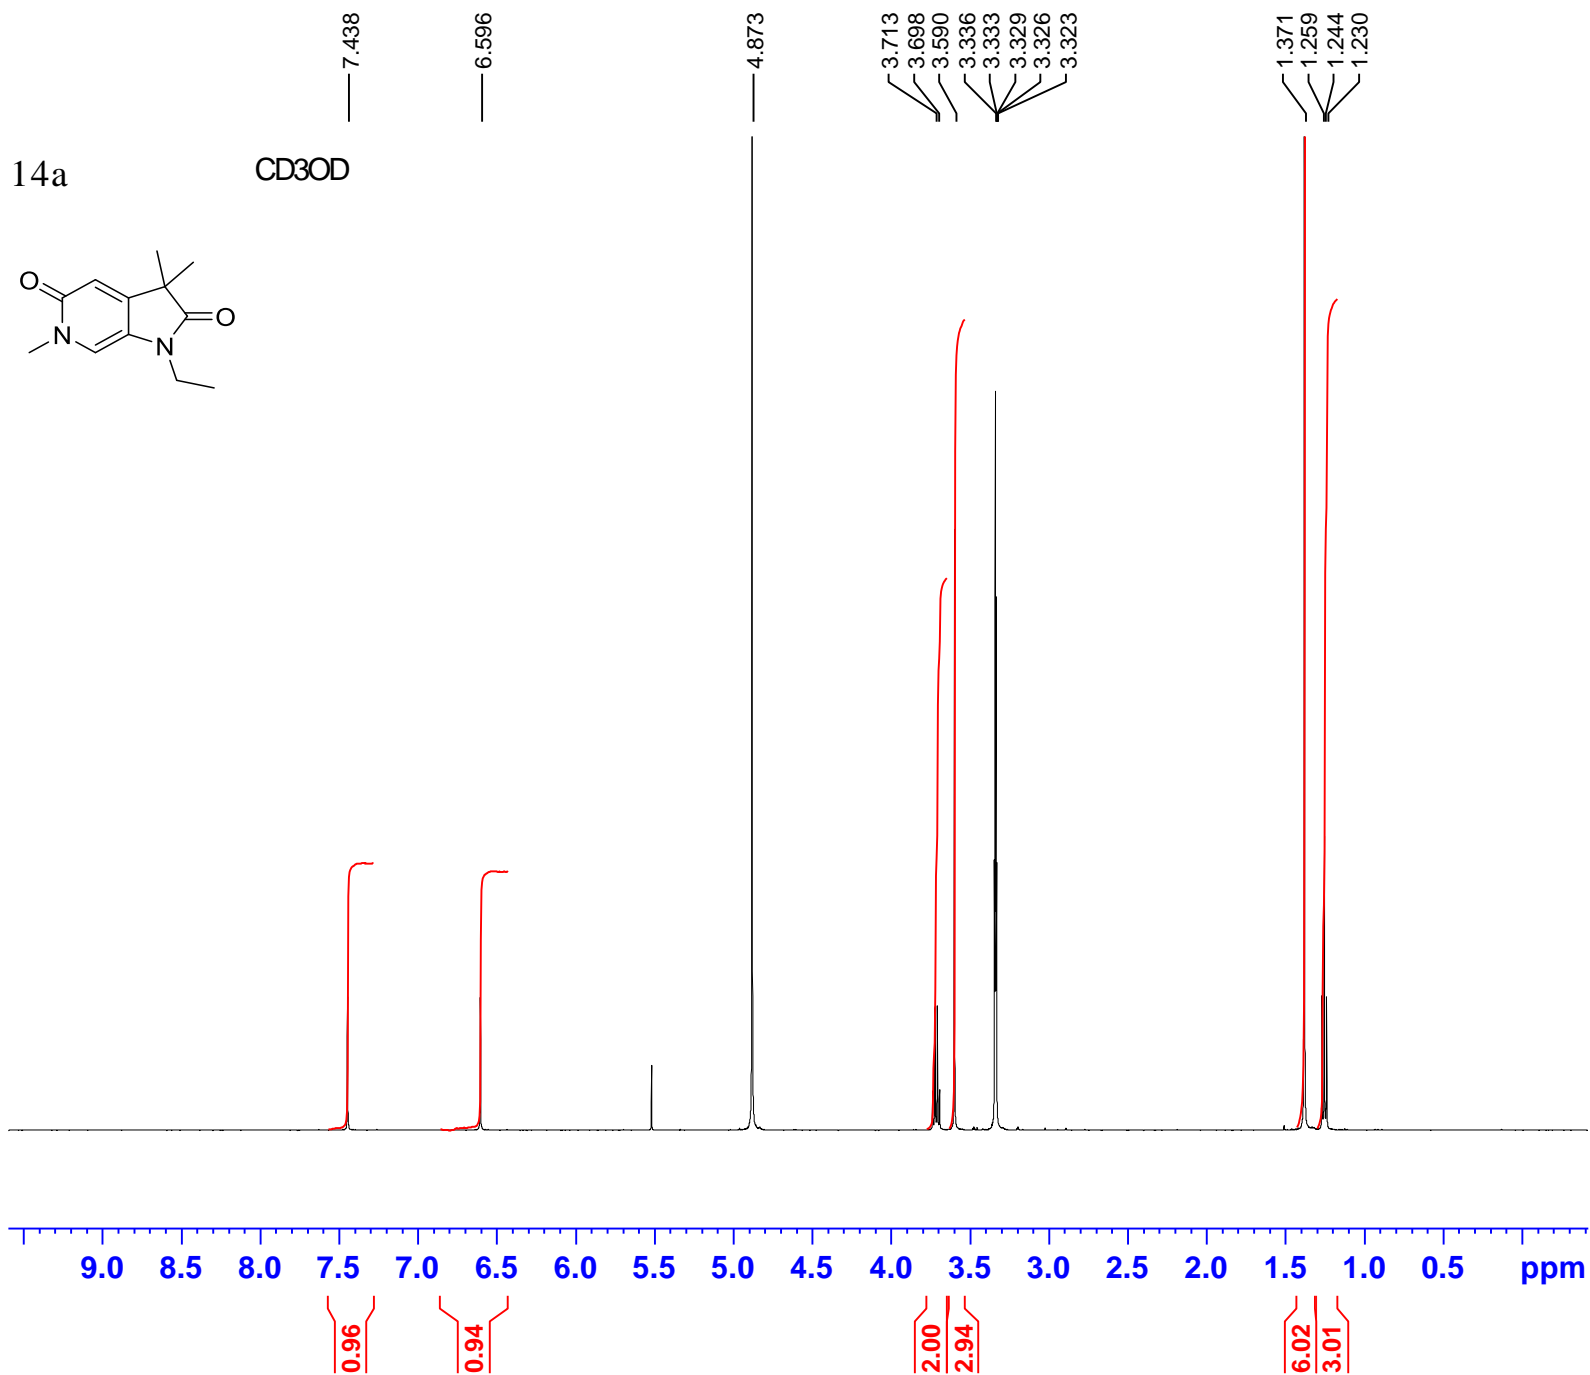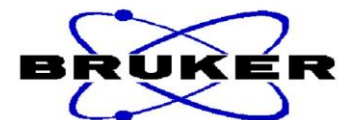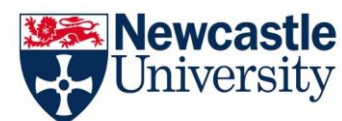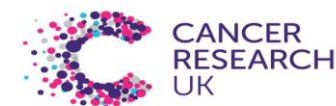

Current Data  
 Name DCM-494-29-A CD3OD  
 EXPNO 10  
 PROCNO 1

F2 - Acquisition  
 Parameters 20140910  
 Time 13.24  
 INSTRUM spect  
 PROBHD 5 mm PABBO BB-  
 PULPROG zg30  
 TD 65536  
 SOLVENT MeOD  
 NS 16  
 DS 0  
 SWH 10330.578 Hz  
 FIDRES 0.157632 Hz  
 AQ 3.1719425 sec  
 RG 575  
 DW 48.400 usec  
 DE 11.99 usec  
 TE 297.9 K  
 D1 1.00000000 sec  
 TDO 1

==== CHANNEL f1 =====  
 SFO1 500.3030896 MHz  
 NUC1 1H  
 P1 16.25 usec  
 PLW1 18.33600044 W

F2 - Processing parameters SI  
 65536  
 SF 500.2999951 MHz  
 WDW EM  
 SSB 0  
 LB 0.30 Hz  
 GB 0  
 PC 1.00

14a

CD3OD

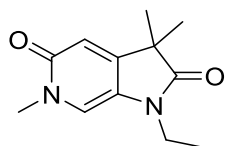

178.79

162.56

153.50

125.90

116.53

113.12

48.22  
48.10  
48.05  
47.93  
47.88  
47.76  
47.71  
47.59  
47.54  
47.50  
47.42  
47.33  
47.25  
47.08  
44.06  
36.82  
34.72  
22.62  
10.88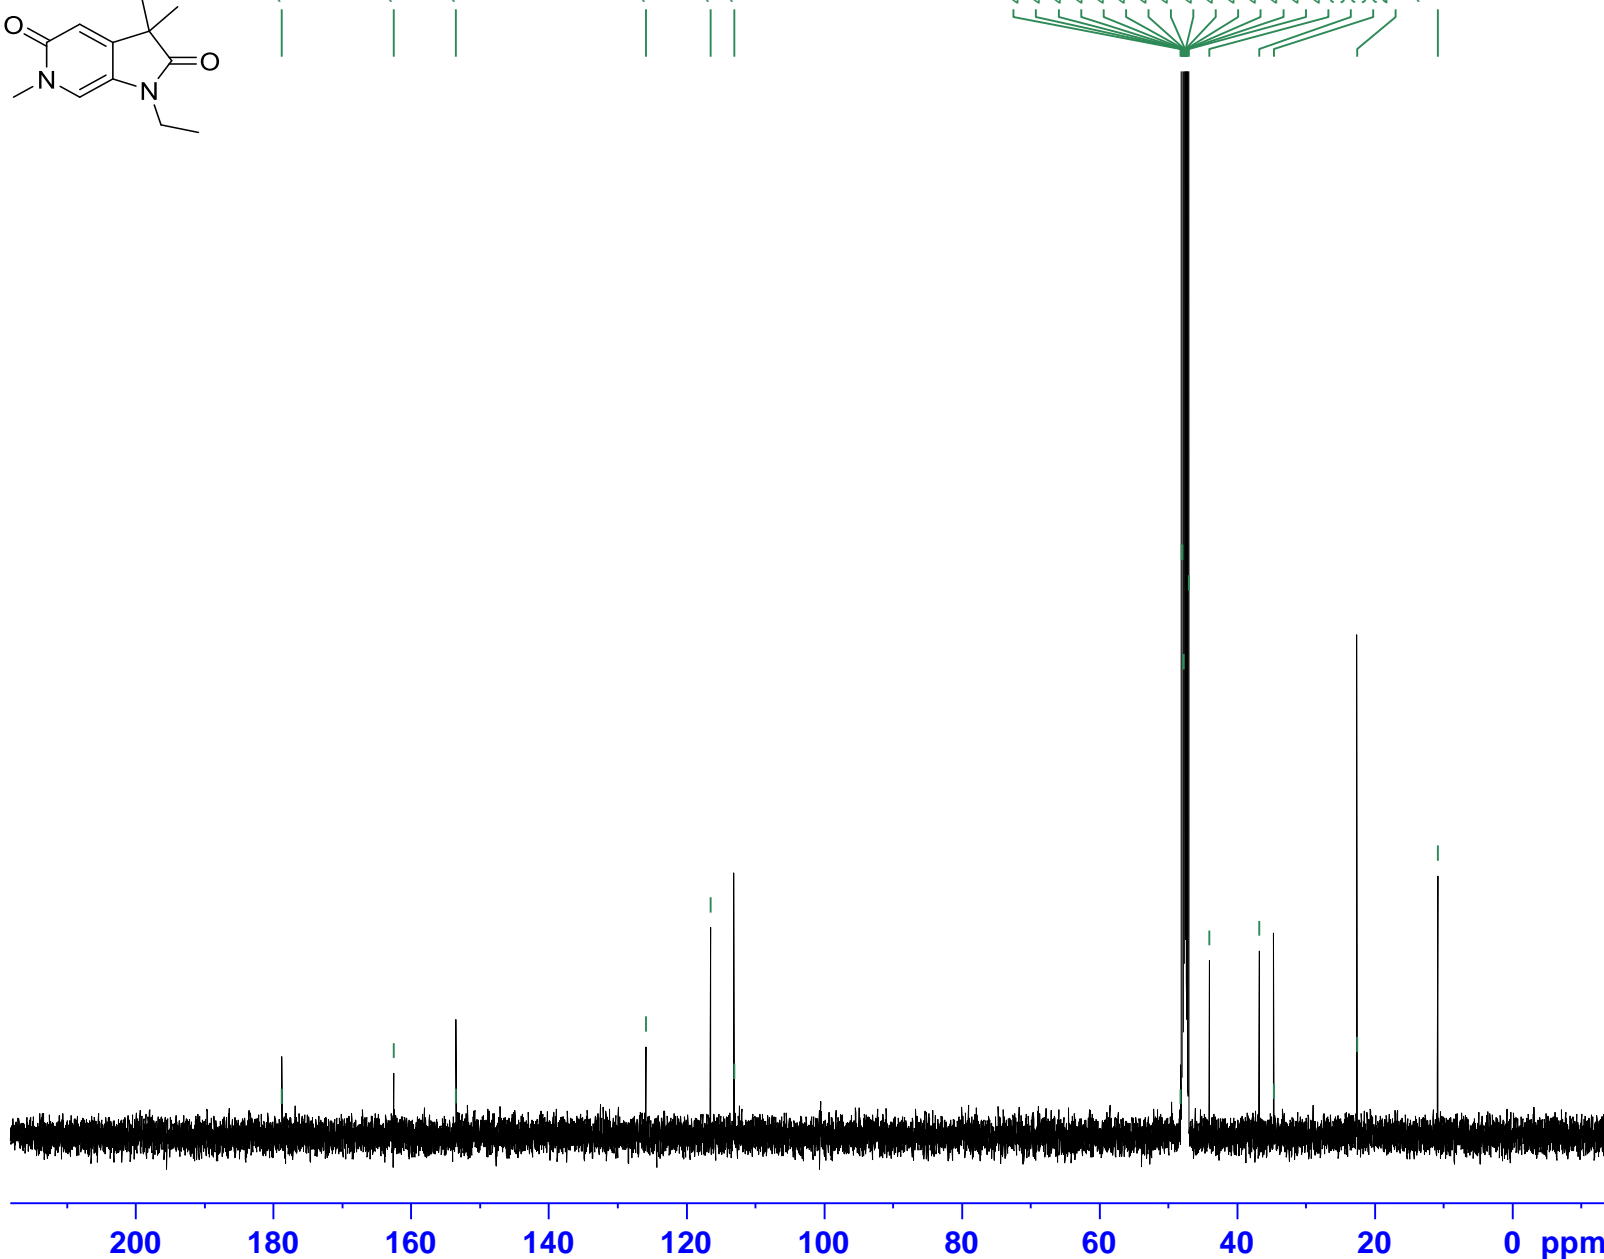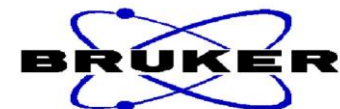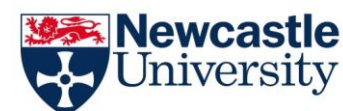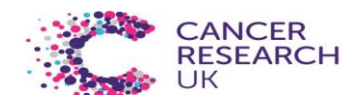

Current Data Parameters  
 NAME DCM-494-29-A CD3OD  
 EXPNO 11  
 PROCNO 1

F2 - Acquisition  
 Parameters Date\_ 20140911  
 Time 3.13  
 INSTRUM spect  
 PROBHD 5 mm PABBO BB-  
 PULPROG zgpg30  
 TD 65536  
 SOLVENT MeOD  
 NS 2048  
 DS 2  
 S/MH 29761.904 Hz  
 FIDRES 0.454131 Hz  
 AQ 1.1010048 sec  
 RG 456  
 DW 16.800 usec  
 DE 7.68 usec  
 TE 298.6 K  
 D1 2.0000000 sec  
 D11 0.0300000 sec  
 TD0 1

===== CHANNEL f1 =====

SFO1 125.8131151 MHz  
 NUC1 13C  
 P1 9.75 usec  
 PLW1 82.38999939 W

===== CHANNEL f2 =====

SFO2 500.3020012 MHz  
 NUC2 1H  
 CPDPRG[2] waltz16  
 PCPD2 80.00 usec  
 PLW2 18.33600044 W  
 PLW12 0.7565400 W  
 PLW13 0.48418999 W

F2 - Processing  
 Parameters 65536  
 SF 125.8005350 MHz  
 VDV EM  
 SSB 0  
 LB 1.00 Hz  
 GB 0  
 PC 1.40

14b

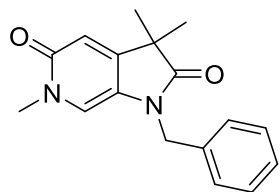

7.358  
7.344  
7.318  
7.299  
7.285  
6.573  
4.753  
3.328  
2.508  
1.322

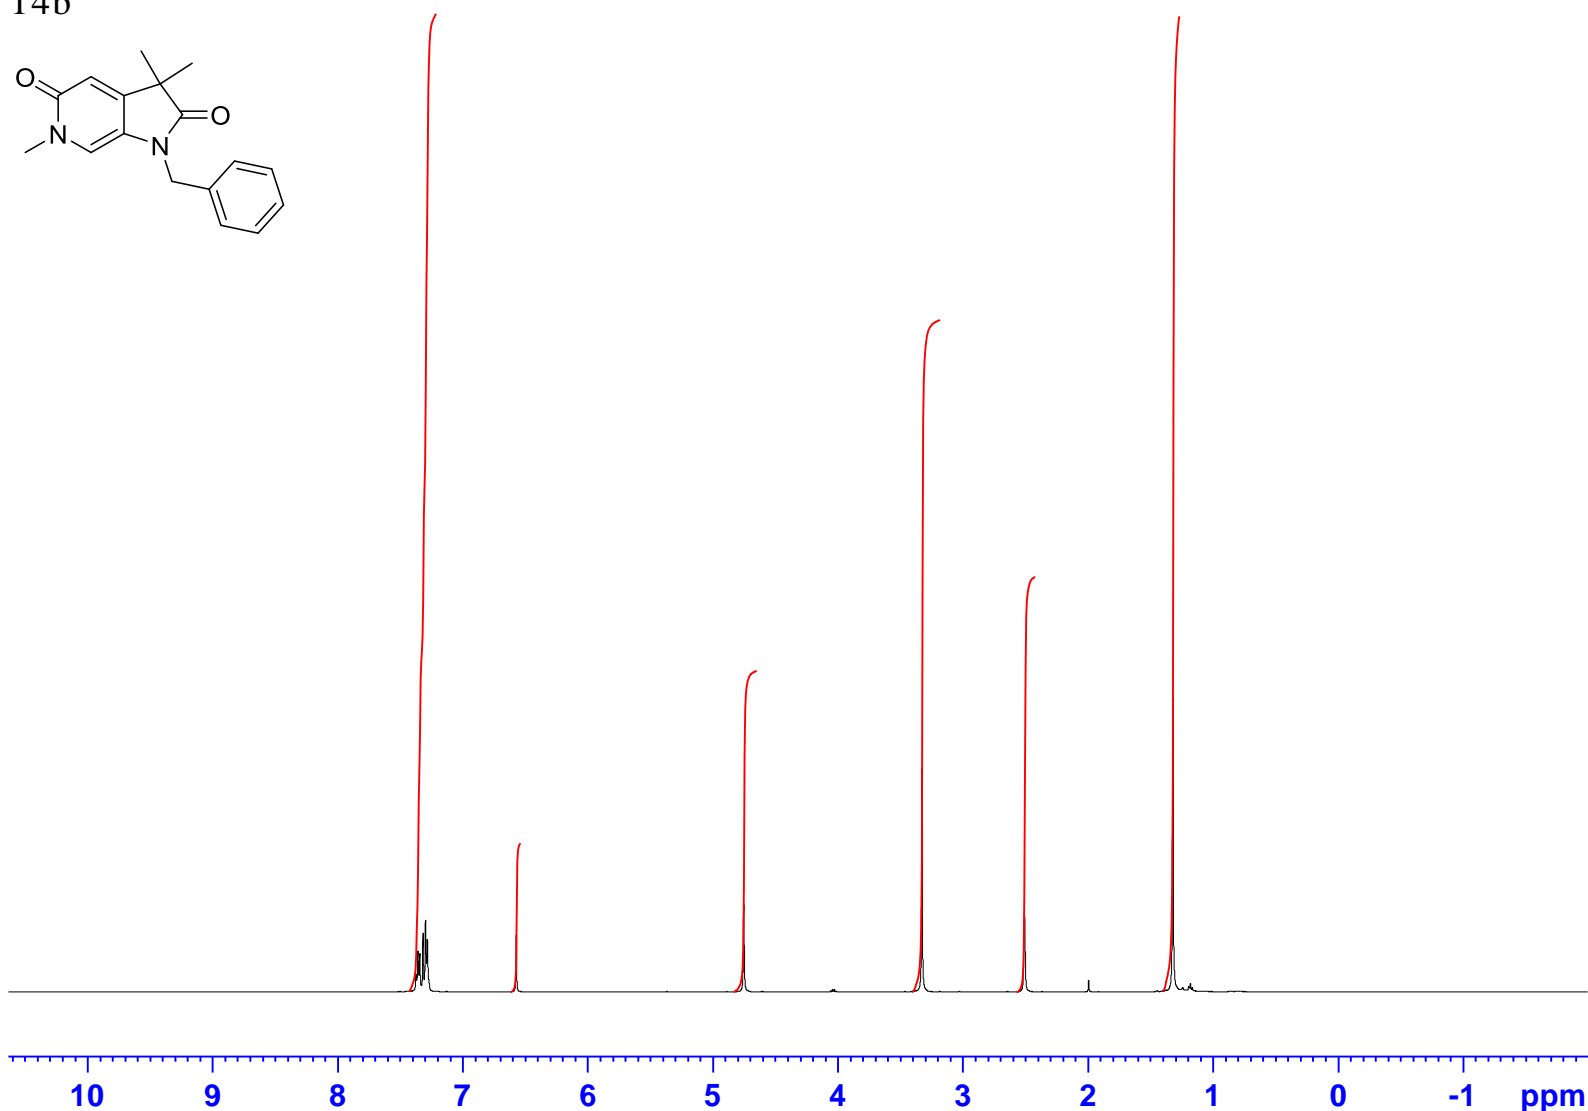

6.09  
0.93  
2.00  
4.19  
2.59  
6.09

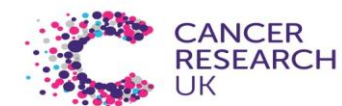

Current Data  
NAME SA-473-192  
EXPNO 20  
PROCNO 1

F2 - Acquisition  
Date\_ 20141128  
Time 10.03  
INSTRUM spect  
PROBHD 5 mm PABBO BB-  
PULPROG zg30  
TD 65536  
SOLVENT DMSO  
NS 16  
DS 0  
SWH 10330.578 Hz  
FIDRES 0.157632 Hz  
AQ 3.1719425 sec  
RG 406  
DW 48.400 usec  
DE 11.99 usec  
TE 298.0 K  
D1 1.00000000 sec  
TDO 1

===== CHANNEL f1 =====  
SFO1 500.3030896 MHz  
NUC1 1H  
P1 16.25 usec  
PLW1 18.33600044 W

F2 - Processing parameters SI  
65536  
SF 500.3000000 MHz  
WDW EM  
SSB 0  
LB 0.30 Hz  
GB 0  
PC 1.00

14b

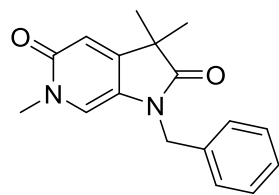

178.26

161.19

152.16

136.35

129.18

127.95

127.56

124.32

117.17

114.19

43.87

43.25

40.52

40.35

40.18

40.01

39.85

39.68

39.51

37.27

24.15

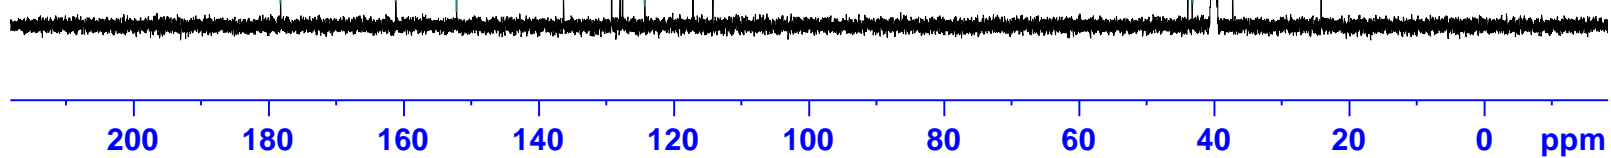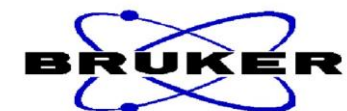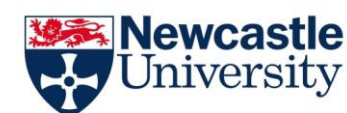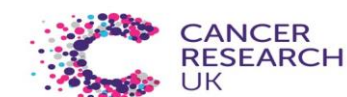

Current Data Parameters  
 NAME SA-473-192  
 EXPNO 21  
 PROCNO 1

F2 - Acquisition  
 Parameters Date\_ 20141128  
 Time 10.25  
 INSTRUM spect  
 PROBHD 5 mm PABBO BB-  
 PULPROG zgpg30  
 TD 65536  
 SOLVENT DMSO  
 NS 256  
 DS 2  
 S/MH 29761.904 Hz  
 FIDRES 0.454131 Hz  
 AQ 1.1010048 sec  
 RG 456  
 DW 16.800 usec  
 DE 7.68 usec  
 TE 298.0 K  
 D1 2.0000000 sec  
 D11 0.03000000 sec  
 TD0 1

===== CHANNEL f1 =====

SFO1 125.8131151 MHz  
 NUC1 13C  
 P1 9.75 usec  
 PLW1 82.38999939 W

===== CHANNEL f2 =====

SFO2 500.3020012 MHz  
 NUC2 1H  
 CPDPRG[2] waltz16  
 PCPD2 80.00 usec  
 PLW2 18.33600044 W  
 PLW12 0.75654000 W  
 PLW13 0.48418999 W

F2 - Processing

Parameters 65536  
 SF 125.8005350 MHz  
 WDW EM  
 SSB 0  
 LB 1.00 Hz  
 G 0  
 B 1.40  
 P  
 C



14c

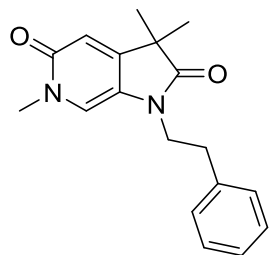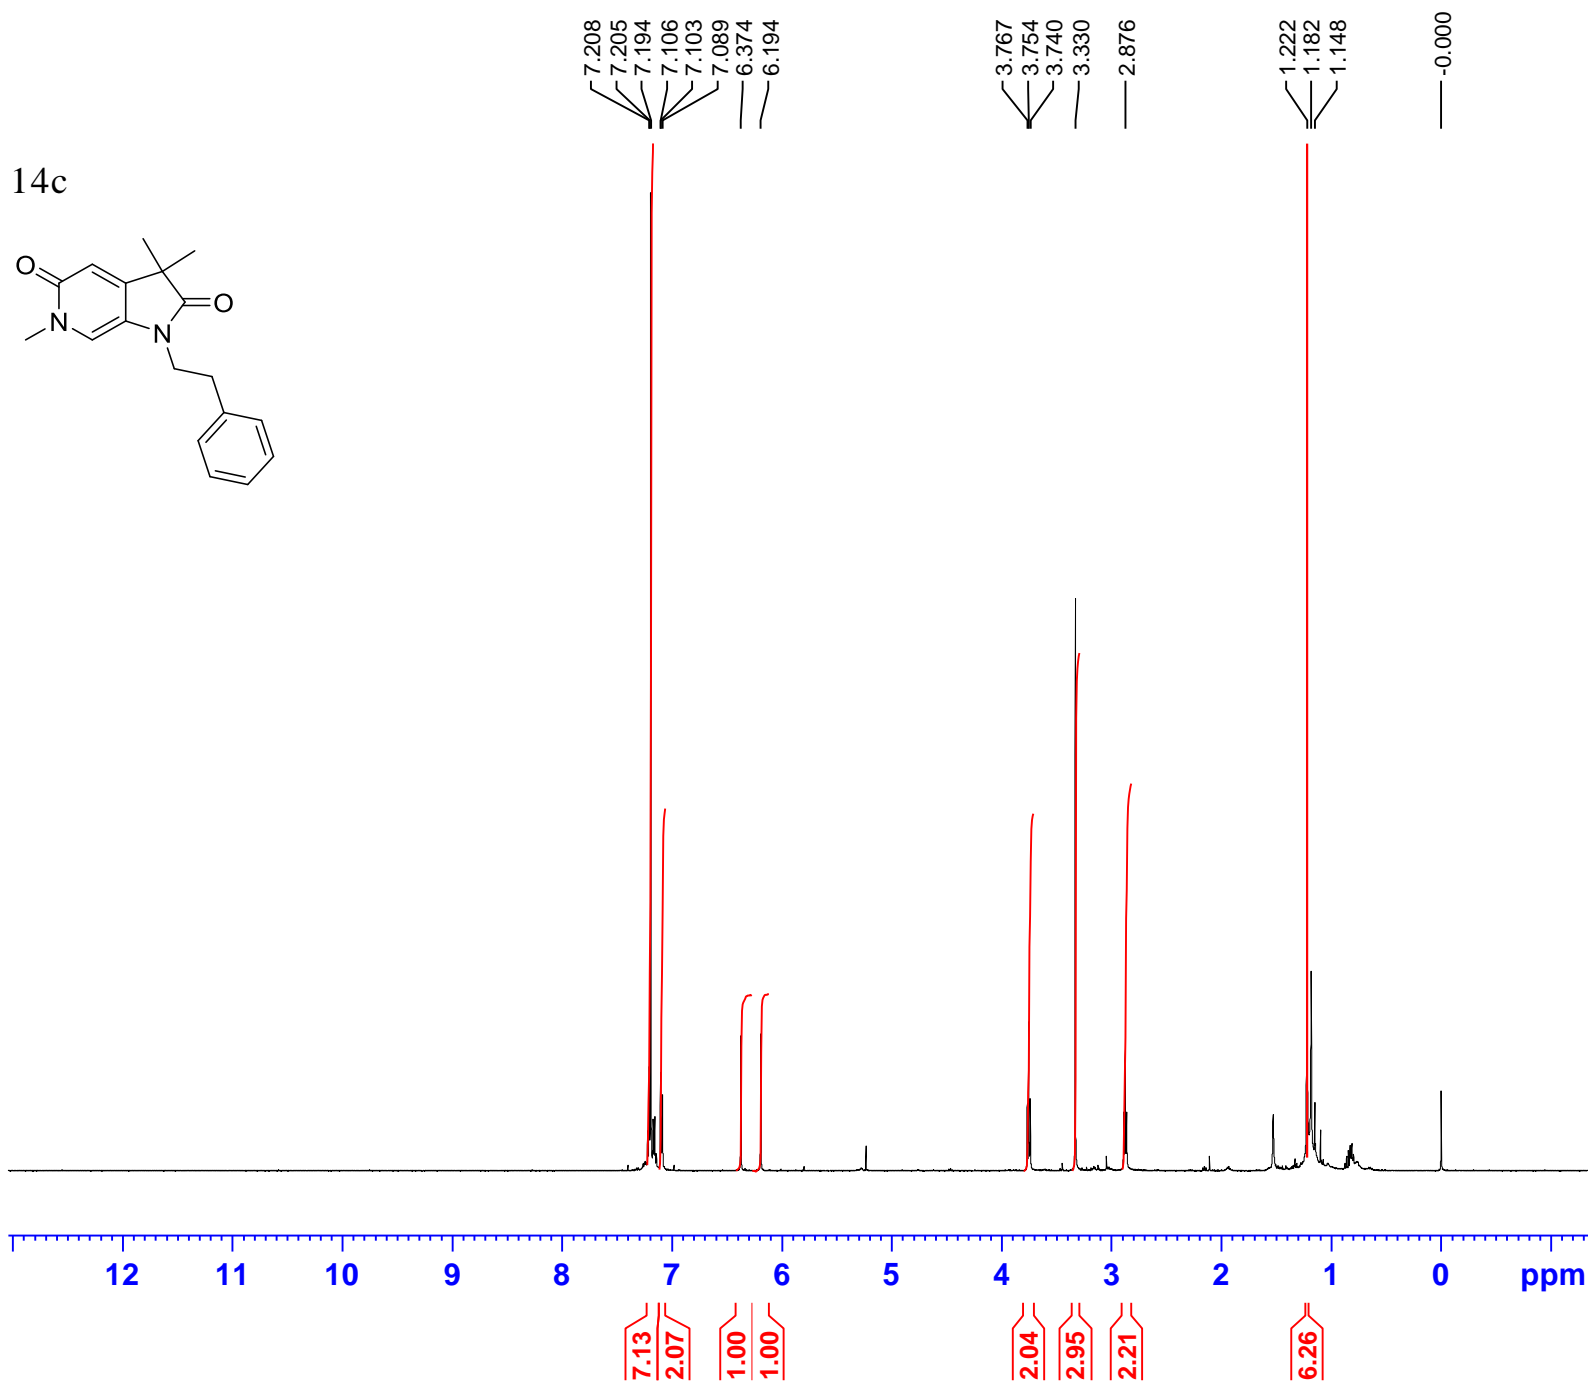

## Current Data

NAME SA-473-196  
EXPNO 30  
PROCNO 1

## F2 - Acquisition

Data 20141215  
Time 14.15  
INSTRUM spect  
PROBHD 5 mm PABBO BB-  
PULPROG zg30  
TD 65536  
SOLVENT CDCl3  
NS 16  
DS 0  
SWH 10330.578 Hz  
FIDRES 0.157632 Hz  
AQ 3.1719425 sec  
RG 645  
DW 48.400 usec  
DE 11.99 usec  
TE 290.9 K  
D1 1.00000000 sec  
TDO 1

==== CHANNEL f1 =====  
SFO1 500.3030896 MHz  
NUC1 1H  
P1 16.25 usec  
PLW1 18.33600044 W

## F2 - Processing parameters SI

65536  
SF 500.3000446 MHz  
WDW EM  
SSB 0  
LB 0.30 Hz  
GB 0  
PC 1.00

14c

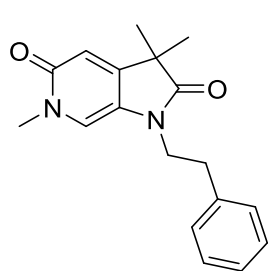

178.28  
 161.69  
 152.21  
 138.19  
 128.95  
 128.72  
 126.92  
 125.58  
 114.72  
 114.62  
 77.28  
 77.02  
 76.77  
 43.80  
 41.99  
 37.65  
 33.68  
 29.72  
 24.04

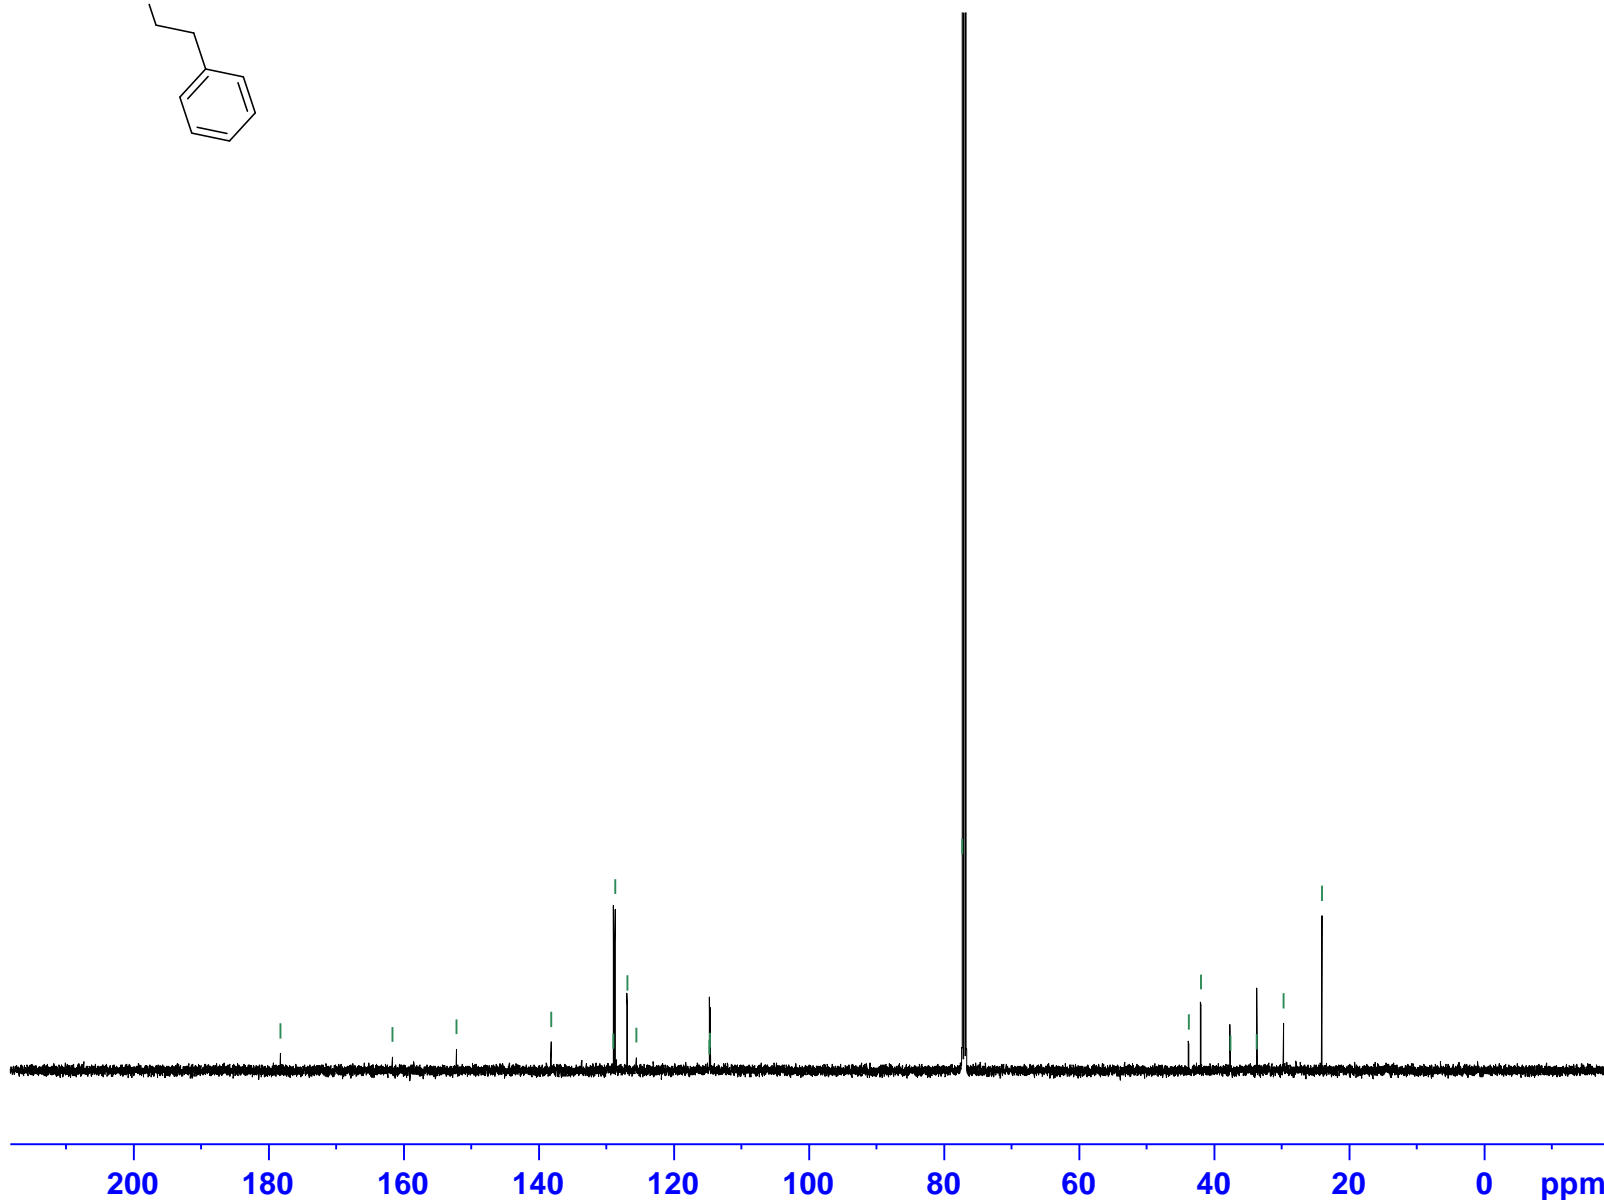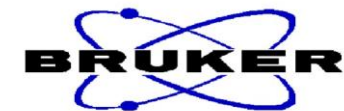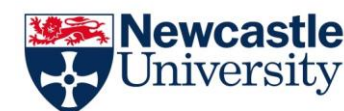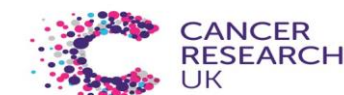

Current Data Parameters  
 NAME SA-473-196  
 EXPNO 31  
 PROCNO 1

F2 - Acquisition  
 Parameters Date\_ 20141217  
 Time 21.14  
 INSTRUM spect  
 PROBHD 5 mm PABBO BB-  
 PULPROG zgpg  
 TD 26782  
 SOLVENT CDCl3  
 NS 2048  
 DS 2  
 S/MH 29761.904 Hz  
 FIDRES 1.111265 Hz  
 AQ 0.4499376 sec  
 RG 575  
 DW 16.800 usec  
 DE 7.72 usec  
 TE 296.1 K  
 D1 5.0000000 sec  
 D11 0.0300000 sec  
 TD0 1

===== CHANNEL f1 =====

SFO1 125.8131151 MHz  
 NUC1 13C  
 P1 9.75 usec  
 PLW1 82.38999939 W

===== CHANNEL f2 =====

SFO2 500.3020012 MHz  
 NUC2 1H  
 CPDPRG[2] waltz16  
 PCPD2 80.00 usec  
 PLW2 18.33600044 W  
 PLW12 0.75654000 W  
 PLW13 0.48418999 W

F2 - Processing  
 Parameters 65536  
 SF 125.8005350 MHz  
 WDW EM  
 SSB 0  
 LB 1.00 Hz  
 GB 0  
 PC 1.40

14d

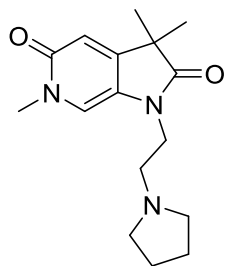

7.326  
6.473  
4.774  
3.701  
3.687  
3.471  
3.216  
3.212  
3.209  
3.206  
3.203  
2.670  
2.656  
2.531  
1.716  
1.709  
1.701  
1.262

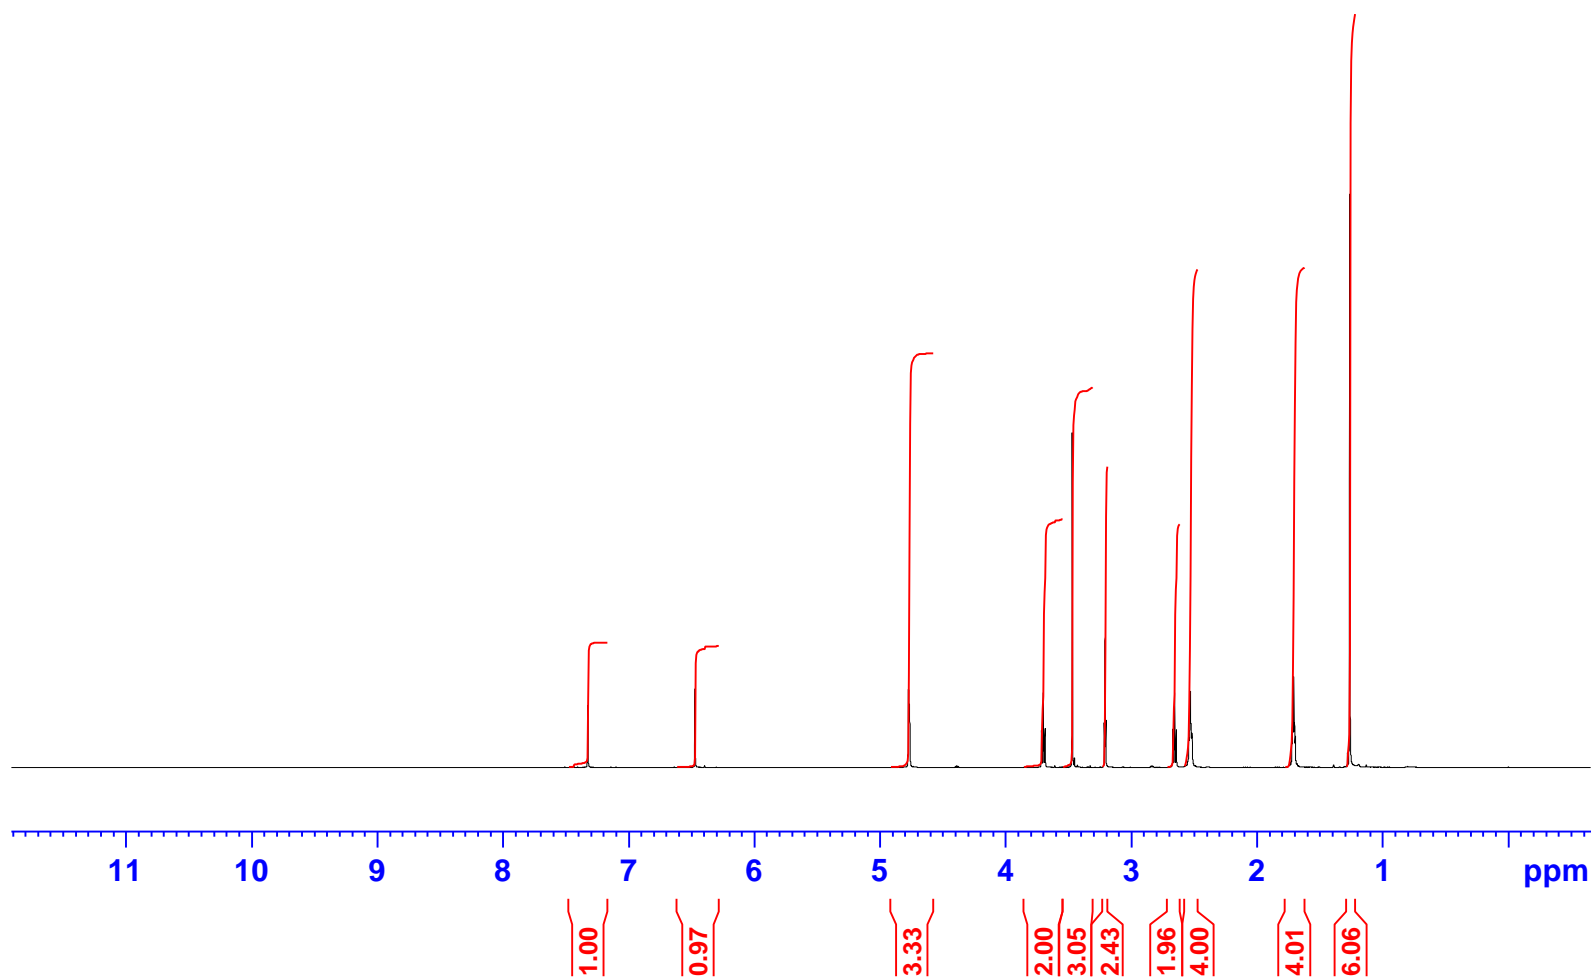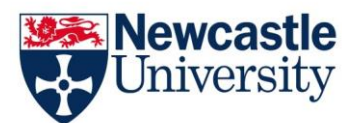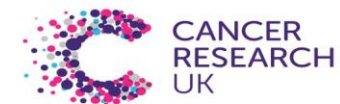

Current Data Parameters  
NAME SA-500-16-2nd  
EXPNO purification 11  
PROCNO 1

F2 - Acquisition  
Parameters 20150116  
Time 1.57  
INSTRUM spect  
PROBHD 5 mmPABBO BB-  
PULPROG zg30  
TD 65536  
SOLVENT MeOD  
NS 16  
DS 0  
SMH 10330.578 Hz  
FIDRES 0.157632 Hz  
AQ 3.1719425 sec  
RG 362  
DV 48.400 usec  
DE 11.99 usec  
TE 295.0 K  
D1 1.00000000 sec  
TD0 1

===== CHANNEL f1 =====  
SFO1 500.3030896 MHz  
NUC1 1H  
P1 16.25 usec  
PLW1 18.33600044 W

F2 - Processing  
Parameters 65536  
SF 500.3000602 MHz  
VDW EM  
SSB 0  
LB 0.30 Hz  
GB 0  
PC 1.00

14d

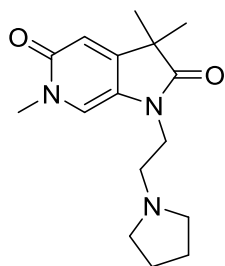

179.19

162.53

153.47

126.24

116.64

113.06

53.67  
51.58  
48.11  
47.94  
47.77  
47.60  
47.43  
47.25  
47.08  
44.05  
38.95  
36.85  
22.92  
22.72

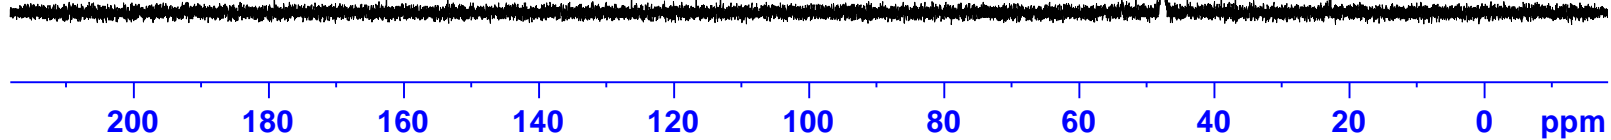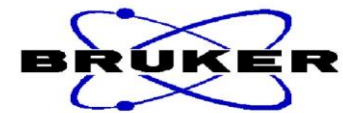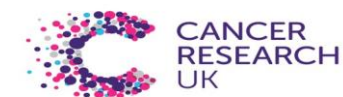

Current Data Parameters  
NAME SA-500-16-2nd\_purification  
EXPNO 10  
PROCNO 1

F2 - Acquisition Parameters  
Date\_ 20150116  
Time 1.54  
INSTRUM spect  
PROBHD 5 mm PABBO BB-  
PULPROG zgpg30  
TD 65536  
SOLVENT MeOD  
NS 256  
DS 2  
SMH 29761.904 Hz  
FIDRES 0.454131 Hz  
AQ 1.1010048 sec  
RG 456  
DW 16.800 usec  
DE 7.68 usec  
TE 296.9 K  
D1 2.0000000 sec  
D11 0.0300000 sec  
TD0 1

===== CHANNEL f1 =====  
SFO1 125.8131151 MHz  
NUC 13C  
1P1 9.75 usec  
PLW1 82.38999939 W

===== CHANNEL f2 =====  
SFO2 500.3020012 MHz  
NUC2 1H  
CPDPRG2 waltz16  
PCPD2 80.00 usec  
PLW2 18.33600044 W  
PLW12 0.75654000 W  
PLW13 0.48418999 W

F2 - Processing  
Parameters 65536  
SF 125.8005350 MHz  
WD EM  
W 0  
SSB 1.00 Hz  
LB 0  
GB 1.40  
PC

14e

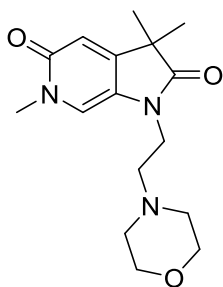

7.345  
6.478  
4.793  
3.700  
3.688  
3.525  
3.516  
3.507  
3.469  
3.216  
3.212  
3.209  
3.206  
3.203  
2.534  
2.522  
2.509  
2.417  
1.273

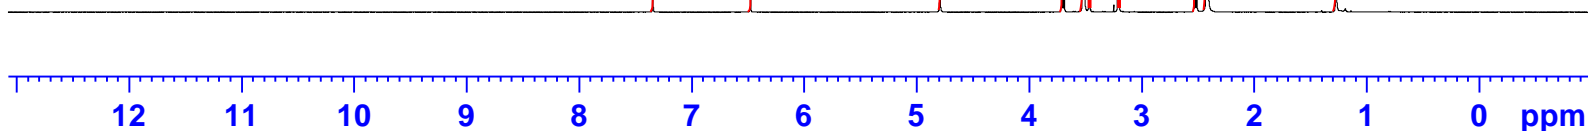

1.04  
1.00  
3.11  
2.10  
4.11  
3.20  
5.60  
2.14  
3.91  
6.46

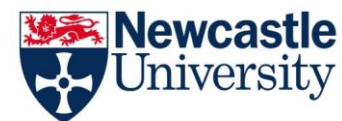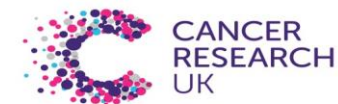

Current Data  
NAME SA-500-14  
EXPNO 30  
PROCNO 1

F2 - Acquisition  
Date\_ 20150115  
Time 15.20  
INSTRUM spect  
PROBHD 5 mm PABBO BB-  
PULPROG zg30  
TD 65536  
SOLVENT MeOD  
NS 16  
DS 0  
SWH 10330.578 Hz  
FIDRES 0.157632 Hz  
AQ 3.1719425 sec  
RG 512  
DW 48.400 usec  
DE 11.99 usec  
TE 293.7 K  
D1 1.00000000 sec  
TDO 1

==== CHANNEL f1 =====  
SFO1 500.3030896 MHz  
NUC1 1H  
P1 16.25 usec  
PLW1 18.33600044 W

F2 - Processing parameters SI  
65536  
SF 500.3000602 MHz  
WDW EM  
SSB 0  
LB 0.30 Hz  
GB 0  
PC 1.00

14e

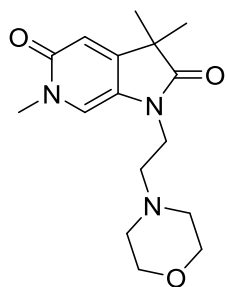

179.35  
162.52  
153.50  
126.12  
116.77  
113.01  
66.58  
53.88  
53.24  
47.93  
47.76  
47.59  
47.42  
47.25  
44.04  
36.86  
36.82  
22.82

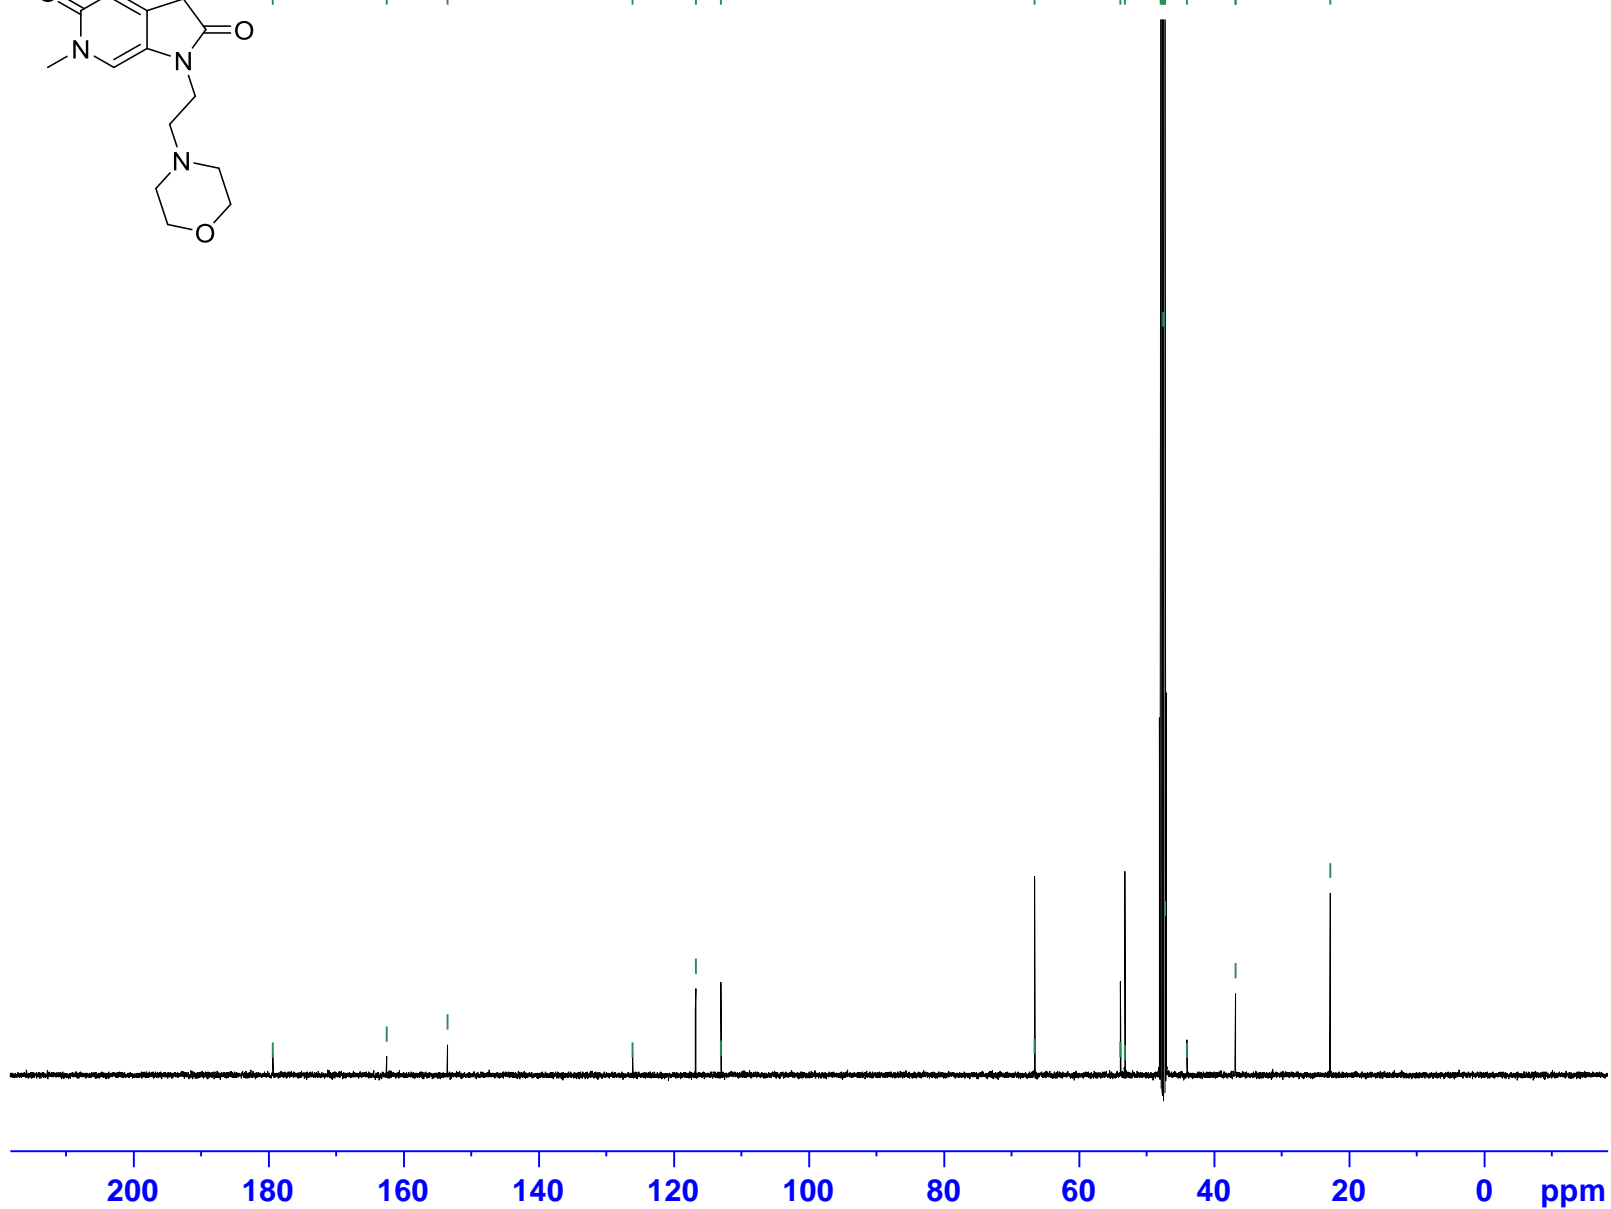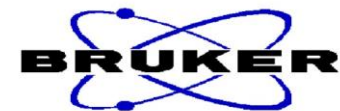

Current Data Parameters  
NAME SA-500-14  
EXPNO 35  
PROCNO 1

F2 - Acquisition  
Parameters Date\_ 20150116  
Time 1.36  
INSTRUM spect  
PROBHD 5 mm PABBO BB-  
PULPROG zgpg  
TD 26782  
SOLVENT MeOD  
NS 2048  
DS 2  
SMH 29761.904 Hz  
FIDRES 1.111265 Hz  
AQ 0.4499376 sec  
RG 456  
DW 16.800 usec  
DE 7.72 usec  
TE 296.6 K  
D1 5.0000000 sec  
D11 0.03000000 sec  
TD0 1

===== CHANNEL f1 =====

SFO1 125.8131151 MHz  
NUC1 13C  
P1 9.75 usec  
PLW1 82.38999939 W

===== CHANNEL f2 =====

SFO2 500.3020012 MHz  
NUC2 1H  
CPDPRG[2] waltz16  
PCPD2 80.00 usec  
PLW2 18.33600044 W  
PLW12 0.75654000 W  
PLW13 0.48418999 W

F2 - Processing

Parameters 65536  
SF 125.8005350 MHz  
WDW EM  
SSB 0  
LB 1.00 Hz  
GB 0  
PC 1.40

":\Old Server\SA\nmr"

14f

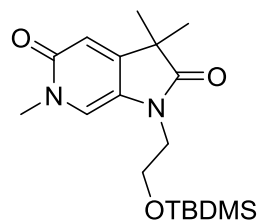

7.49

6.56

3.42

3.36

2.55

2.55

2.55

1.30

0.83

0.82

-0.00

1.00

0.97

1.99

2.02

2.98

6.29

9.00

5.91

8

6

4

2

0

[ppm]

[rel]

15

10

5

0

14f

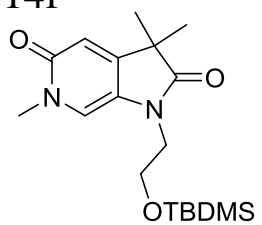

— 178.14

— 161.12

— 152.23

— 125.14

— 117.61

— 113.67

60.01

43.69

42.56

40.52

40.35

40.27

40.18

40.02

39.85

39.68

39.51

37.23

26.05

24.16

— 18.21

— -5.09

100.00

200

150

100

50

0

[ppm]

[rel]

6

4

2

0



14g

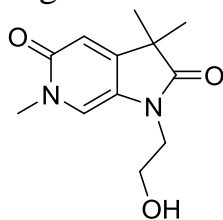

7.441  
6.520  
4.826  
3.605  
3.598  
3.586  
3.575  
3.392  
3.324  
2.516  
2.512  
2.508  
2.505  
2.501  
1.263



Current Data  
NAME SA-473-216  
EXPNO 20  
PROCNO 1

F2 - Acquisition  
Date\_ Time 20141211 14.32  
INSTRUM spect  
PROBHD 5 mm PABBO BB-  
PULPROG zg30  
TD 65536  
SOLVENT DMSO  
NS 16  
DS 0  
SWH 10330.578 Hz  
FIDRES 0.157632 Hz  
AQ 3.1719425 sec  
RG 575  
DW 48.400 usec  
DE 11.99 usec  
TE 297.7 K  
D1 1.00000000 sec  
TDO 1

===== CHANNEL f1 =====  
SFO1 500.3030896 MHz  
NUC1 1H  
P1 16.25 usec  
PLW1 18.33600044 W

F2 - Processing parameters SI  
65536  
SF 500.3000000 MHz  
WDW EM  
SSB 0  
LB 0.30 Hz  
GB 0  
PC 1.00

11 10 9 8 7 6 5 4 3 2 1 0 ppm

1.00 0.98 0.99 4.06 2.97 1.21 4.87 6.20

14g

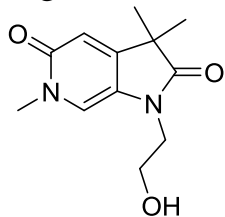182.47  
178.23161.15  
152.41125.22  
117.30  
113.7057.98  
43.74  
42.92  
40.61  
40.51  
40.44  
40.35  
40.27  
40.18  
40.01  
39.85  
39.68  
39.51  
37.25  
24.17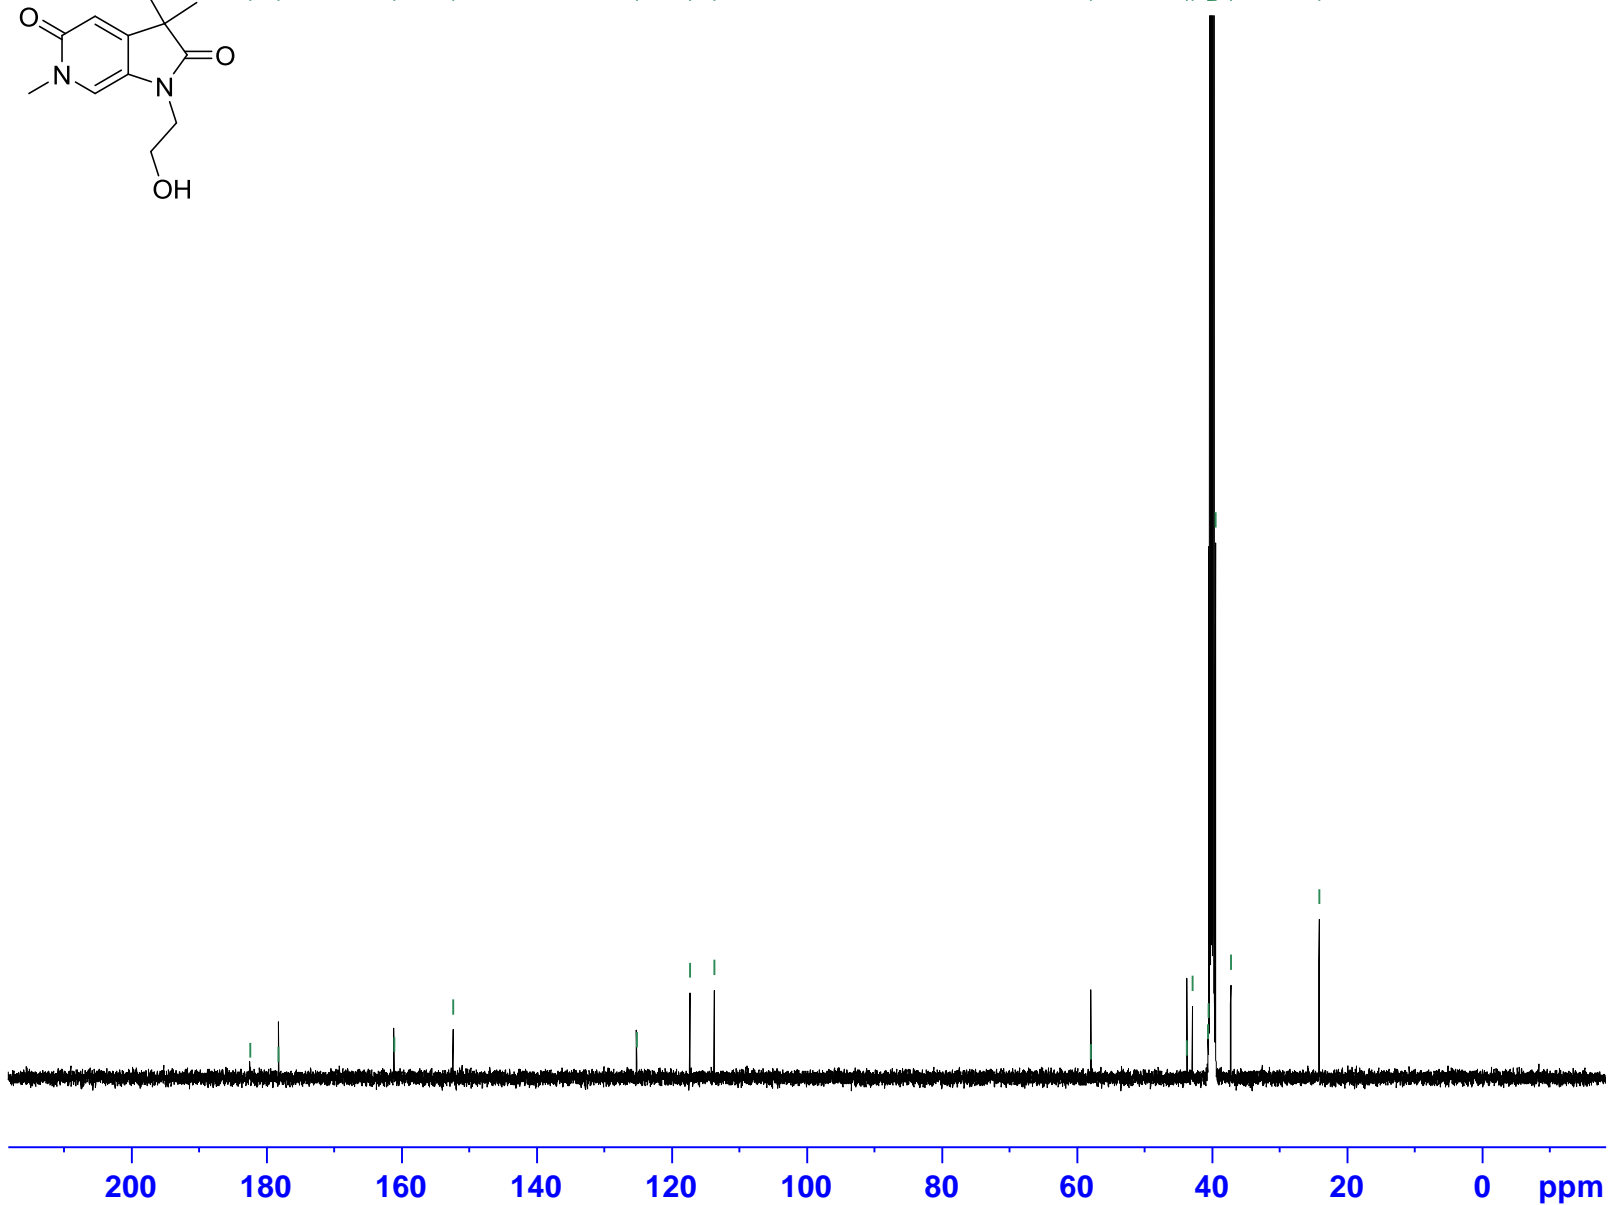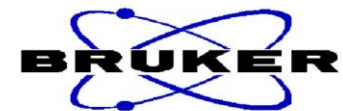

Current Data Parameters  
 NAME SA-473-216  
 EXPNO 25  
 PROCNO 1

F2 - Acquisition  
 Parameters Date\_ 20141212  
 Time 0.55  
 INSTRUM spect  
 PROBHD 5 mm PABBO BB-  
 PULPROG zgpg30  
 TD 65536  
 SOLVENT DMSO  
 NS 1024  
 DS 2  
 S/MH 29761.904 Hz  
 FIDRES 0.454131 Hz  
 AQ 1.1010048 sec  
 RG 456  
 DW 16.800 usec  
 DE 7.68 usec  
 TE 298.0 K  
 D1 2.0000000 sec  
 D11 0.03000000 sec  
 TD0 1

===== CHANNEL f1 =====

SFO1 125.8131151 MHz  
 NUC1 13C  
 P1 9.75 usec  
 PLW1 82.38999939 W

===== CHANNEL f2 =====

SFO2 500.3020012 MHz  
 NUC2 1H  
 CPDPRG[2] waltz16  
 PCPD2 80.00 usec  
 PLW2 18.33600044 W  
 PLW12 0.75654000 W  
 PLW13 0.48418999 W

F2 - Processing

Parameters 65536  
 SF 125.8005350 MHz  
 WDW EM  
 SSB 0  
 LB 1.00 Hz  
 GB 0  
 PC 1.40

15c

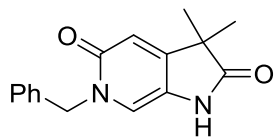

7.357  
7.356  
7.333  
7.327  
7.285  
6.880  
6.879  
6.569

5.122

1.690

1.405

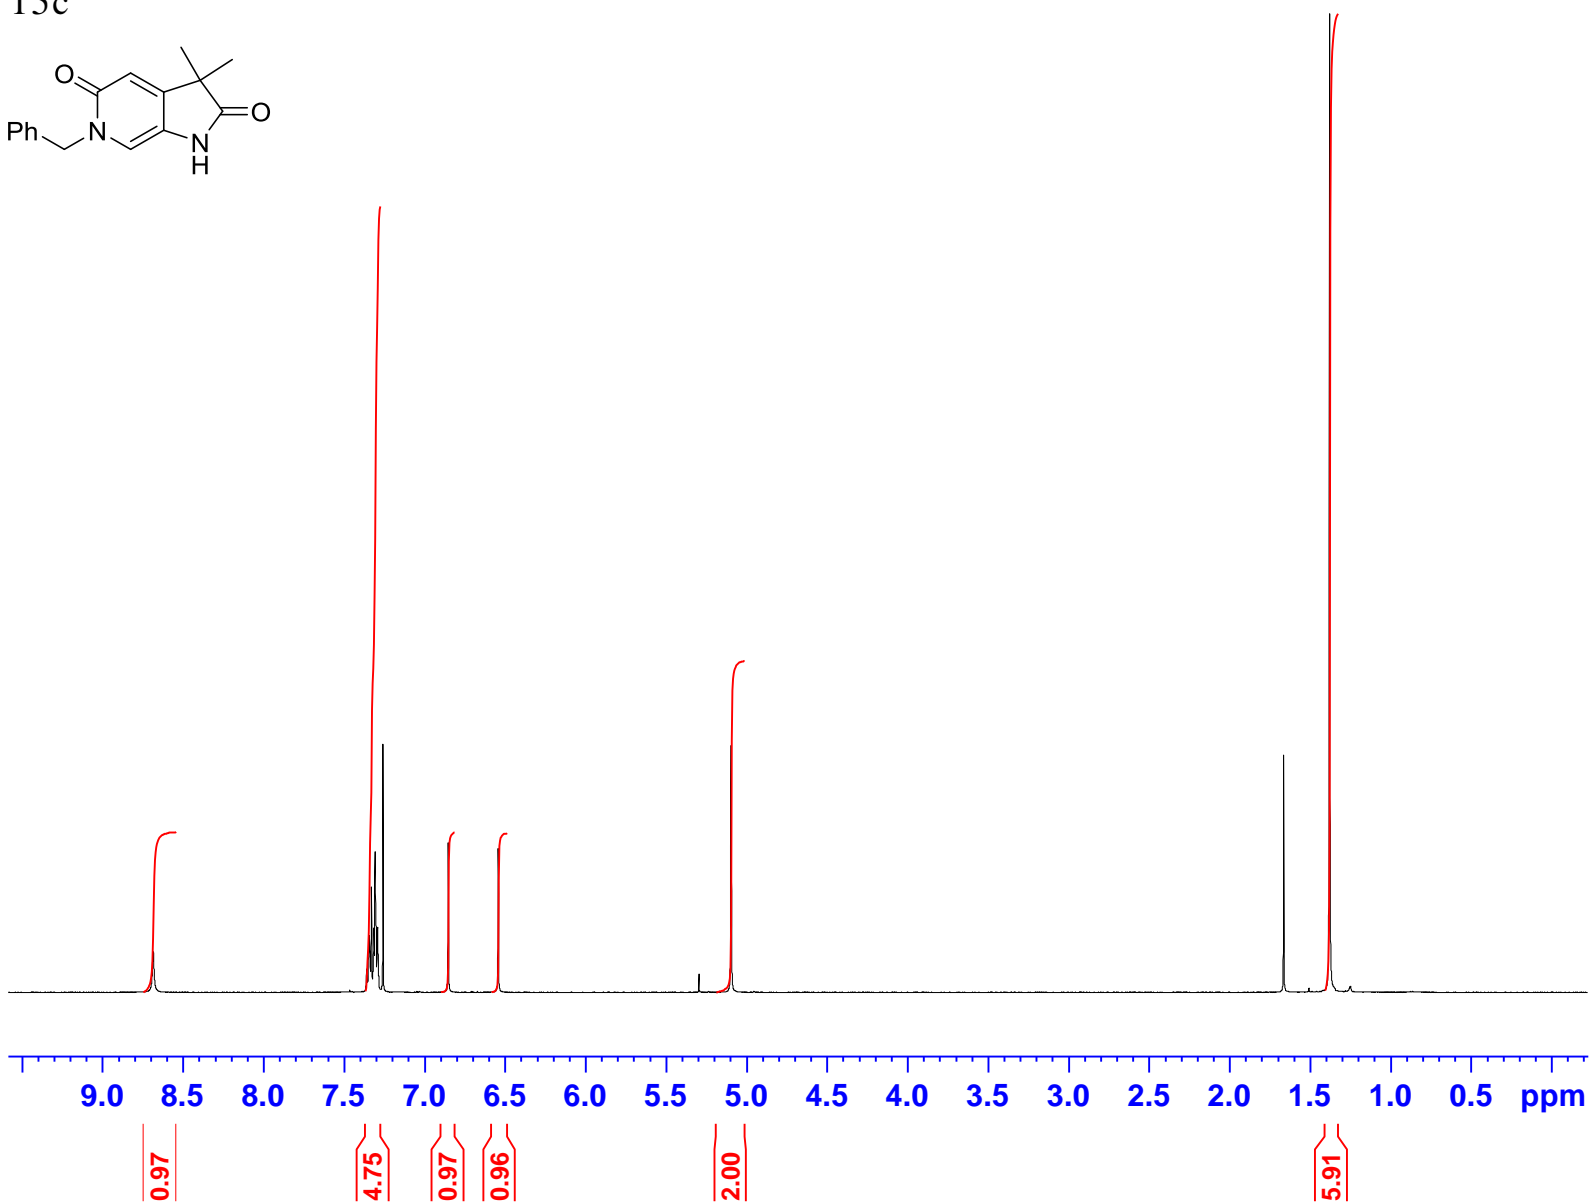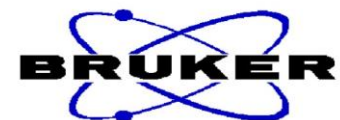

Current Data Parameters  
NAME DCM-494-73-B CDCL3 CONC  
EXPNO 11  
PROCNO 1

F2 - Acquisition  
Parameters 20141029  
Time 8.32  
INSTRUM spect  
PROBHD 5 mmPABBO BB-  
PULPROG zg30  
TD 65536  
SOLVENT CDCl3  
NS 16  
DS 0  
SWH 10330.578 Hz  
FIDRES 0.157632 Hz  
AQ 3.1719425 sec  
RG 456  
DV 48.400 usec  
DE 11.99 usec  
TE 298.0 K  
D1 1.00000000 sec  
TD0 1

===== CHANNEL f1 =====  
SFO1 500.3030896 MHz  
NUC1 1H  
P1 16.25 usec  
PLW1 18.33600044 W

F2 - Processing  
Parameters 65536  
S 500.3000125 MHz  
WDW EM  
SSB 0  
LB 0.30 Hz  
GB 0  
PC 1.00

15c

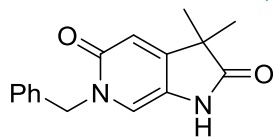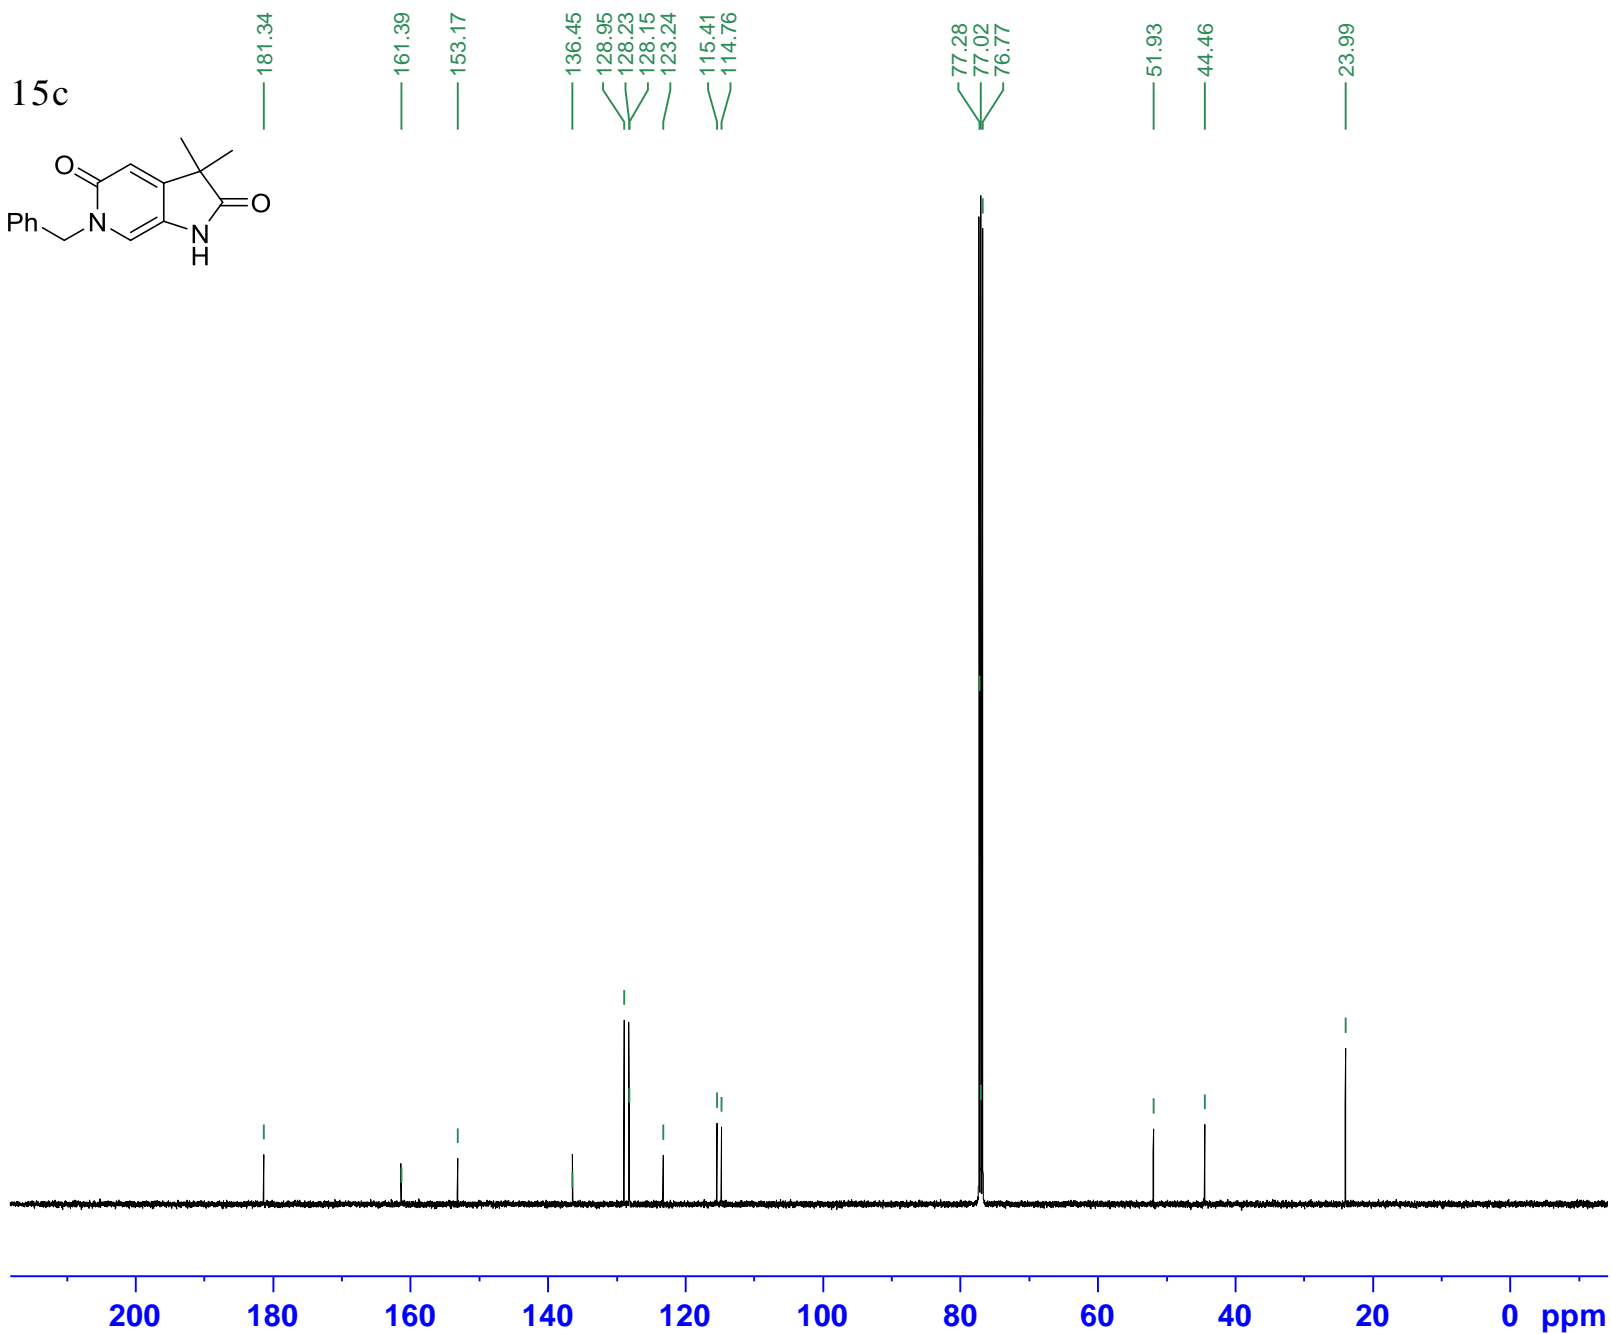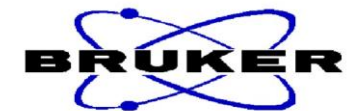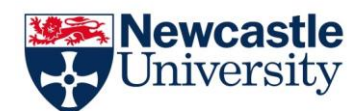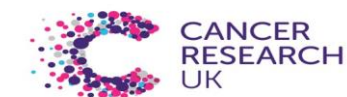

Current Data Parameters  
 NAME DCM-494-73-B CDCL3 CONC  
 EXPNO 10  
 PROCNO 1

F2 - Acquisition Parameters  
 Date\_ 20141029  
 Time 4.42  
 INSTRUM spect  
 PROBHD 5 mmPABBO BB-  
 PULPROG zgpg30  
 TD 65536  
 SOLVEN CDCl3  
 TNS 2048  
 DS 2  
 SMH 29761.904 Hz  
 FIDRES 0.454131 Hz  
 AQ 1.1010048 sec  
 RG 575  
 DW 16.800 usec  
 DE 7.68 usec  
 TE 298.1 K  
 D1 2.0000000 sec  
 D11 0.0300000 sec  
 TD0 1

==== CHANNEL f1 =====  
 SFO1 125.8131151 MHz  
 NUC1 13C  
 P1 9.75 usec  
 PLW1 82.3899939 W

==== CHANNEL f2 =====  
 SFO2 500.3020012 MHz  
 NUC2 1H  
 CPDPRG2 waltz16  
 PCPD2 80.00 usec  
 PLW2 18.33600044 W  
 PLW12 0.75654000 W  
 PLW13 0.48418999 W

F2 - Processing parameters  
 S1 65536  
 SF 125.8005350 MHz  
 VDW EM  
 SSB 0  
 LB 1.00 Hz  
 CB 0  
 PC 1.40

7.294  
7.279  
7.259  
7.194  
7.191  
7.178  
6.600  
6.517

4.094  
4.079

3.041

1.598  
1.391

15d

CDCl<sub>3</sub>

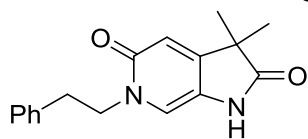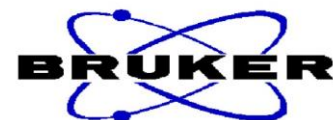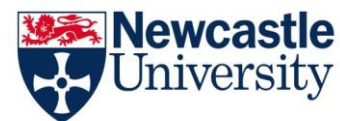

Current Data  
NAME DCM-494-80-A CDCl<sub>3</sub>  
EXPNO 10  
PROCNO 1

F2 - Acquisition  
Data parameters 20141030  
Time 14.22  
INSTRUM spect  
PROBHD 5 mm PABBO BB-  
PULPROG zg30  
TD 65536  
SOLVENT CDCl<sub>3</sub>  
NS 16  
DS 0  
SWH 10330.578 Hz  
FIDRES 0.157632 Hz  
AQ 3.1719425 sec  
RG 645  
DW 48.400 usec  
DE 11.99 usec  
TE 298.1 K  
D1 1.00000000 sec  
TDO 1

==== CHANNEL f1 =====  
SFO1 500.3030896 MHz  
NUC1 1H  
P1 16.25 usec  
PLW1 18.33600044 W

F2 - Processing parameters SI  
65536  
SF 500.3000127 MHz  
WDW EM  
SSB 0  
LB 0.30 Hz  
GB 0  
PC 1.00

10 9 8 7 6 5 4 3 2 1 ppm

0.97  
2.03  
1.12  
2.03  
1.00  
1.00

2.03

2.01

1.64  
6.09

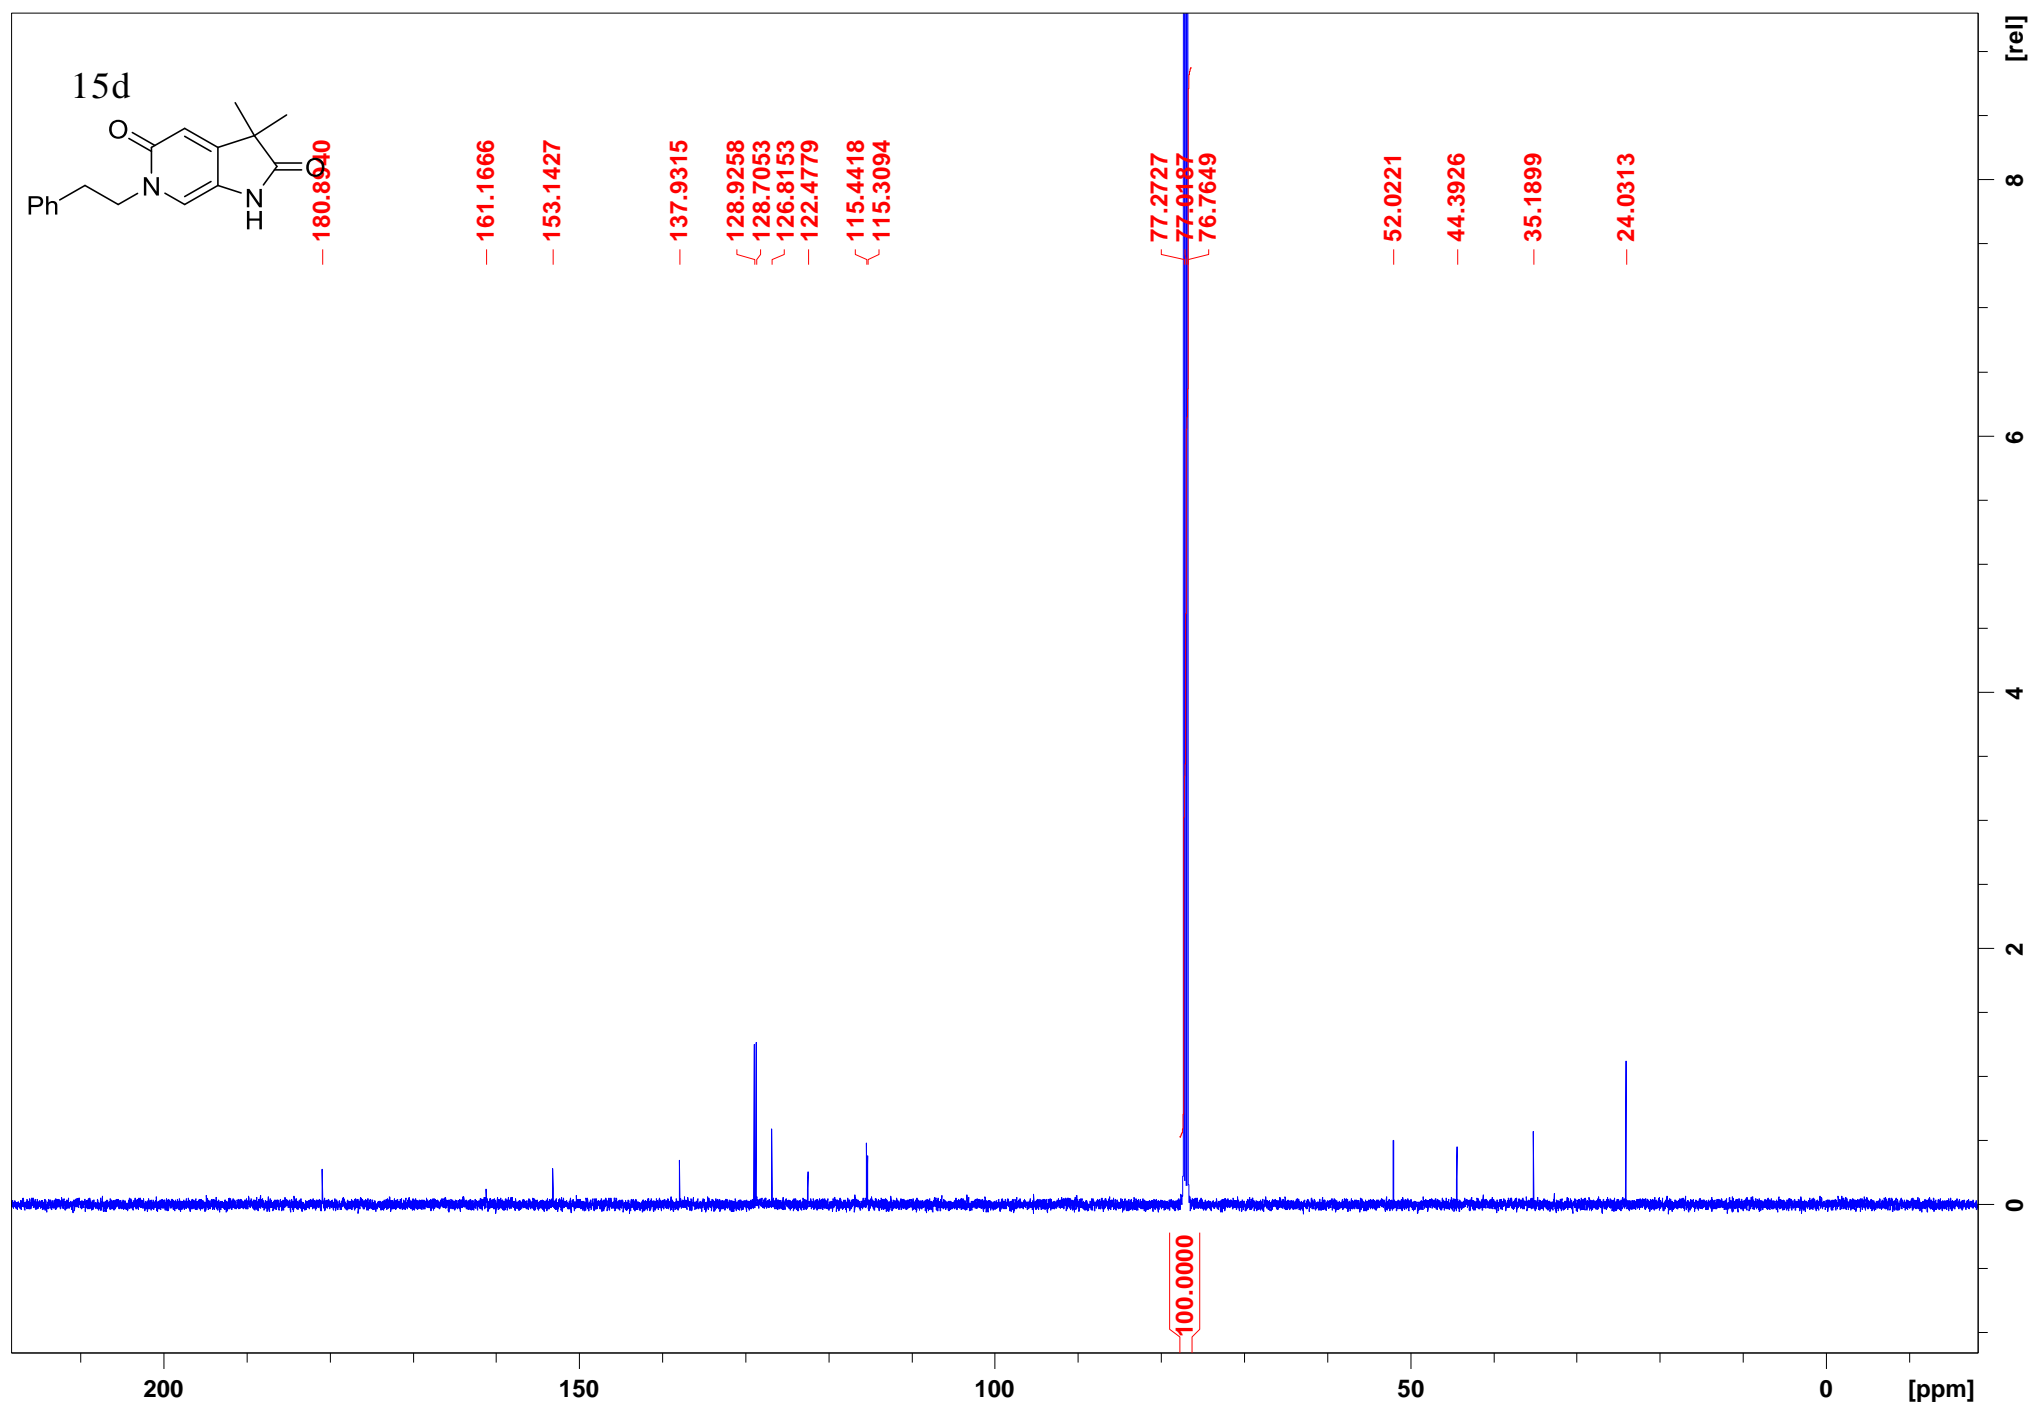

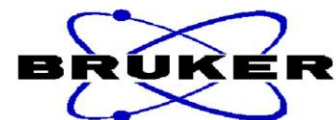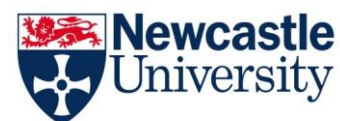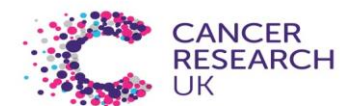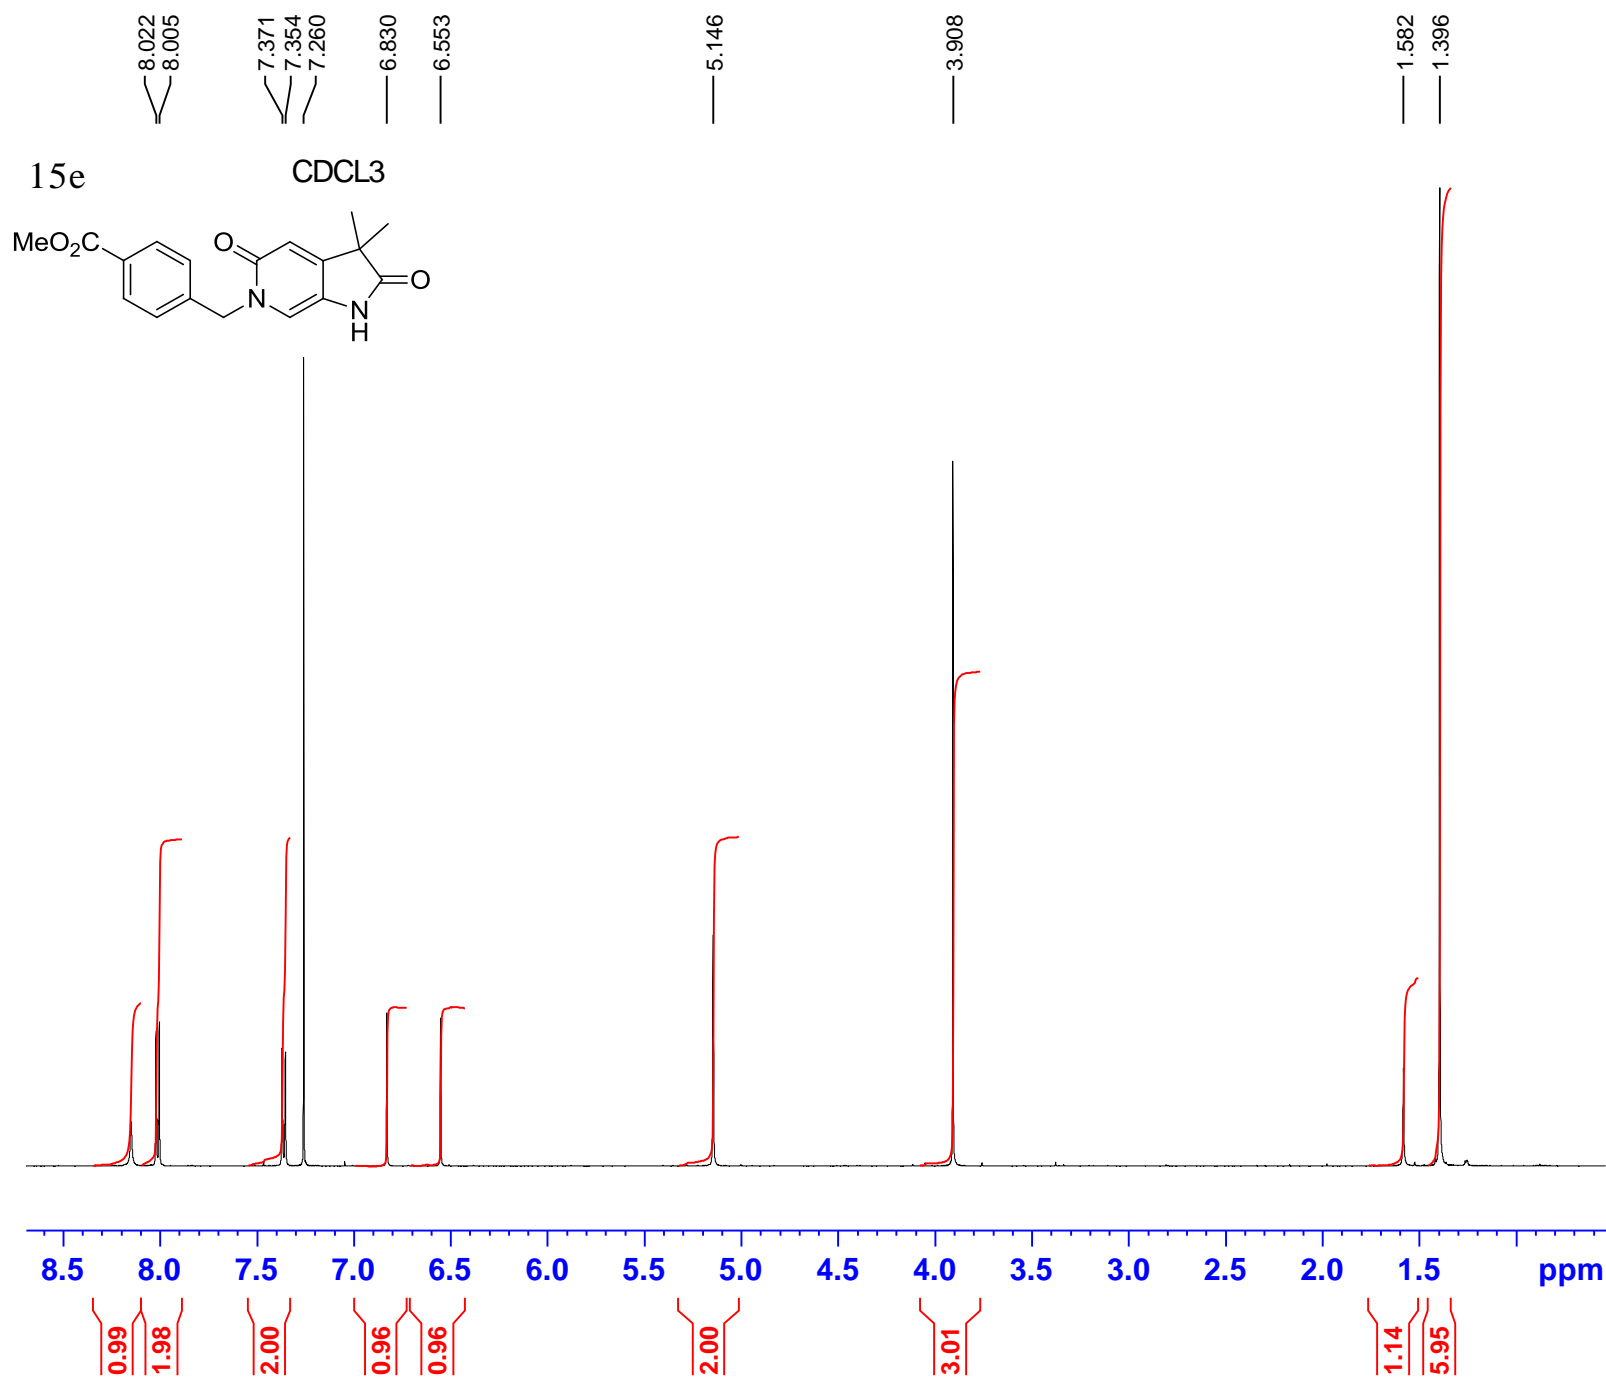

Current Data Parameters  
NAME DCM-494-115-A\_CDCl3\_CONC  
EXPNO 10  
PROCNO 1

F2 - Acquisition  
Date\_ 20141209  
Time 16.21  
INSTRUM spect  
PROBHD 5 mmPABBO BB-  
PULPROG zg30  
TD 65536  
SOLVENT CDCl3  
NS 16  
DS 0  
SWH 10330.578 Hz  
FIDRES 0.157632 Hz  
AQ 3.1719425 sec  
RG 645  
DV 48.400 usec  
DE 11.99 usec  
TE 298.1 K  
D1 1.00000000 sec  
TD0 1

===== CHANNEL f1 =====  
SFO1 500.3030896 MHz  
NUC1 1H  
P1 16.25 usec  
PLW1 18.33600044 W

F2 - Processing  
Parameters 65536  
SF 500.3000124 MHz  
VDM EM  
SSB 0  
LB 0.30 Hz  
GB 0  
PC 1.00

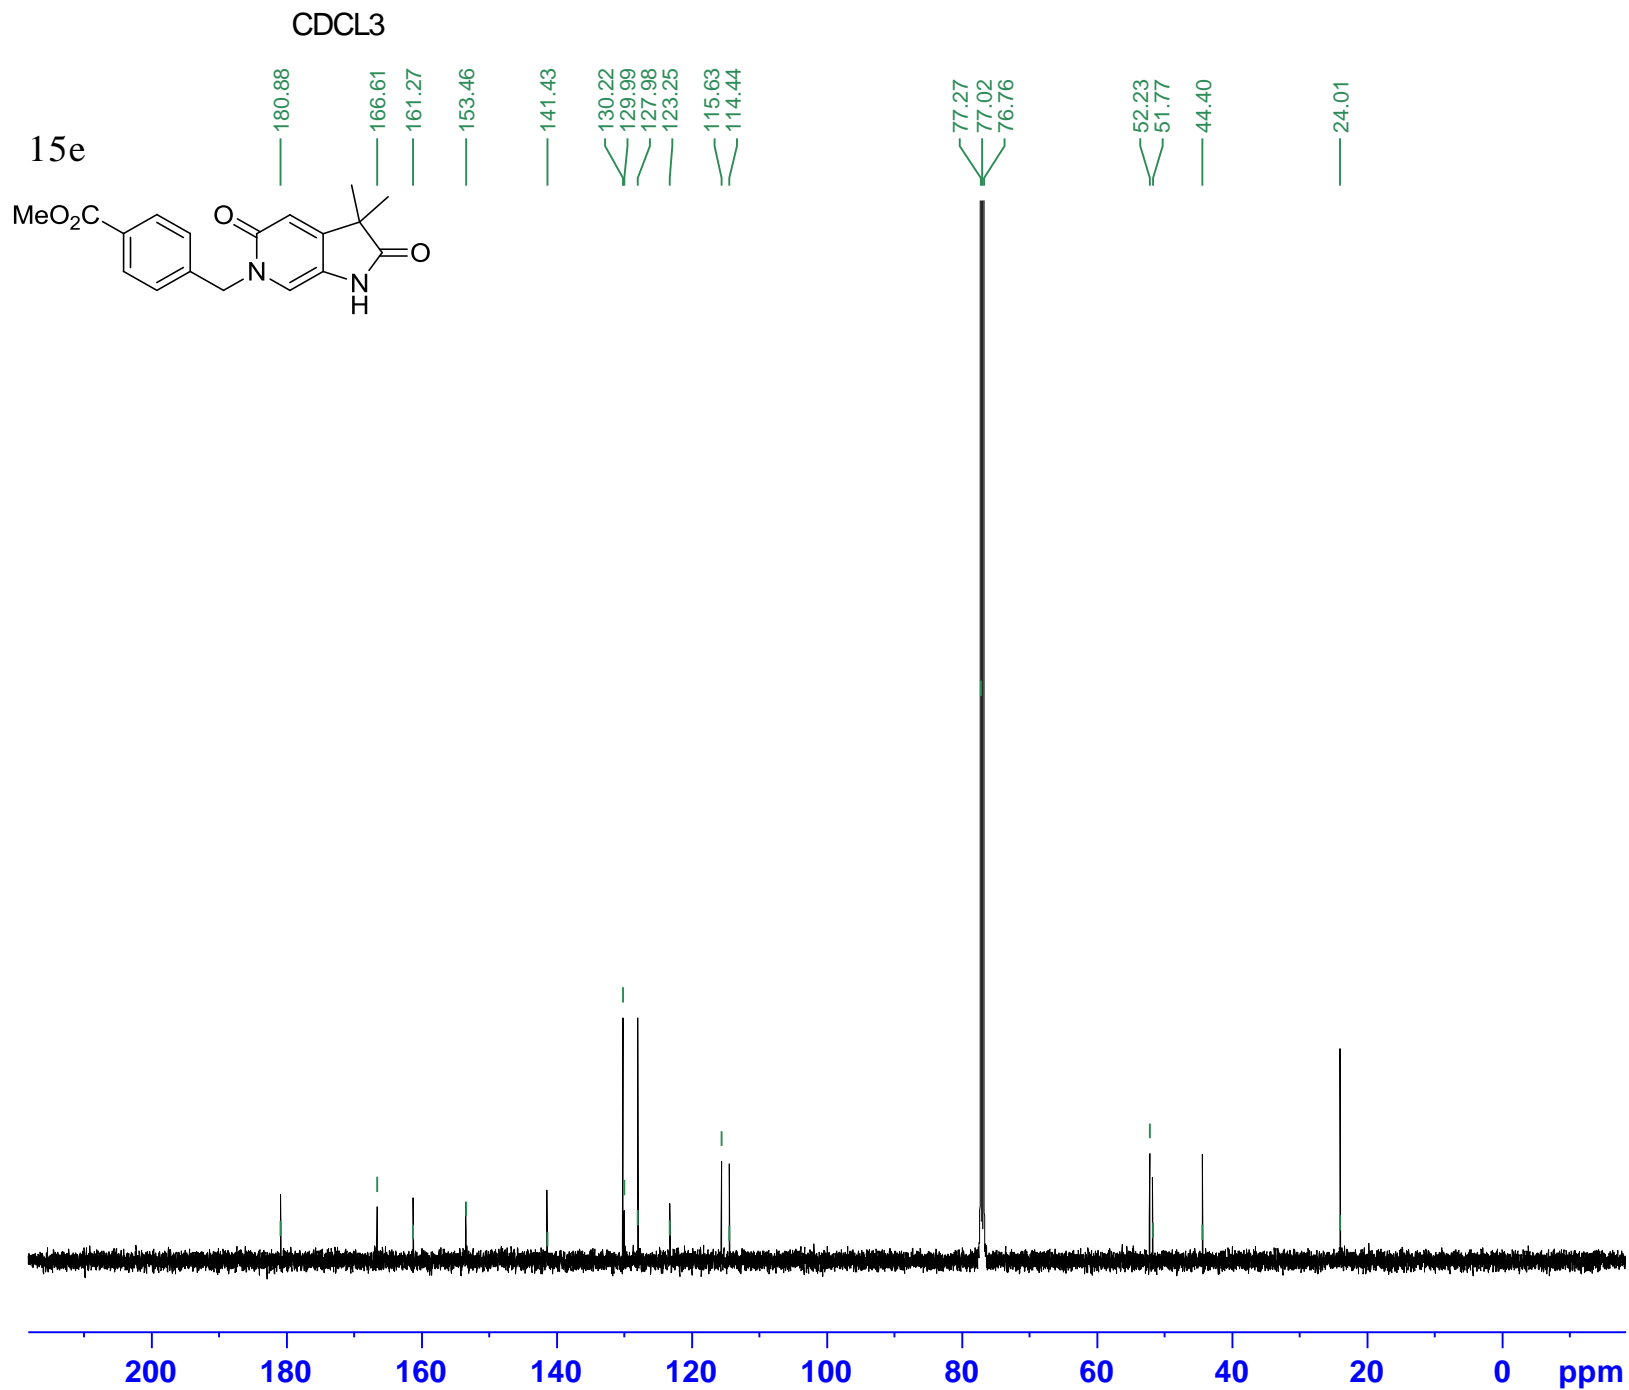

Current Data Parameters  
NAME DCM-494-115-A CDCL<sub>3</sub> CONC  
EXPNO 12  
PROCNO 1

F2 - Acquisition  
Parameters 20141209  
Time 23.02  
INSTRUM spect  
PROBHD 5 mm PABBO BB-  
PULPROG zgpg3  
TD 0  
SOLVENT 6553  
NS 6  
DS CDC13  
SMH 2048  
FIDRES 2  
AQ 29761.904 Hz  
RG 0.454131 Hz  
DW 1.1010048 sec  
DE 575  
TE 16.800 usec  
D1 7.68 usec  
D11 298.0 K  
TD0 2.00000000 sec  
0.03000000 sec

==== CHANNEL f1 =====  
SFO1 125.8131151 MHz  
NUC1 13C  
P1 9.75 usec  
PLW1 82.38999939 W

==== CHANNEL f2 =====  
SFO2 500.3020012 MHz  
NUC2 1H  
CPDPRG2 waltz16  
PCPD2 80.00 usec  
PLW2 18.33600044 W  
PLW12 0.75654000 W  
PLW13 0.48418999 W

F2 - Processing  
Parameters 65536  
SF 125.8005350 MHz  
VDW EM  
SSB 0  
LB 1.00 Hz  
GB 0  
PC 1.40



10 1

15g

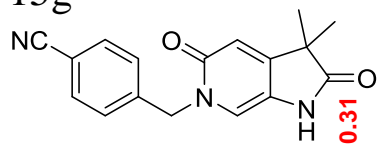

-10.31

7.86  
7.84  
7.49  
7.47  
7.28

-6.60

-5.17

-3.40

2.55  
2.54  
2.54  
2.53

-1.29

0.99

1.97  
2.01  
0.96

0.97

2.00

6.08

15.12

6.26

12

10

8

6

4

2

0

[ppm]

[rel]

80

60

40

20

0

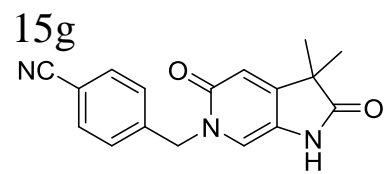

12 1 "V:\Old Server\DCM\nmr"

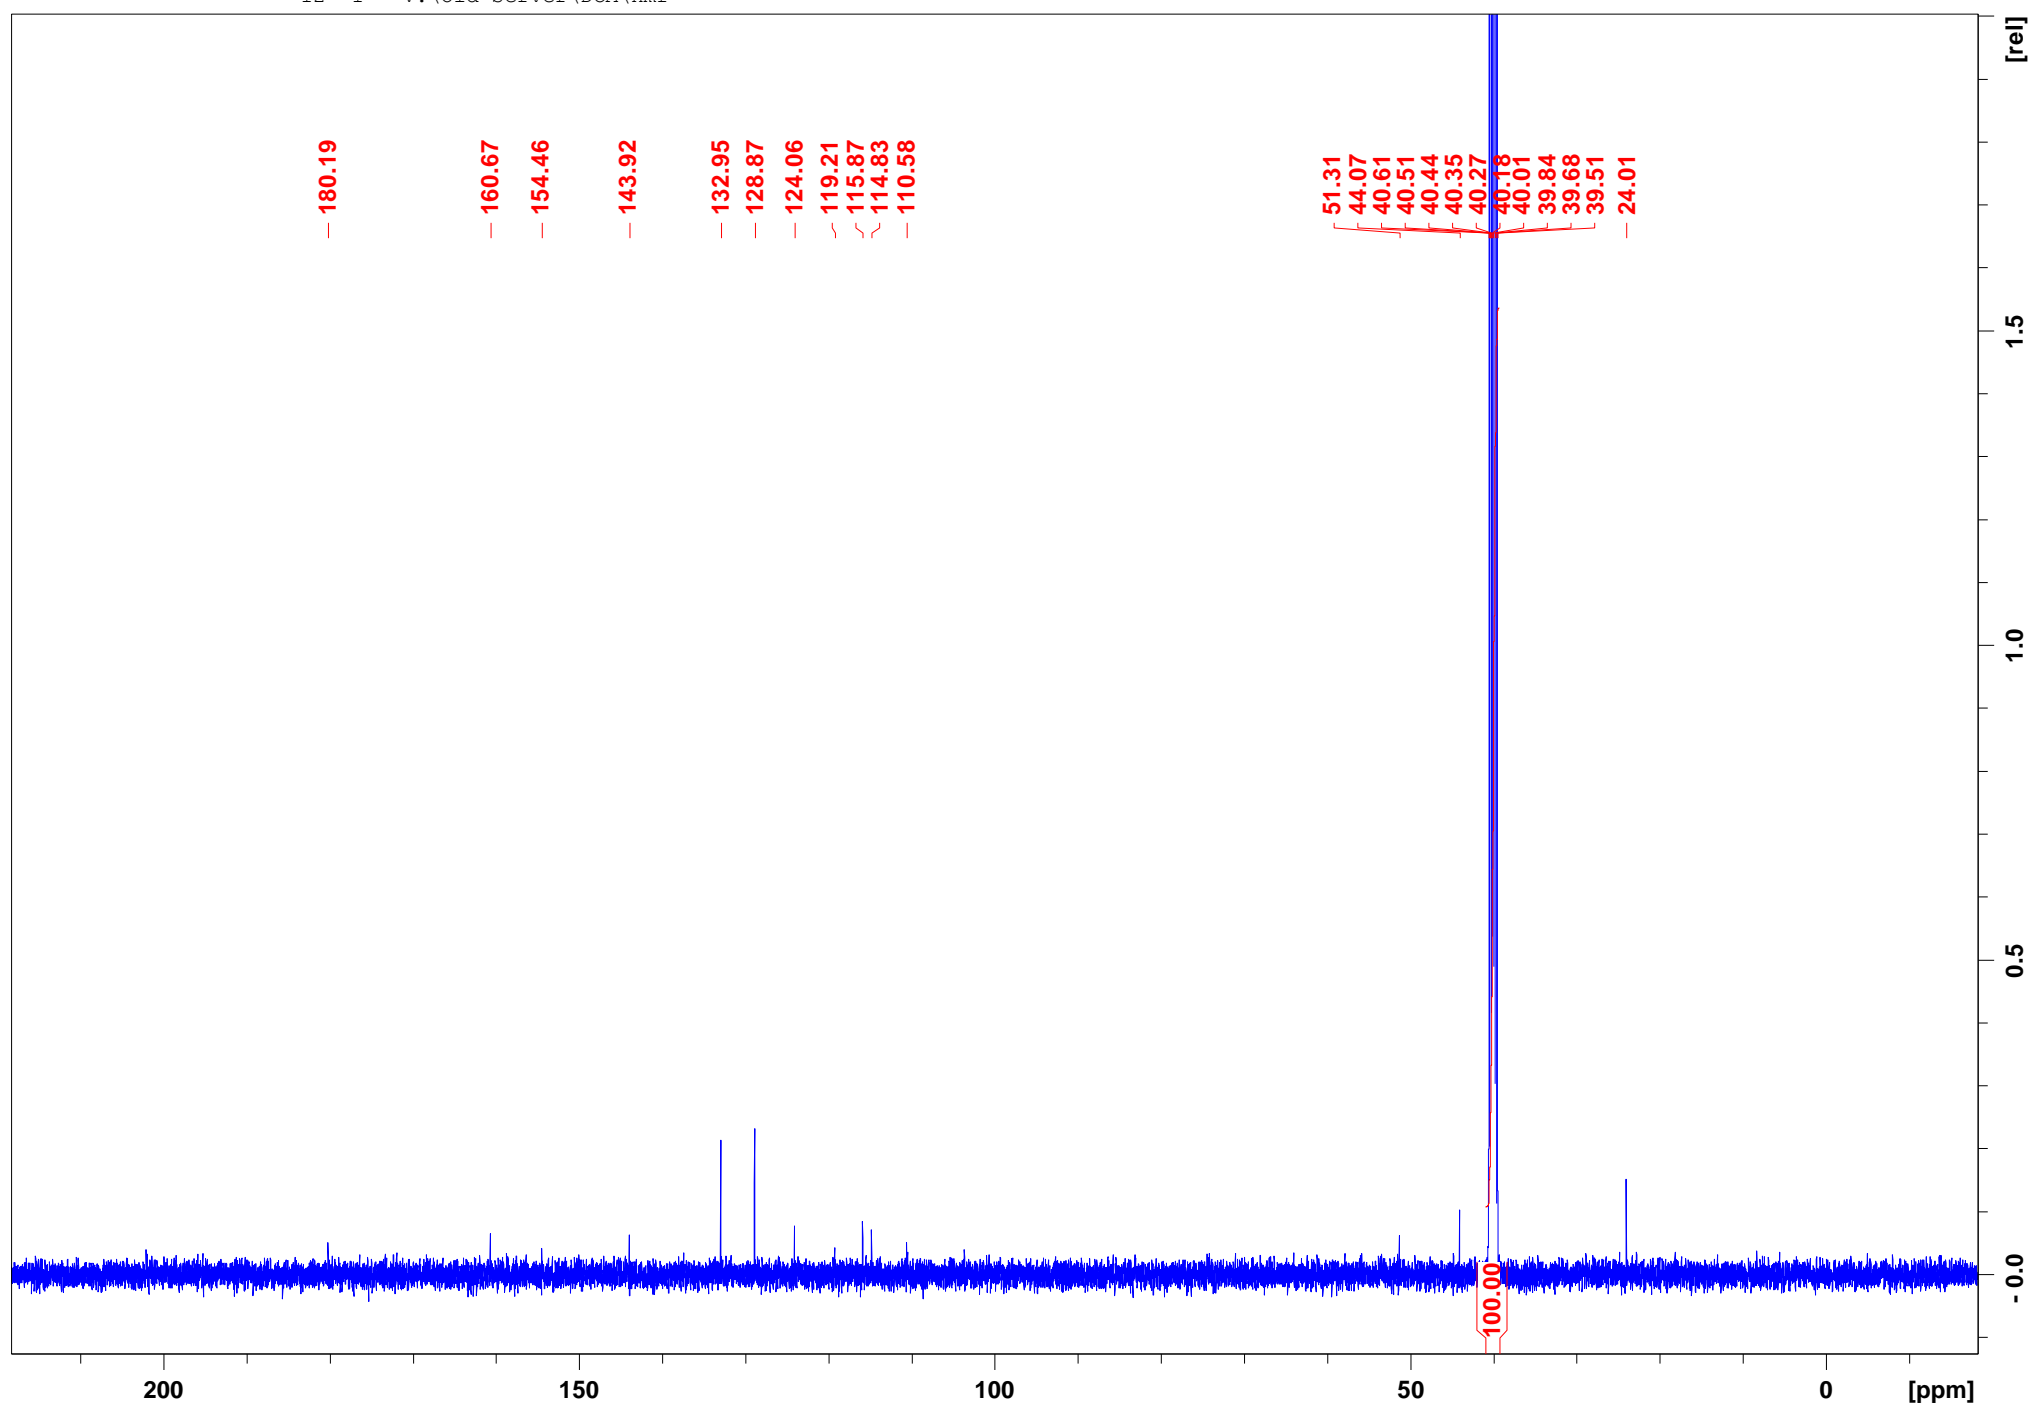

15i

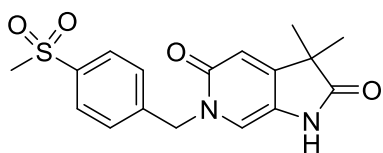

20 1 "V:\Old Server\SA\nmr"

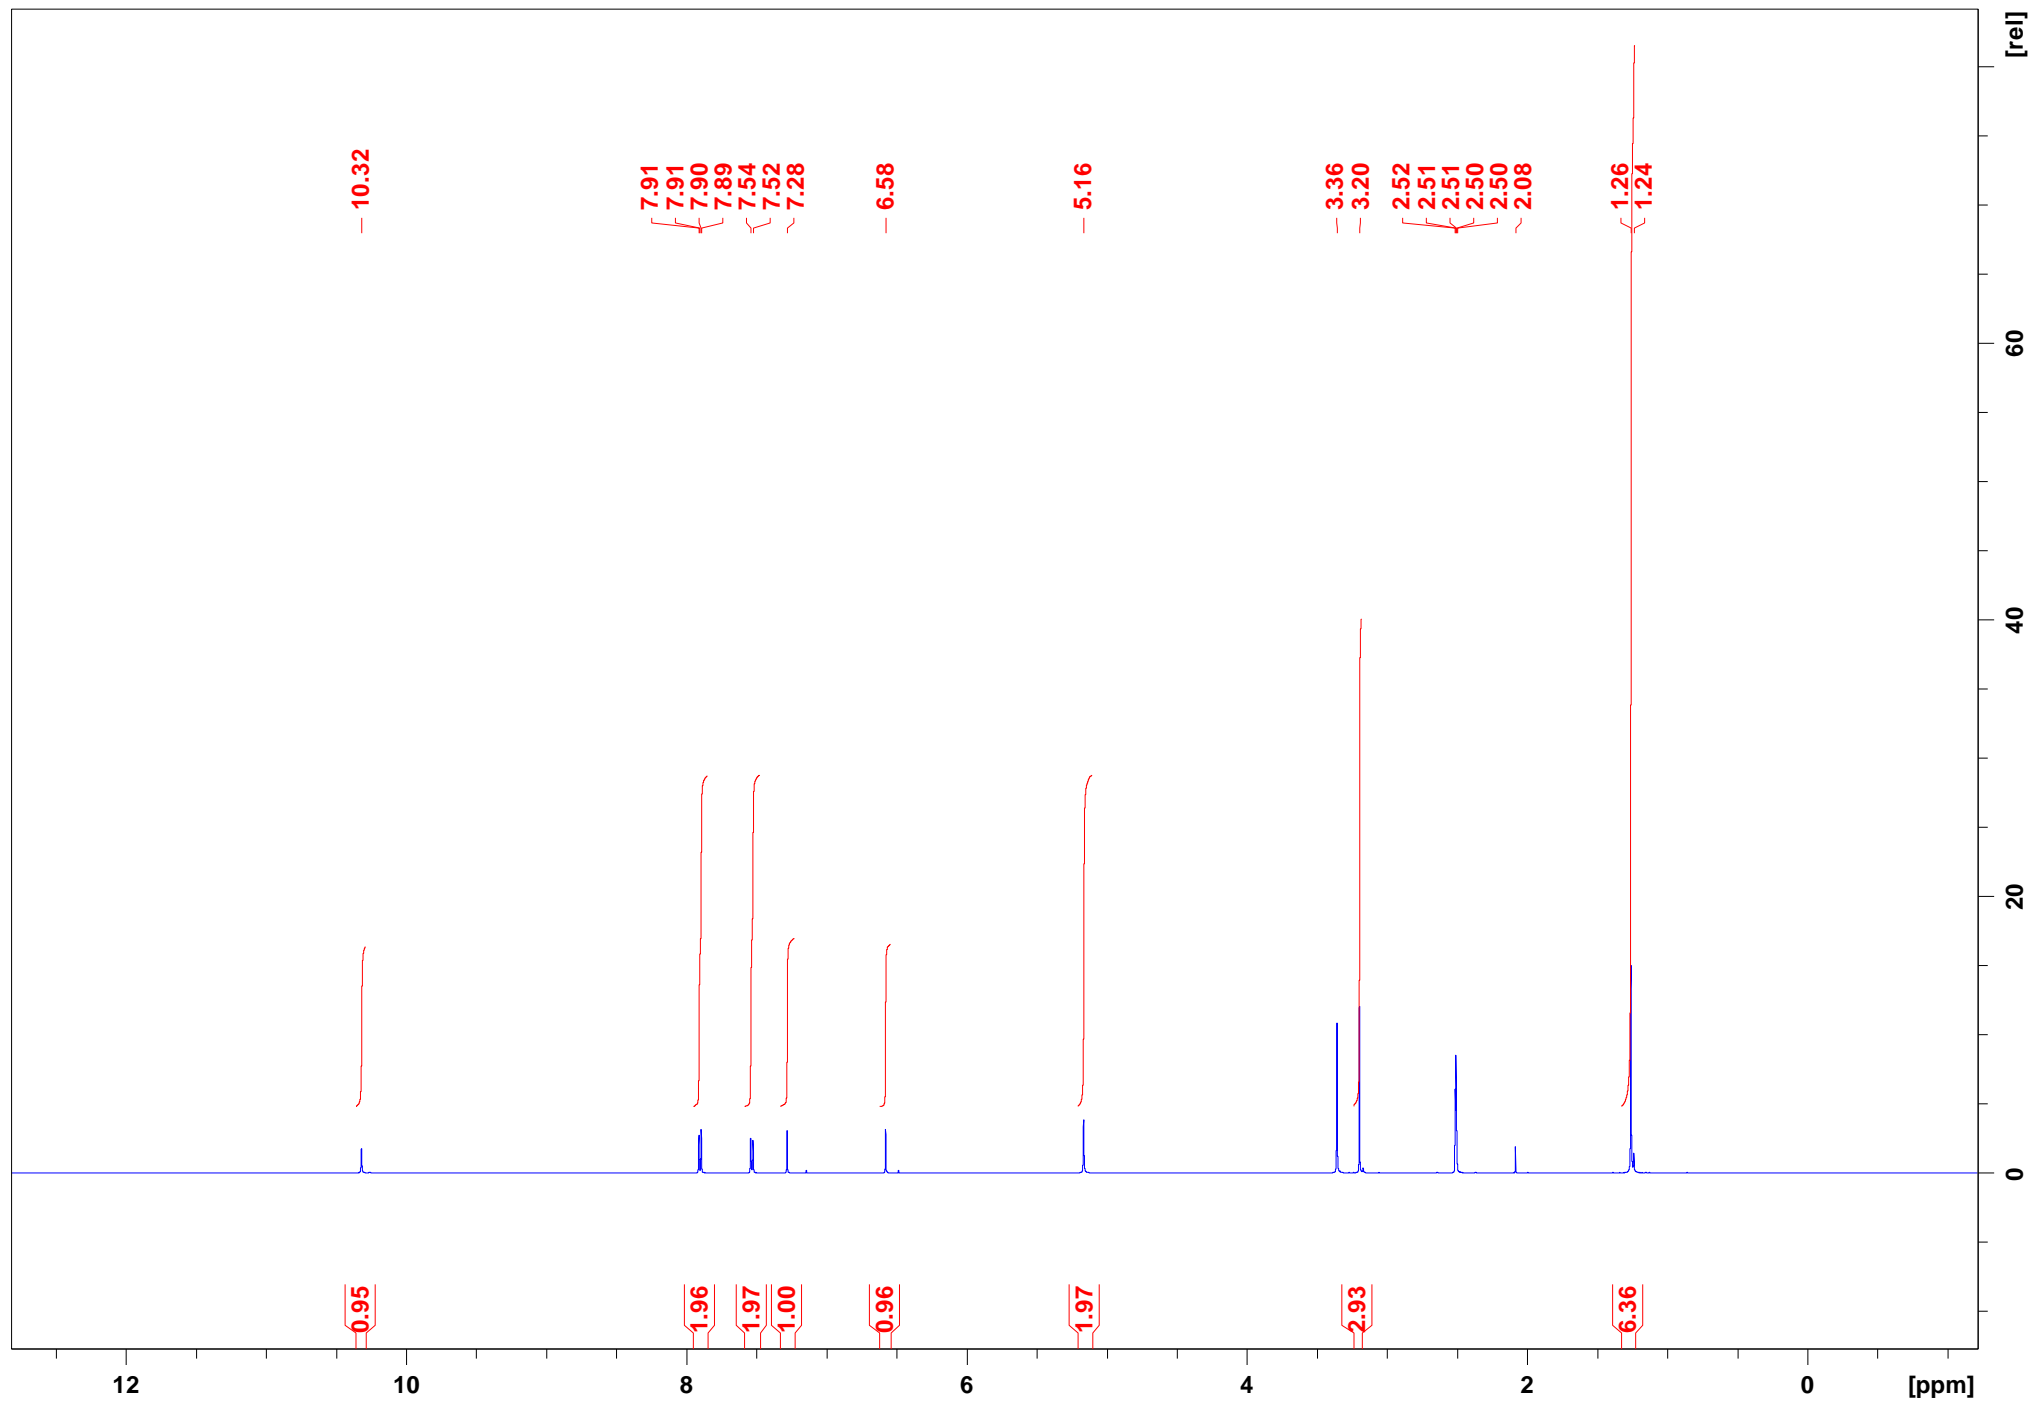

15i

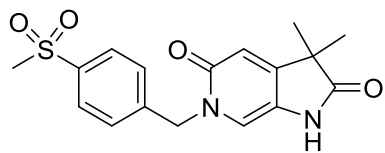

"V:\Old Server\SA\nmr"

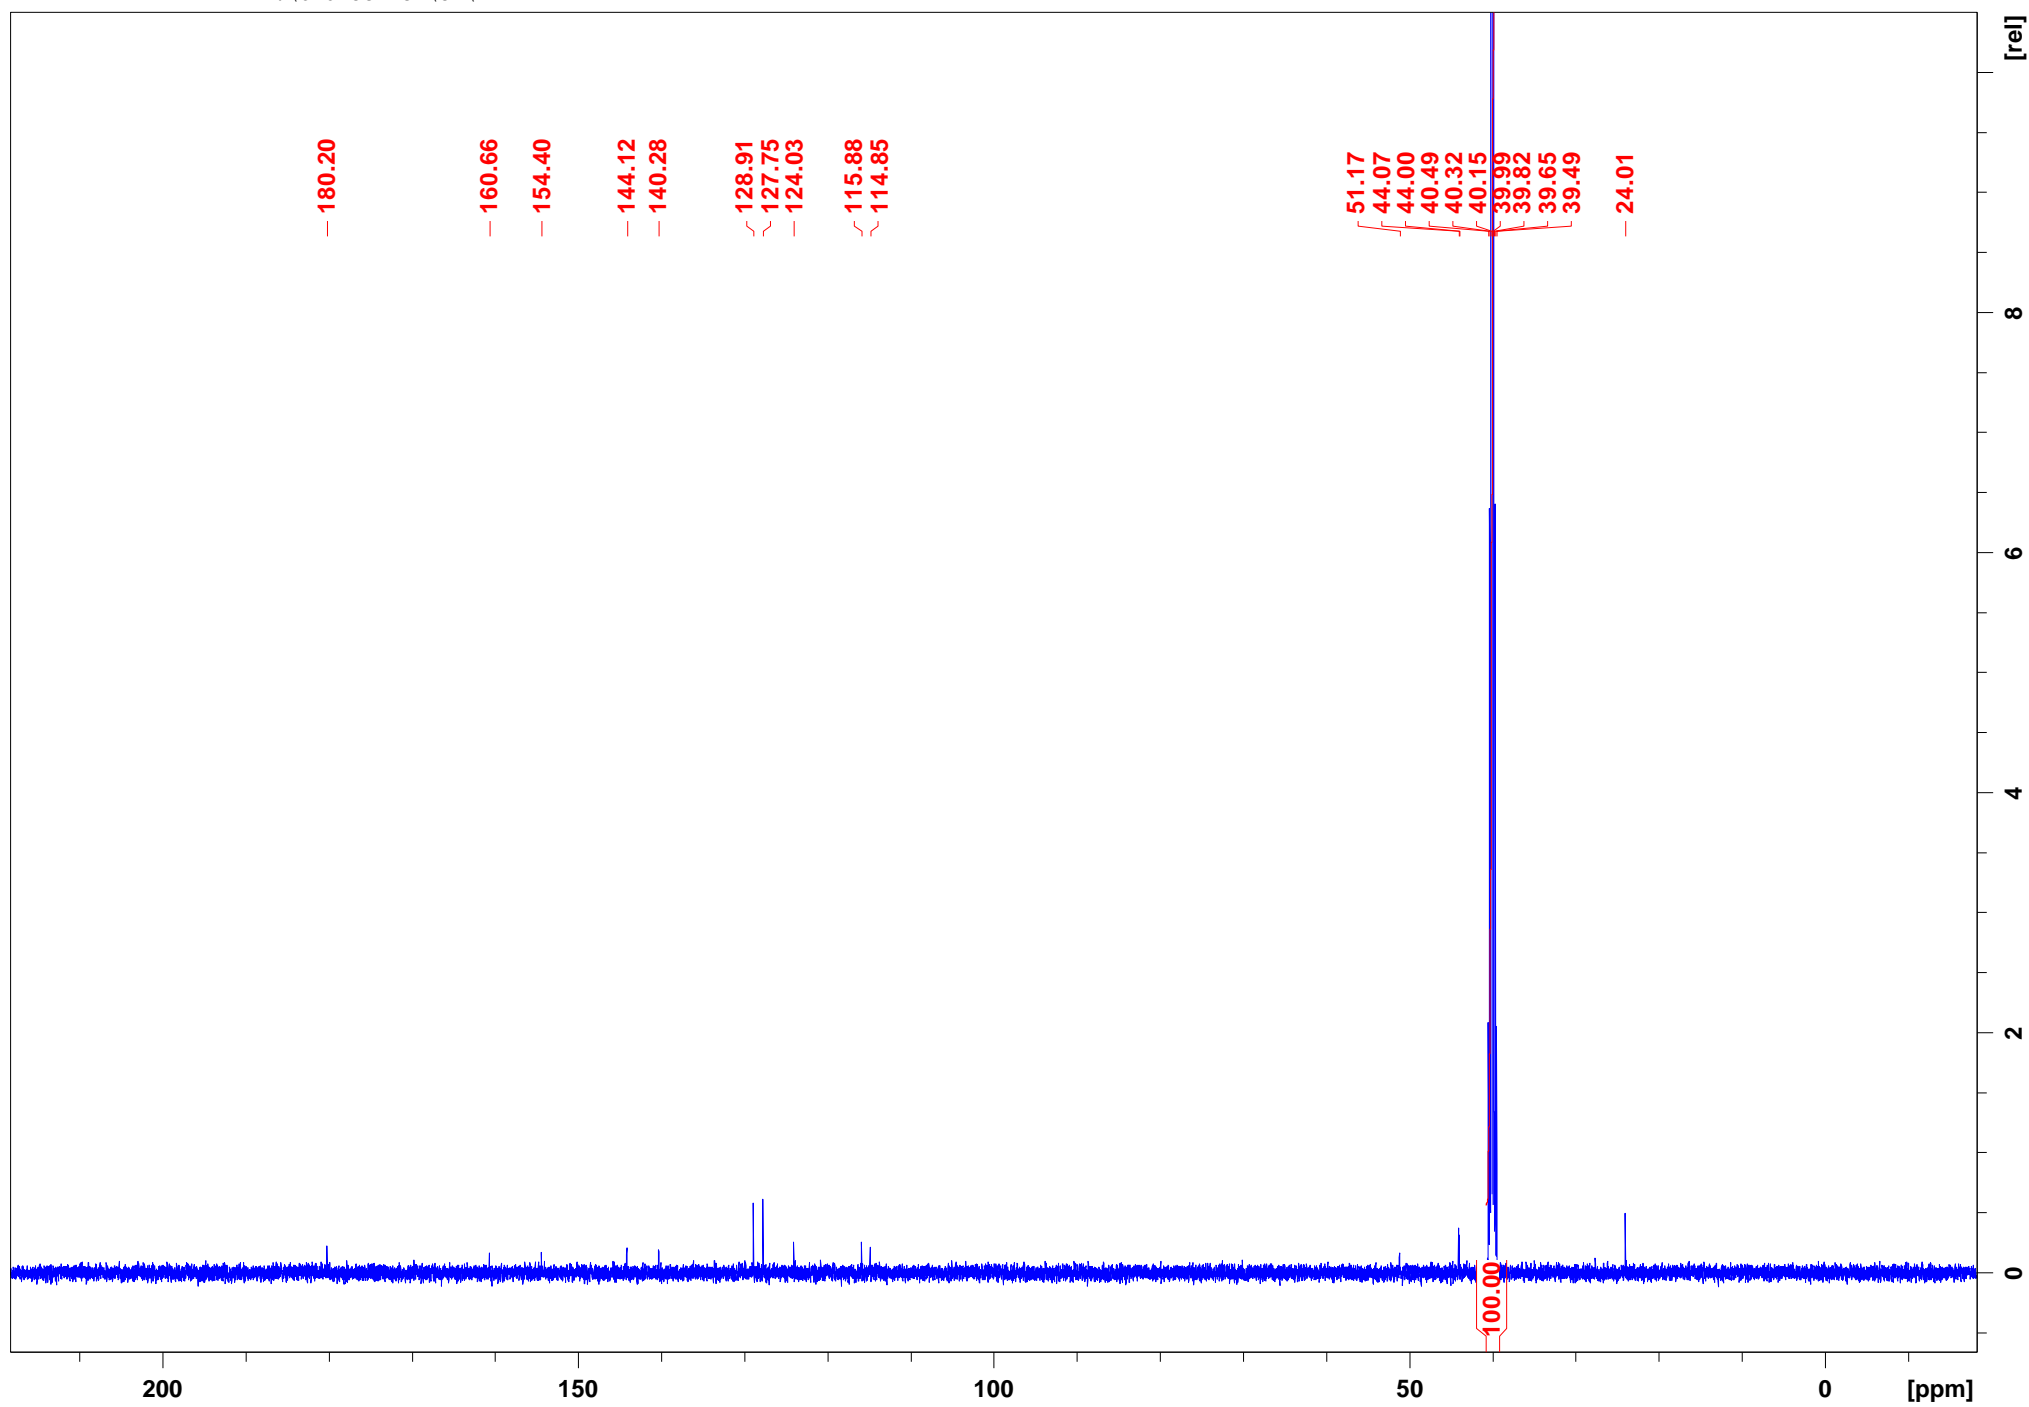

15j

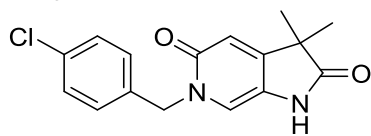7.318  
7.2446.506  
6.5065.064  
4.8053.215  
3.212  
3.209  
3.205  
3.202  
3.019

1.261



Current Data  
 NAME SA-500-42  
 EXPNO 10  
 PROCNO 1

F2 - Acquisition  
 Parameters 20150122  
 Time 17.08  
 INSTRUM spect  
 PROBHD 5 mm PABBO BB-  
 PULPROG zg30  
 TD 65536  
 SOLVENT MeOD  
 NS 16  
 DS 0  
 SWH 10330.578 Hz  
 FIDRES 0.157632 Hz  
 AQ 3.1719425 sec  
 RG 456  
 DW 48.400 usec  
 DE 11.99 usec  
 TE 292.6 K  
 D1 1.00000000 sec  
 TDO 1

==== CHANNEL f1 =====  
 SFO1 500.3030896 MHz  
 NUC1 1H  
 P1 16.25 usec  
 PLW1 18.33600044 W

F2 - Processing parameters SI  
 65536  
 SF 500.3000605 MHz  
 WDW EM  
 SSB 0  
 LB 0.30 Hz  
 GB 0  
 PC 1.00

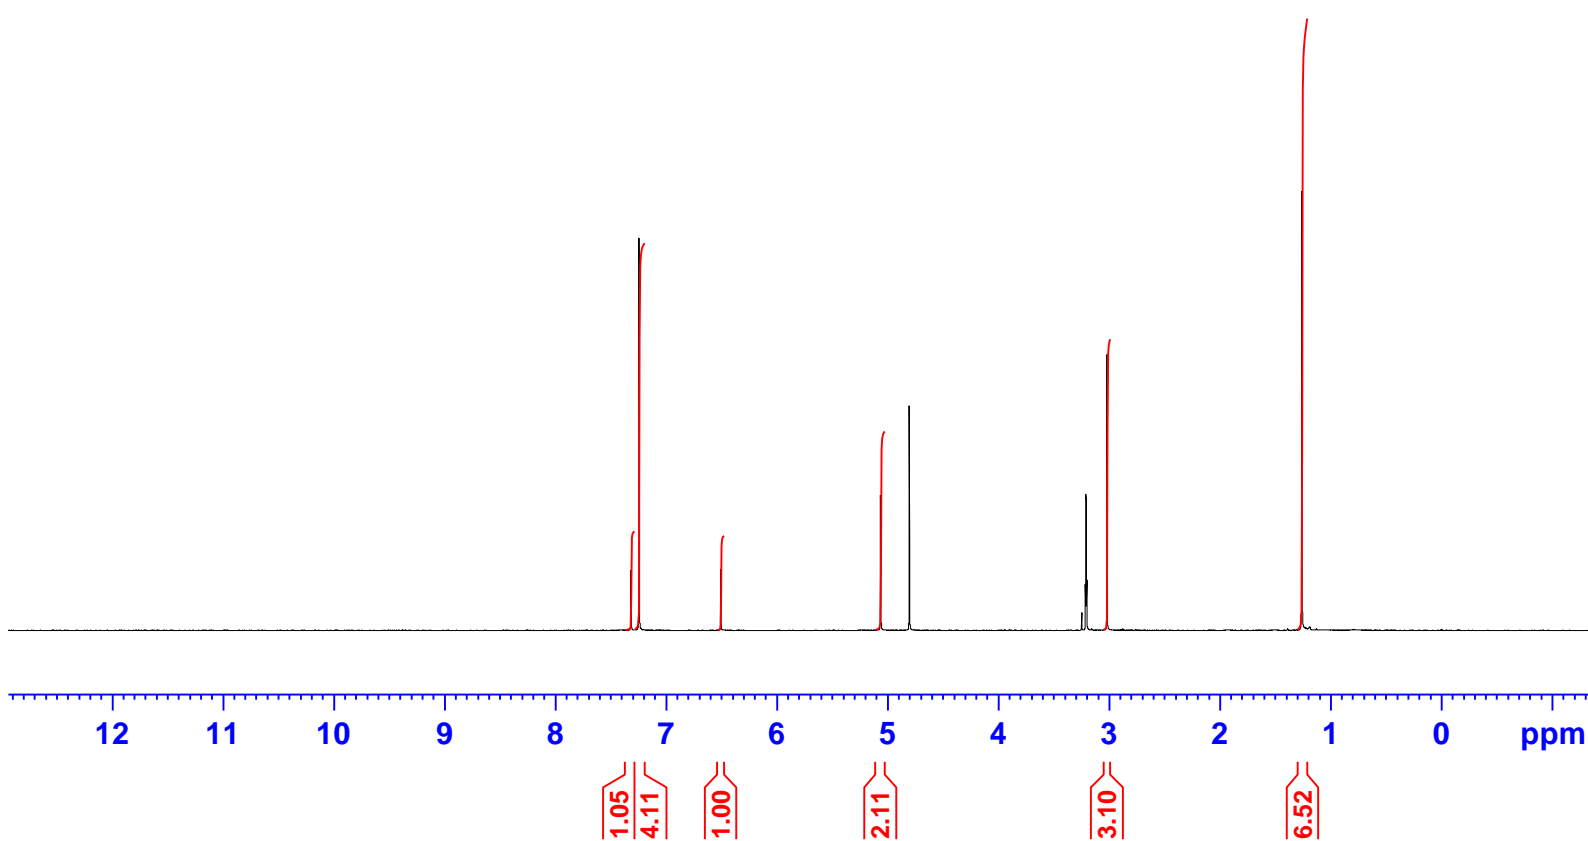

15j

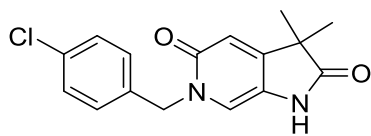

1 "V:\Old Server\SA\nmr"

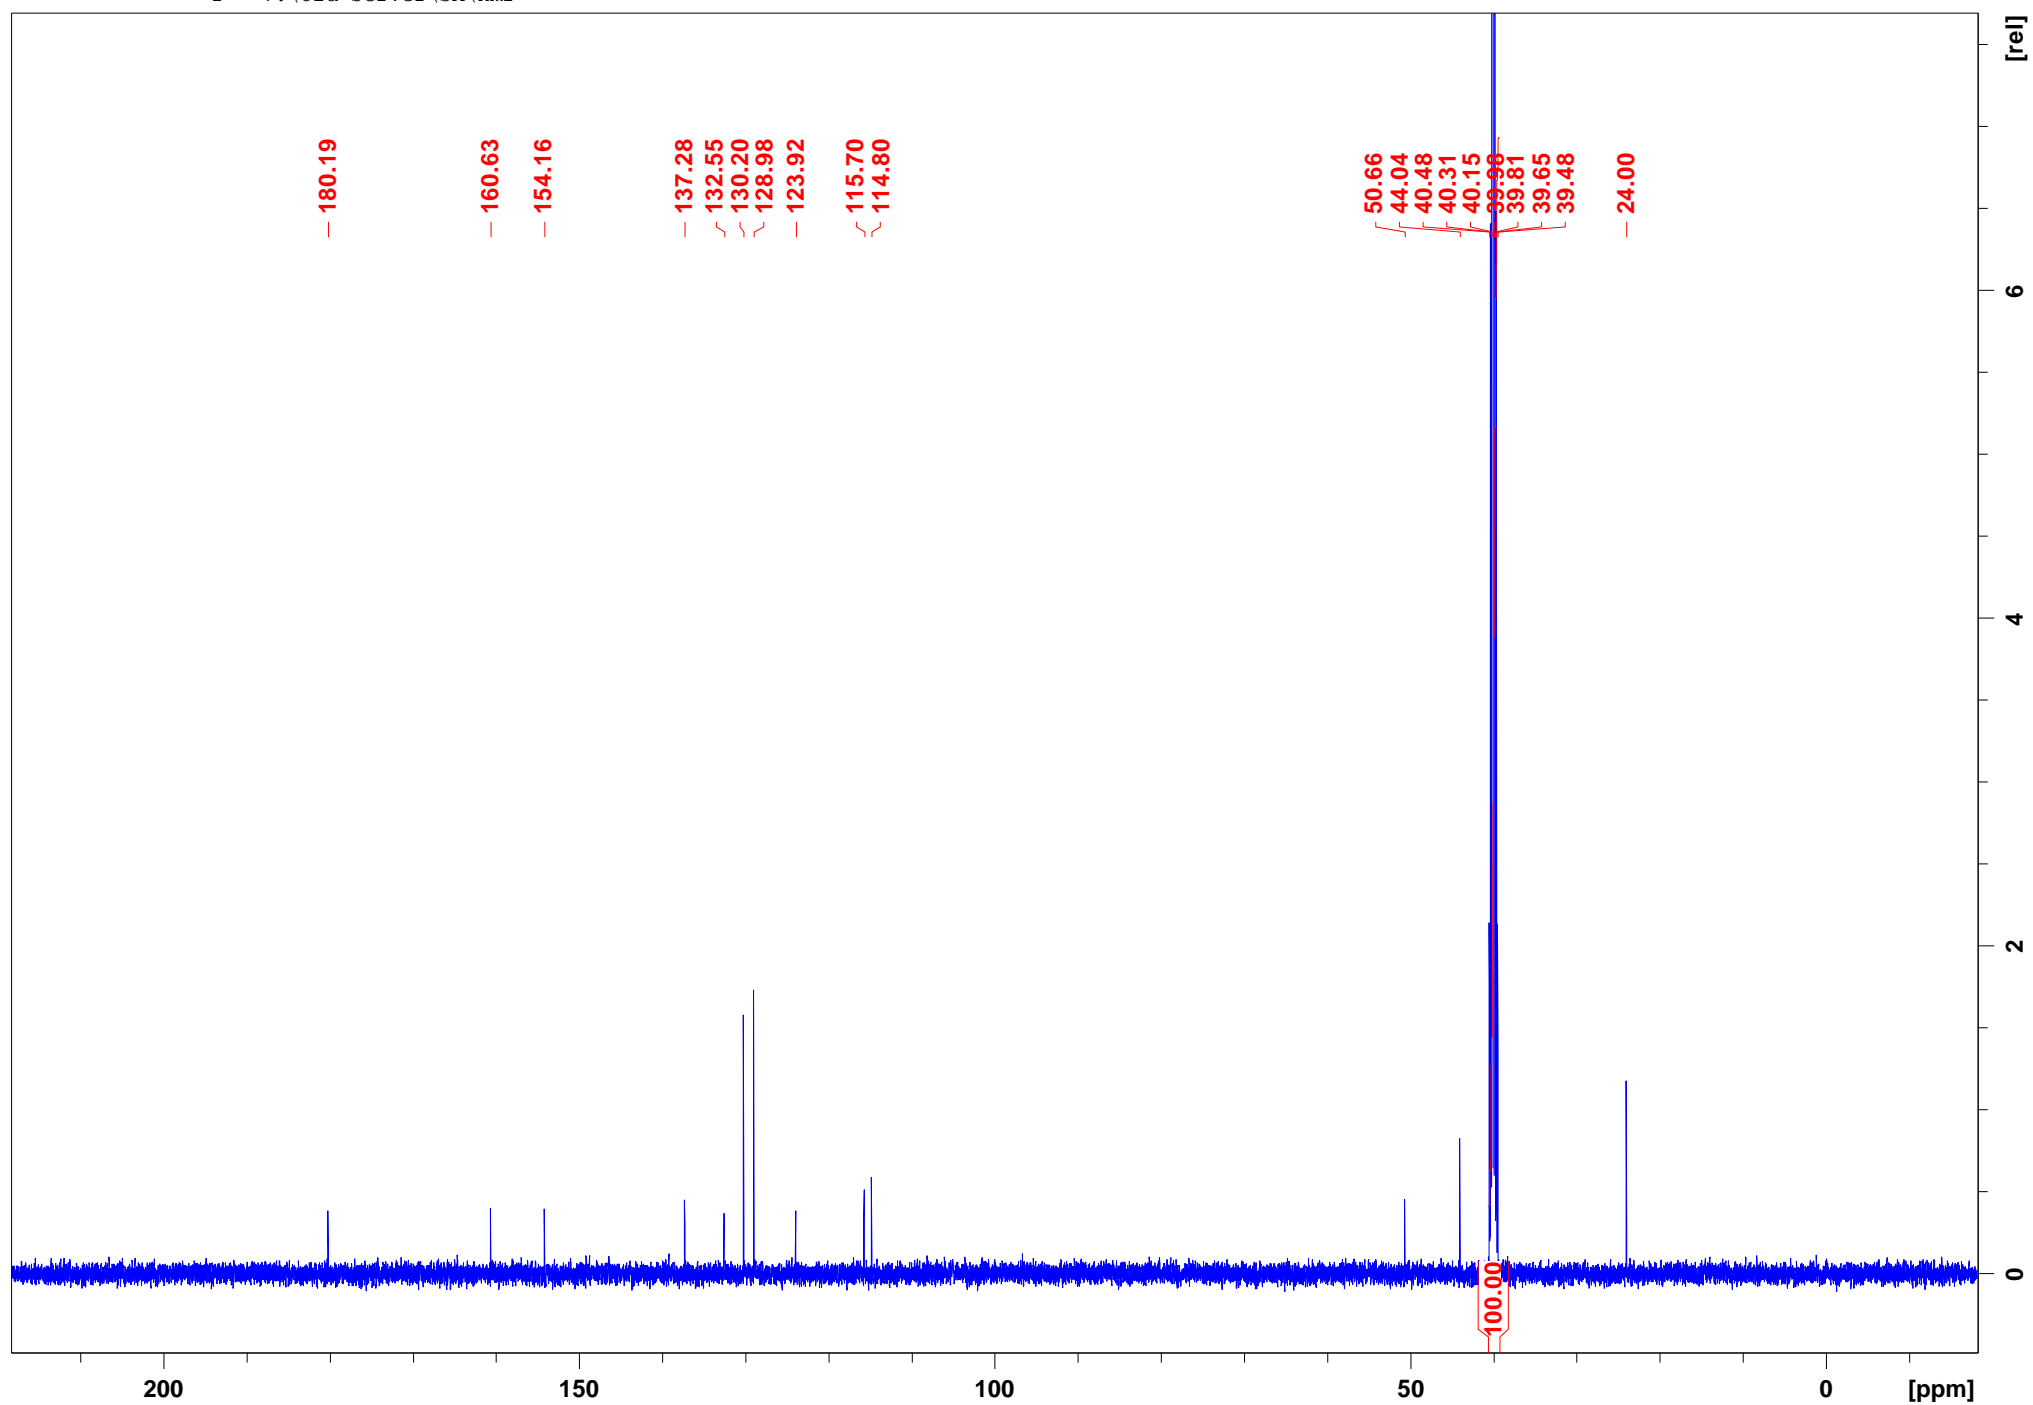

15k

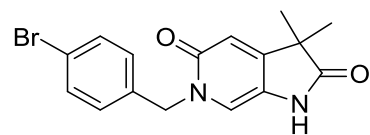

10 1 "V:\Old Server\SA\nmr"

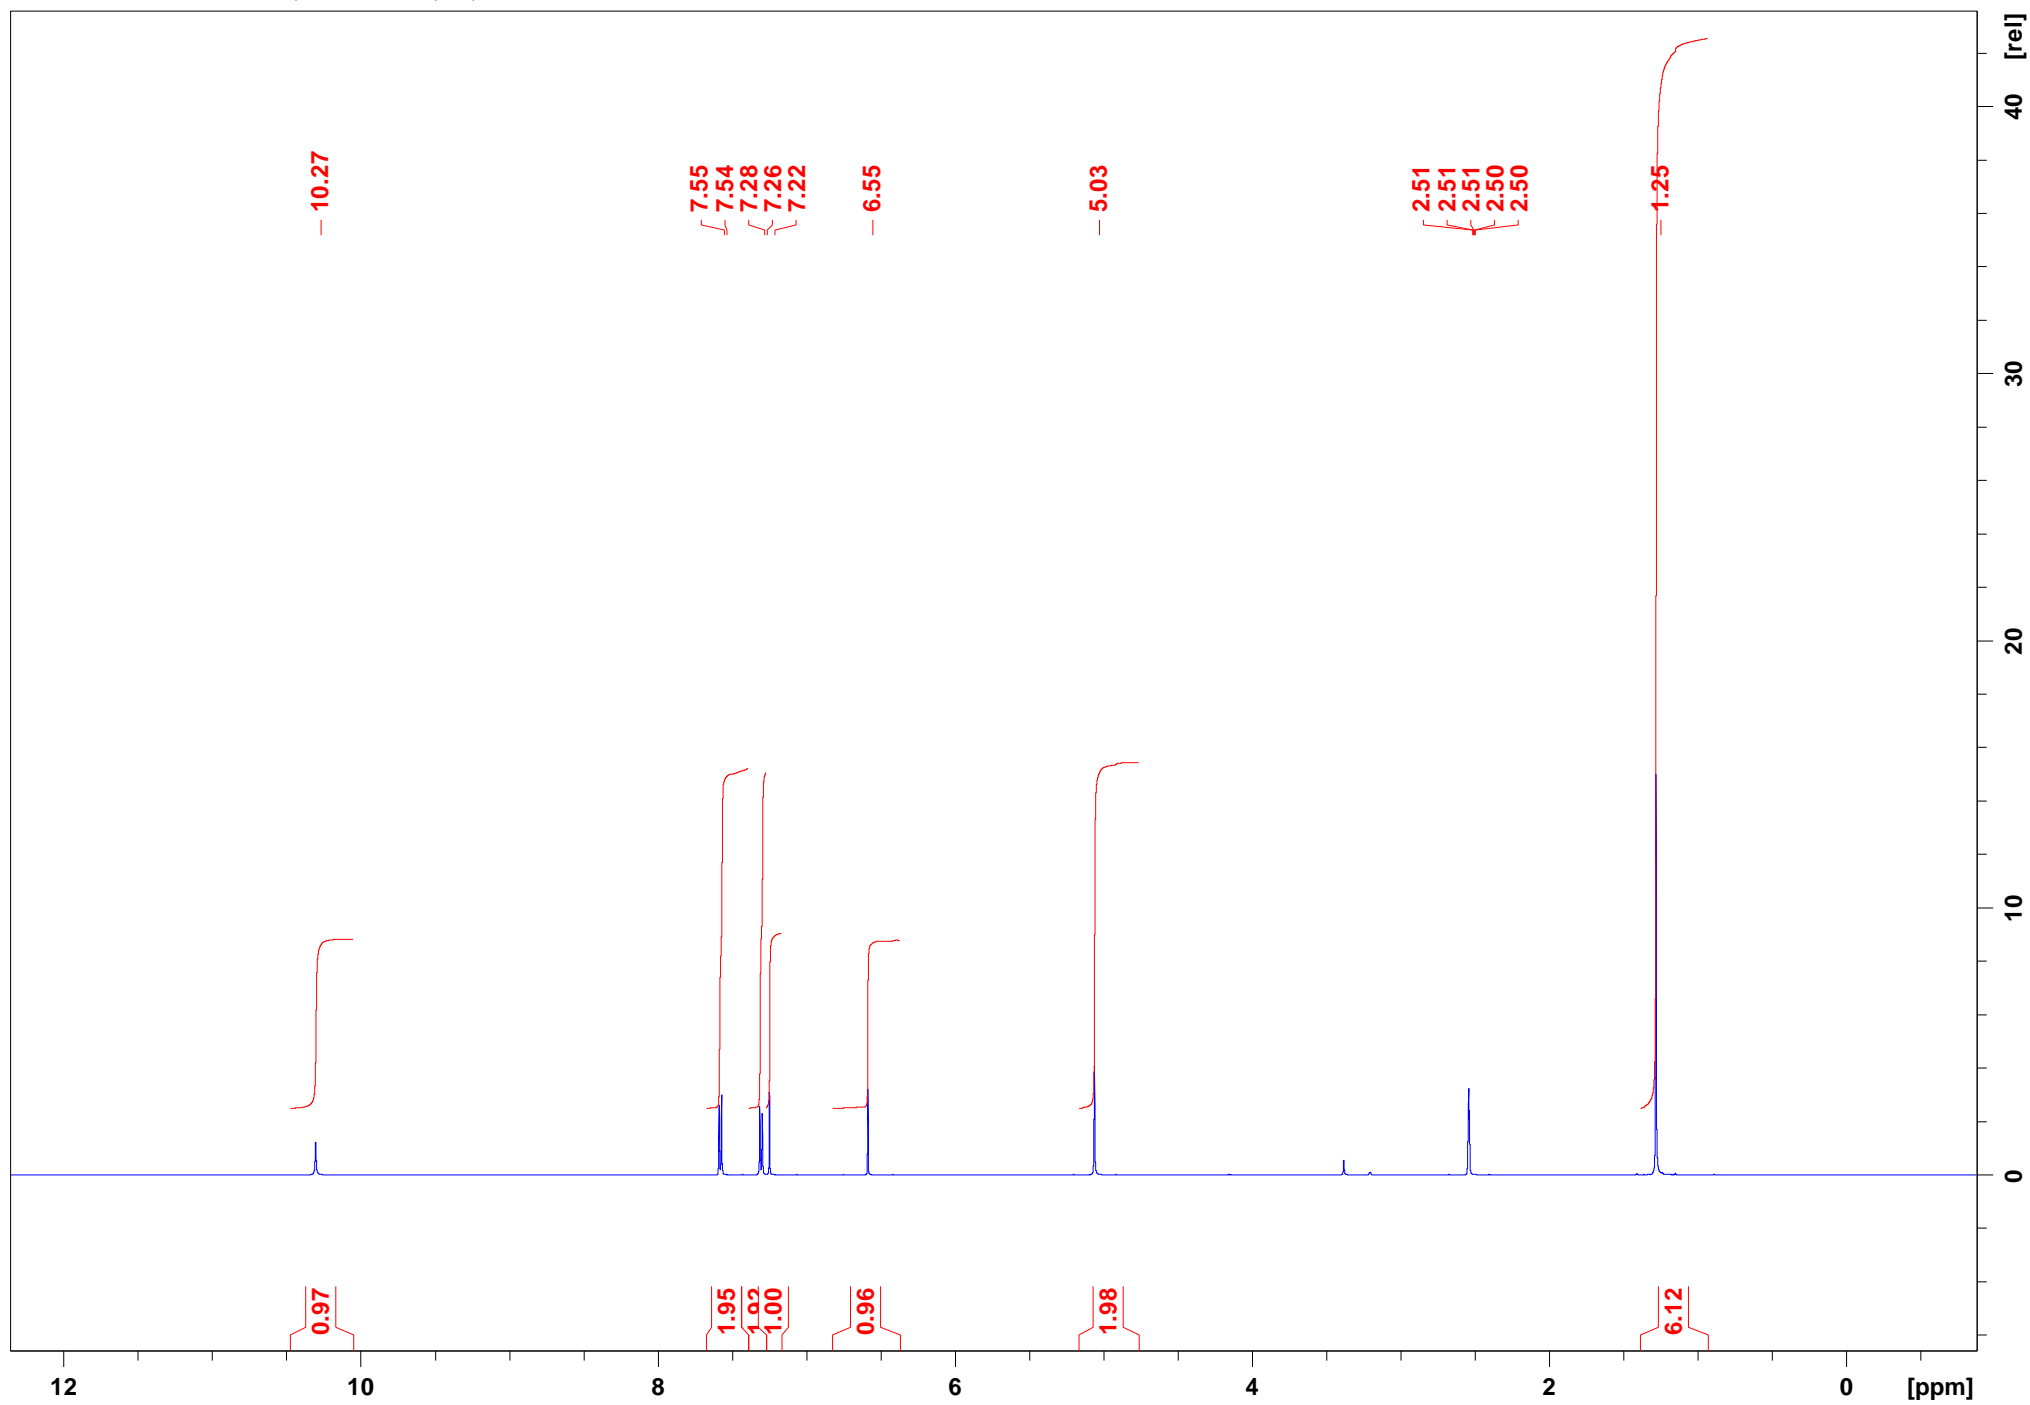

15k

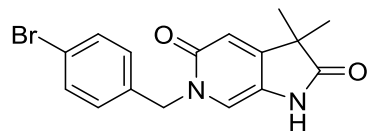

"V:\Old Server\SA\nmr"

1

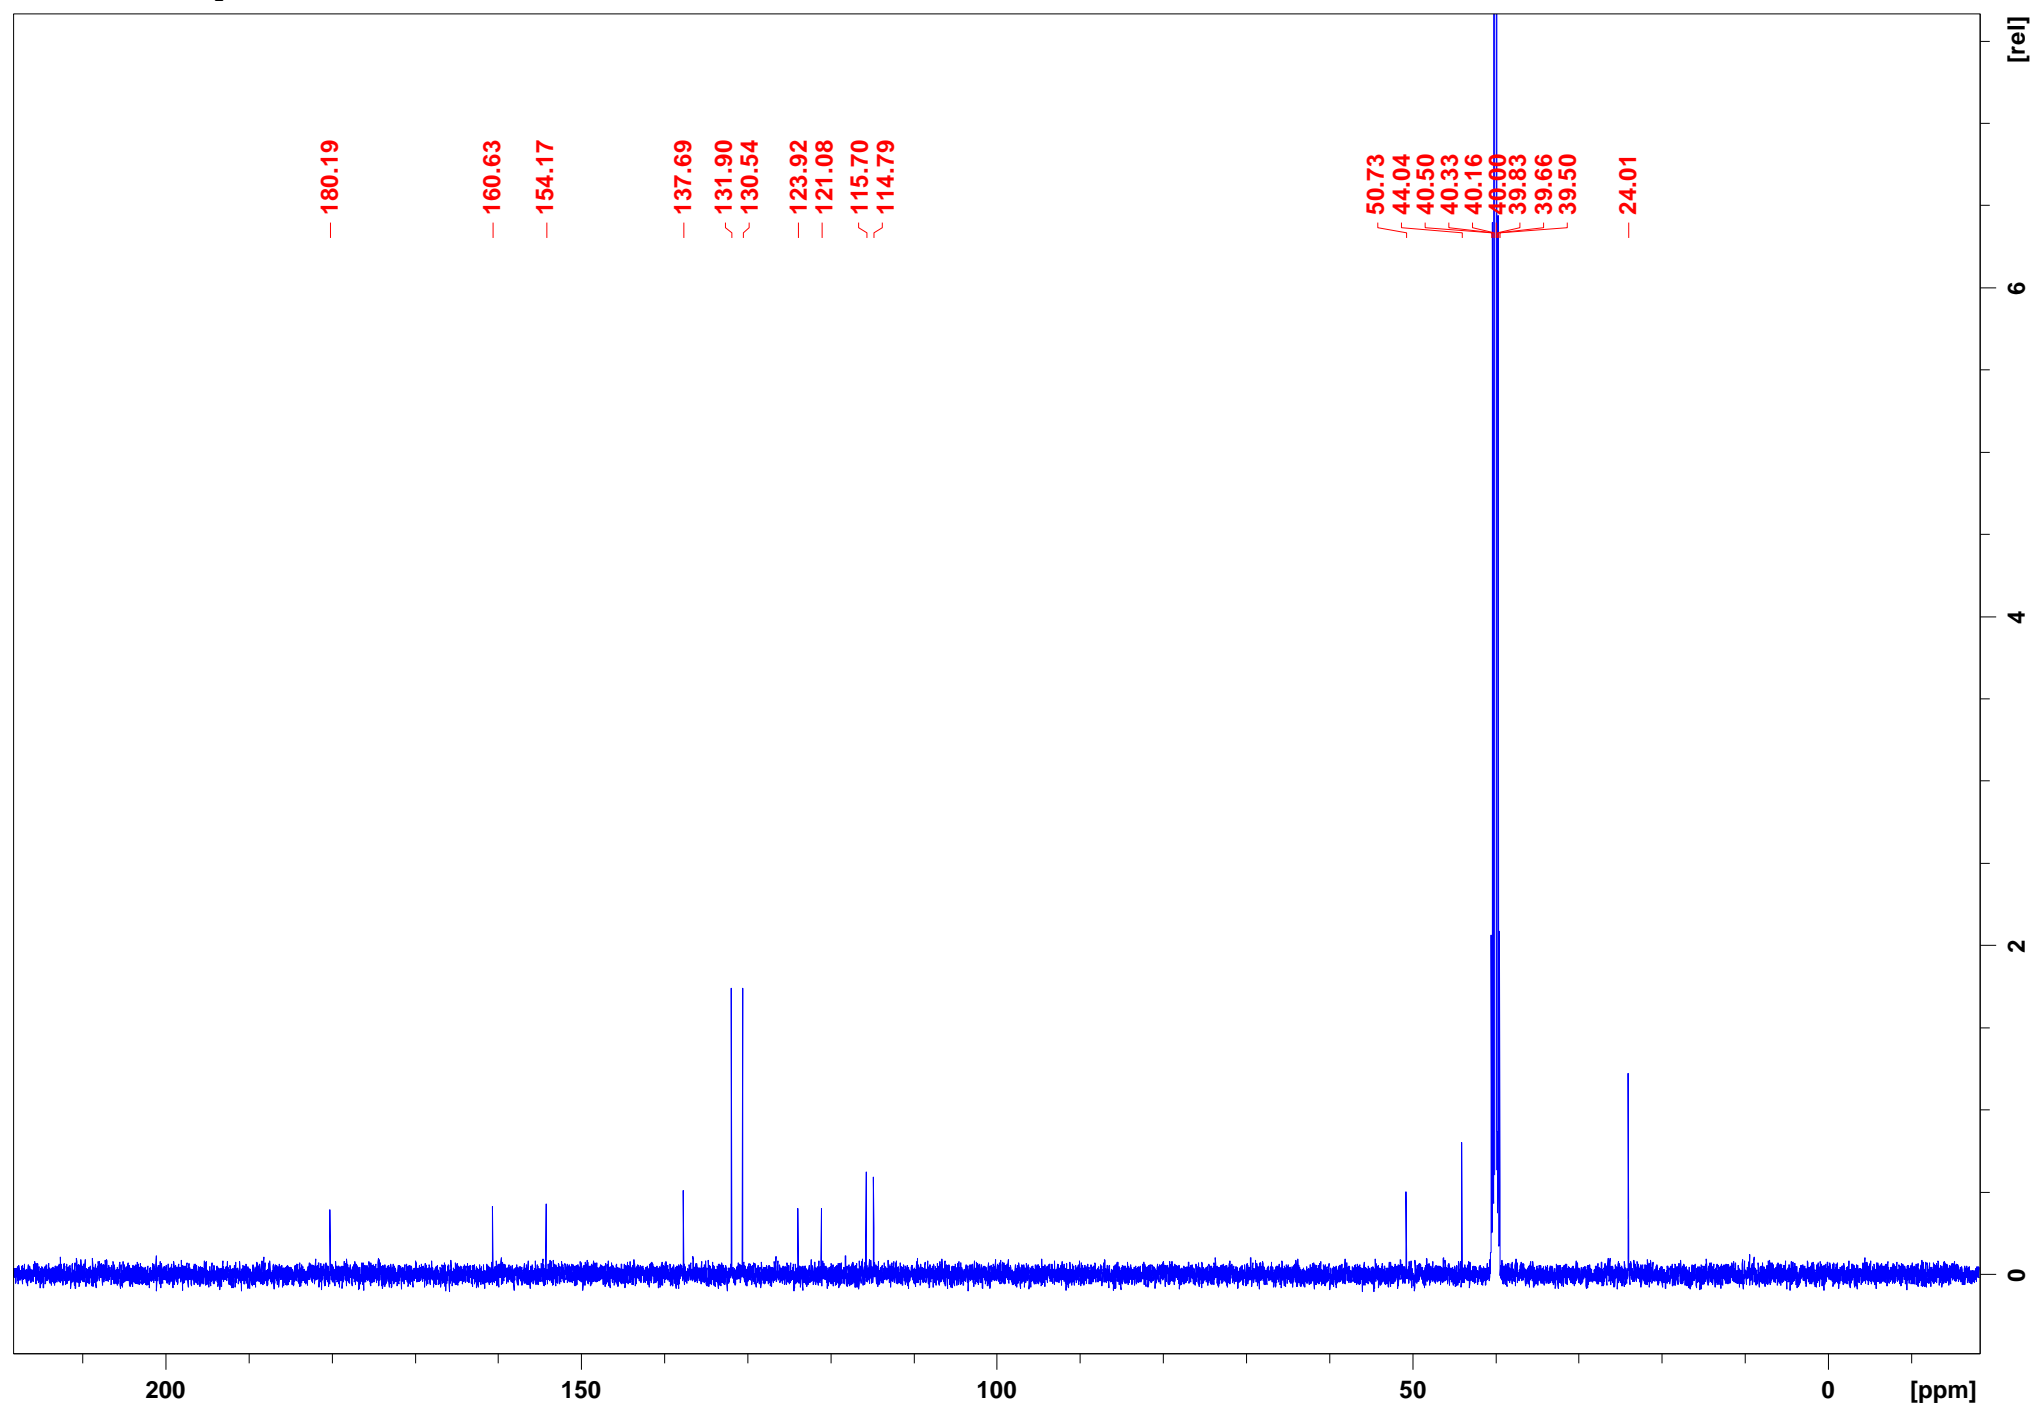



151

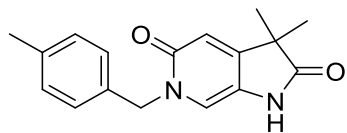

SA-500-72 10 1 "v:\Old Server\SA\nmr"

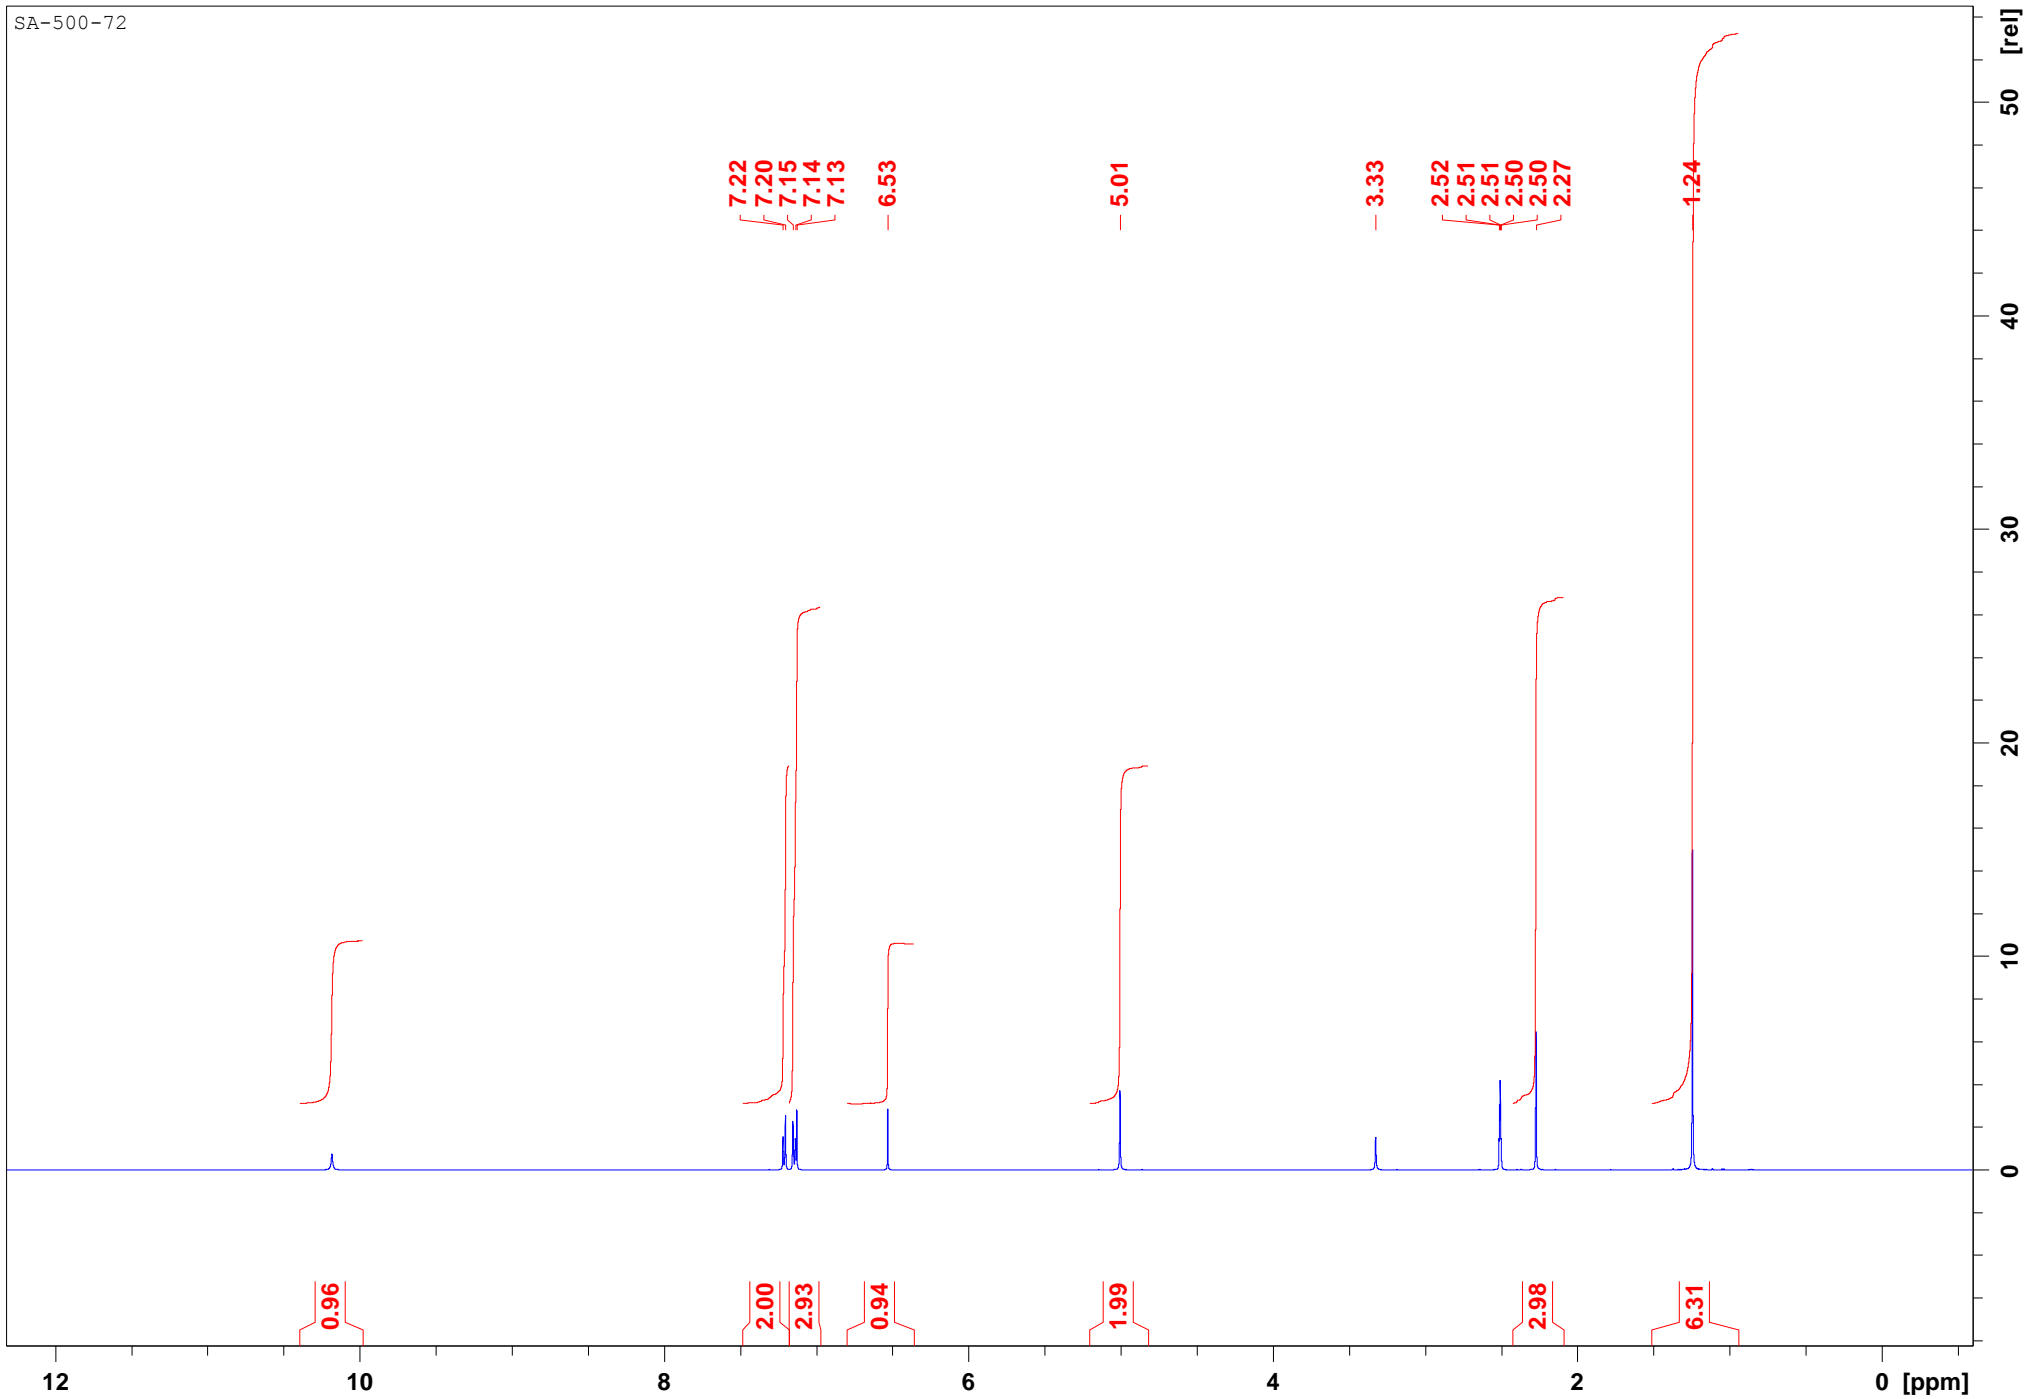

151

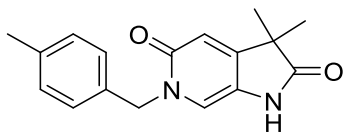

SA-500-72 11 1 "v:\Old Server\SA\nmr"

SA-500-72

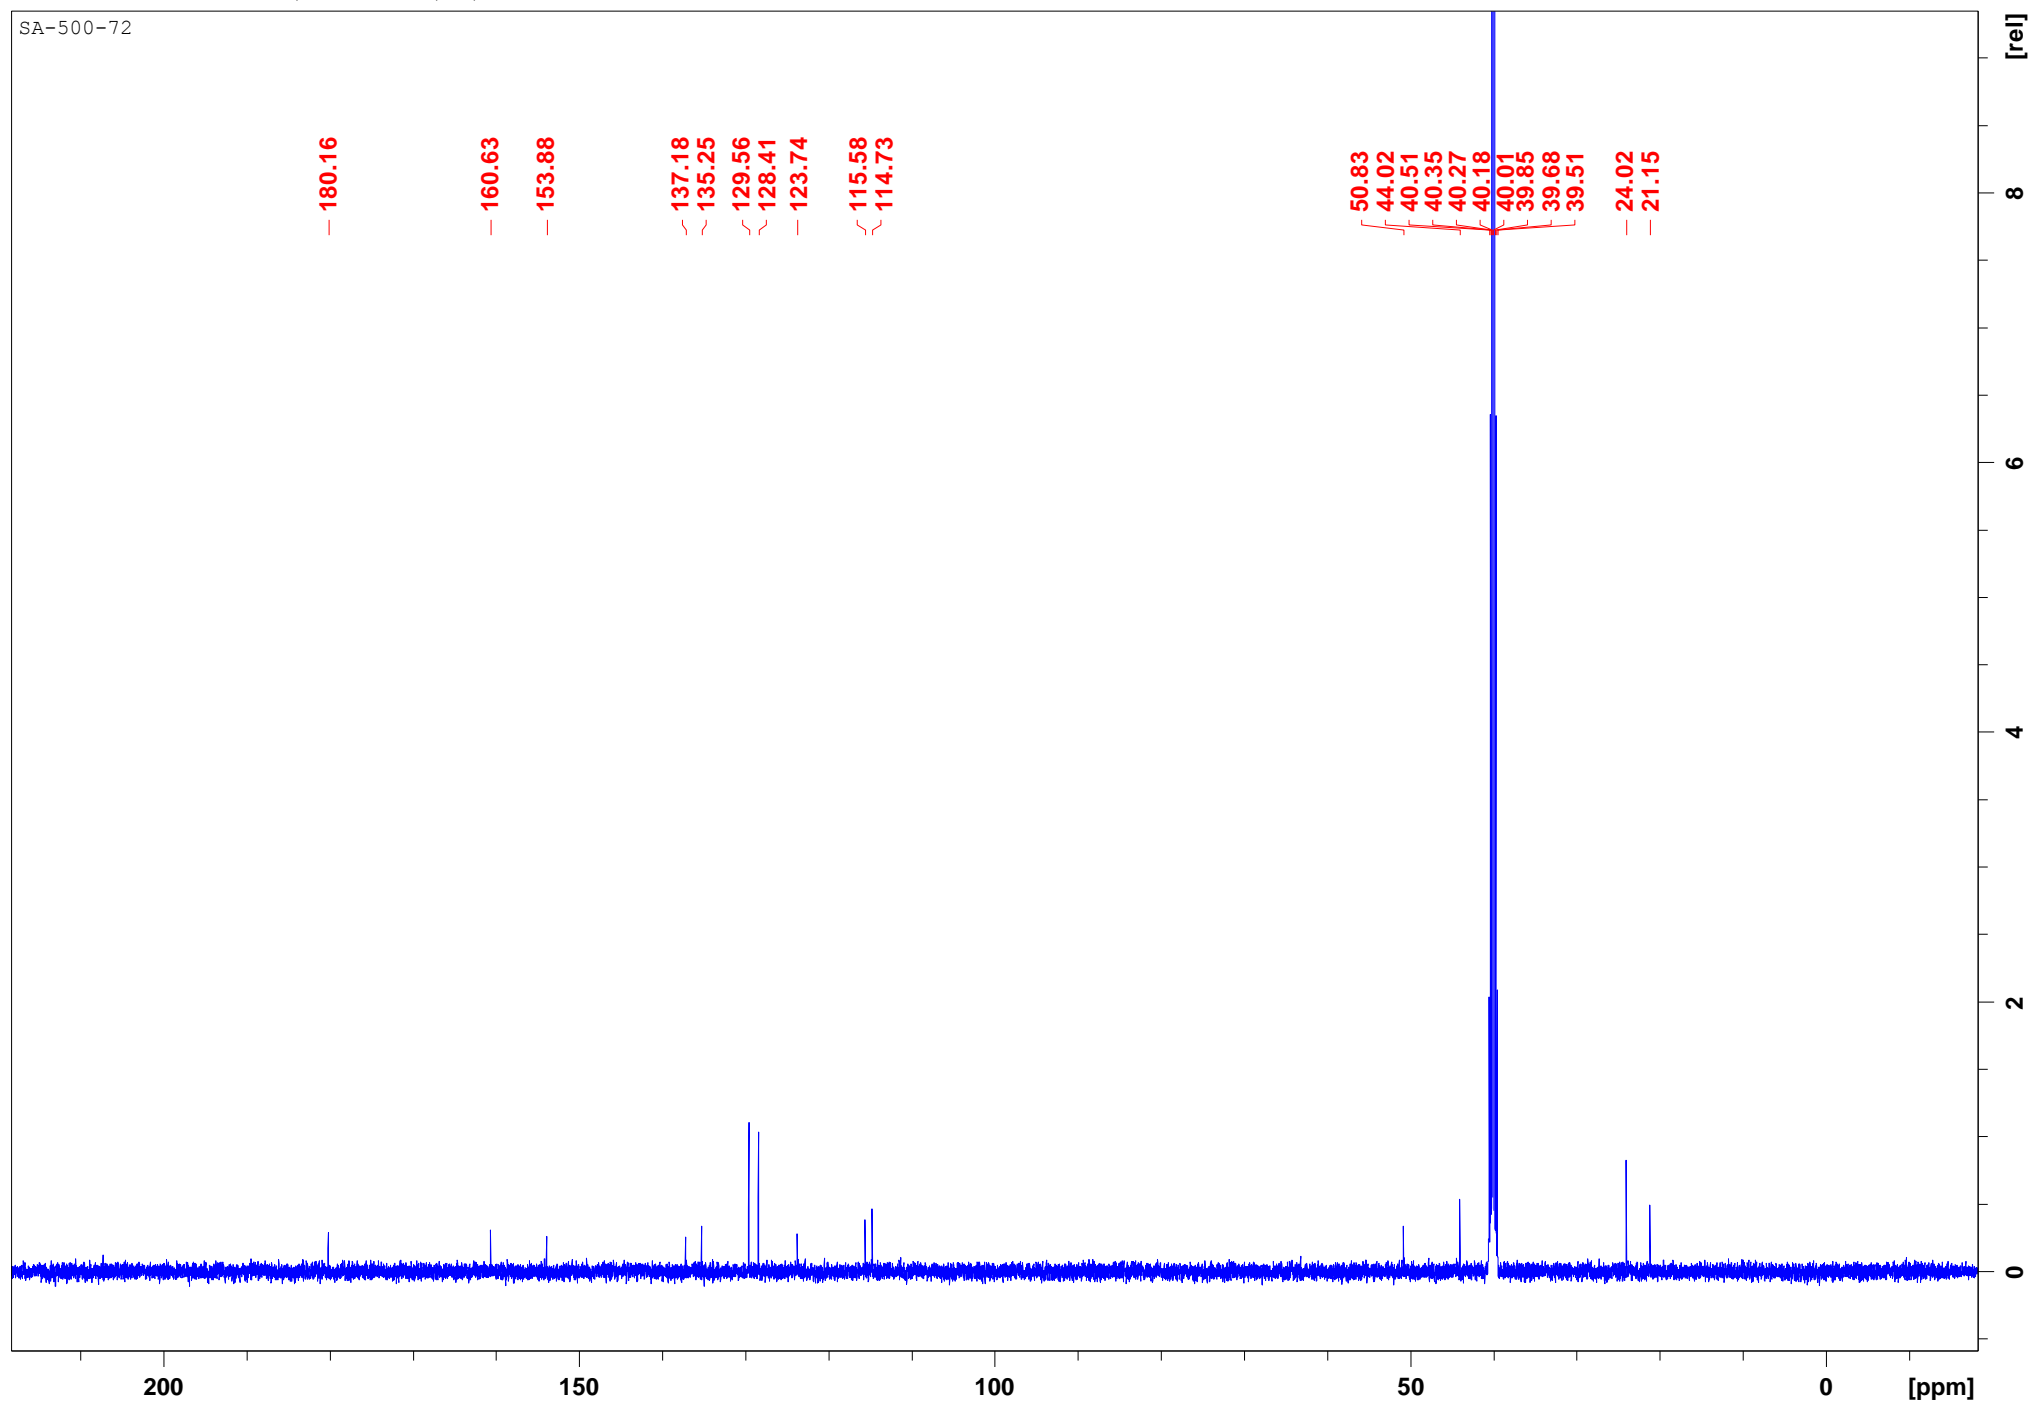

15m

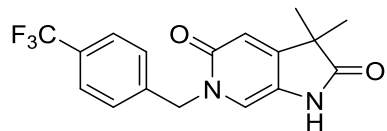

SA-500-62 10 1 "V:\Old Server\SA\nmr"

SA-500-62

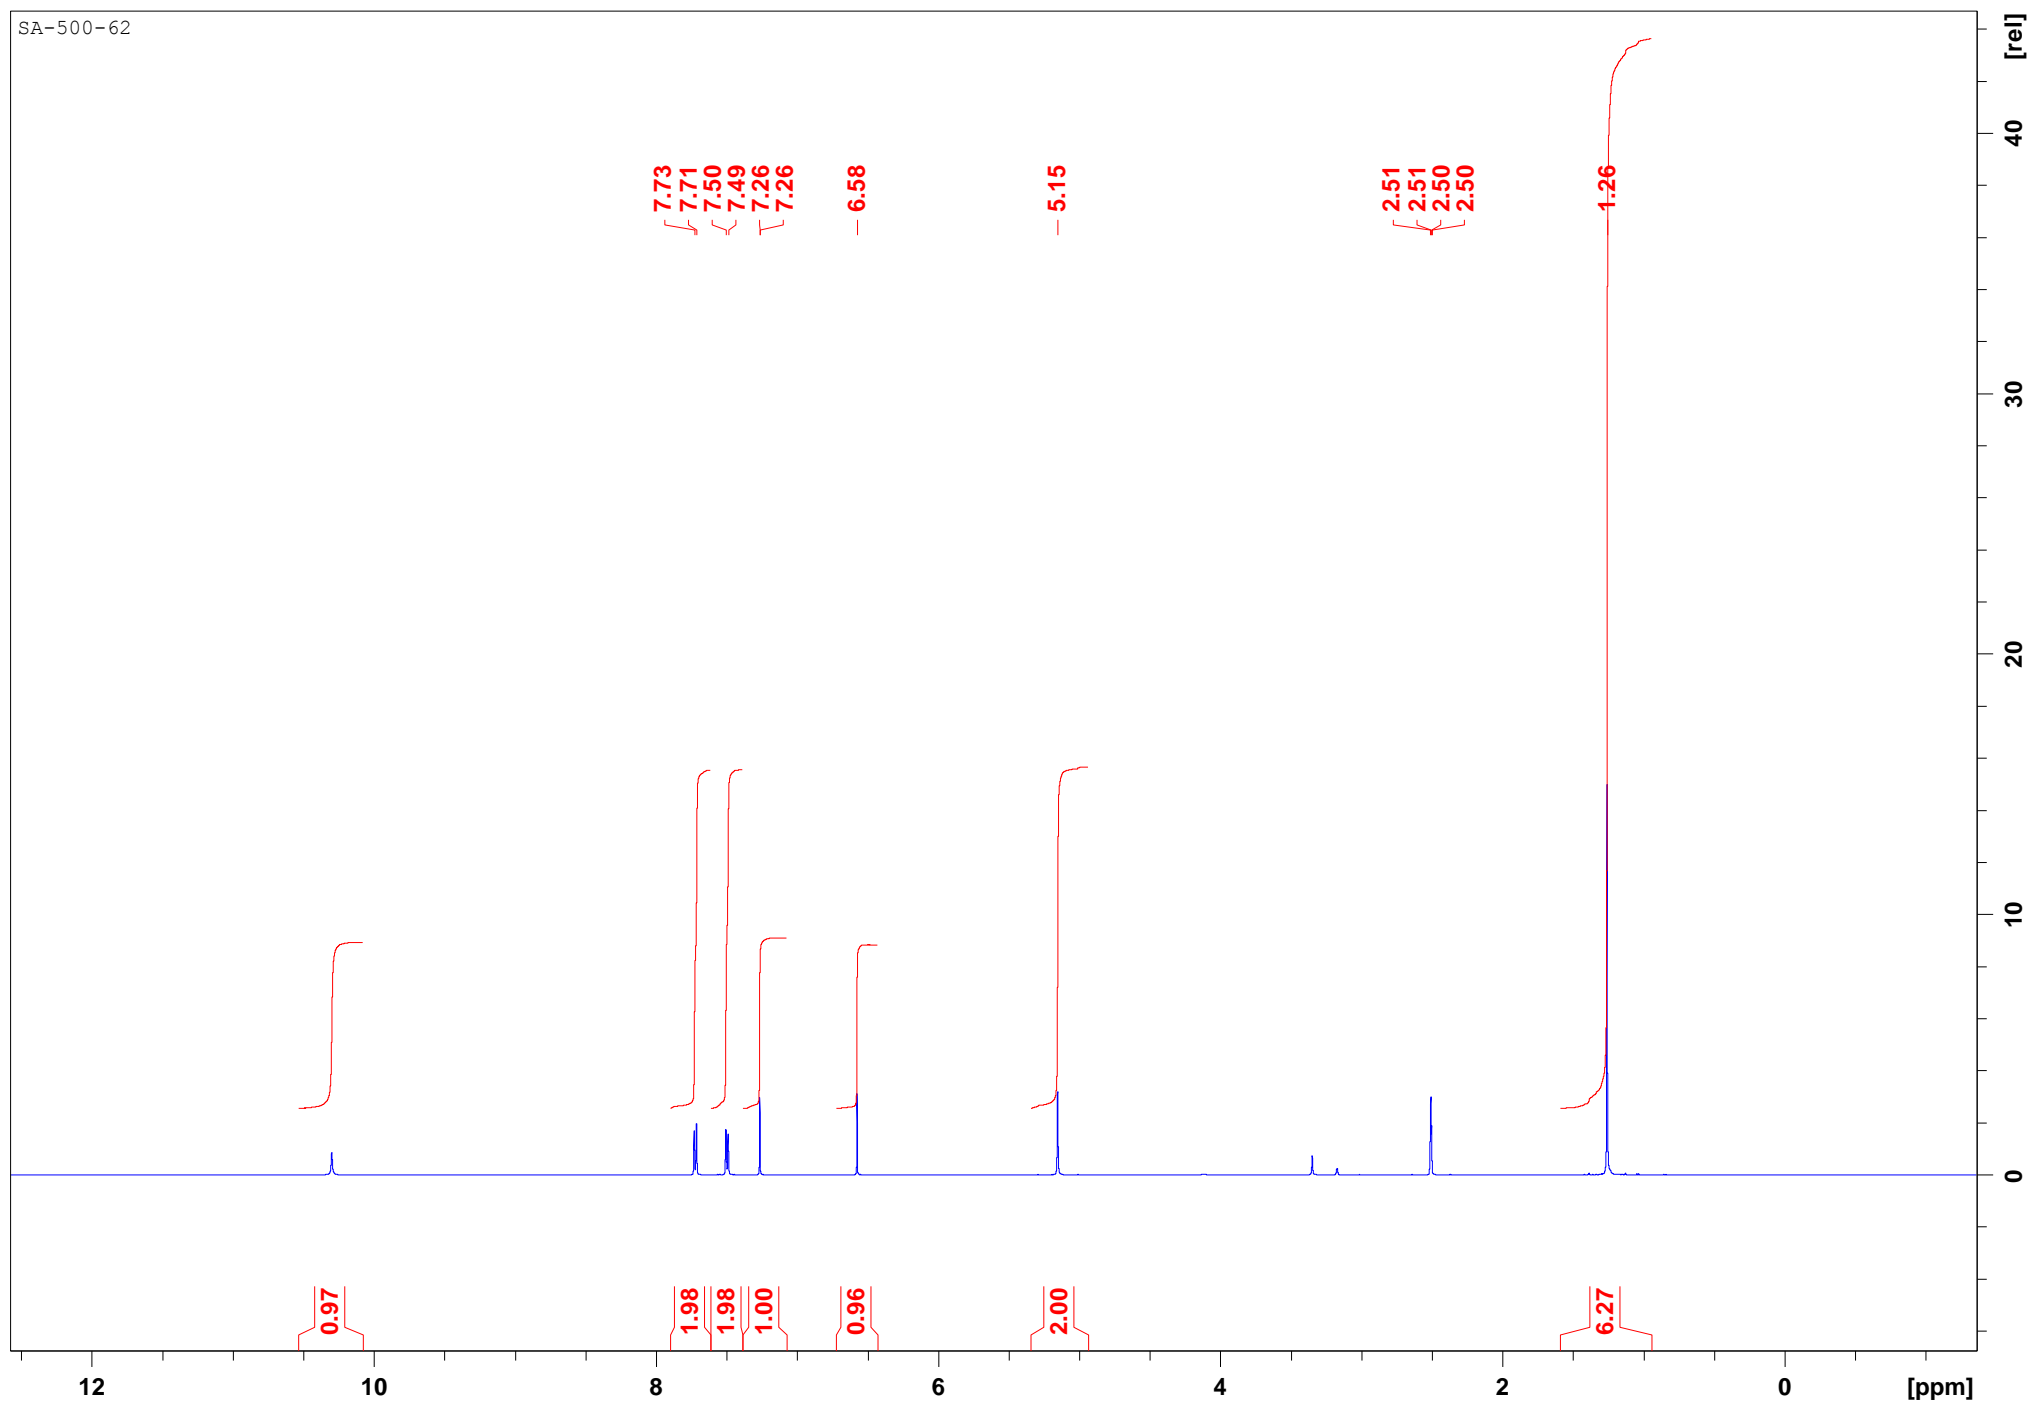

15m

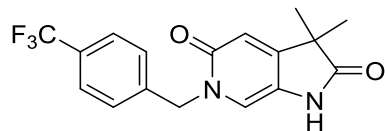

SA-500-62 11 1 "v:\Old Server\SA\nmr"

SA-500-62

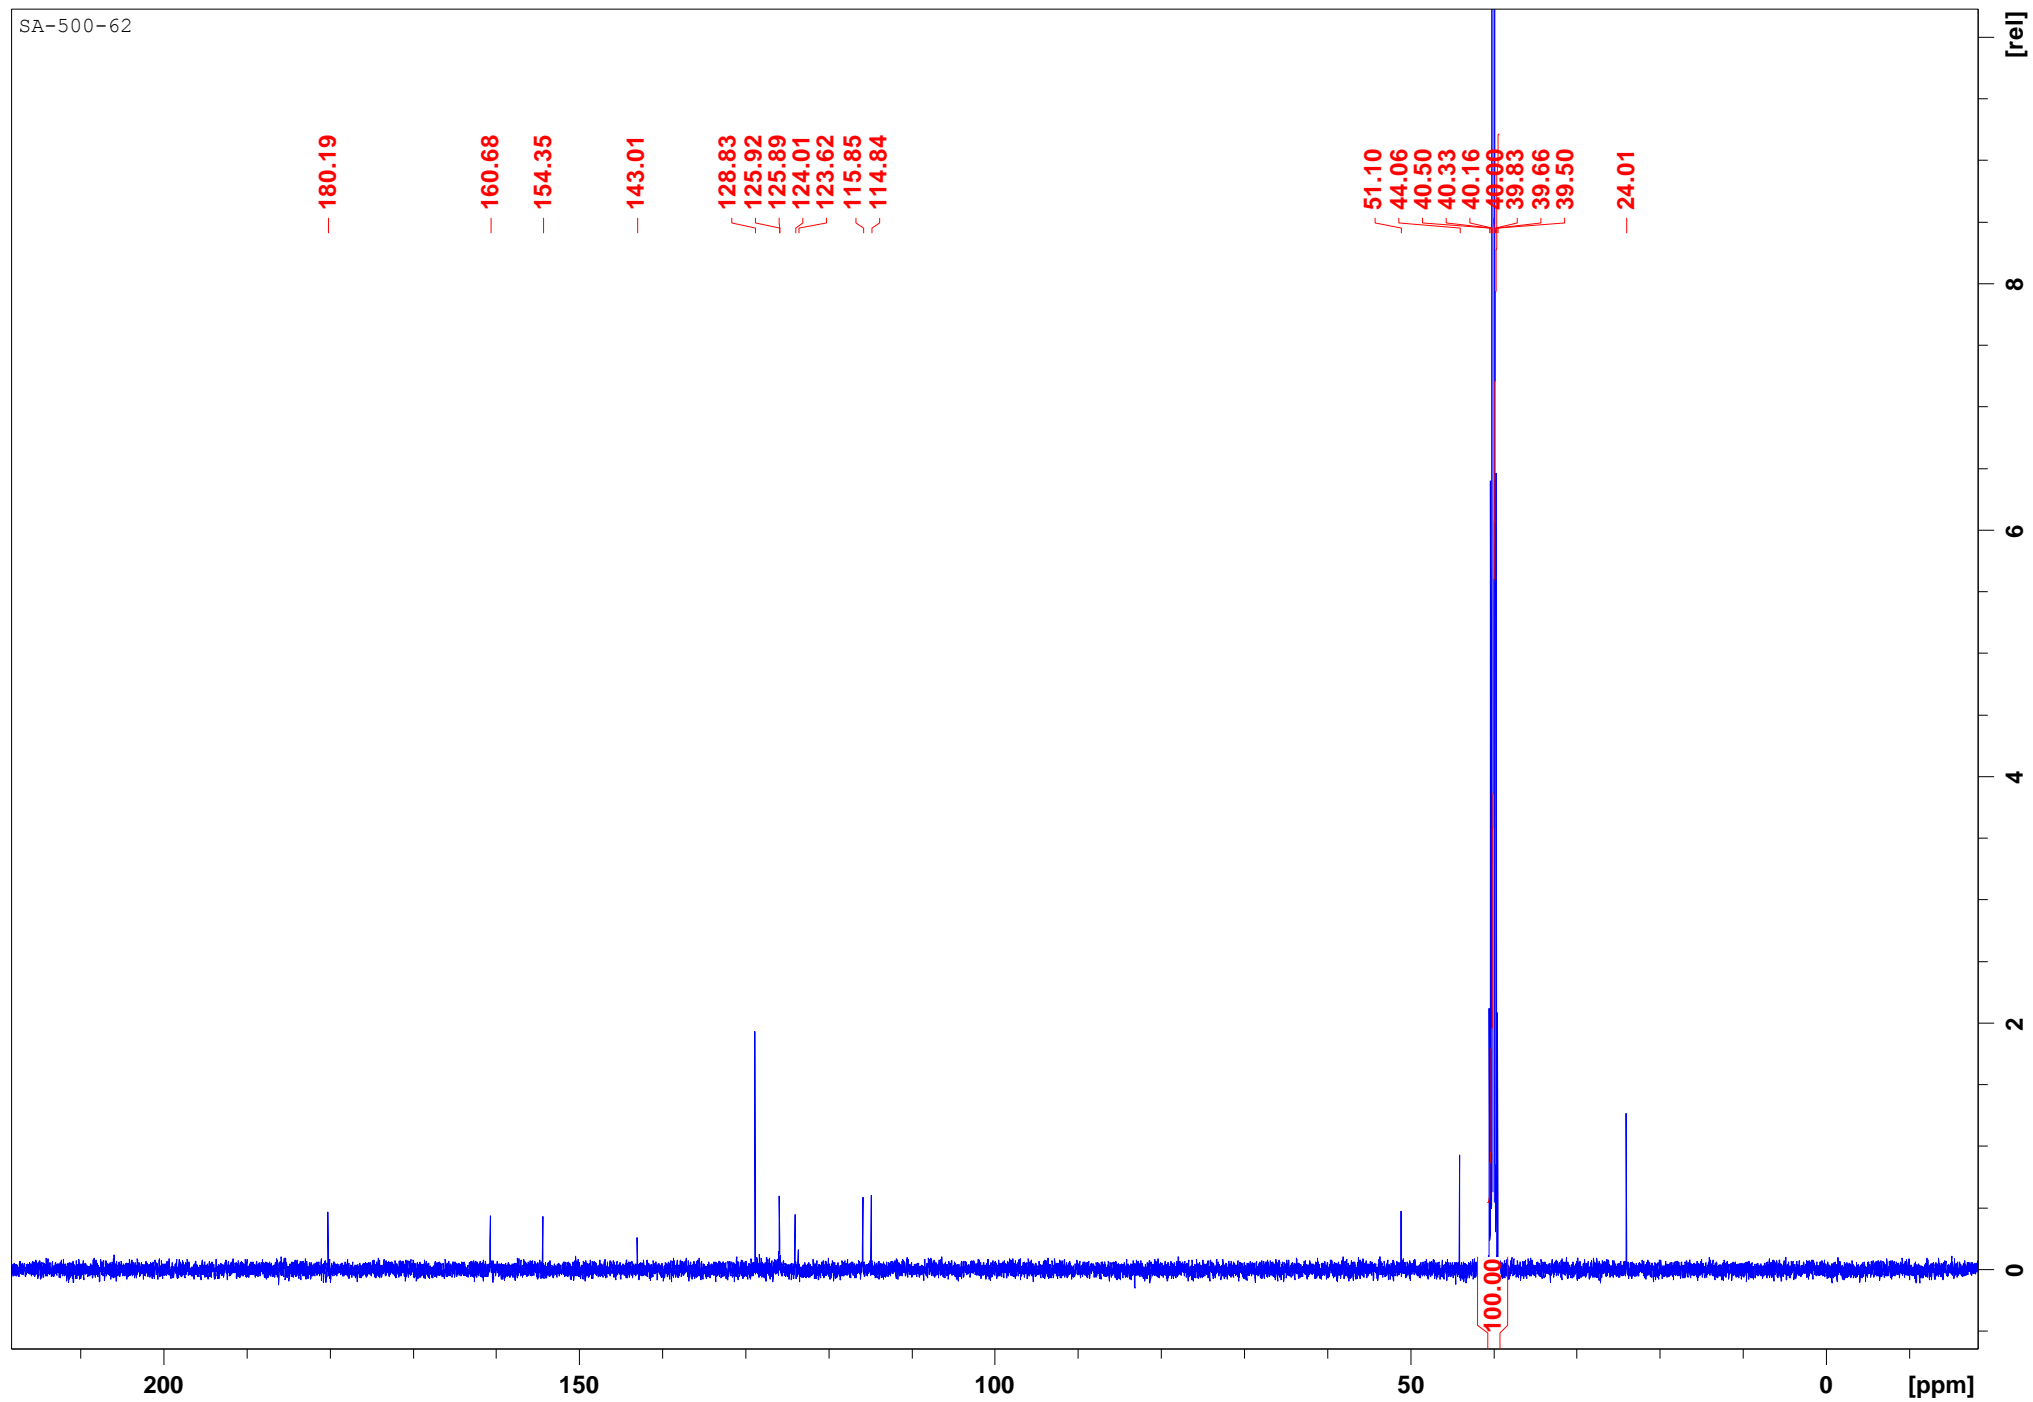

15n

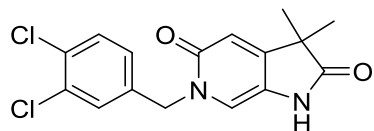

SA-500-78 10 1 "V:\Old Server\SA\nmr"

SA-500-78

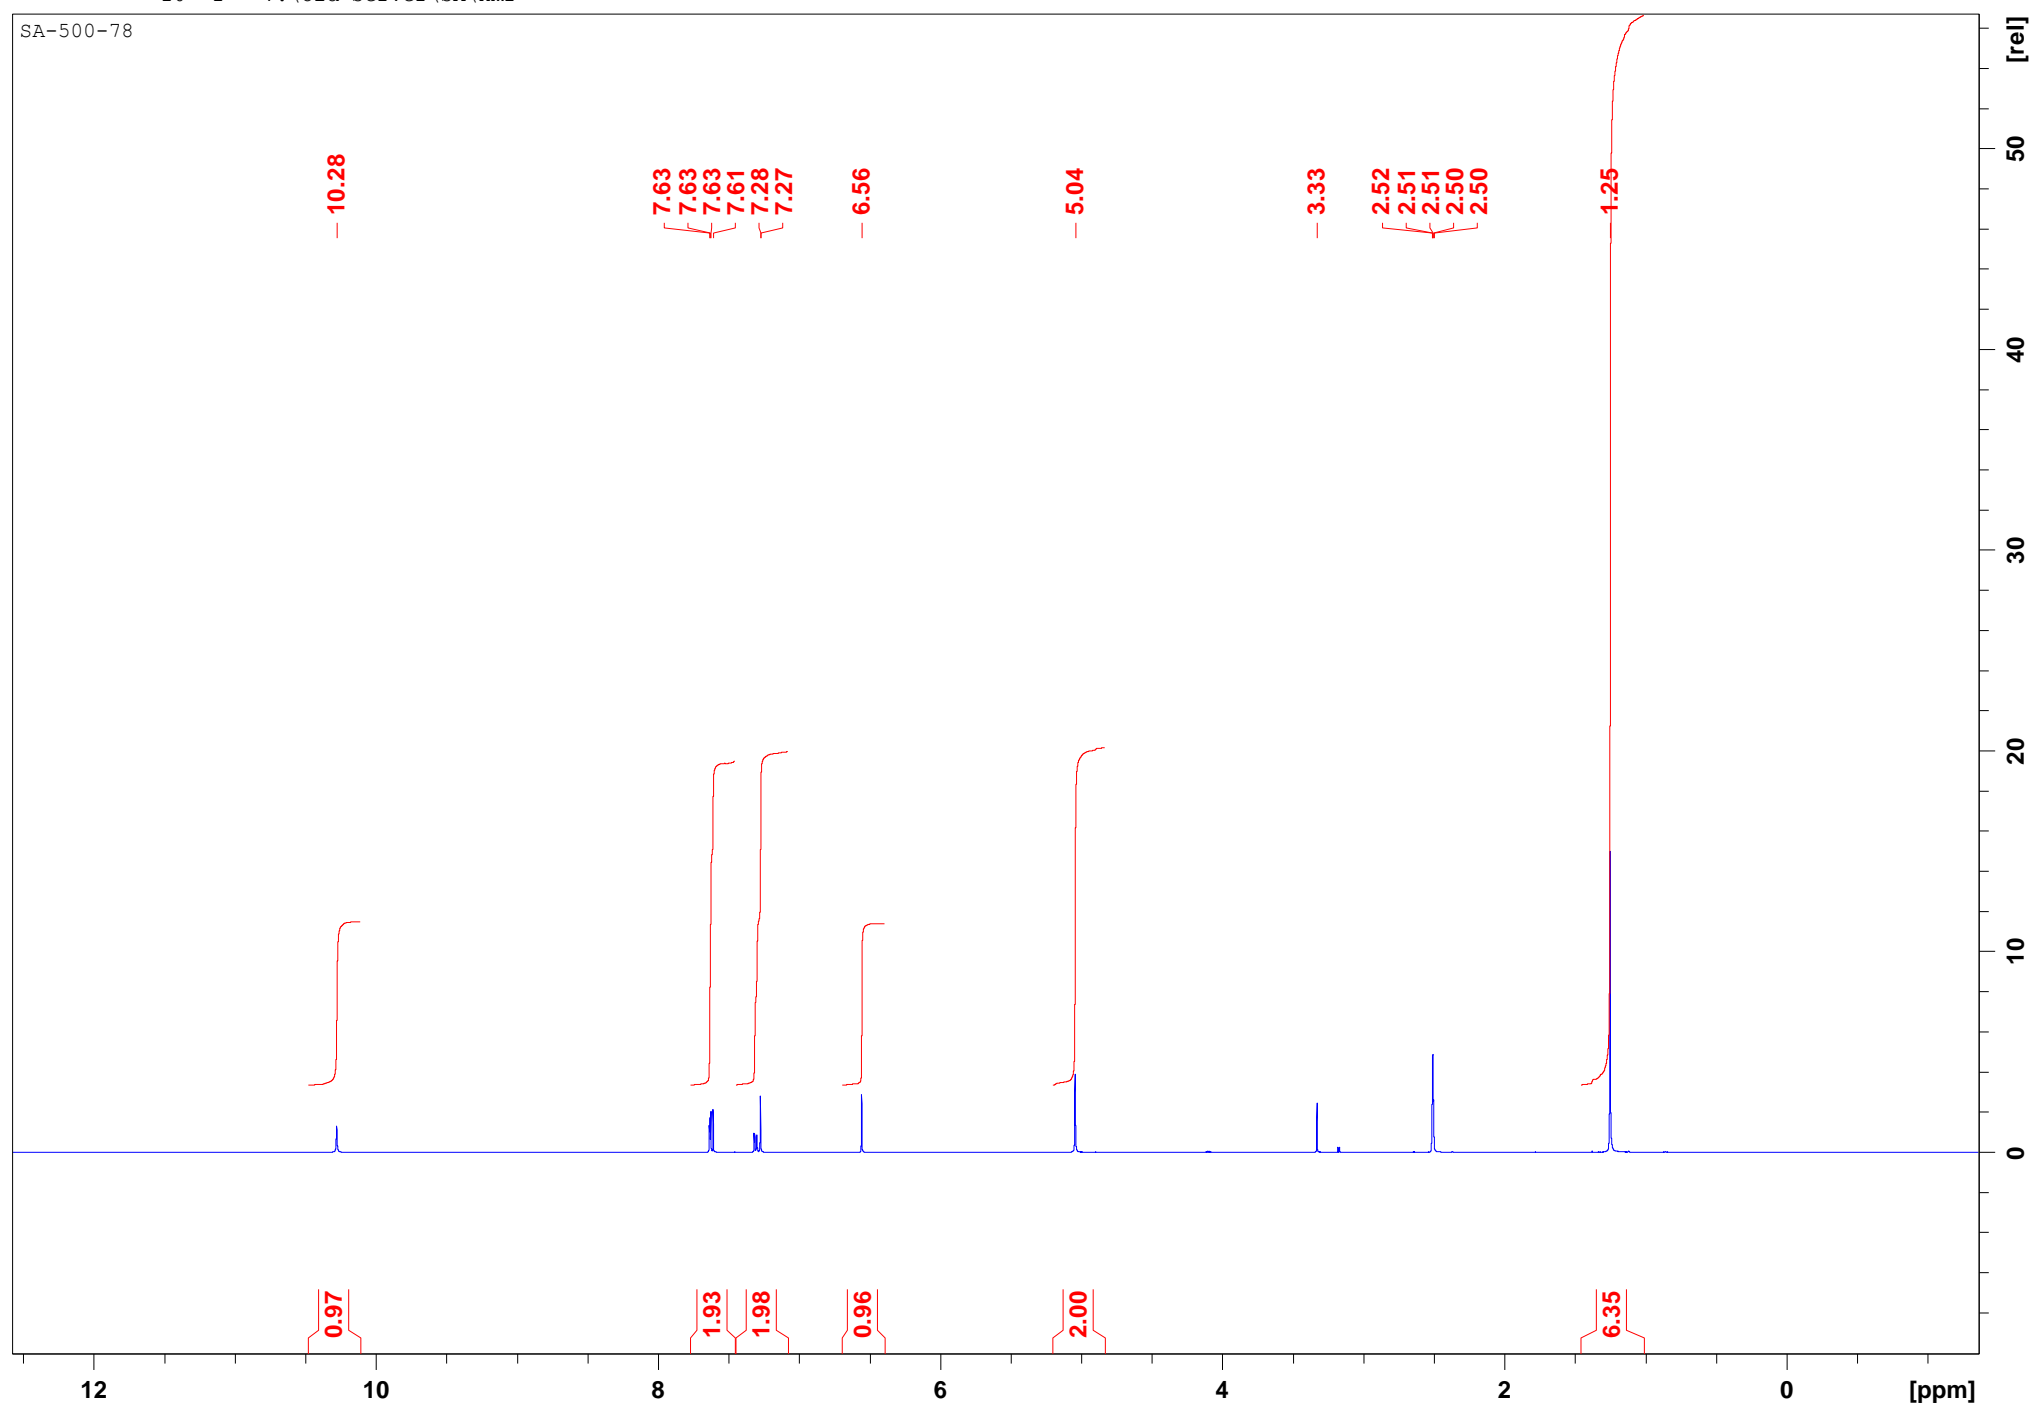

15n



SA-500-78 11 1 "V:\Old Server\SA\nmr"

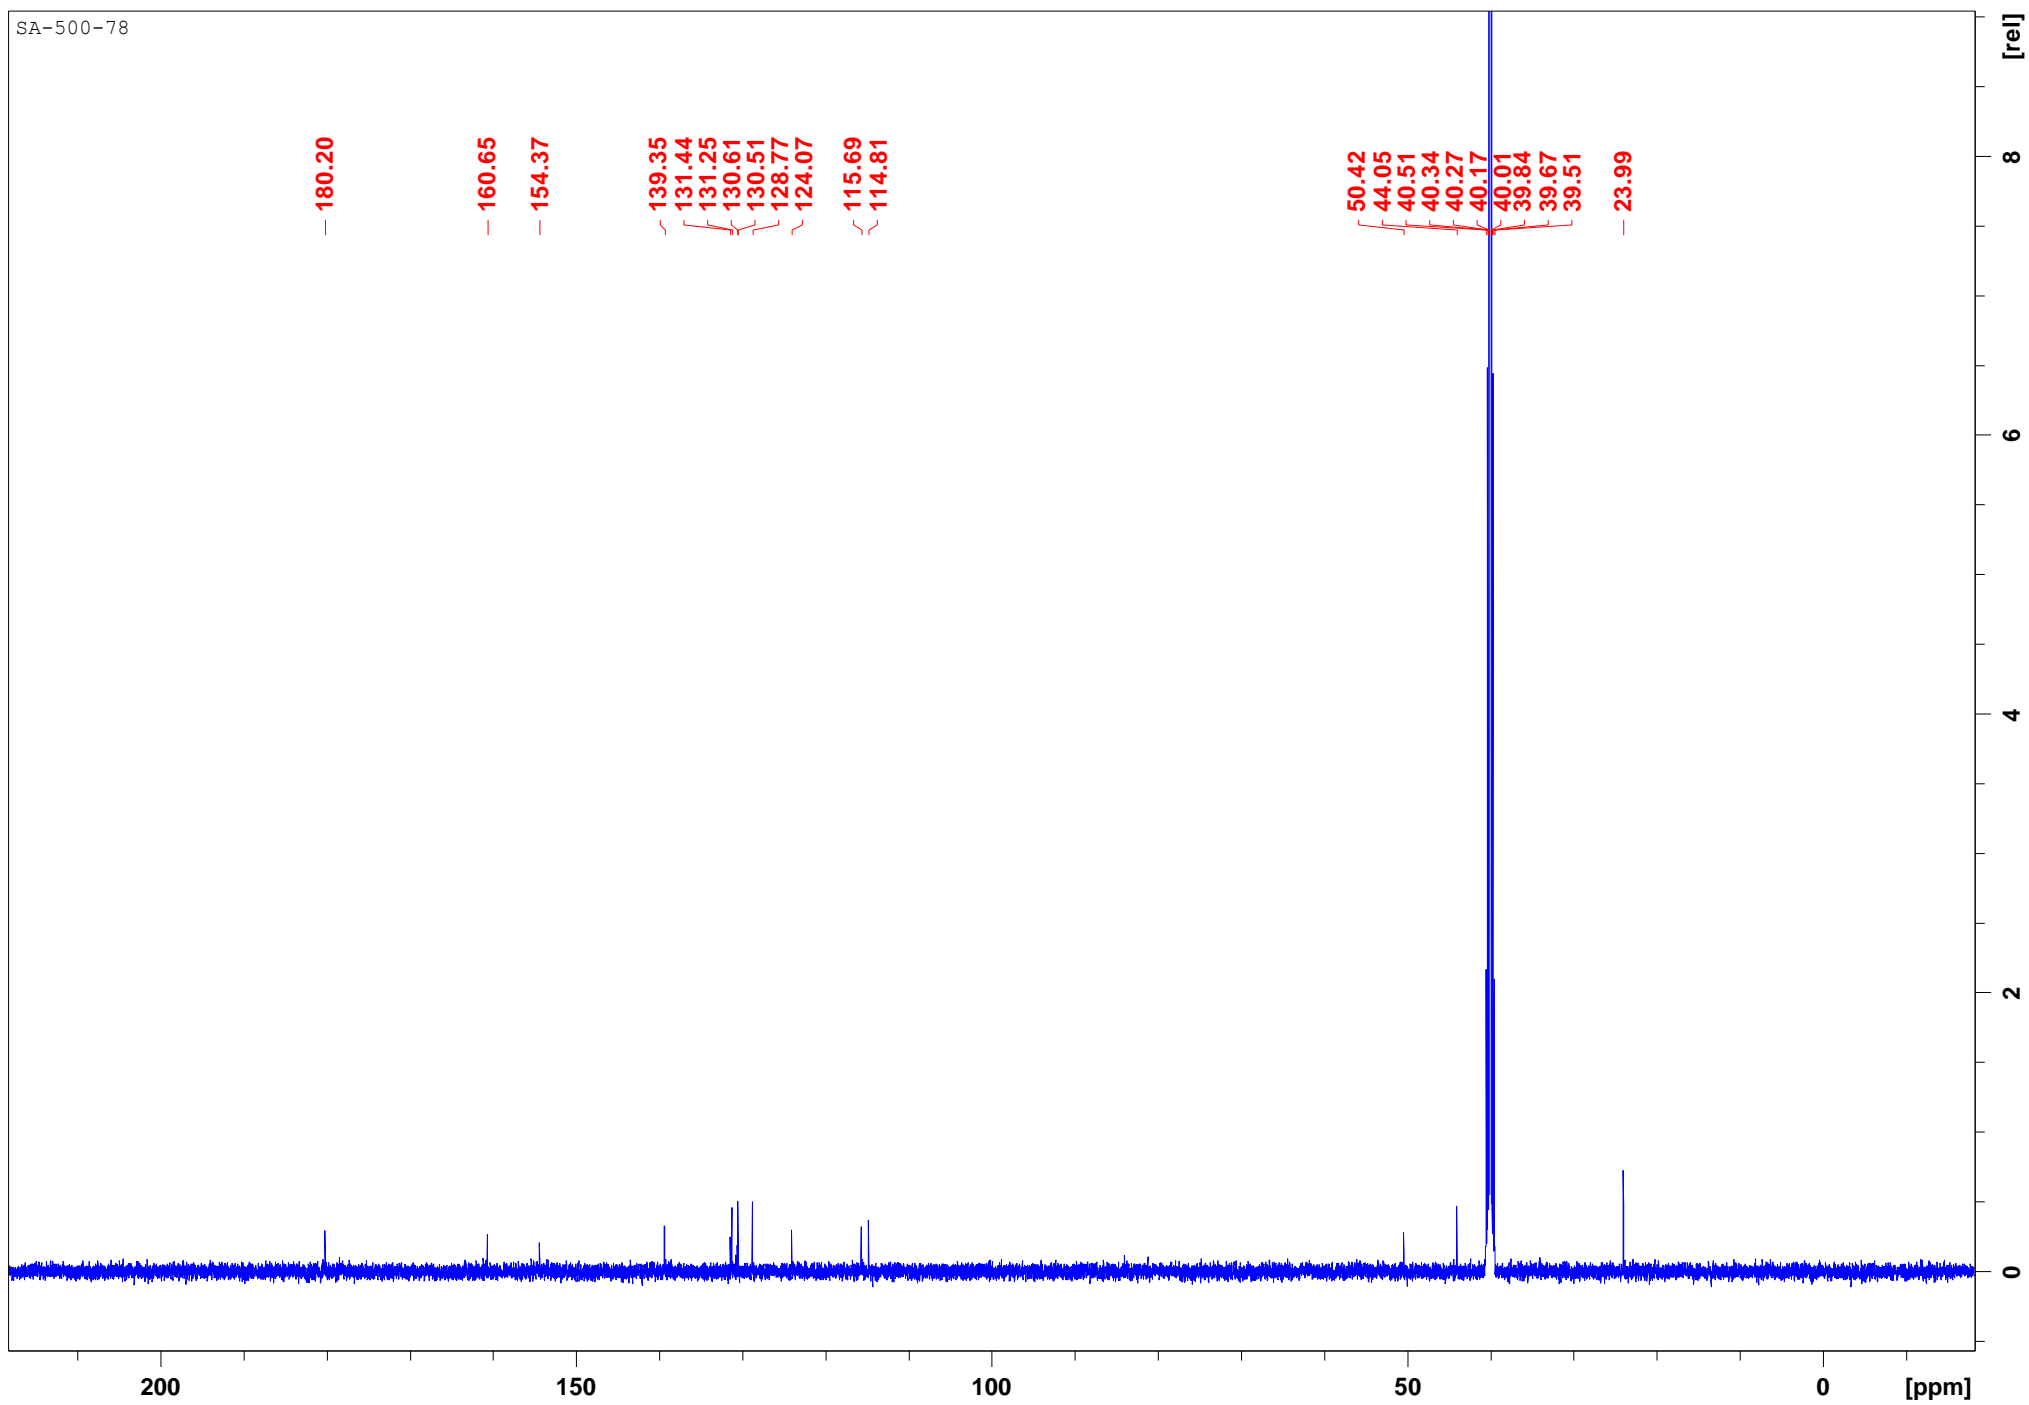

15o

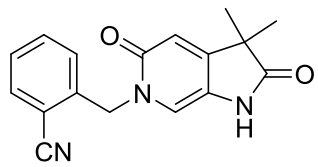

SA-500-22 10 1 "v:\Old Server\SA\nmr"

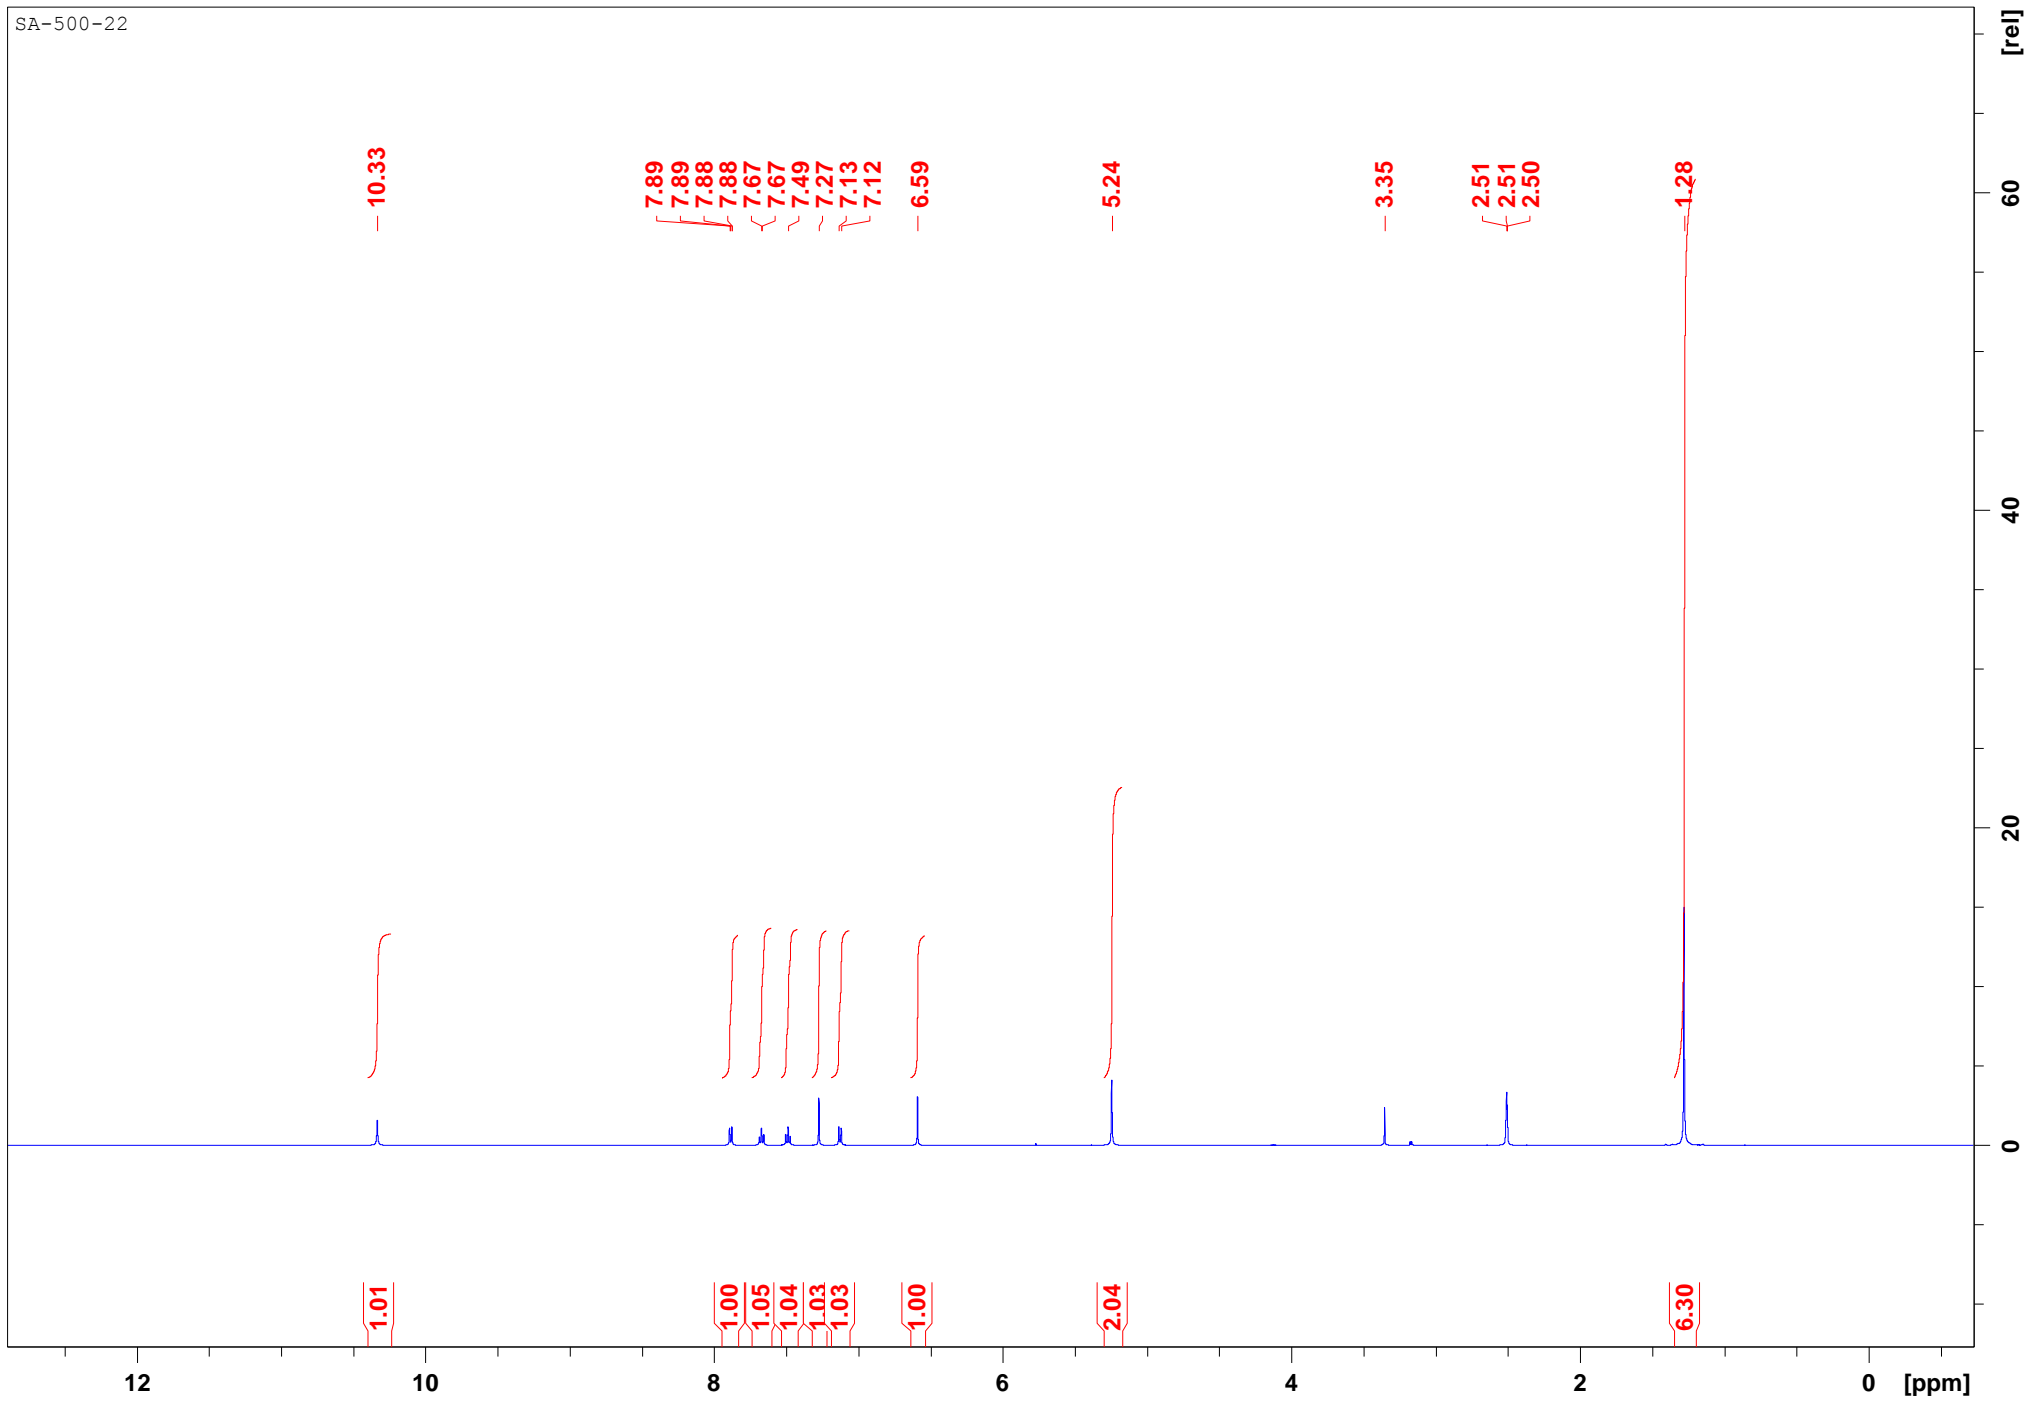

15o

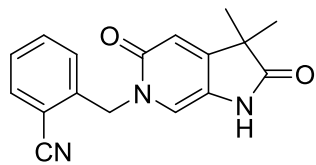

SA-500-22 11 1 "v:\Old Server\SA\nmr"

SA-500-22

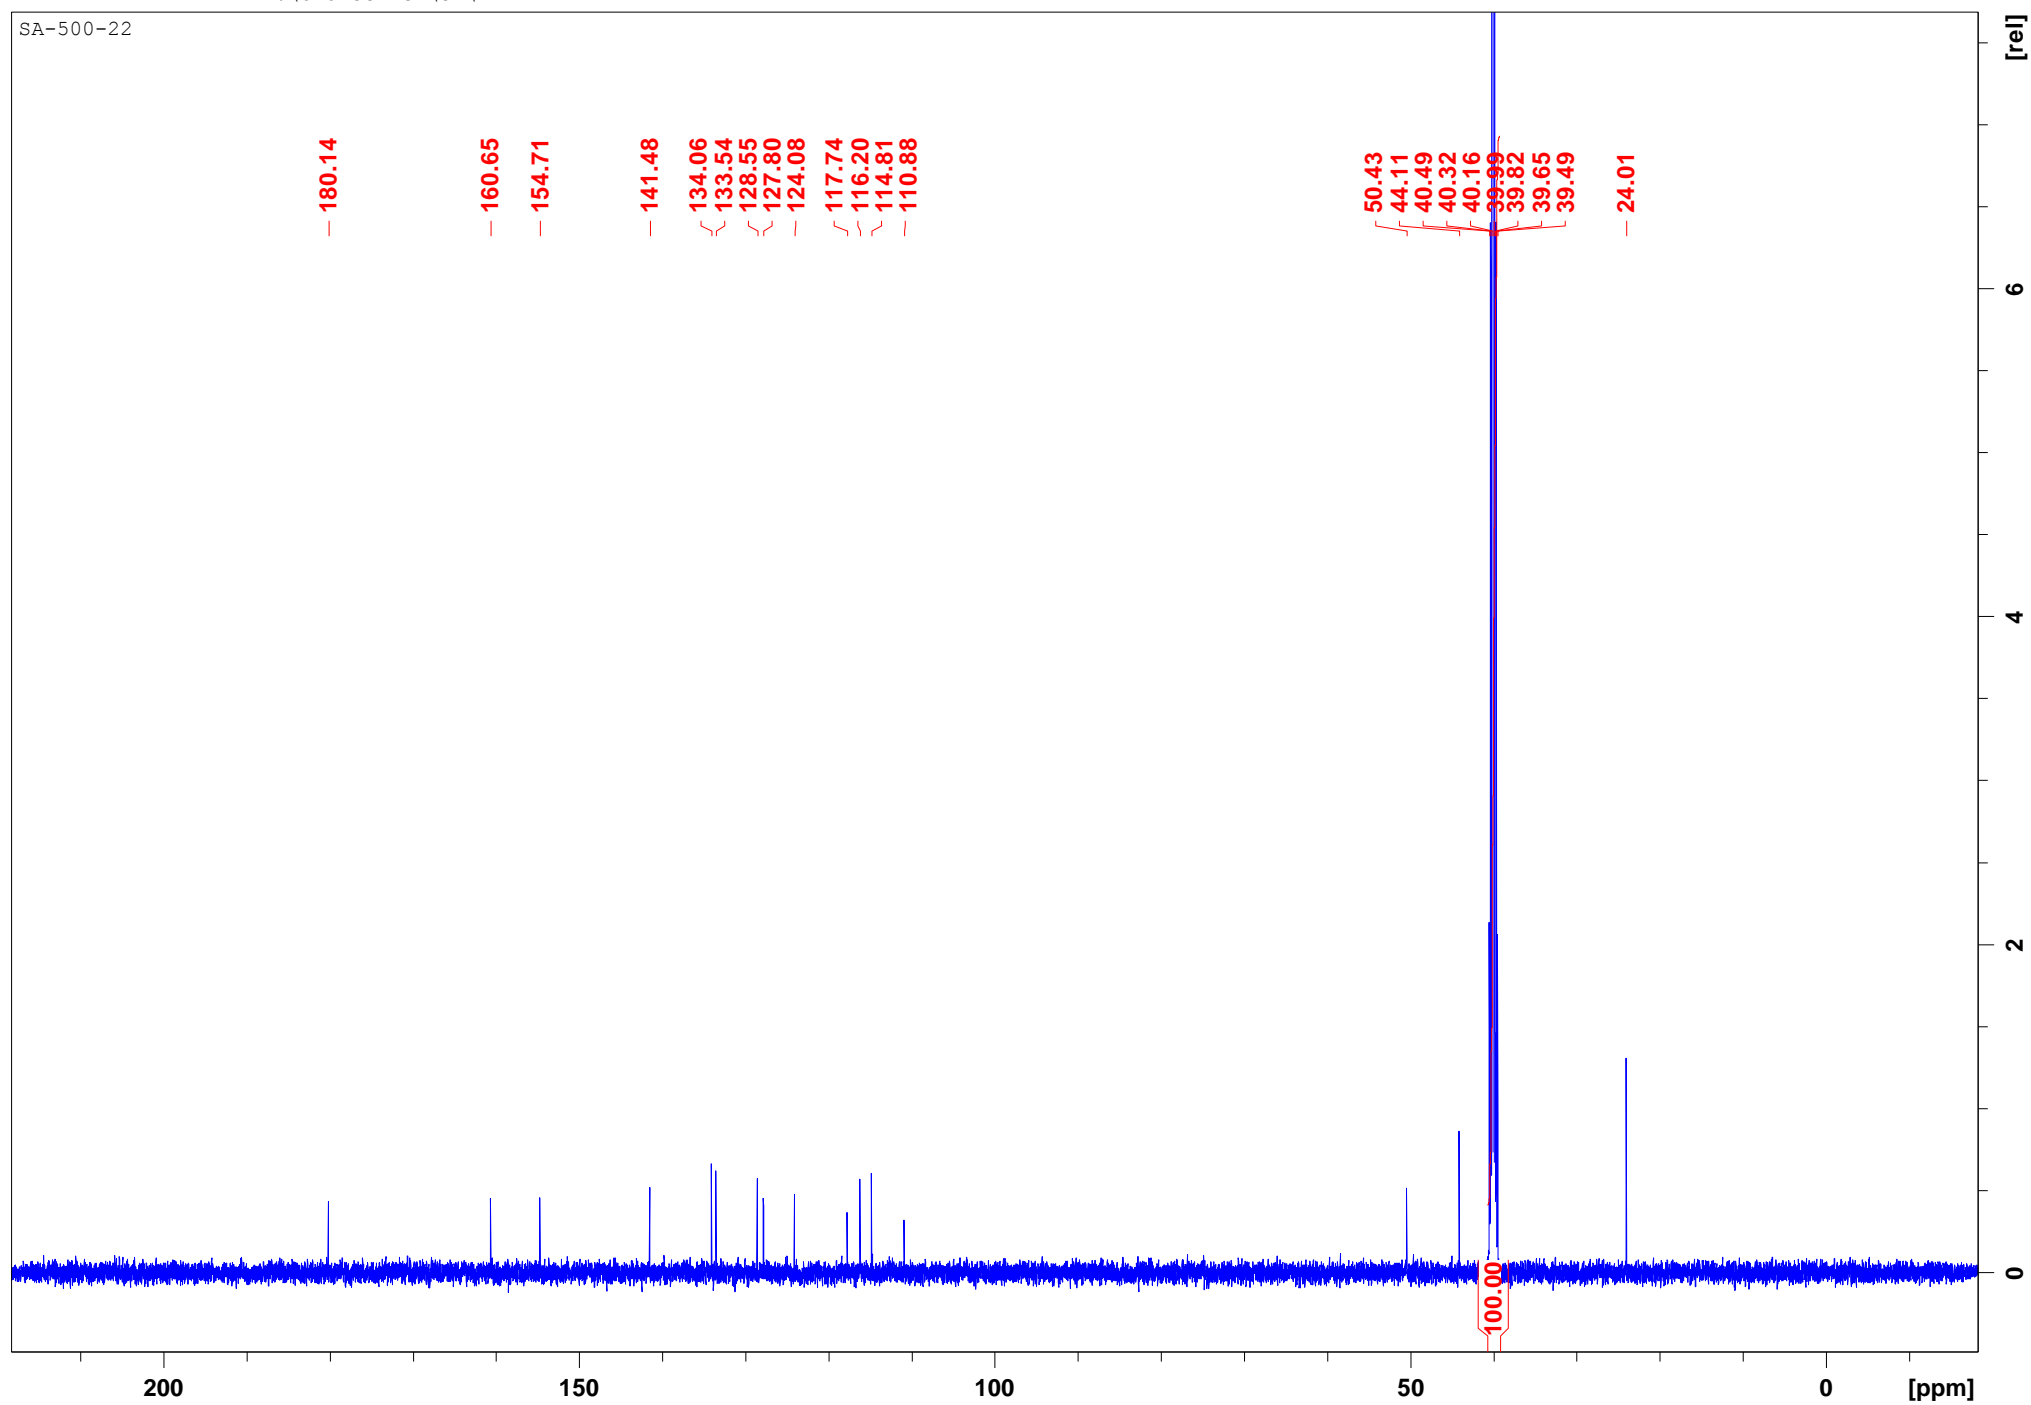



15p

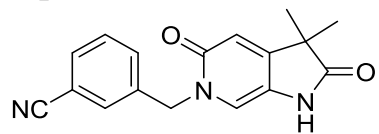

SA-500-28 10 1 "V:\Old Server\SA\nmr"

SA-500-28

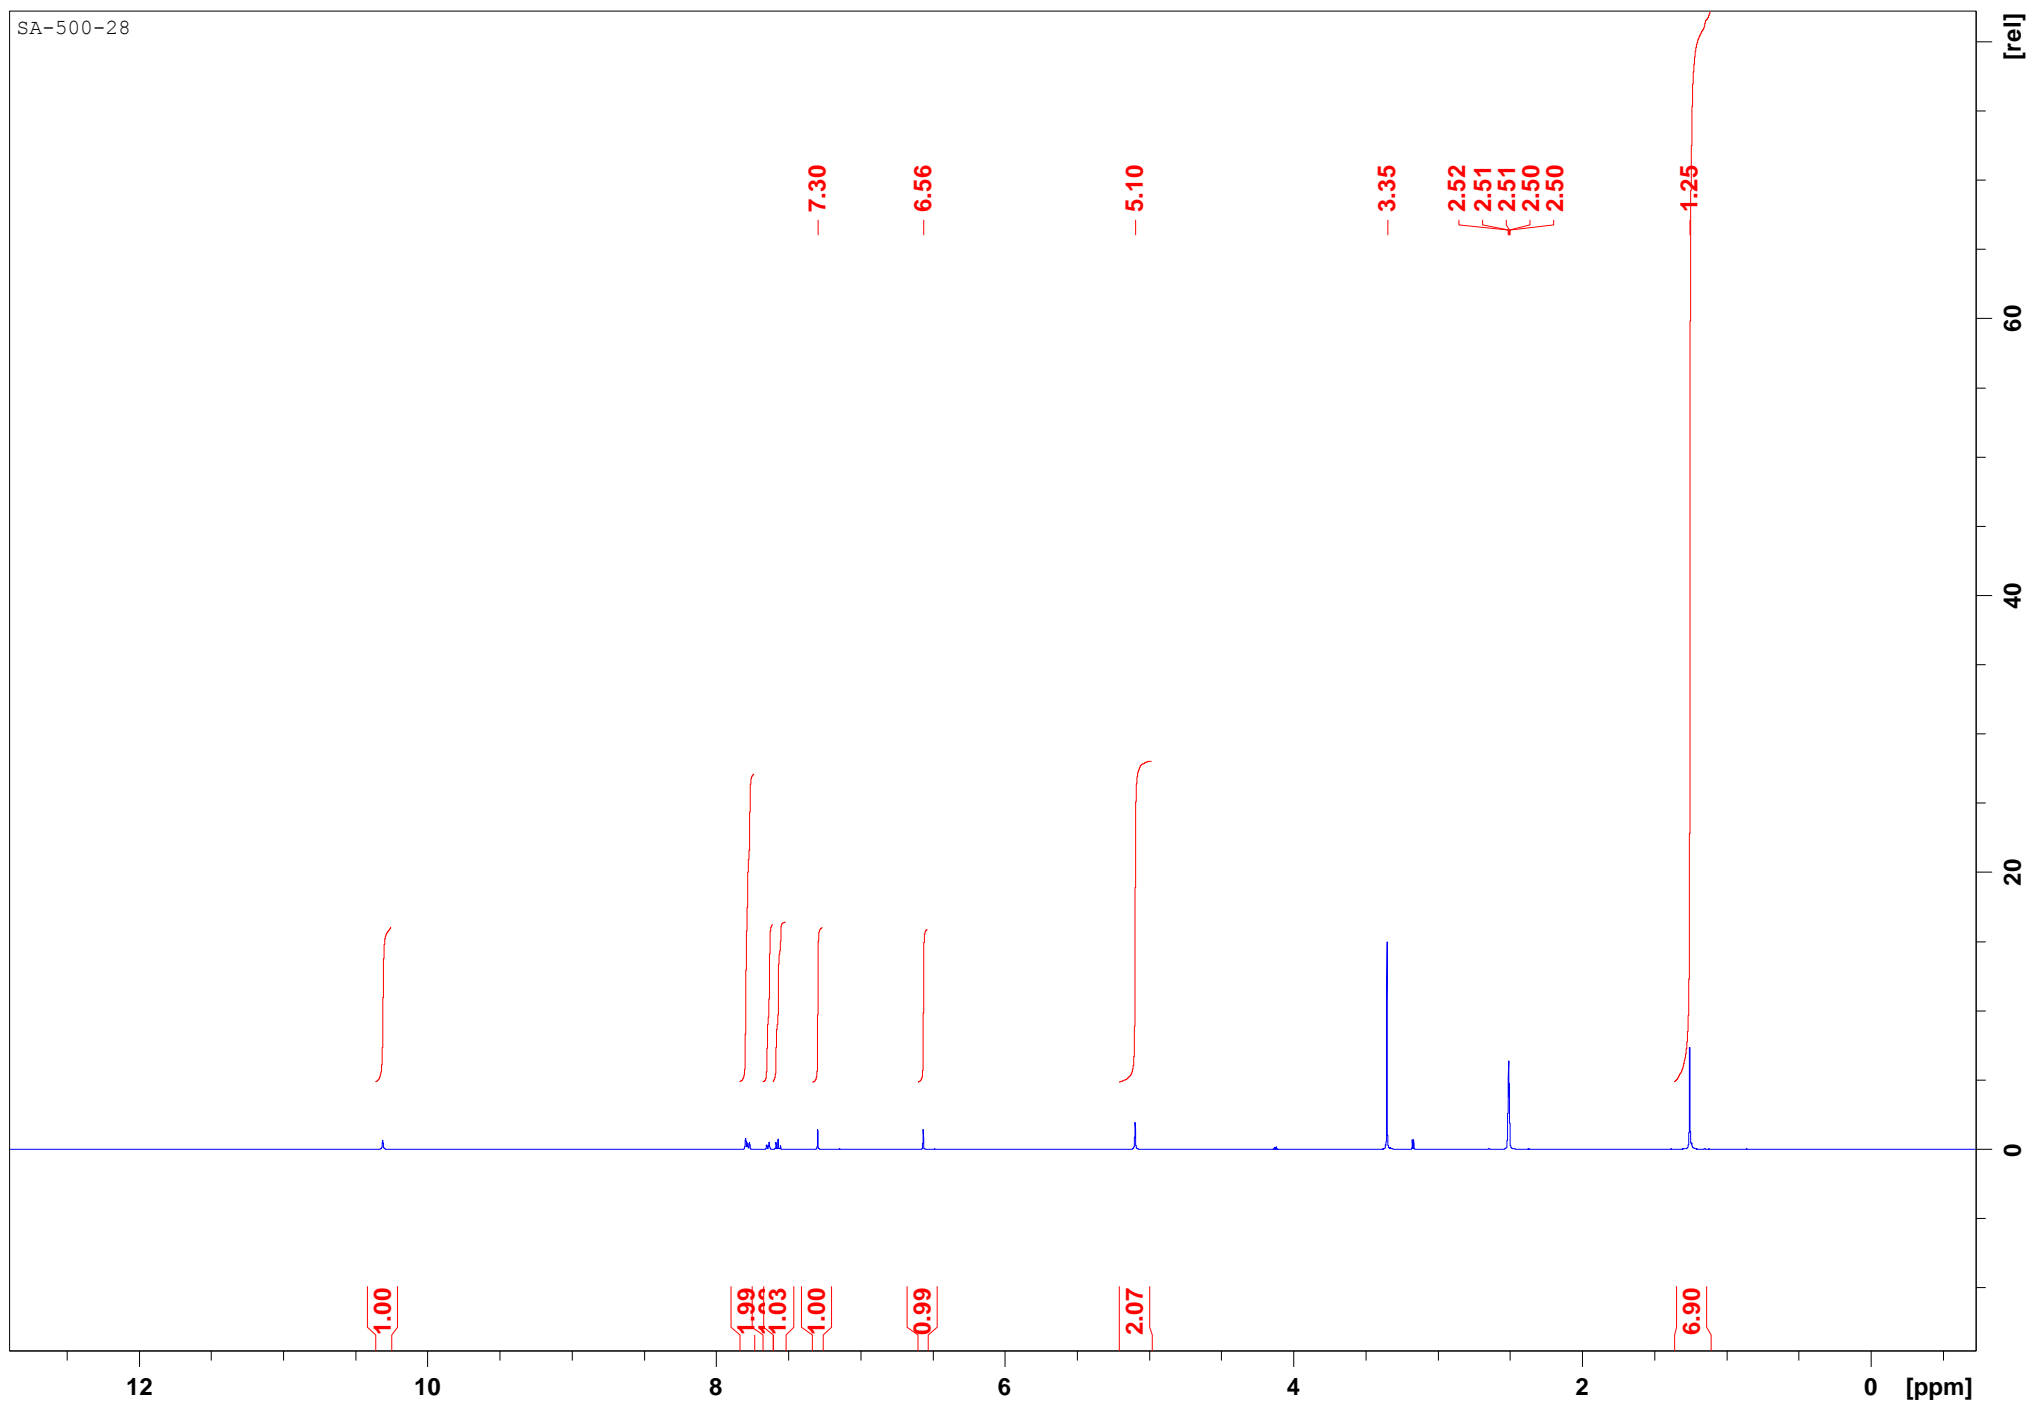

15p

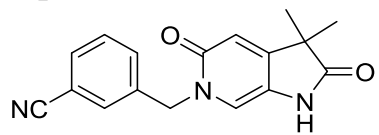

SA-500-28 15 1 "V:\Old Server\SA\nmr"

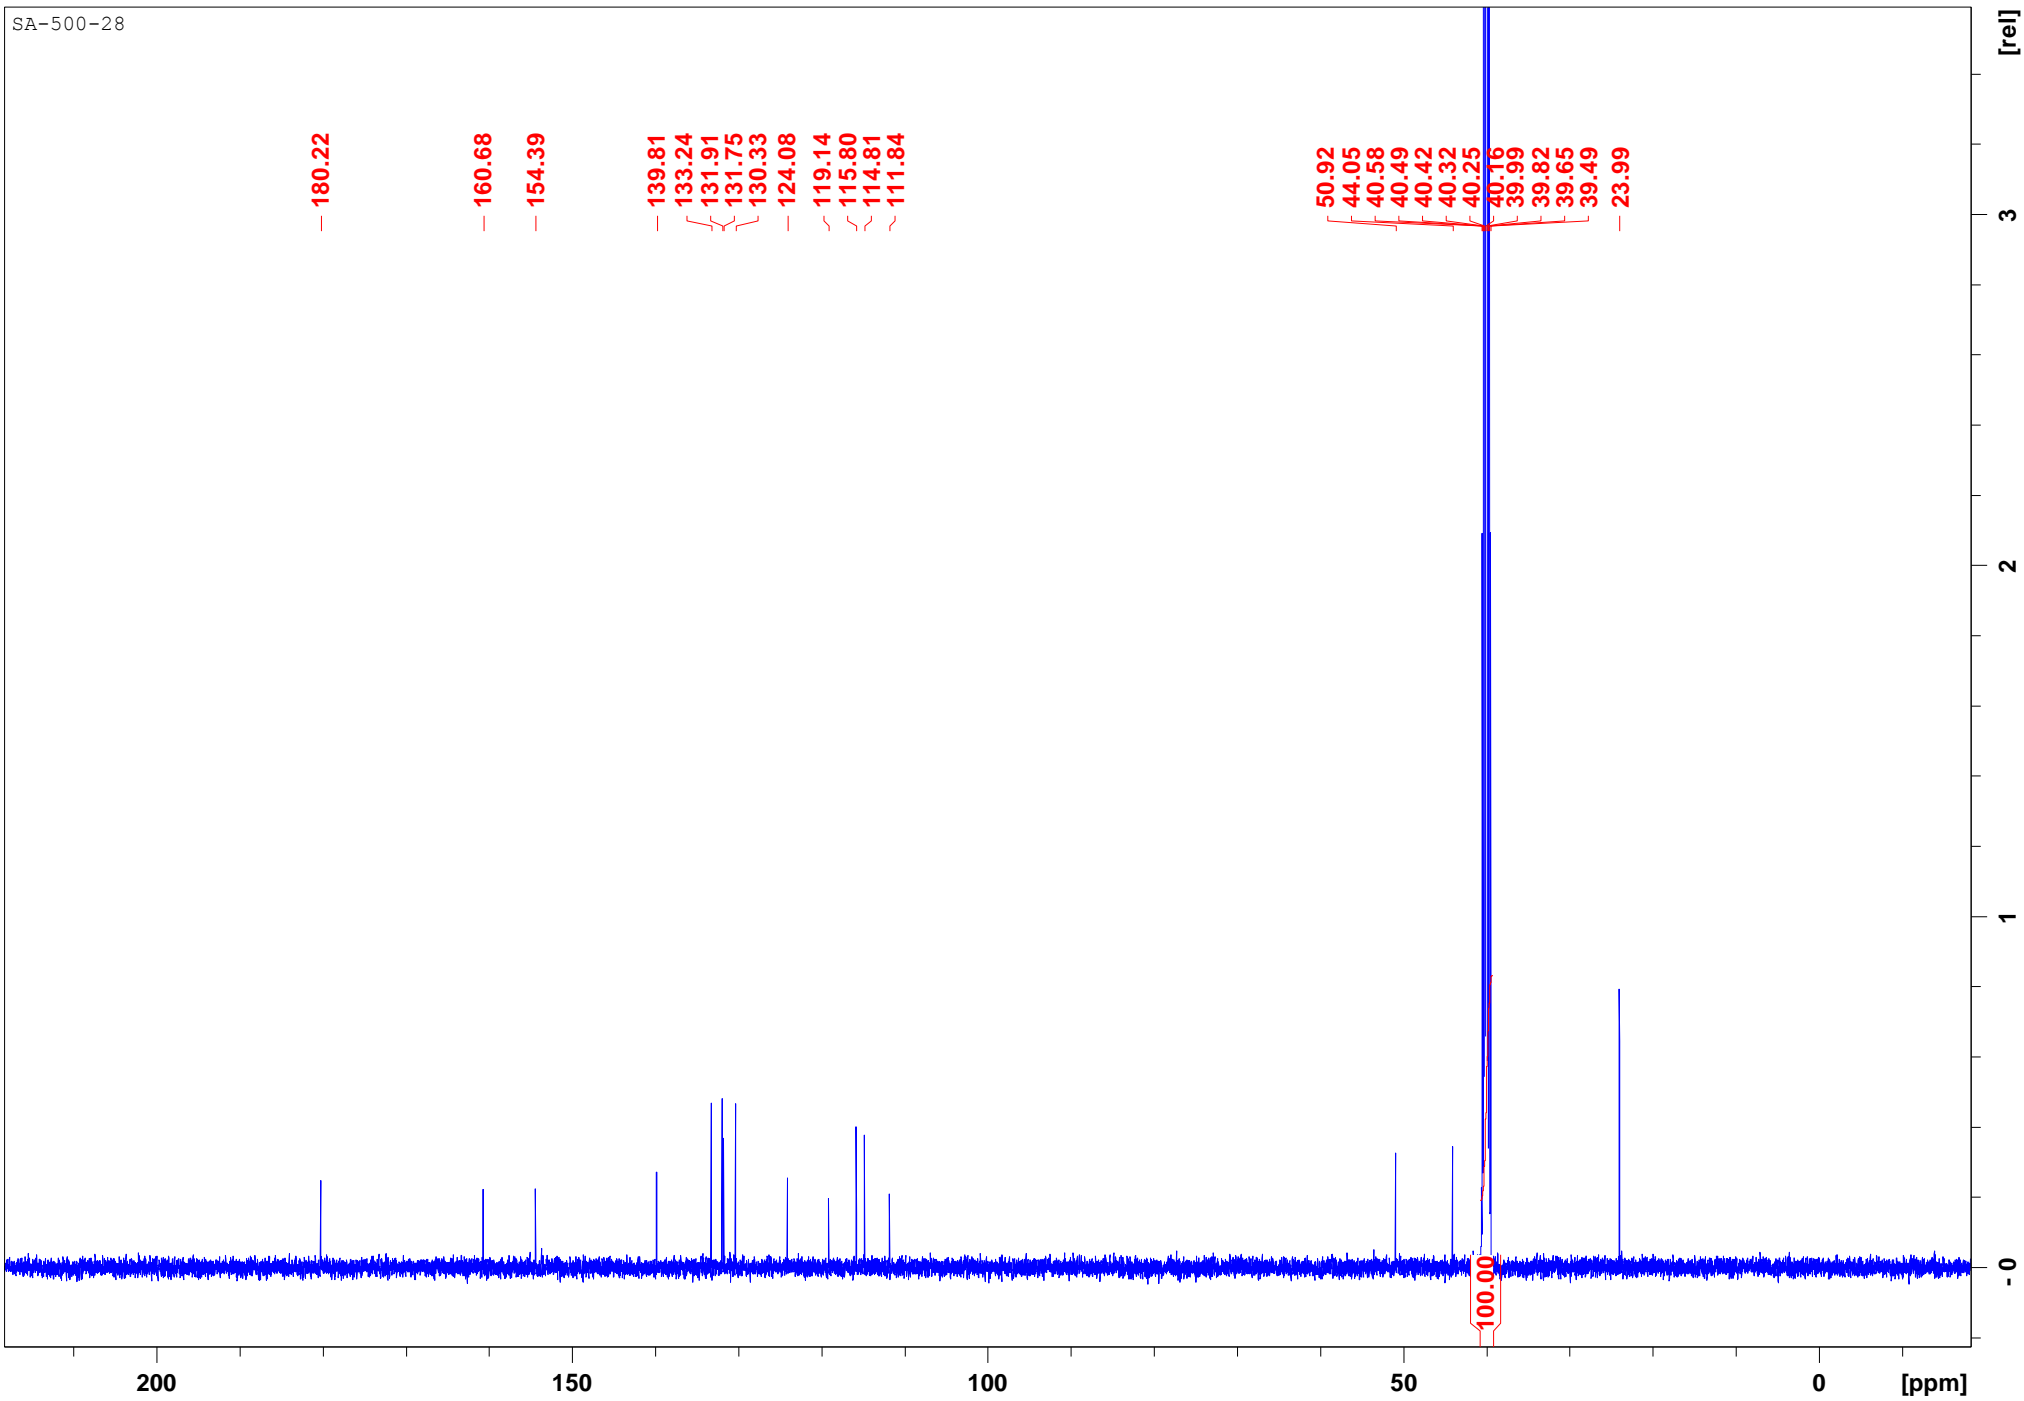

16a

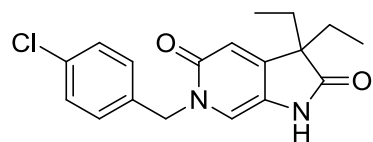

"dcm-494-160 conc cdcl3" 10 1 X:\data\DCM\nmr

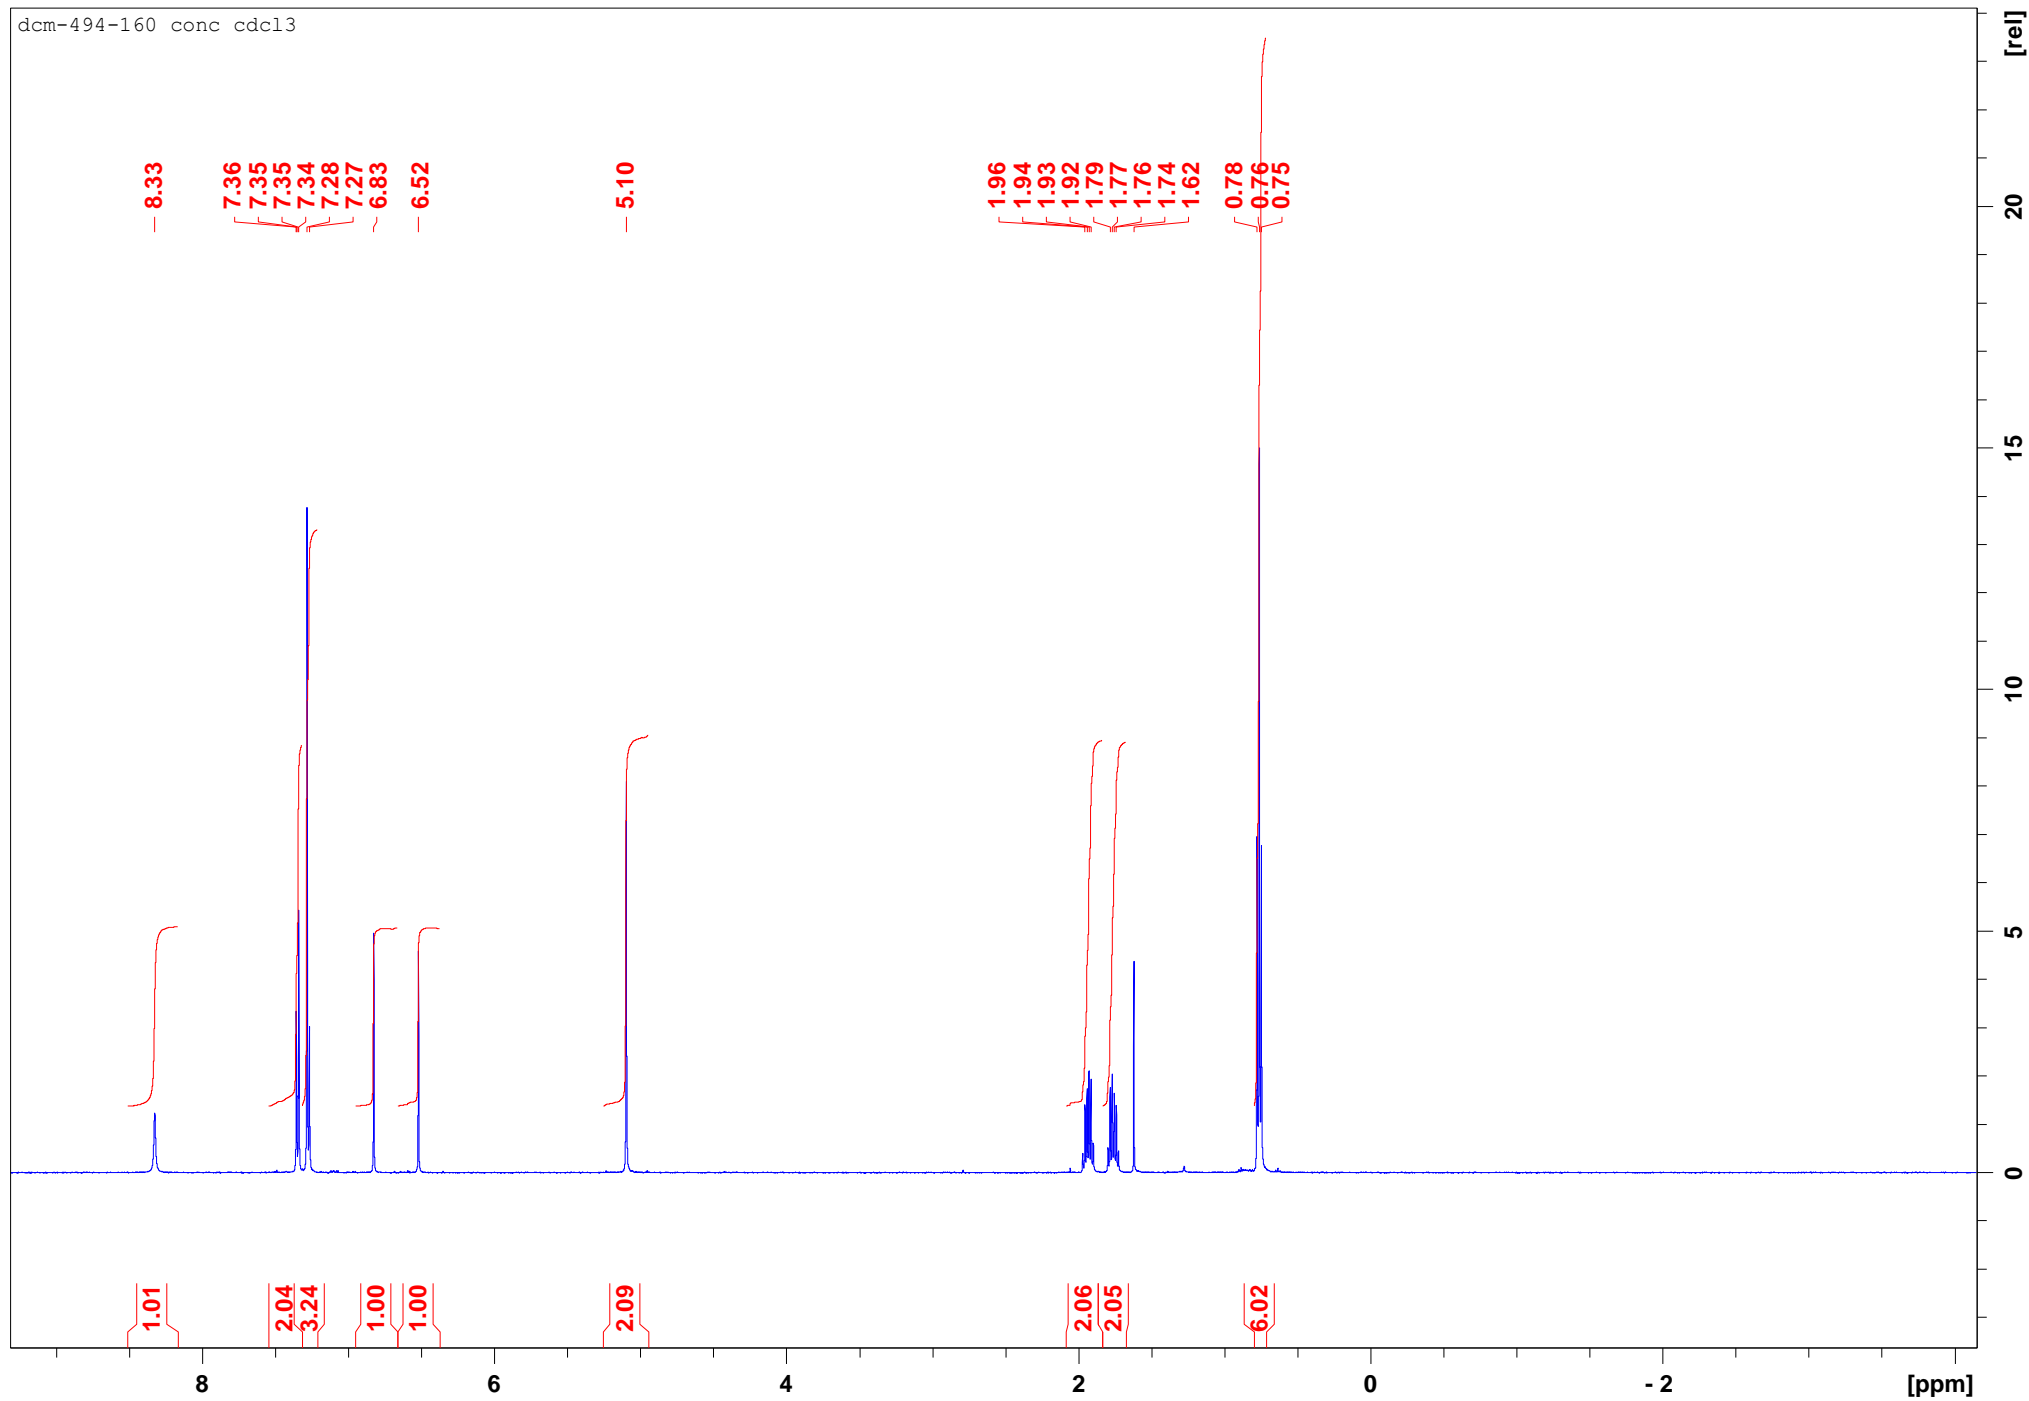

16a

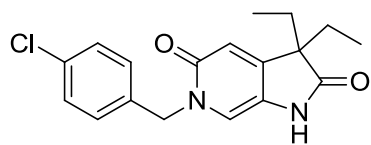

"dcm-494-160 conc cdcl3" 13 1 X:\data\DCM\nmr

dcm-494-160 conc cdcl3

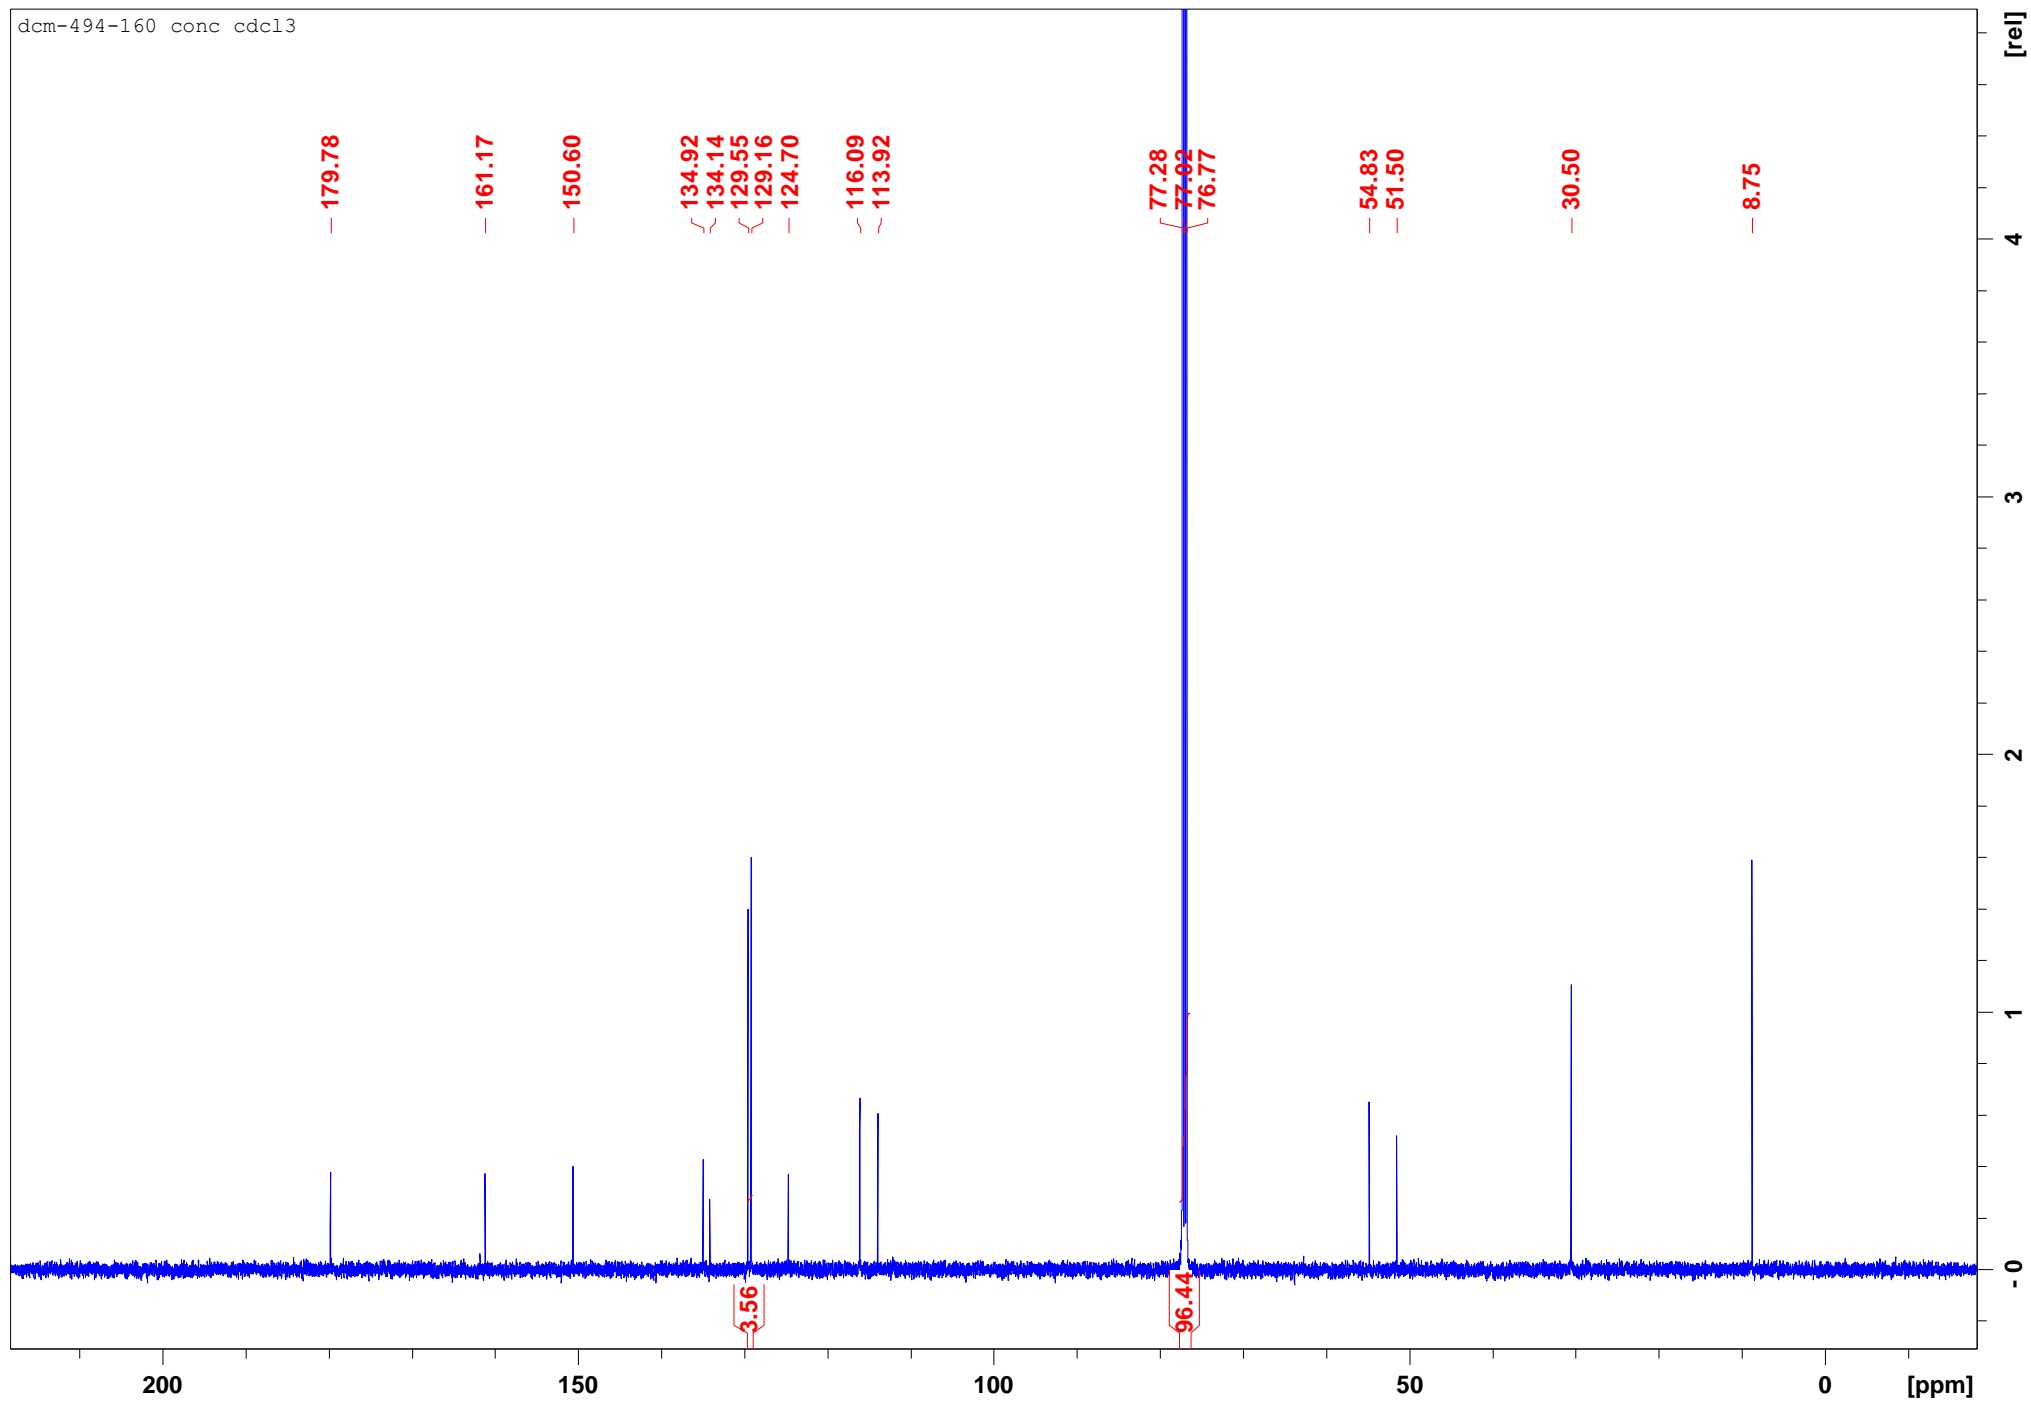

16b

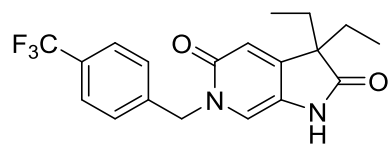

"DCM-494-180-A CDCL3 CONC" 10 1 X:\data\DCM\nmr

DCM-494-180-A CDCL3 CONC

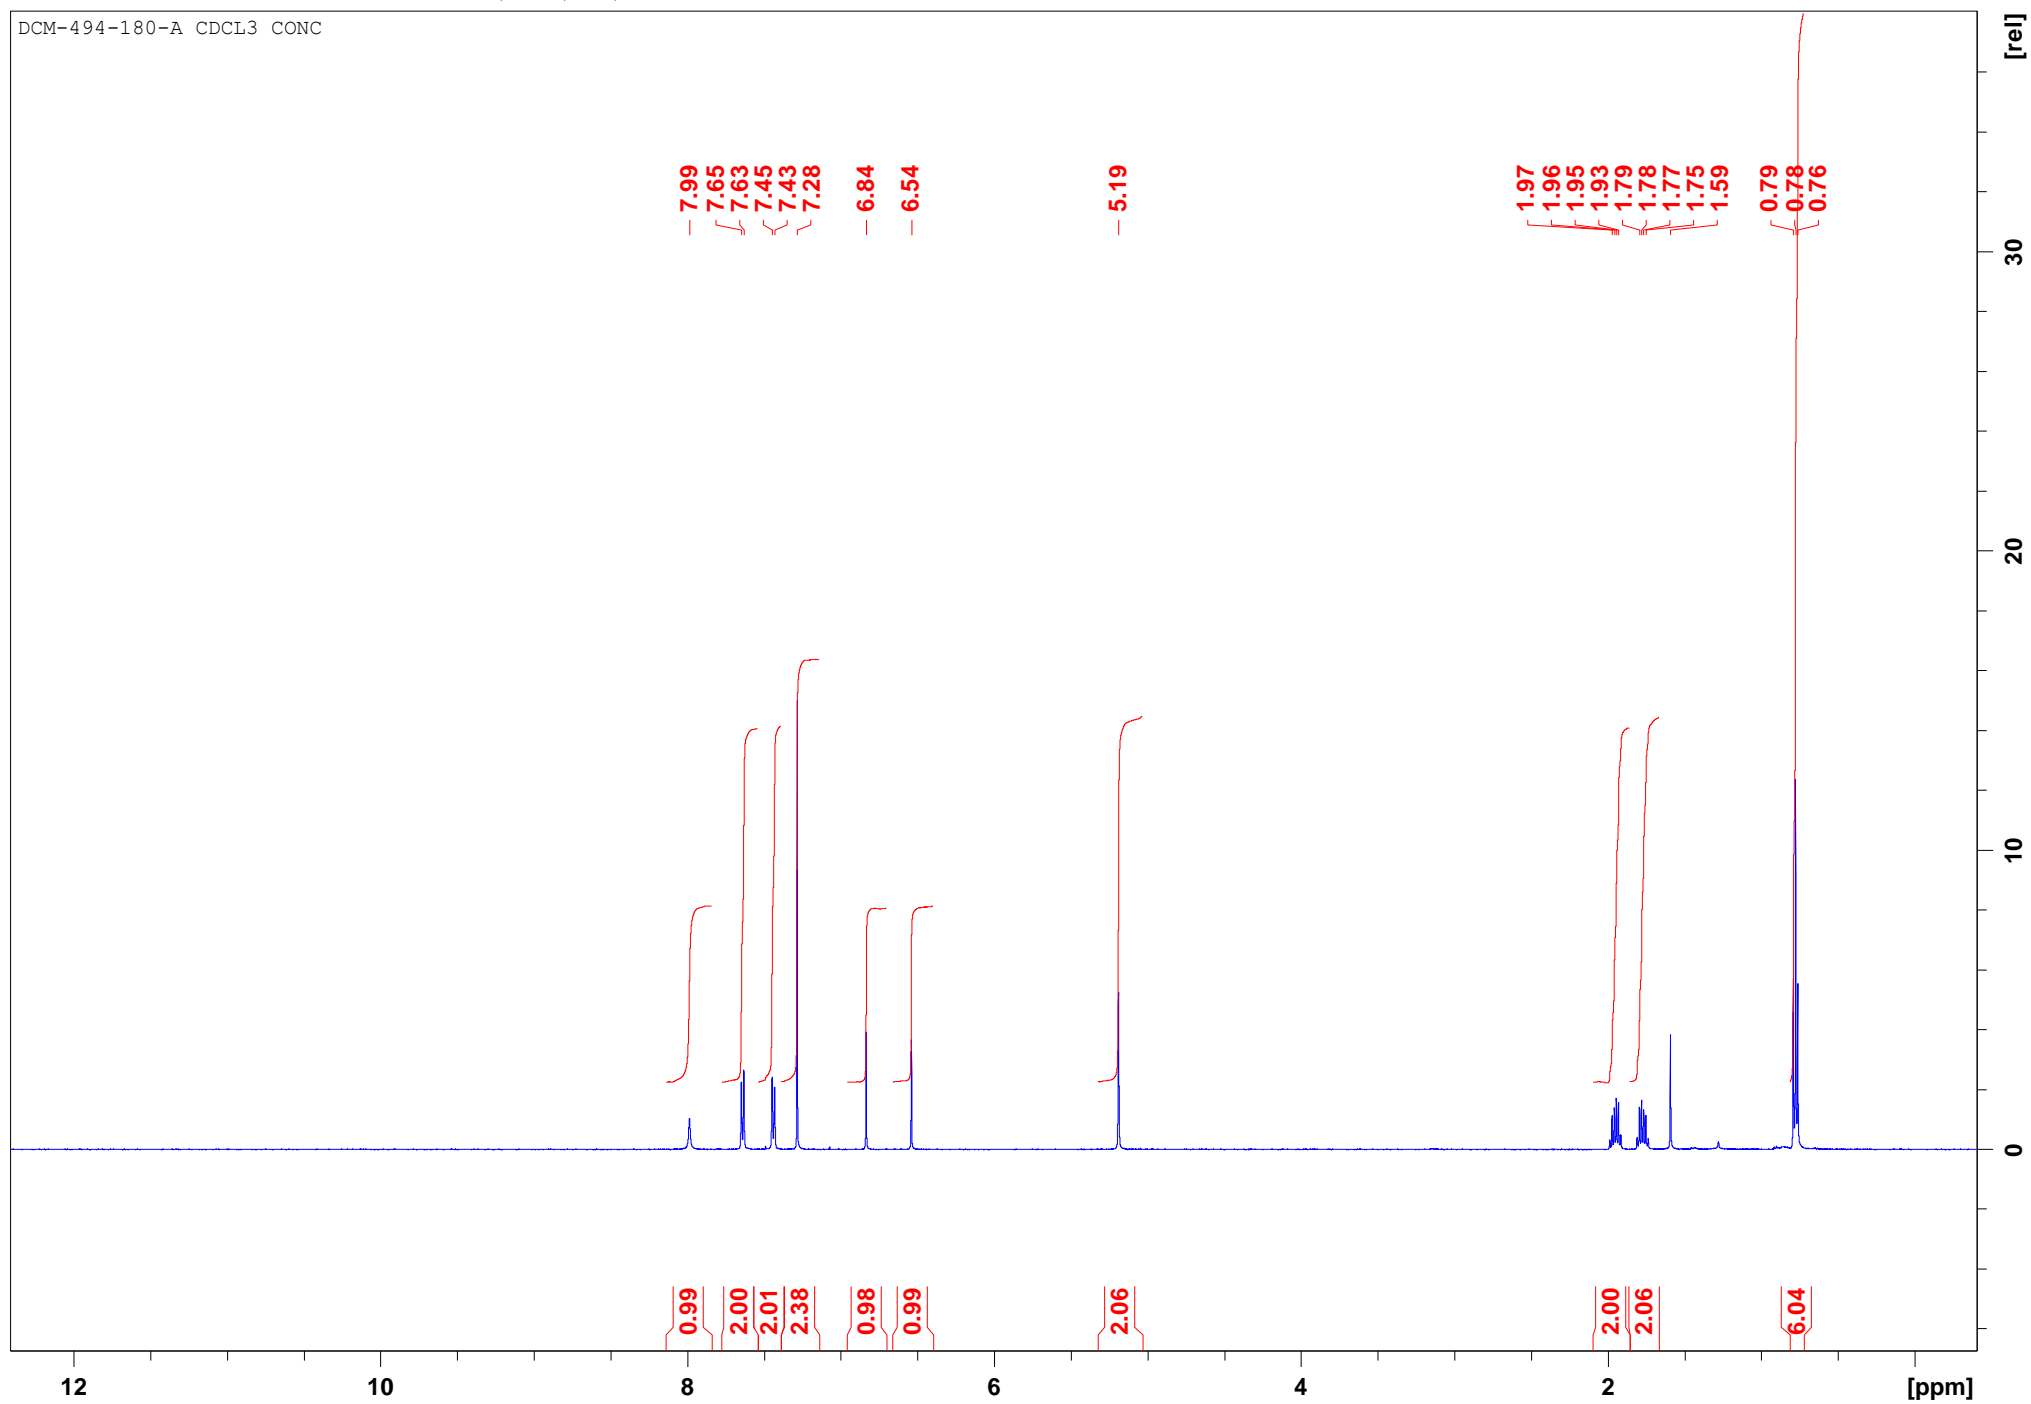

16b

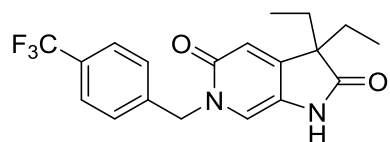

"DCM-494-180-A CDCL3 CONC" 16 1 X:\data\DCM\nmr

DCM-494-180-A CDCL3 CONC

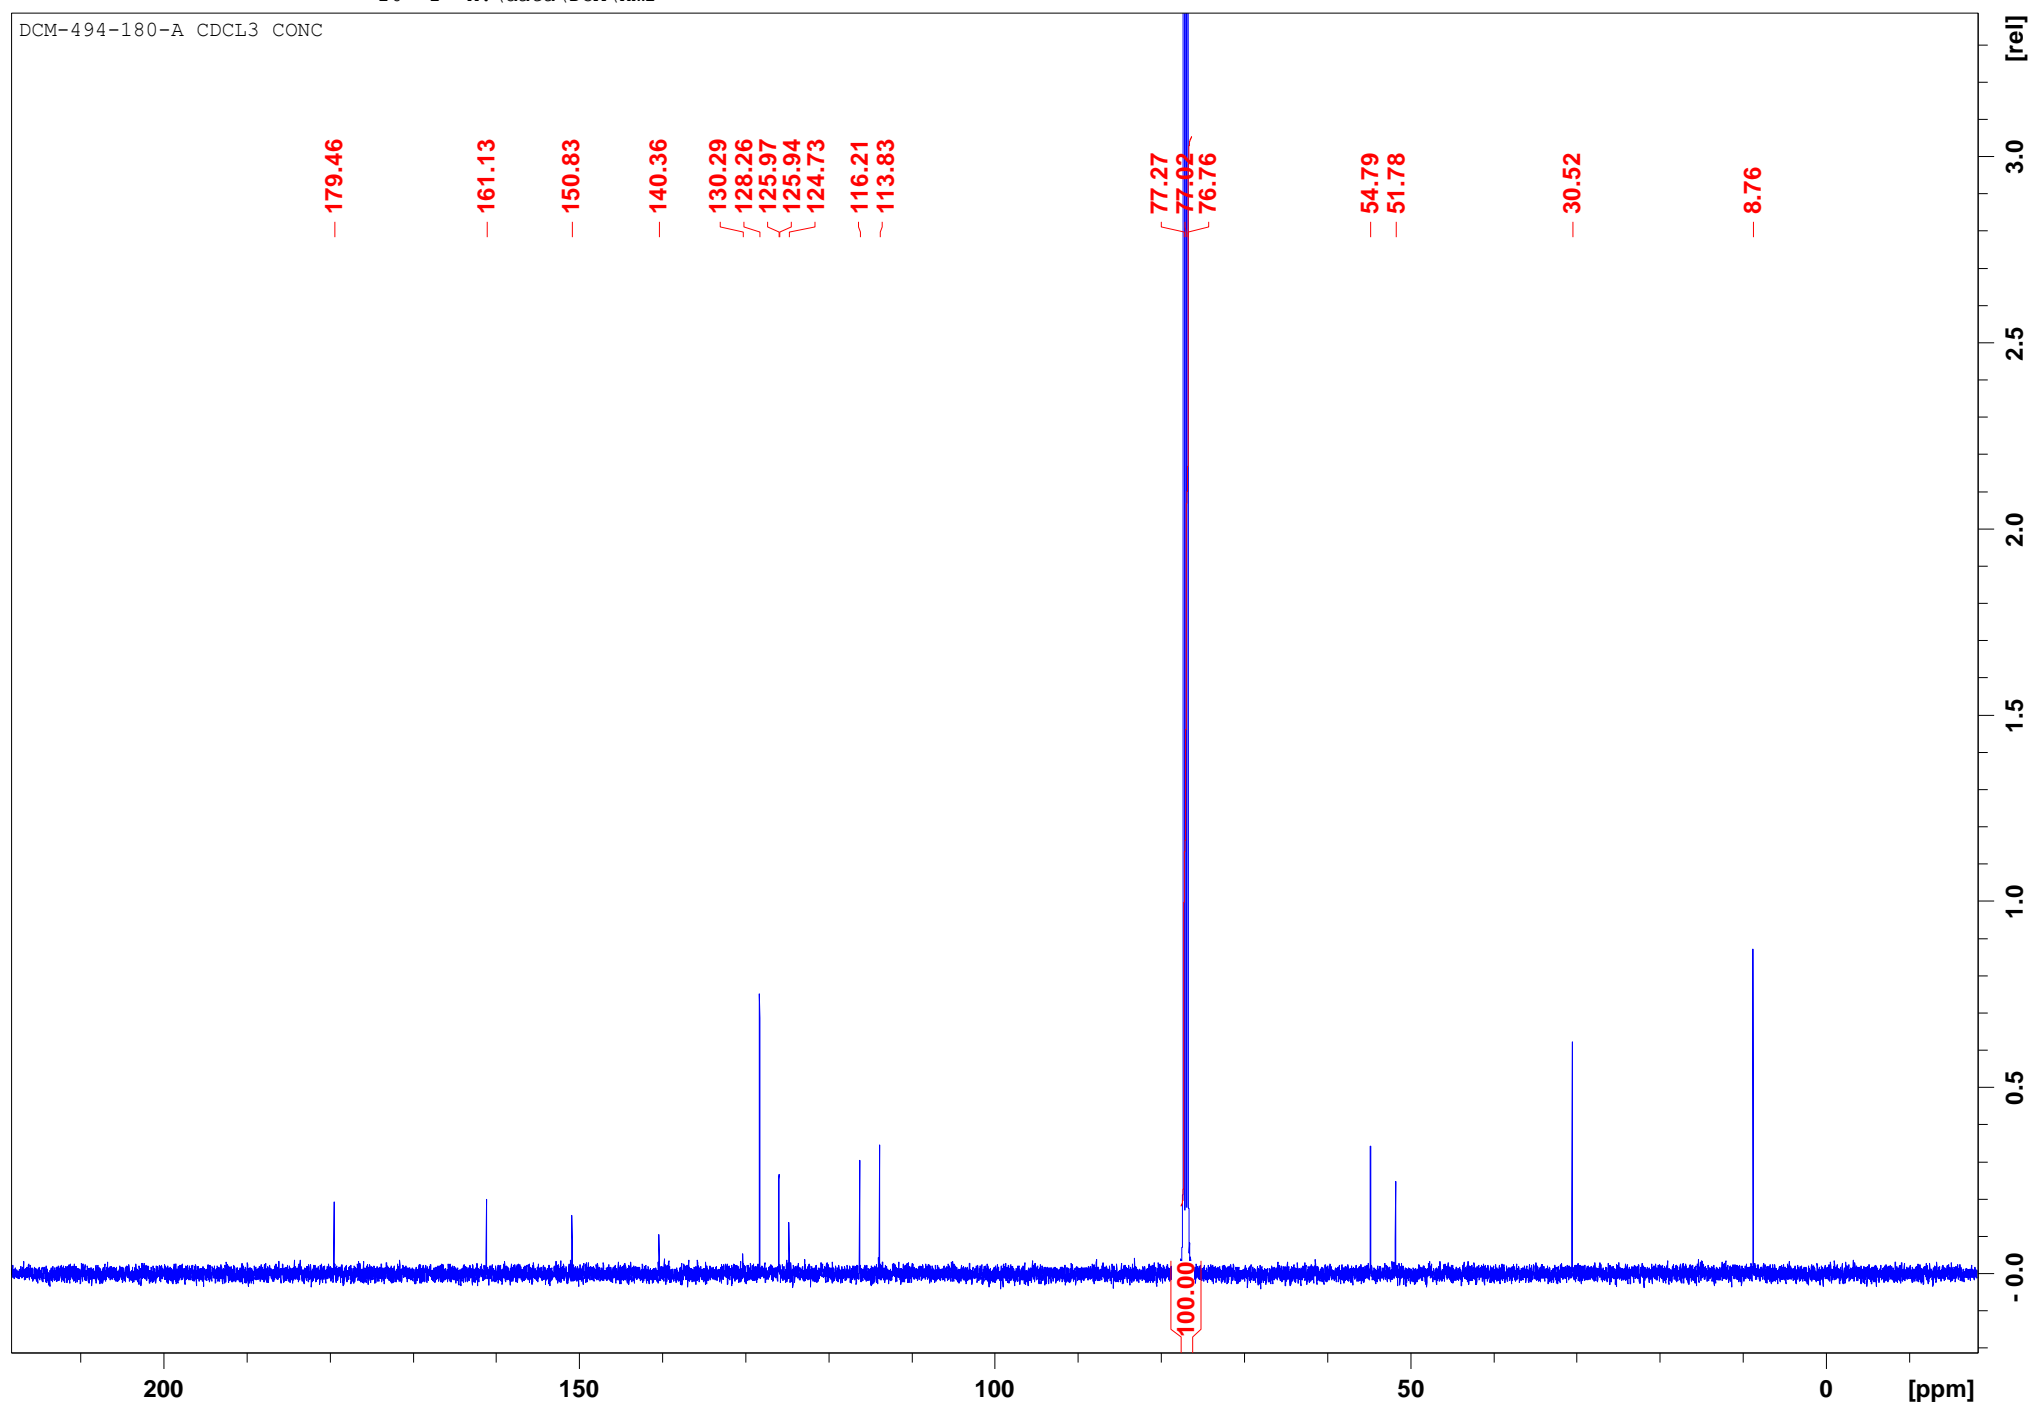

17a

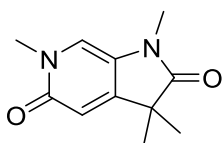

CD3OD

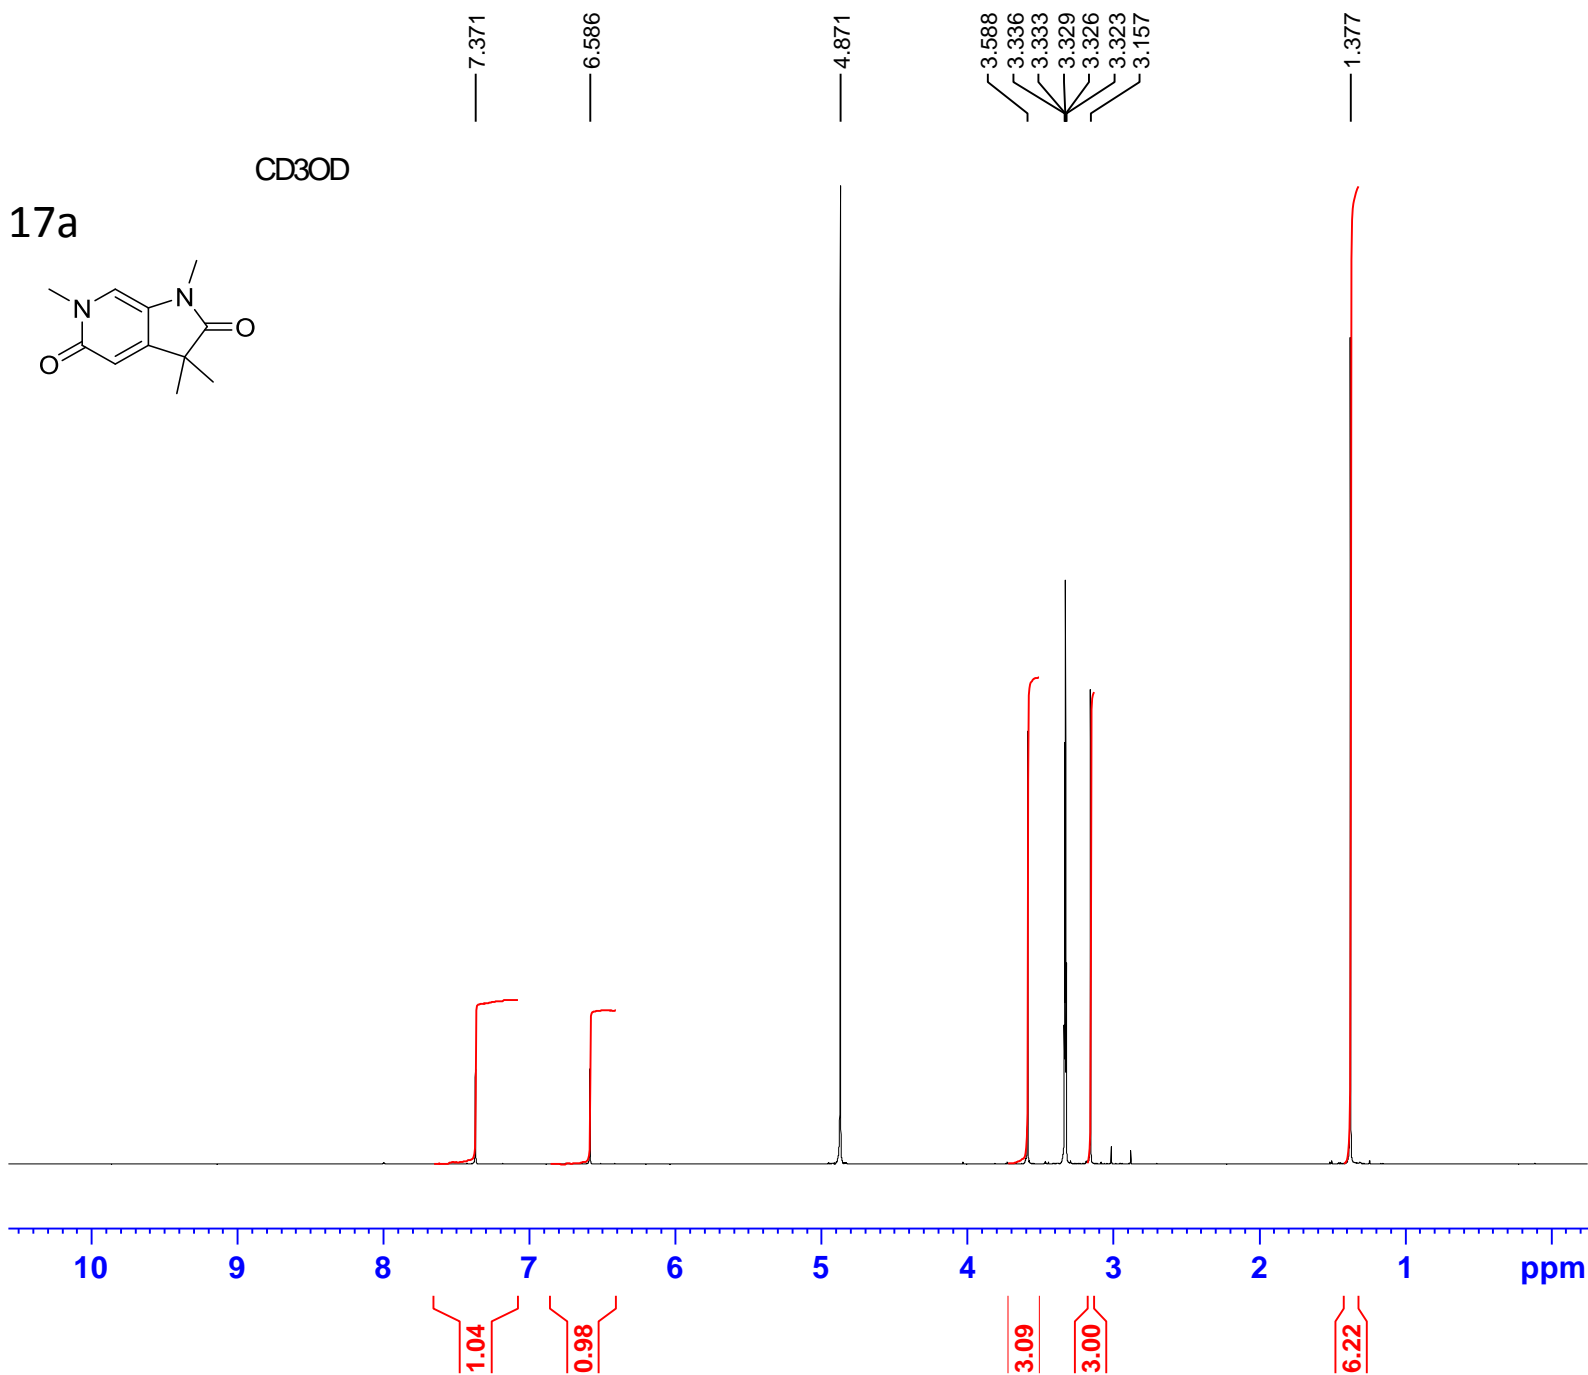

Current Data  
 NAME DCM-494-23-A CD3OD  
 EXPNO 10  
 PROCNO 1

F2 - Acquisition  
 Parameters 20140908  
 Time 13.35  
 INSTRUM spect  
 PROBHD 5 mm PABBO BB-  
 PULPROG zg30  
 TD 65536  
 SOLVENT MeOD  
 NS 16  
 DS 0  
 SWH 10330.578 Hz  
 FIDRES 0.157632 Hz  
 AQ 3.1719425 sec  
 RG 575  
 DW 48.400 usec  
 DE 11.99 usec  
 TE 297.9 K  
 D1 1.00000000 sec  
 TDO 1

===== CHANNEL f1 =====  
 SFO1 500.3030896 MHz  
 NUC1 1H  
 P1 16.25 usec  
 PLW1 18.33600044 W

F2 - Processing parameters SI  
 65536  
 SF 500.3000000 MHz  
 WDW EM  
 SSB 0  
 LB 0.30 Hz  
 GB 0  
 PC 1.00

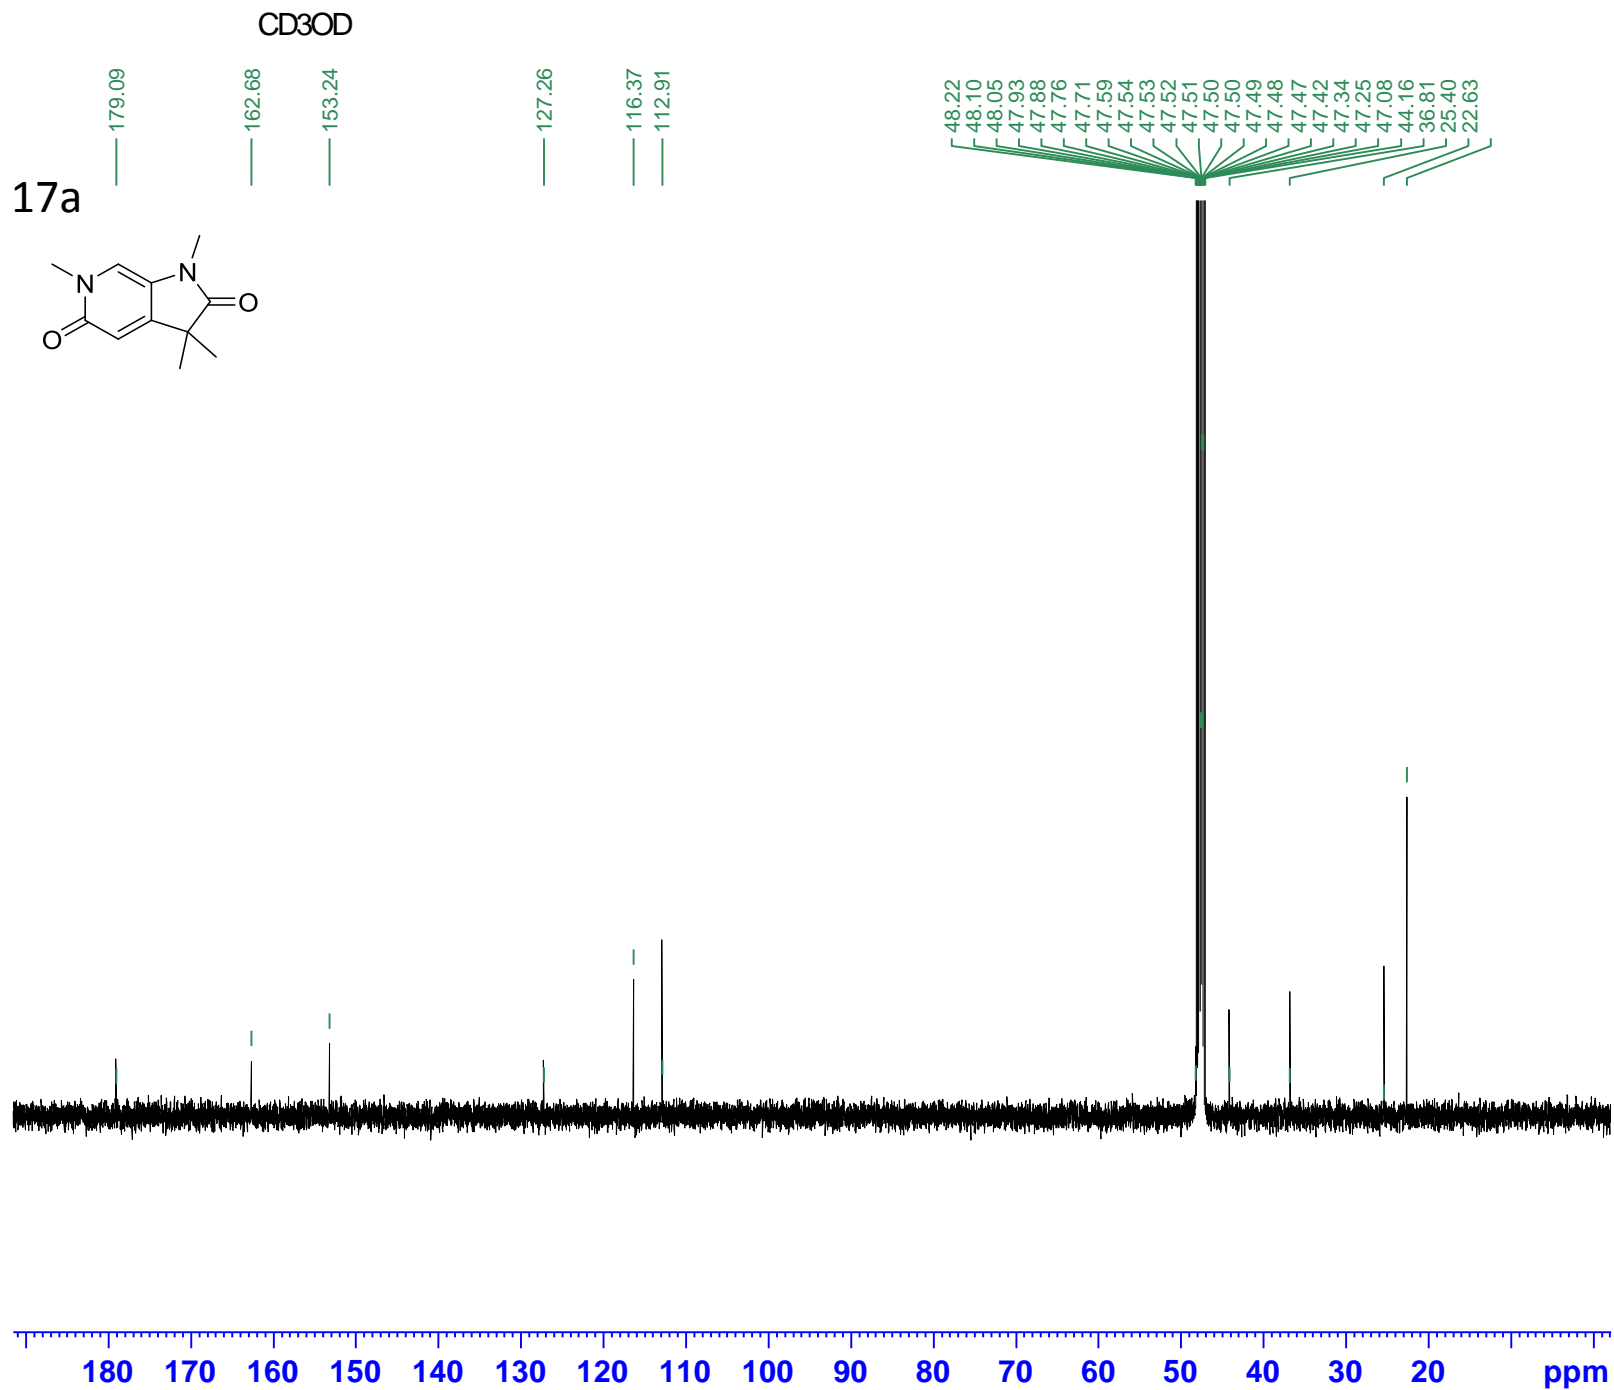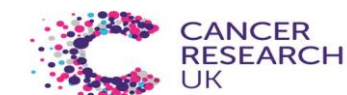

Current Data Parameters  
 NAME DCM-494-23-A CD3OD  
 EXPNO 11  
 PROCNO 1

F2 - Acquisition  
 Parameters Date\_ 20140909  
 Time 2.00  
 INSTRUM spect  
 PROBHD 5 mm PABBO BB-  
 PULPROG zgpg30  
 TD 65536  
 SOLVENT MeOD  
 NS 2048  
 DS 2  
 S/MH 29761.904 Hz  
 FIDRES 0.454131 Hz  
 AQ 1.1010048 sec  
 RG 456  
 DW 16.800 usec  
 DE 7.68 usec  
 TE 298.0 K  
 D1 2.0000000 sec  
 D11 0.0300000 sec  
 TD0 1

===== CHANNEL f1 =====

SFO1 125.8131151 MHz  
 NUC1 13C  
 P1 9.75 usec  
 PLW1 82.38999939 W

===== CHANNEL f2 =====

SFO2 500.3020012 MHz  
 NUC2 1H  
 CPDPRG[2] waltz16  
 PCPD2 80.00 usec  
 PLW2 18.33600044 W  
 PLW12 0.75654000 W  
 PLW13 0.48418999 W

F2 - Processing  
 Parameters 65536  
 SF 125.8005350 MHz  
 WDW EM  
 SSB 0  
 LB 1.00 Hz  
 GB 0  
 PC 1.40



17b

CDCl<sub>3</sub>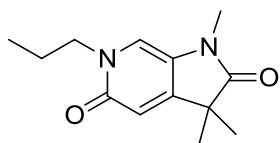

7.260  
6.665  
6.497  
6.496  
3.900  
3.885  
3.870  
3.113  
1.365  
1.010  
0.995  
0.980

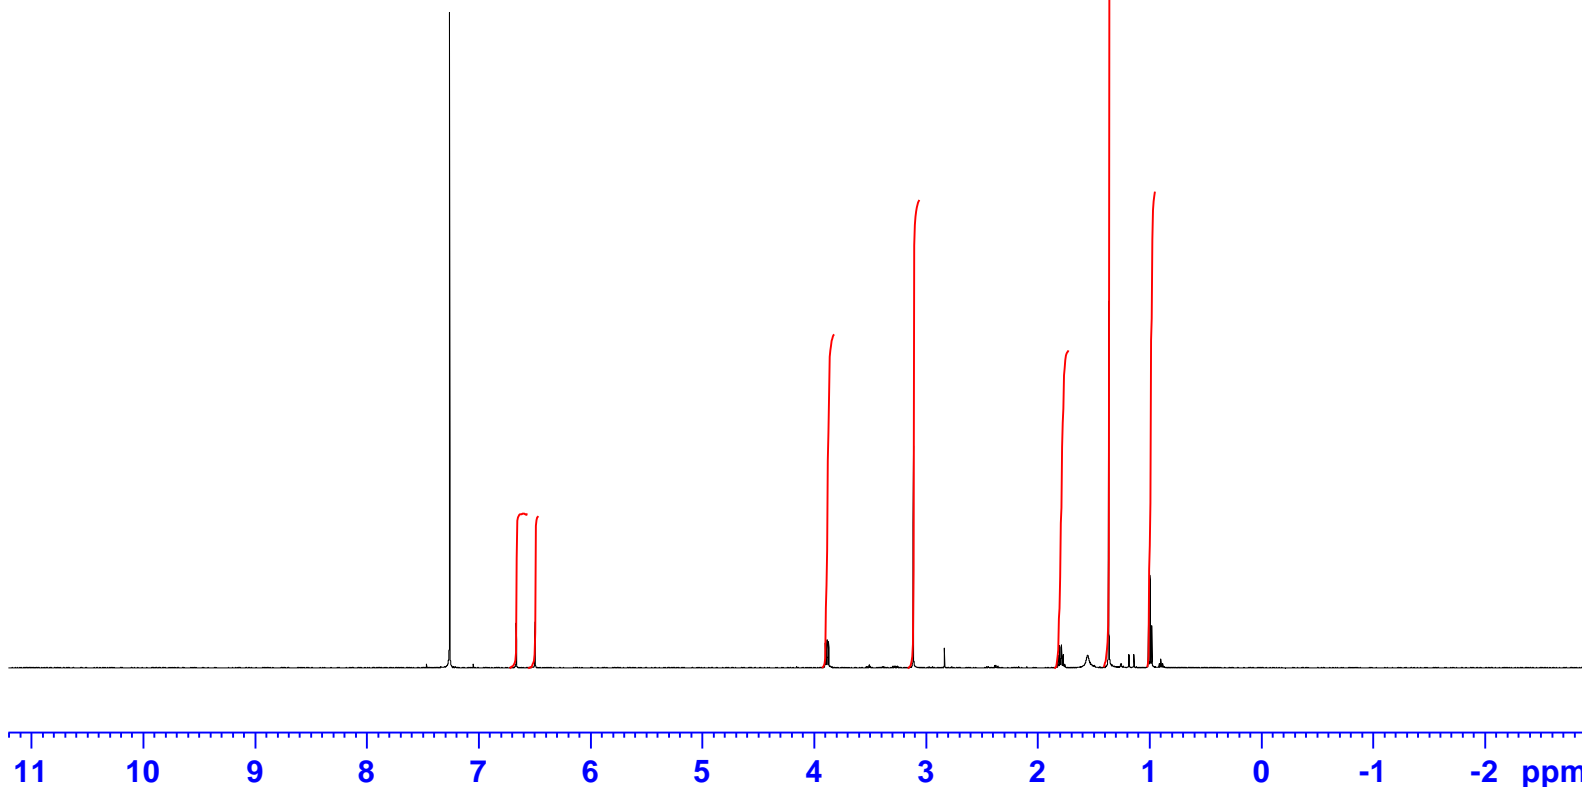

11 10 9 8 7 6 5 4 3 2 1 0 -1 -2 ppm

1.00  
0.98  
2.16  
3.04  
2.06  
6.33  
3.10

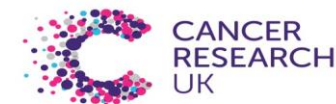

Current Data  
NAME DCM-494-115-A CDCl<sub>3</sub>  
EXPNO 10  
PROCNO 1

F2 - Acquisition  
Date\_ 20141126  
Time 9.59  
INSTRUM spect  
PROBHD 5 mm PABBO BB-  
PULPROG zg30  
TD 65536  
SOLVENT CDCl<sub>3</sub>  
NS 16  
DS 0  
SWH 10330.578 Hz  
FIDRES 0.157632 Hz  
AQ 3.1719425 sec  
RG 812  
DW 48.400 usec  
DE 11.99 usec  
TE 298.0 K  
D1 1.00000000 sec  
TDO 1

===== CHANNEL f1 =====  
SFO1 500.3030896 MHz  
NUC1 1H  
P1 16.25 usec  
PLW1 18.33600044 W

F2 - Processing parameters SI  
65536  
SF 500.3000123 MHz  
WDW EM  
SSB 0  
LB 0.30 Hz  
GB 0  
PC 1.00

17b

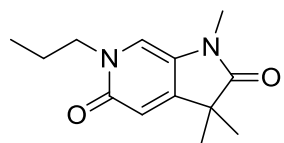CDCL<sub>3</sub>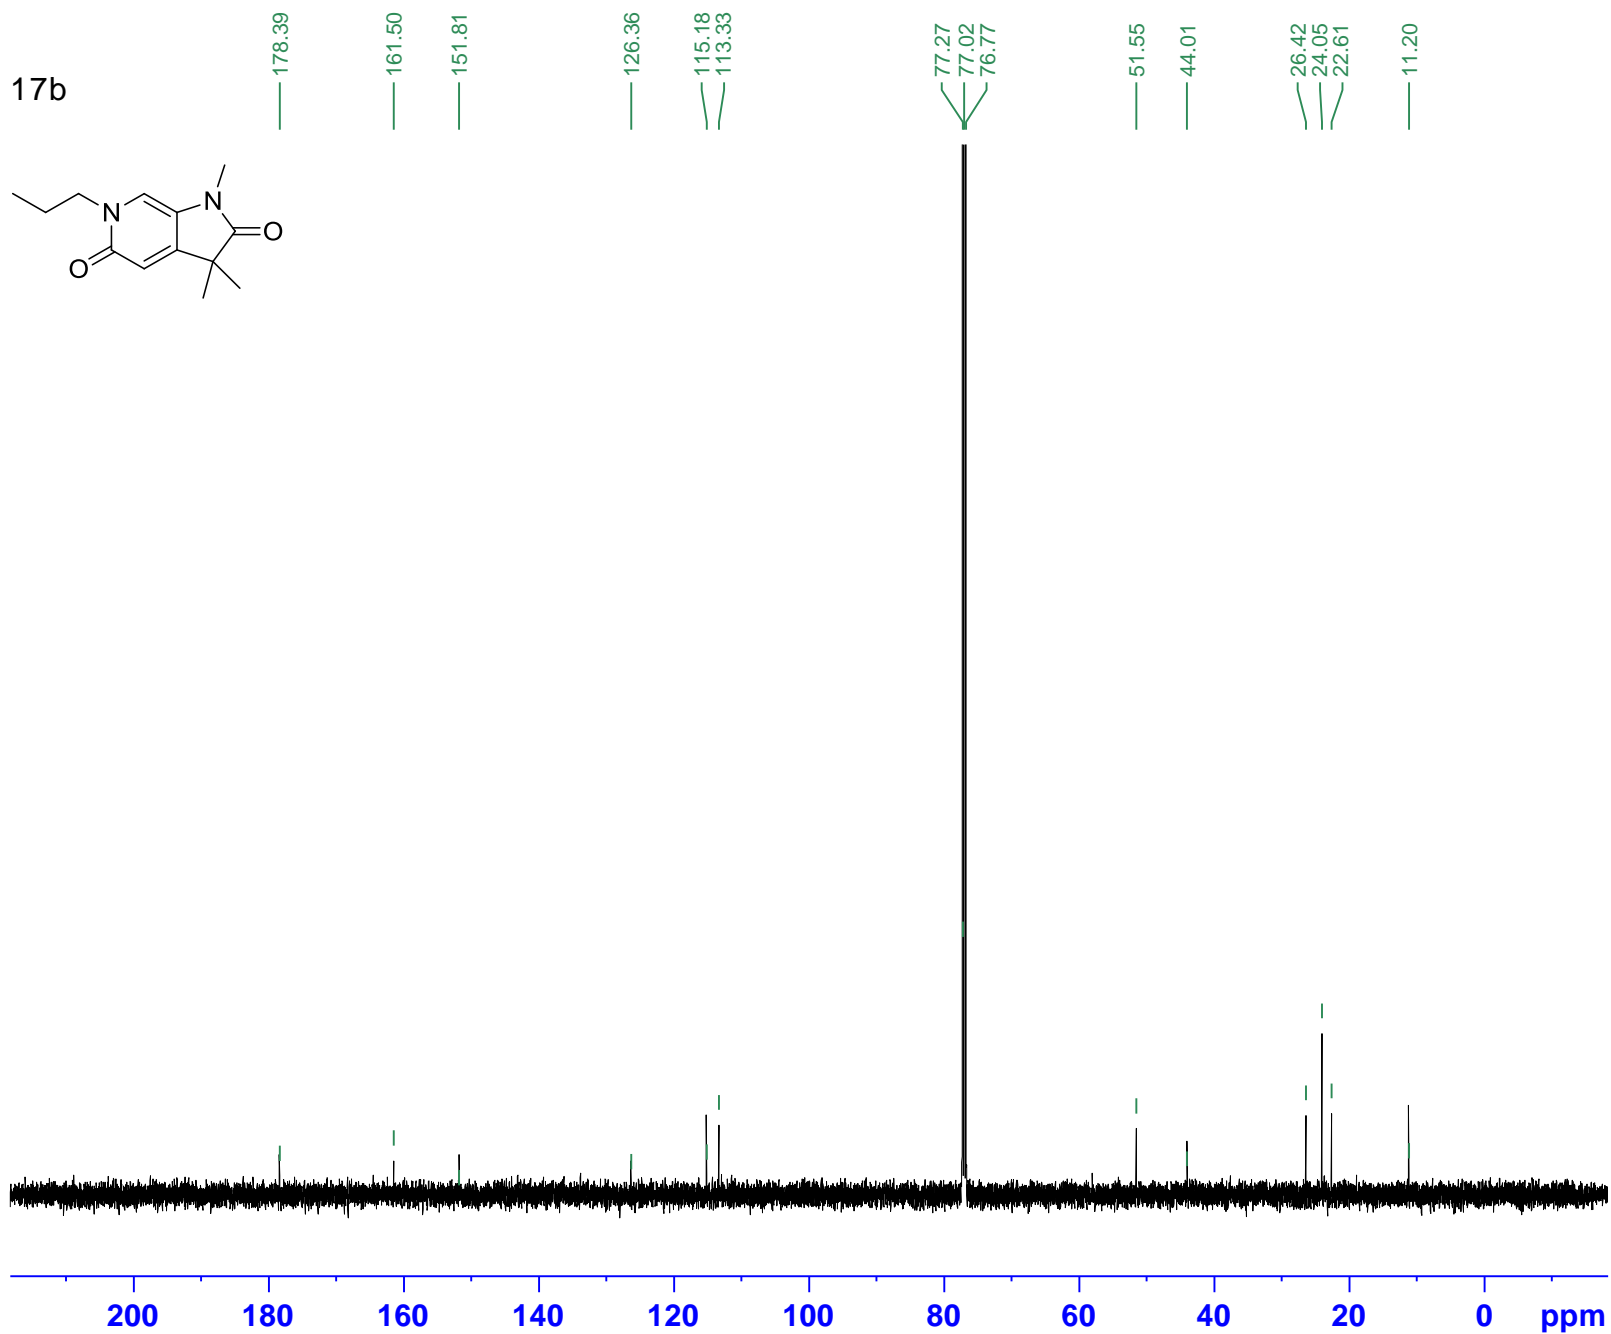

Current Data Parameters  
 NAME DCM-494-114-A CDCL<sub>3</sub>  
 EXPNO 11  
 PROCNO 1

F2 - Acquisition  
 Parameters Date\_ 20141209  
 Time 12.25  
 INSTRUM spect  
 PROBHD 5 mm PABBO BB-  
 PULPROG zgpg30  
 TD 65536  
 SOLVENT CDCl<sub>3</sub>  
 NS 256  
 DS 2  
 S/MH 29761.904 Hz  
 FIDRES 0.454131 Hz  
 AQ 1.1010048 sec  
 RG 575  
 DW 16.800 usec  
 DE 7.68 usec  
 TE 298.0 K  
 D1 2.0000000 sec  
 D11 0.03000000 sec  
 TD0 1

===== CHANNEL f1 =====

SFO1 125.8131151 MHz  
 NUC1 13C  
 P1 9.75 usec  
 PLW1 82.38999939 W

===== CHANNEL f2 =====

SFO2 500.3020012 MHz  
 NUC2 1H  
 CPDPRG[2] waltz16  
 PCPD2 80.00 usec  
 PLW2 18.33600044 W  
 PLW12 0.75654000 W  
 PLW13 0.48418999 W

F2 - Processing  
 Parameters 65536  
 SF 125.8005350 MHz  
 WDW EM  
 SSB 0  
 LB 1.00 Hz  
 GB 0  
 PC 1.40

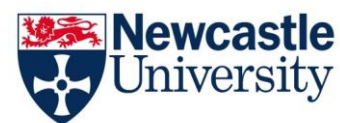

17c

CDCl<sub>3</sub>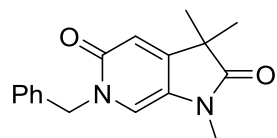7.375  
7.358  
7.2856.668  
6.575

5.169

3.065

1.634

1.391

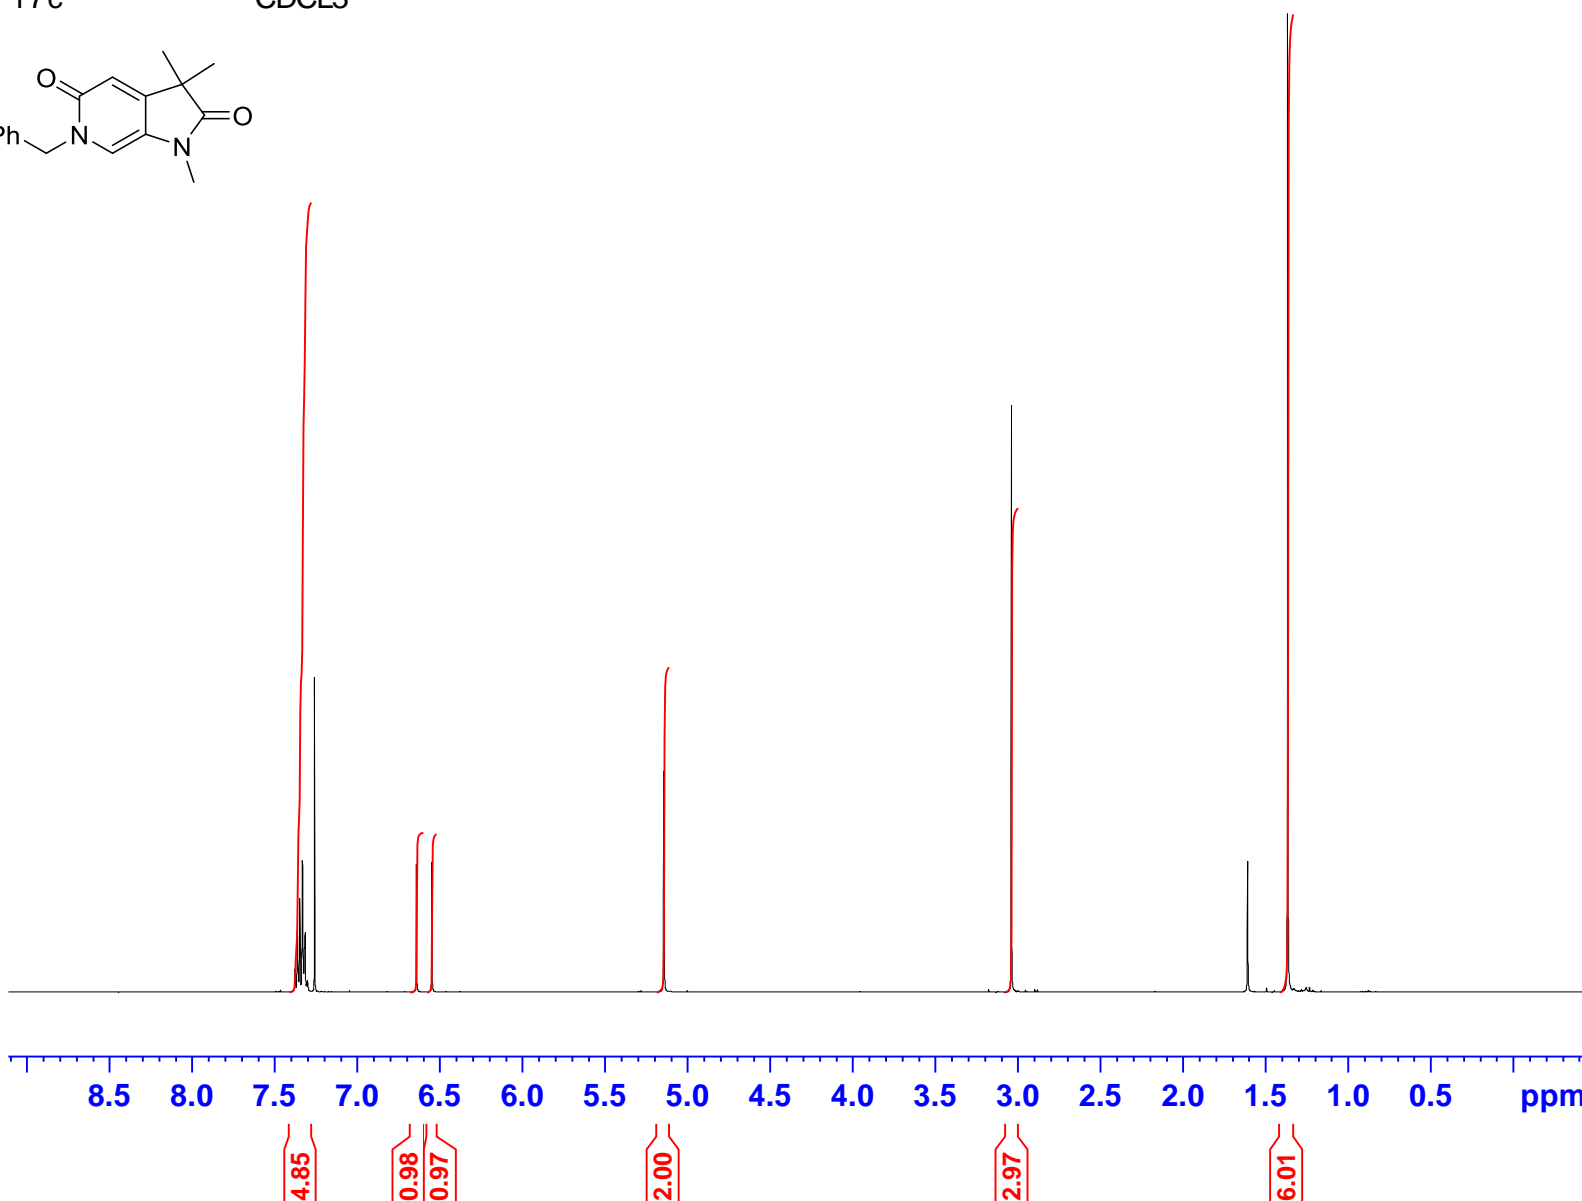

Current Data Parameters  
NAME DCM-494-75-A CDCl<sub>3</sub> CONC  
EXPNO 11  
PROCNO 1

F2 - Acquisition  
Parameters 20141029  
Time 8.38  
INSTRUM spect  
PROBHD 5 mmPABBO BB-  
PULPROG zg30  
TD 65536  
SOLVENT CDCl<sub>3</sub>  
NS 16  
DS 0  
SMH 10330.578 Hz  
FIDRES 0.157632 Hz  
AQ 3.1719425 sec  
RG 575  
DV 48.400 usec  
DE 11.99 usec  
TE 298.1 K  
D1 1.00000000 sec  
TD0 1

===== CHANNEL f1 =====  
SFO1 500.3030896 MHz  
NUC1 1H  
P1 16.25 usec  
PLW1 18.33600044 W

F2 - Processing  
Parameters 65536  
S 500.3000125 MHz  
WDW EM  
SSB 0  
LB 0.30 Hz  
GB 0  
PC 1.00

17c

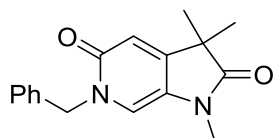CDCL<sub>3</sub>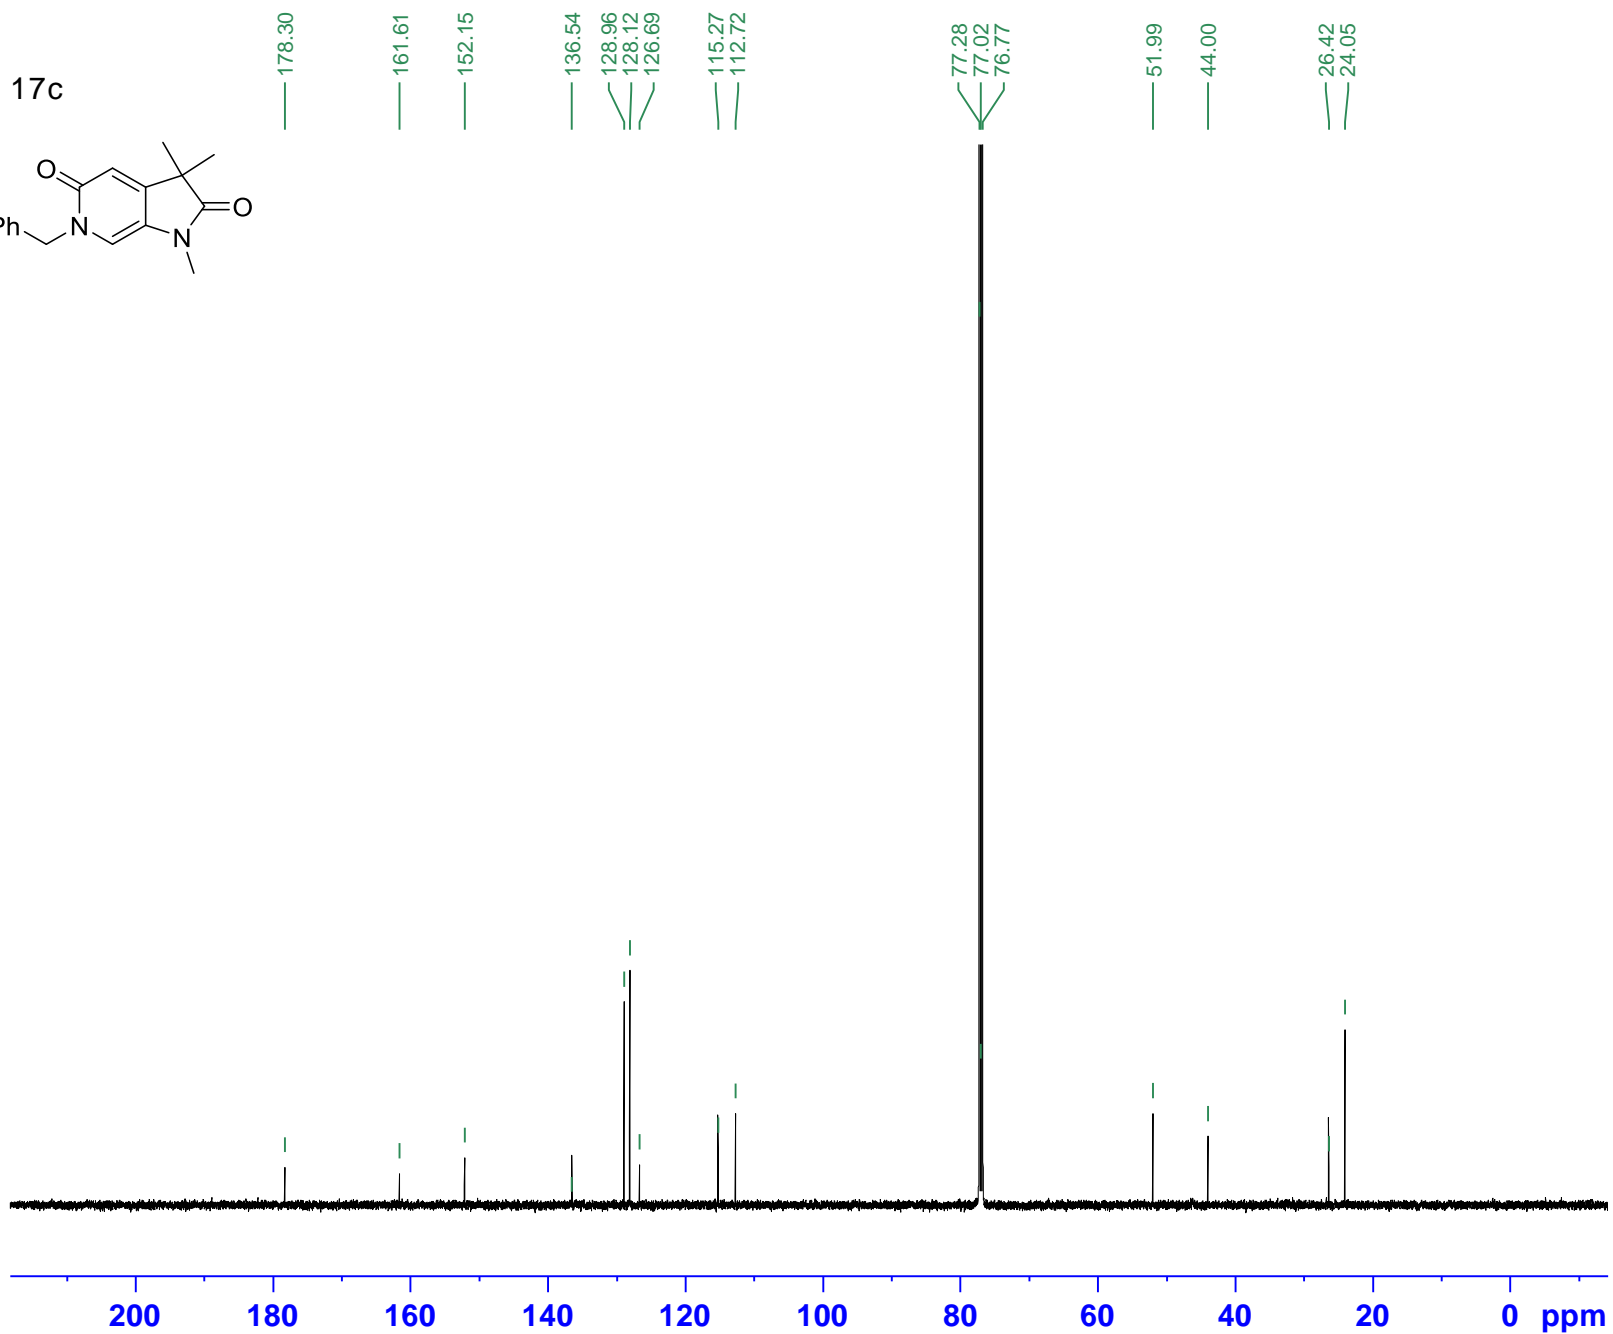

Current Data Parameters  
 NAME DCM-494-75-A CDCL<sub>3</sub> CONC  
 EXPNO 10  
 PROCNO 1

F2 - Acquisition Parameters  
 Date\_Time 20141029  
 Time 6.35  
 INSTRUM spect  
 PROBHD 5 mmPABBO BB-  
 PULPROG zgpg30  
 TD 65536  
 SOLVEN CDCL<sub>3</sub>  
 TNS 2048  
 DS 2  
 SMH 29761.904 Hz  
 FIDRES 0.454131 Hz  
 AQ 1.1010048 sec  
 RG 575  
 DW 16.800 usec  
 DE 7.68 usec  
 TE 298.0 K  
 D1 2.0000000 sec  
 D11 0.0300000 sec  
 TD0 1

===== CHANNEL f1 =====  
 SFO1 125.8131151 MHz  
 NUC1 13C  
 P1 9.75 usec  
 PLW1 82.3899939 W

===== CHANNEL f2 =====  
 SFO2 500.3020012 MHz  
 NUC2 1H  
 CPDPRG2 waltz16  
 PCPD2 80.00 usec  
 PLW2 18.33600044 W  
 PLW12 0.75654000 W  
 PLW13 0.48418999 W

F2 - Processing parameters  
 S1 65536  
 SF 125.8005350 MHz  
 VDW EM  
 SSB 0  
 LB 1.00 Hz  
 GB 0  
 PC 1.40

17d

CDCL<sub>3</sub>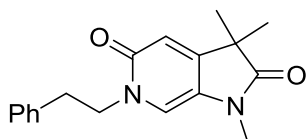

7.288  
7.273  
7.259  
7.192  
7.189  
7.176  
— 6.509  
— 6.258  
— 5.298  
4.148  
4.134  
4.119  
3.057  
2.933  
1.568  
1.354

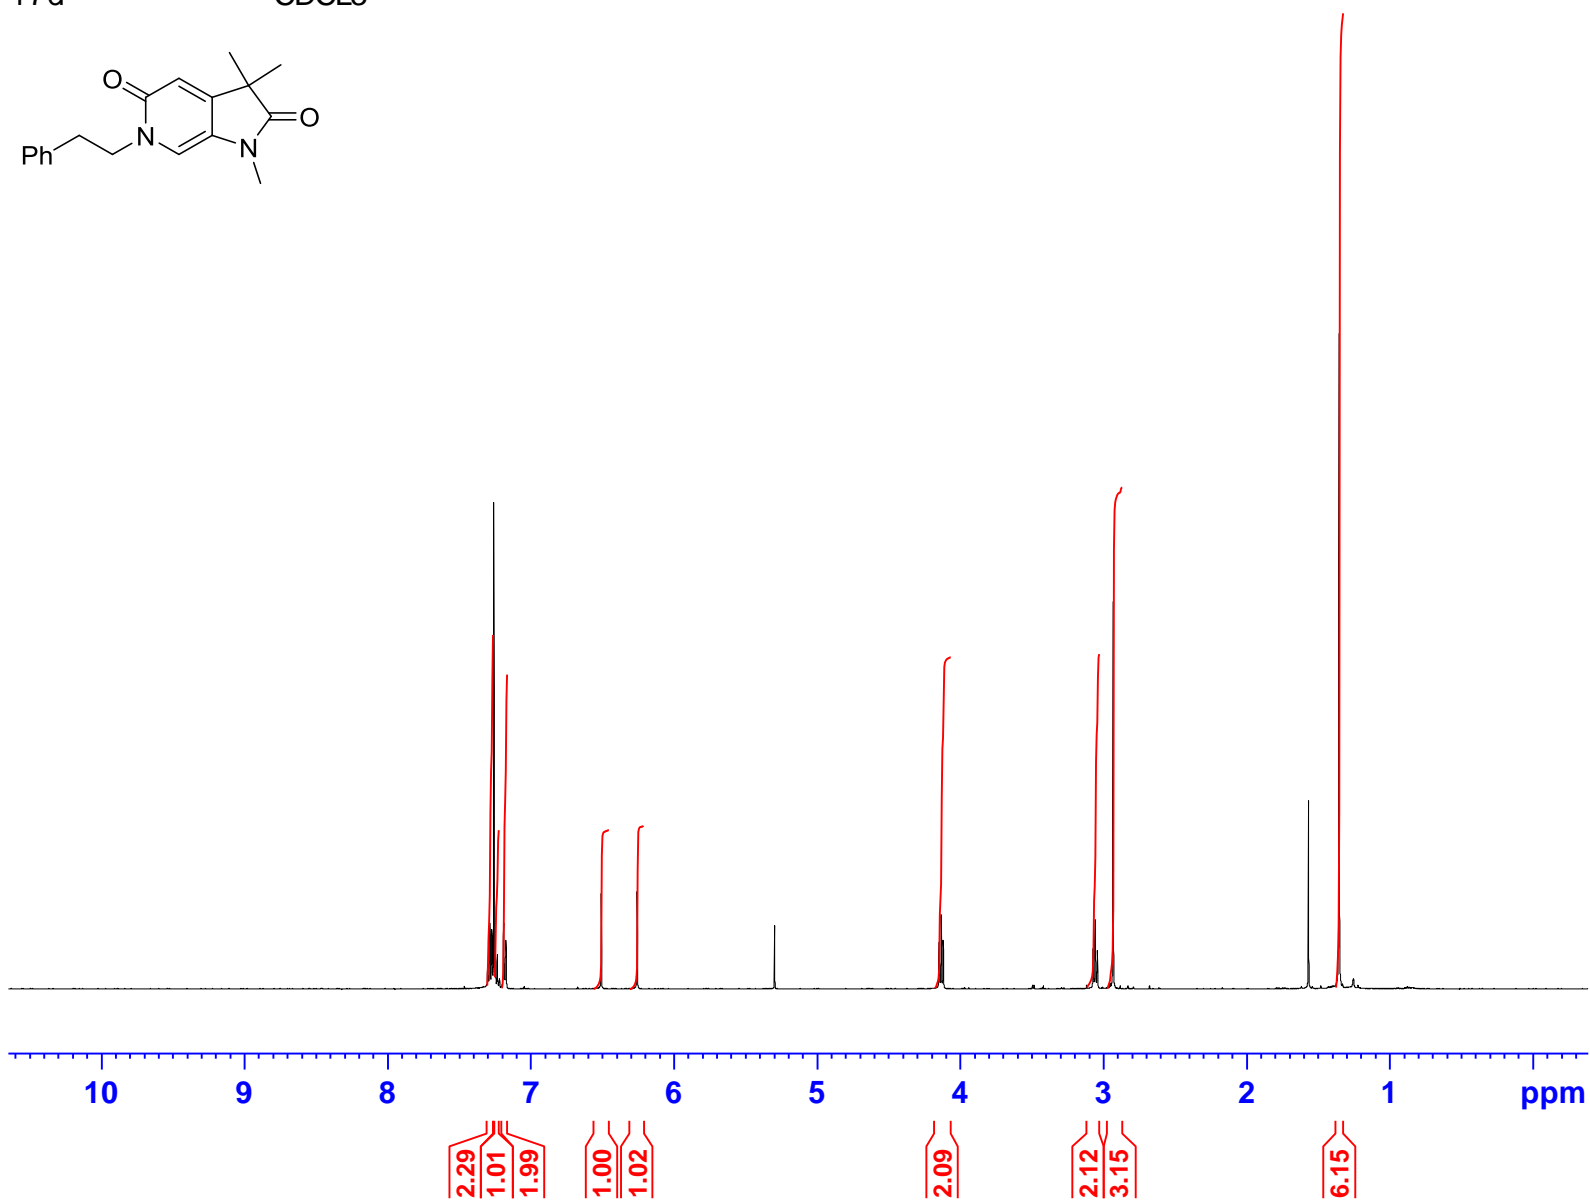

Current Data  
NAME DCM-494-103-A CDCL<sub>3</sub>  
EXPNO 10  
PROCNO 1

F2 - Acquisition  
Date\_ 20141119  
Time 16.56  
INSTRUM spect  
PROBHD 5 mm PABBO BB-  
PULPROG zg30  
TD 65536  
SOLVENT CDCl<sub>3</sub>  
NS 16  
DS 0  
SWH 10330.578 Hz  
FIDRES 0.157632 Hz  
AQ 3.1719425 sec  
RG 645  
DW 48.400 usec  
DE 11.99 usec  
TE 298.0 K  
D1 1.00000000 sec  
TDO 1

===== CHANNEL f1 =====  
SFO1 500.3030896 MHz  
NUC1 1H  
P1 16.25 usec  
PLW1 18.33600044 W

F2 - Processing parameters SI  
65536  
SF 500.3000126 MHz  
WDW EM  
SSB 0  
LB 0.30 Hz  
GB 0  
PC 1.00

17d

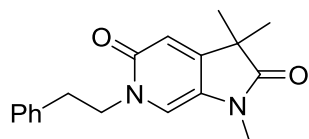CDCL<sub>3</sub>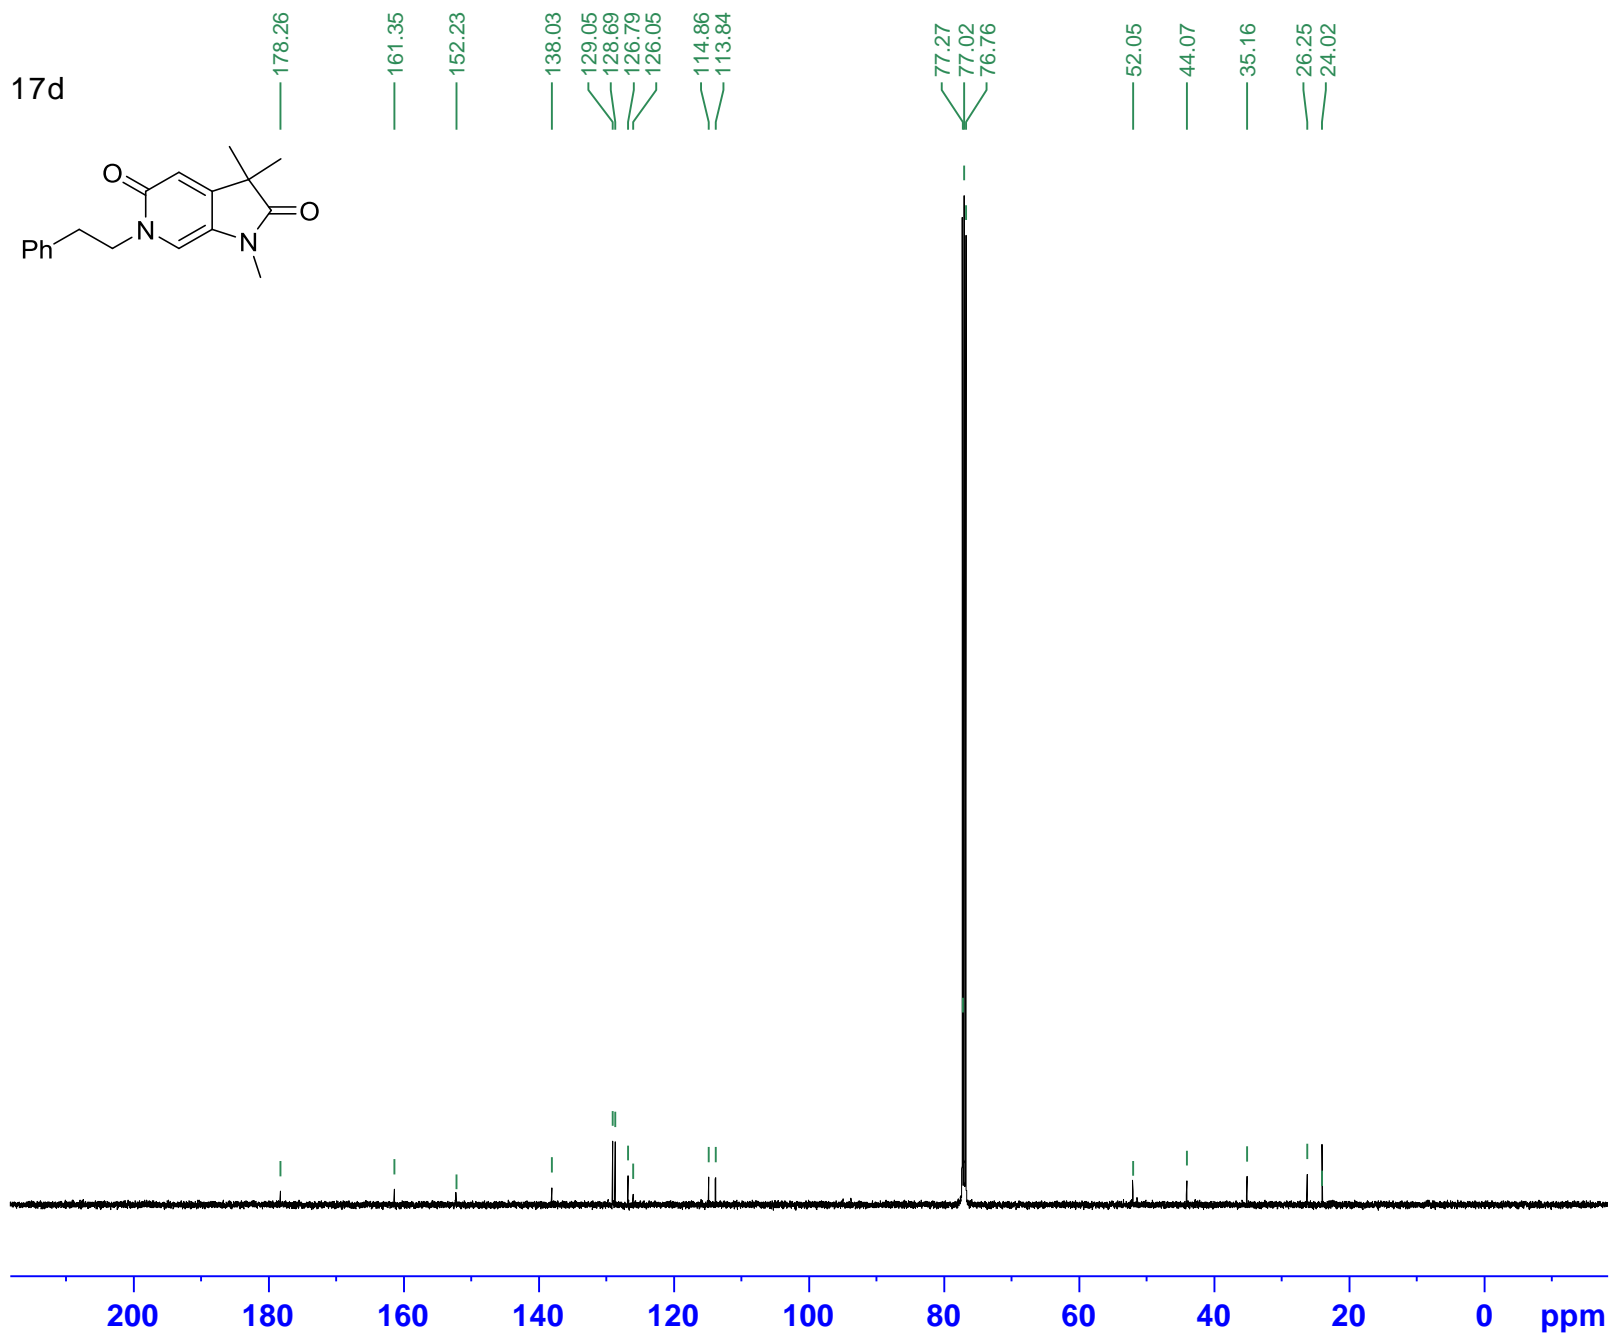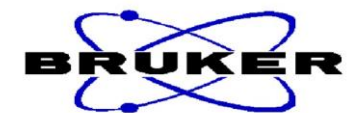

Current Data Parameters  
 NAME DCM-494-103-A CDCL<sub>3</sub>  
 EXPNO 14  
 PROCNO 1

F2 - Acquisition  
 Parameters Date\_ 20141121  
 Time 1.04  
 INSTRUM spect  
 PROBHD 5 mm PABBO BB-  
 PULPROG zgpg30  
 TD 65536  
 SOLVENT CDCL<sub>3</sub>  
 NS 2048  
 DS 2  
 S/MH 29761.904 Hz  
 FIDRES 0.454131 Hz  
 AQ 1.1010048 sec  
 RG 456  
 DW 16.800 usec  
 DE 7.68 usec  
 TE 298.5 K  
 D1 2.0000000 sec  
 D11 0.0300000 sec  
 TD0 1

===== CHANNEL f1 =====

SFO1 125.8131151 MHz  
 NUC1 13C  
 P1 9.75 usec  
 PLW1 82.38999939 W

===== CHANNEL f2 =====

SFO2 500.3020012 MHz  
 NUC2 1H  
 CPDPRG[2] waltz16  
 PCPD2 80.00 usec  
 PLW2 18.33600044 W  
 PLW12 0.75654000 W  
 PLW13 0.48418999 W

F2 - Processing  
 Parameters 65536  
 SF 125.8005350 MHz  
 WDW EM  
 SSB 0  
 LB 1.00 Hz  
 GB 0  
 PC 1.40



17e

CDCl<sub>3</sub>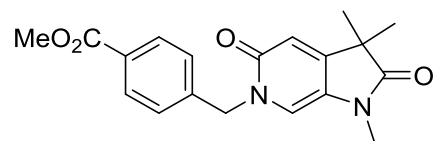

8.034  
8.017  
7.387  
7.370  
7.259  
6.625  
6.563  
5.188  
3.910  
3.053  
1.559  
1.378

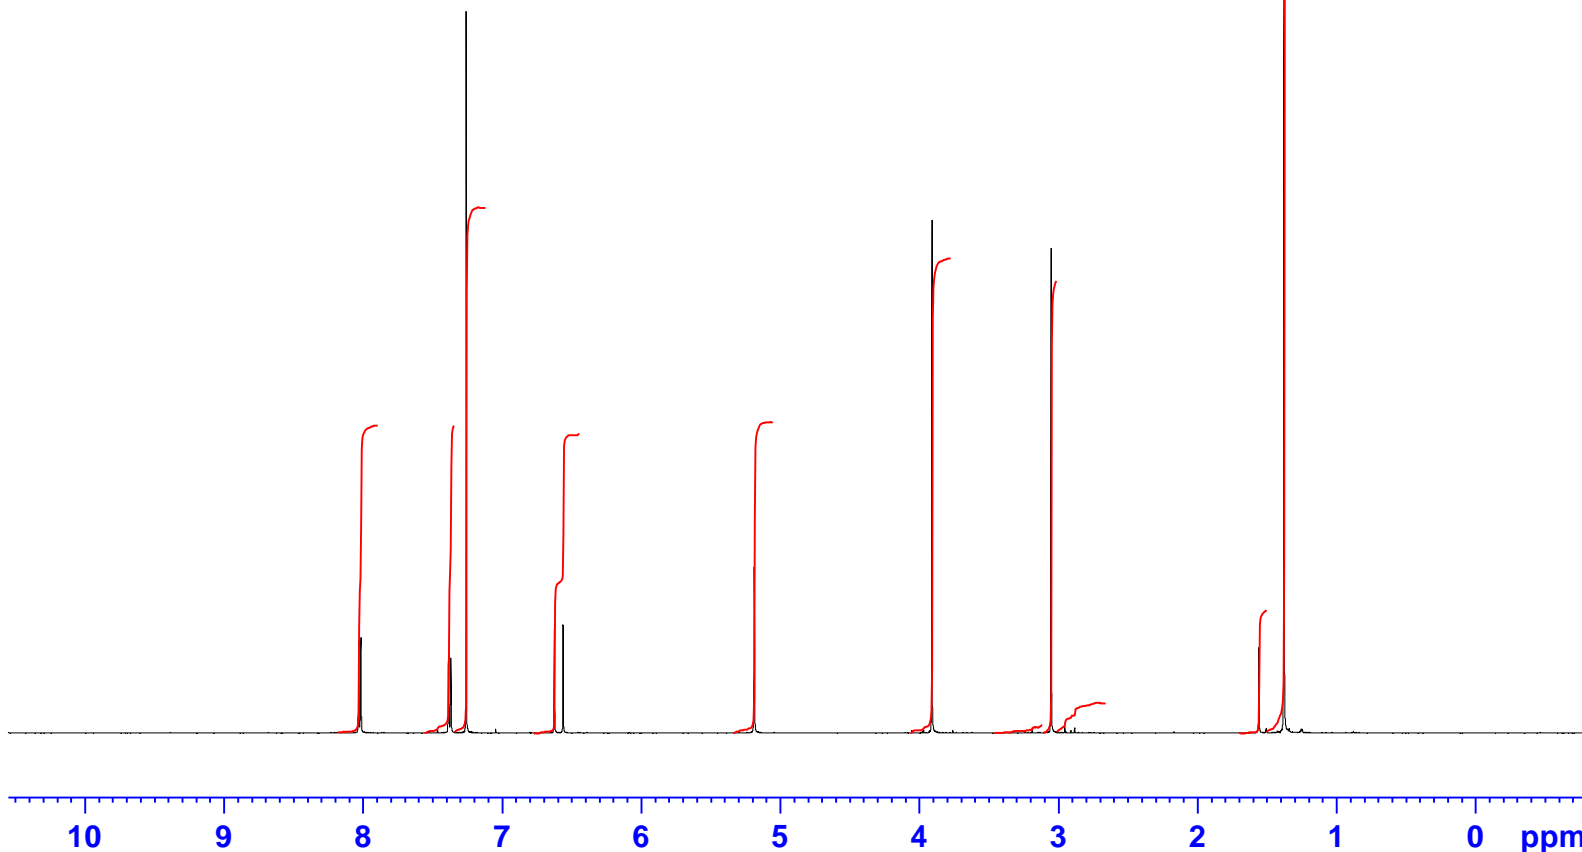

1.98  
1.98  
3.37  
1.92  
2.00  
3.05  
0.05  
2.91  
0.19  
0.82  
6.29

Current Data  
NAME DCM-494-117-A CDCl<sub>3</sub>  
EXPNO 10  
PROCNO 1

F2 - Acquisition  
Data parameters 20141204  
Time 9.31  
INSTRUM spect  
PROBHD 5 mm PABBO BB-  
PULPROG zg30  
TD 65536  
SOLVENT CDCl<sub>3</sub>  
NS 16  
DS 0  
SWH 10330.578 Hz  
FIDRES 0.157632 Hz  
AQ 3.1719425 sec  
RG 724  
DW 48.400 usec  
DE 11.99 usec  
TE 298.0 K  
D1 1.00000000 sec  
TDO 1

==== CHANNEL f1 =====  
SFO1 500.3030896 MHz  
NUC1 1H  
P1 16.25 usec  
PLW1 18.33600044 W

F2 - Processing parameters SI  
65536  
SF 500.3000125 MHz  
WDW EM  
SSB 0  
LB 0.30 Hz  
GB 0  
PC 1.00

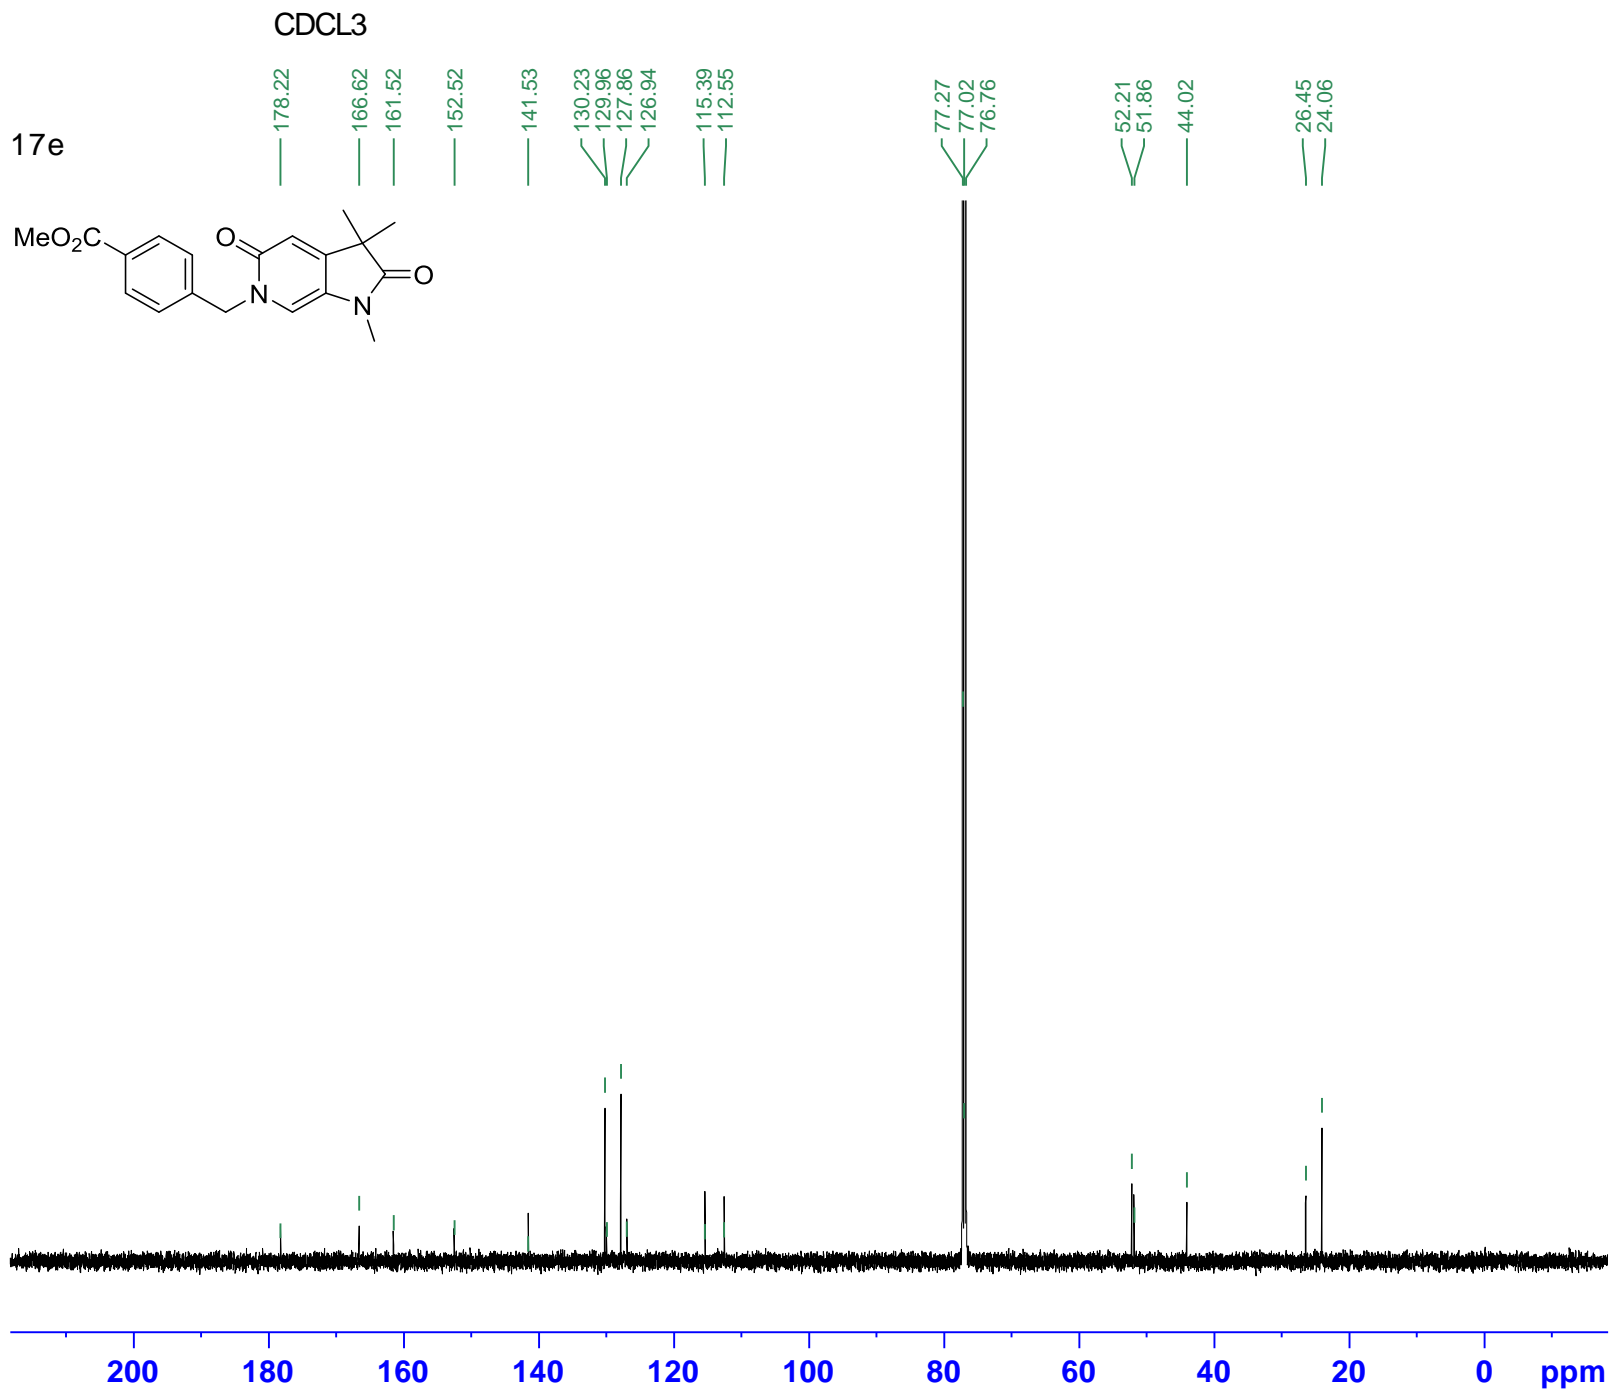

Current Data Parameters  
 NAME DCM-494-117-A CDCL<sub>3</sub>  
 EXPNO 11  
 PROCNO 1

F2 - Acquisition  
 Parameters Date\_ 20141204  
 Time 19.54  
 INSTRUM spect  
 PROBHD 5 mm PABBO BB-  
 PULPROG zgpg30  
 TD 65536  
 SOLVENT CDCl<sub>3</sub>  
 NS 2048  
 DS 2  
 S/MH 29761.904 Hz  
 FIDRES 0.454131 Hz  
 AQ 1.1010048 sec  
 RG 456  
 DW 16.800 usec  
 DE 7.68 usec  
 TE 298.0 K  
 D1 2.0000000 sec  
 D11 0.03000000 sec  
 TD0 1

===== CHANNEL f1 =====

SFO1 125.8131151 MHz  
 NUC1 13C  
 P1 9.75 usec  
 PLW1 82.38999939 W

===== CHANNEL f2 =====

SFO2 500.3020012 MHz  
 NUC2 1H  
 CPDPRG[2] waltz16  
 PCPD2 80.00 usec  
 PLW2 18.33600044 W  
 PLW12 0.75654000 W  
 PLW13 0.48418999 W

F2 - Processing  
 Parameters 65536  
 SF 125.8005350 MHz  
 WDW EM  
 SSB 0  
 LB 1.00 Hz  
 GB 0  
 PC 1.40



17f

DMSO

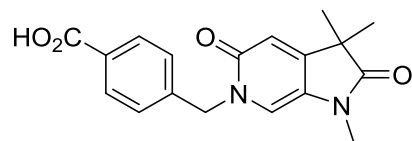

7.953  
7.936  
7.565  
7.463  
7.446  
6.641  
— 5.156  
3.354  
3.055  
2.547  
2.543  
2.540  
2.536  
2.532  
1.309

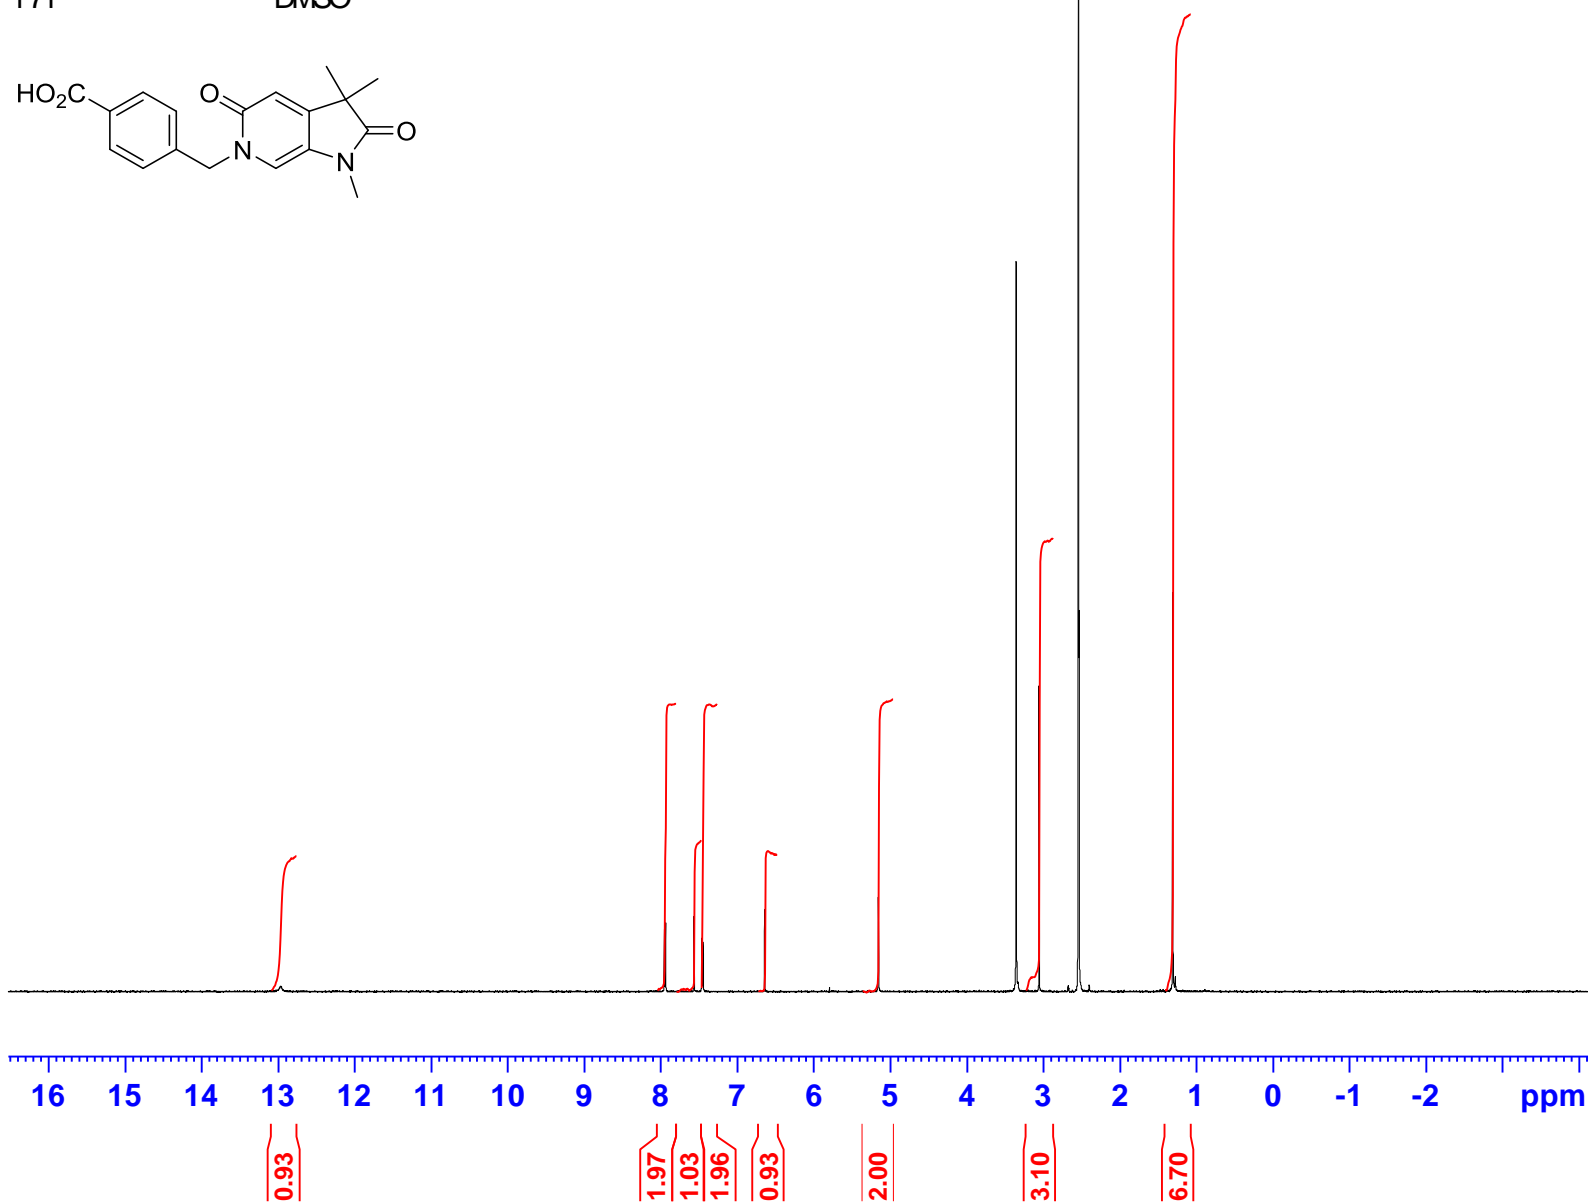

Current Data  
NAME DCM-494-119-A DMSO  
EXPNO 10  
PROCNO 1

F2 - Acquisition  
Date\_ 20141208  
Time 16.06  
INSTRUM spect  
PROBHD 5 mm PABBO BB-  
PULPROG zg30  
TD 65536  
SOLVENT DMSO  
NS 16  
DS 0  
SWH 10330.578 Hz  
FIDRES 0.157632 Hz  
AQ 3.1719425 sec  
RG 812  
DW 48.400 usec  
DE 11.99 usec  
TE 298.0 K  
D1 1.00000000 sec  
TDO 1

==== CHANNEL f1 =====  
SFO1 500.3030896 MHz  
NUC1 1H  
P1 16.25 usec  
PLW1 18.33600044 W

F2 - Processing parameters SI  
65536  
SF 500.2999843 MHz  
WDW EM  
SSB 0  
LB 0.30 Hz  
GB 0  
PC 1.00

17f

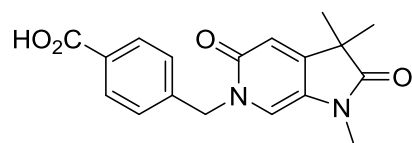

DMSO

177.92

167.55

160.94

152.70

142.91

129.99

128.16

126.23

115.86

114.55

 51.71  
 43.88  
 40.60  
 40.51  
 40.43  
 40.34  
 40.27  
 40.18  
 40.01  
 39.84  
 39.68  
 39.51  
 26.77  
 24.04
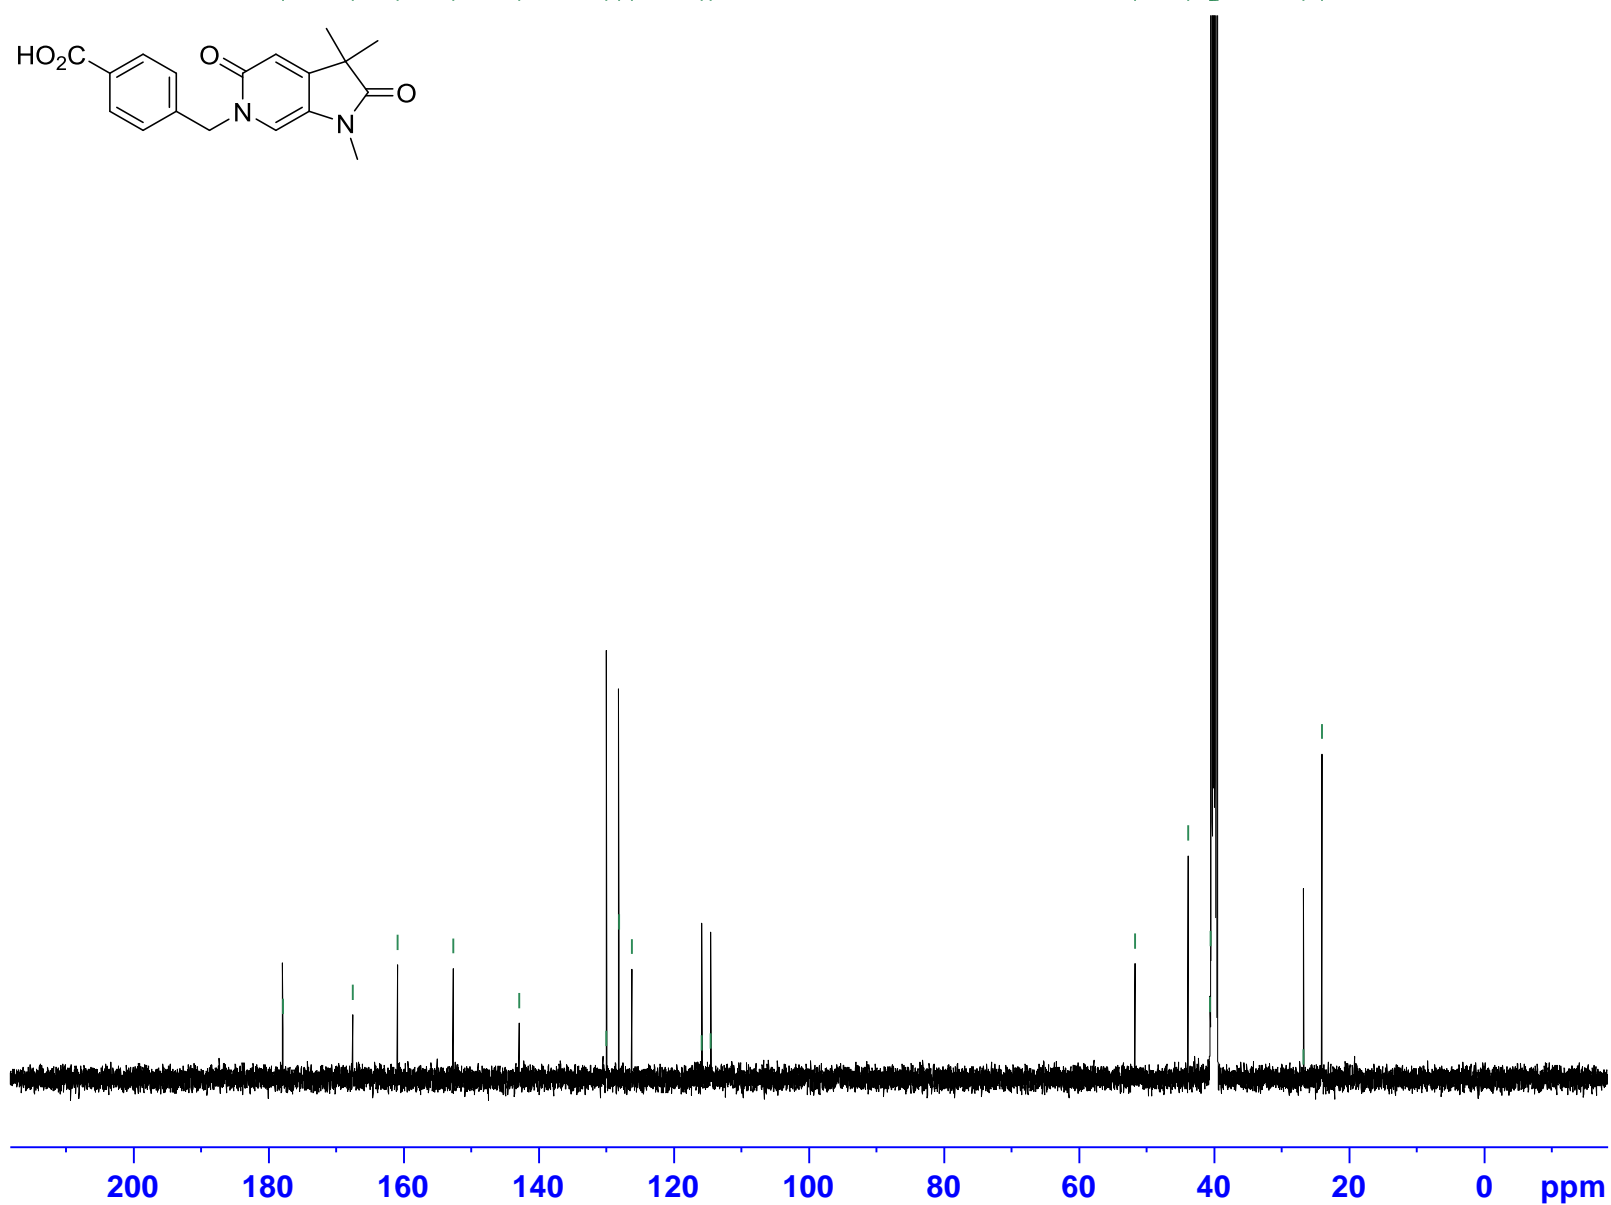

Current Data Parameters  
 NAME DCM-494-119-A DMSO  
 EXPNO 11  
 PROCNO 1

F2 - Acquisition  
 Parameters Date\_ 20141209  
 Time 5.59  
 INSTRUM spect  
 PROBHD 5 mm PABBO BB-  
 PULPROG zgpg30  
 TD 65536  
 SOLVENT DMSO  
 NS 2048  
 DS 2  
 S/MH 29761.904 Hz  
 FIDRES 0.454131 Hz  
 AQ 1.1010048 sec  
 RG 456  
 DW 16.800 usec  
 DE 7.68 usec  
 TE 298.0 K  
 D1 2.0000000 sec  
 D11 0.03000000 sec  
 TD0 1

===== CHANNEL f1 =====

SFO1 125.8131151 MHz  
 NUC1 13C  
 P1 9.75 usec  
 PLW1 82.38999939 W

===== CHANNEL f2 =====

SFO2 500.3020012 MHz  
 NUC2 1H  
 CPDPRG[2] waltz16  
 PCPD2 80.00 usec  
 PLW2 18.33600044 W  
 PLW12 0.75654000 W  
 PLW13 0.48418999 W

F2 - Processing  
 Parameters 65536  
 SF 125.8005350 MHz  
 WDW EM  
 SSB 0  
 LB 1.00 Hz  
 GB 0  
 PC 1.40

17g

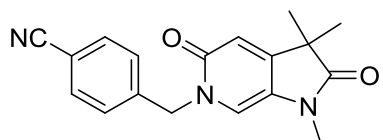

"DCM-494-123-A CDCL3" 10 1 z:\data\DCM\nmr

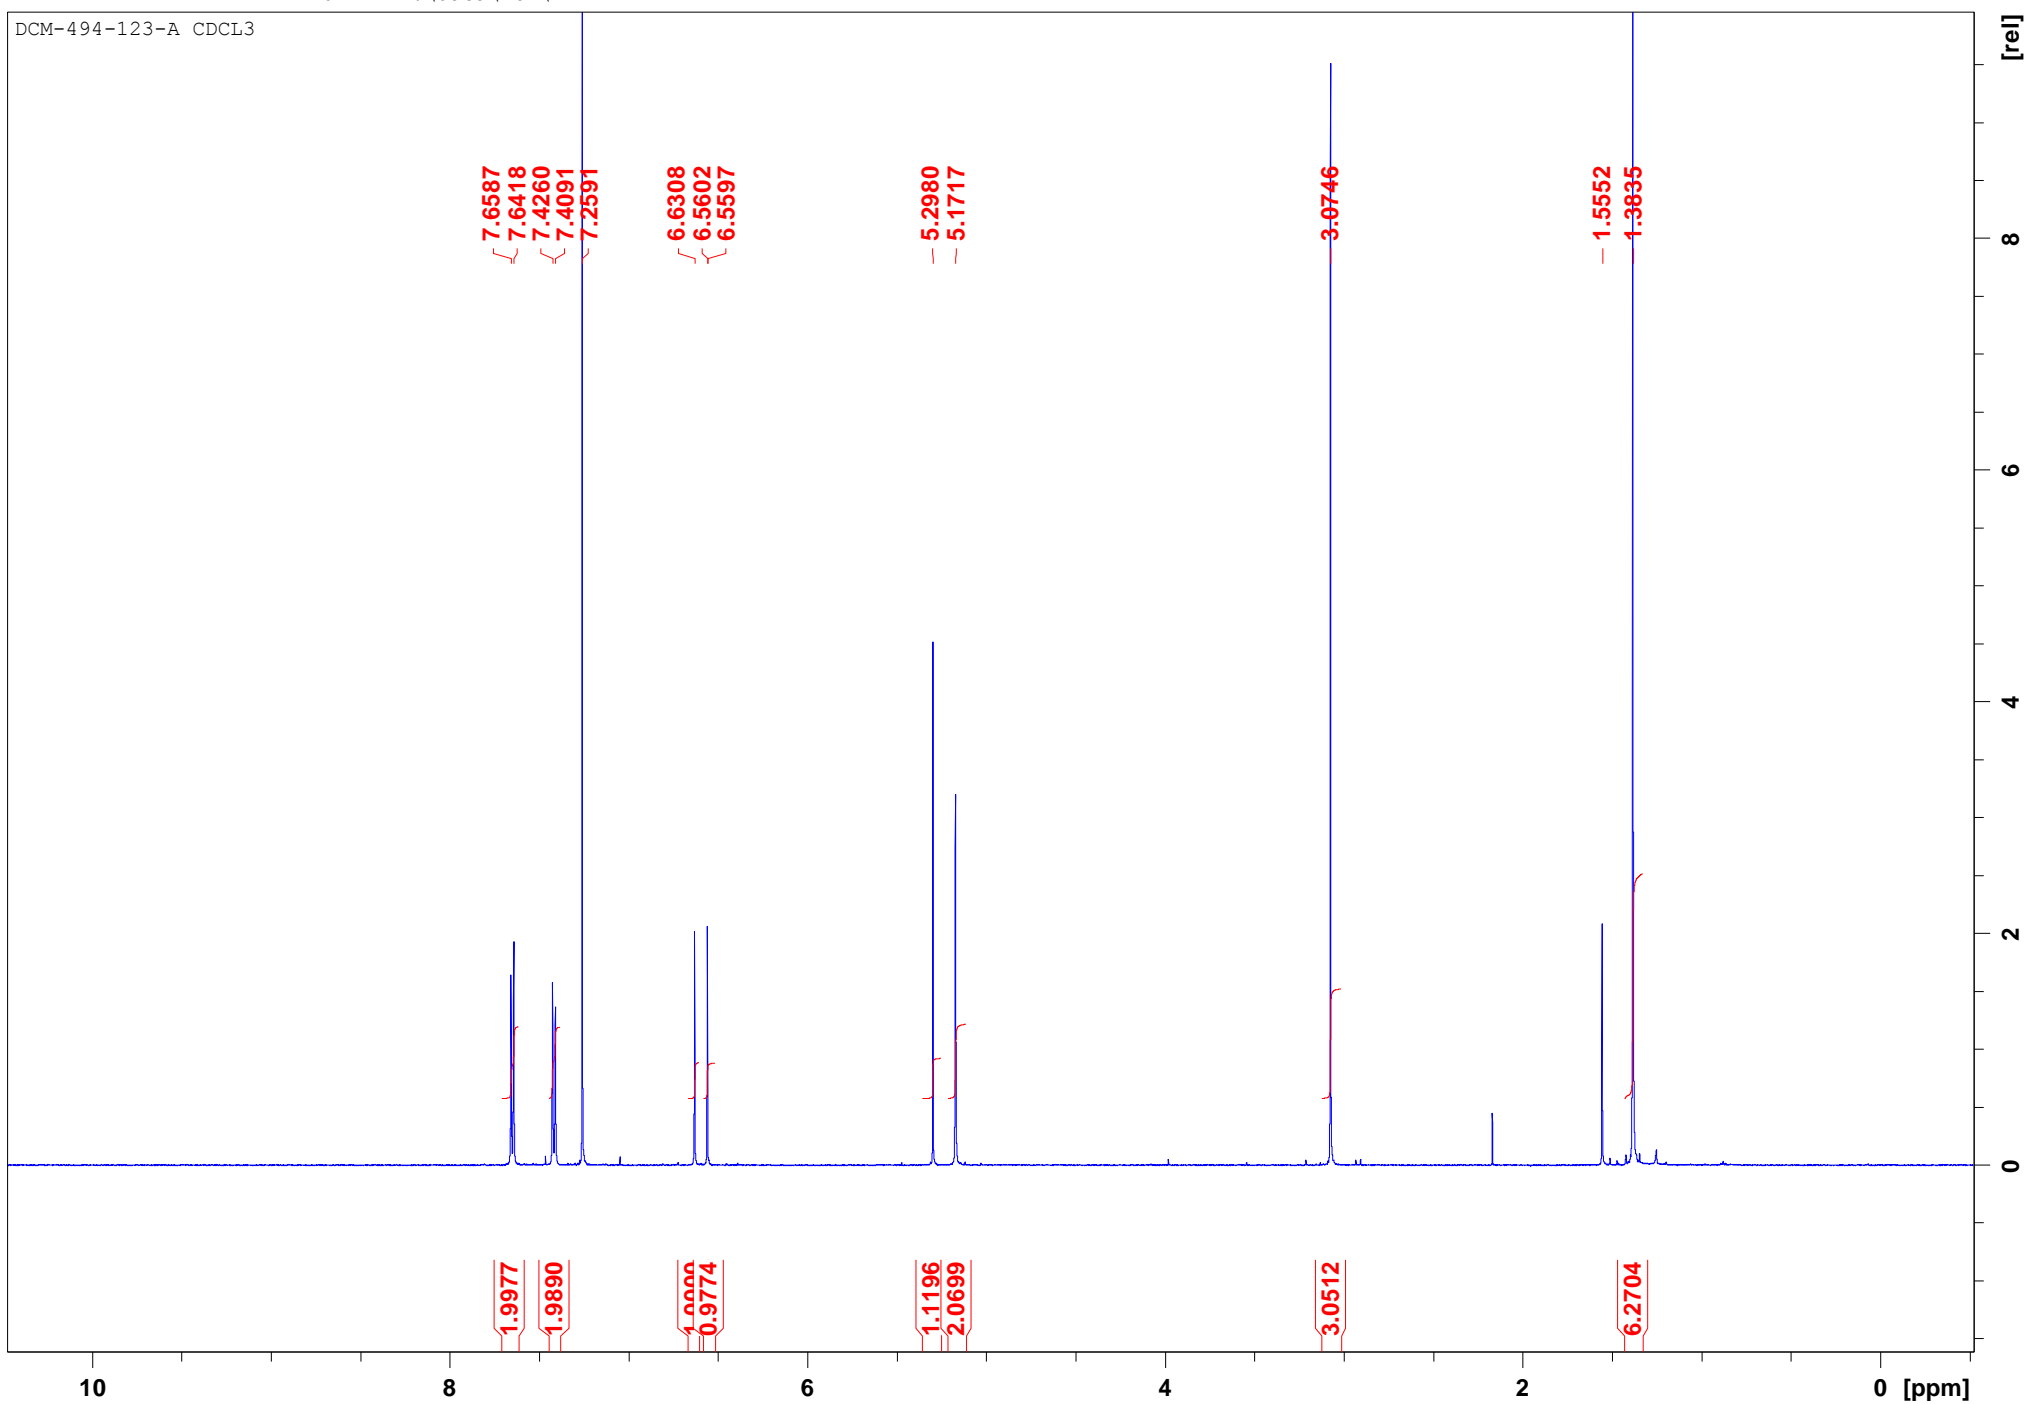

17g



"DCM-494-123-A CDCL3" 11 1 z:\data\DCM\nmr

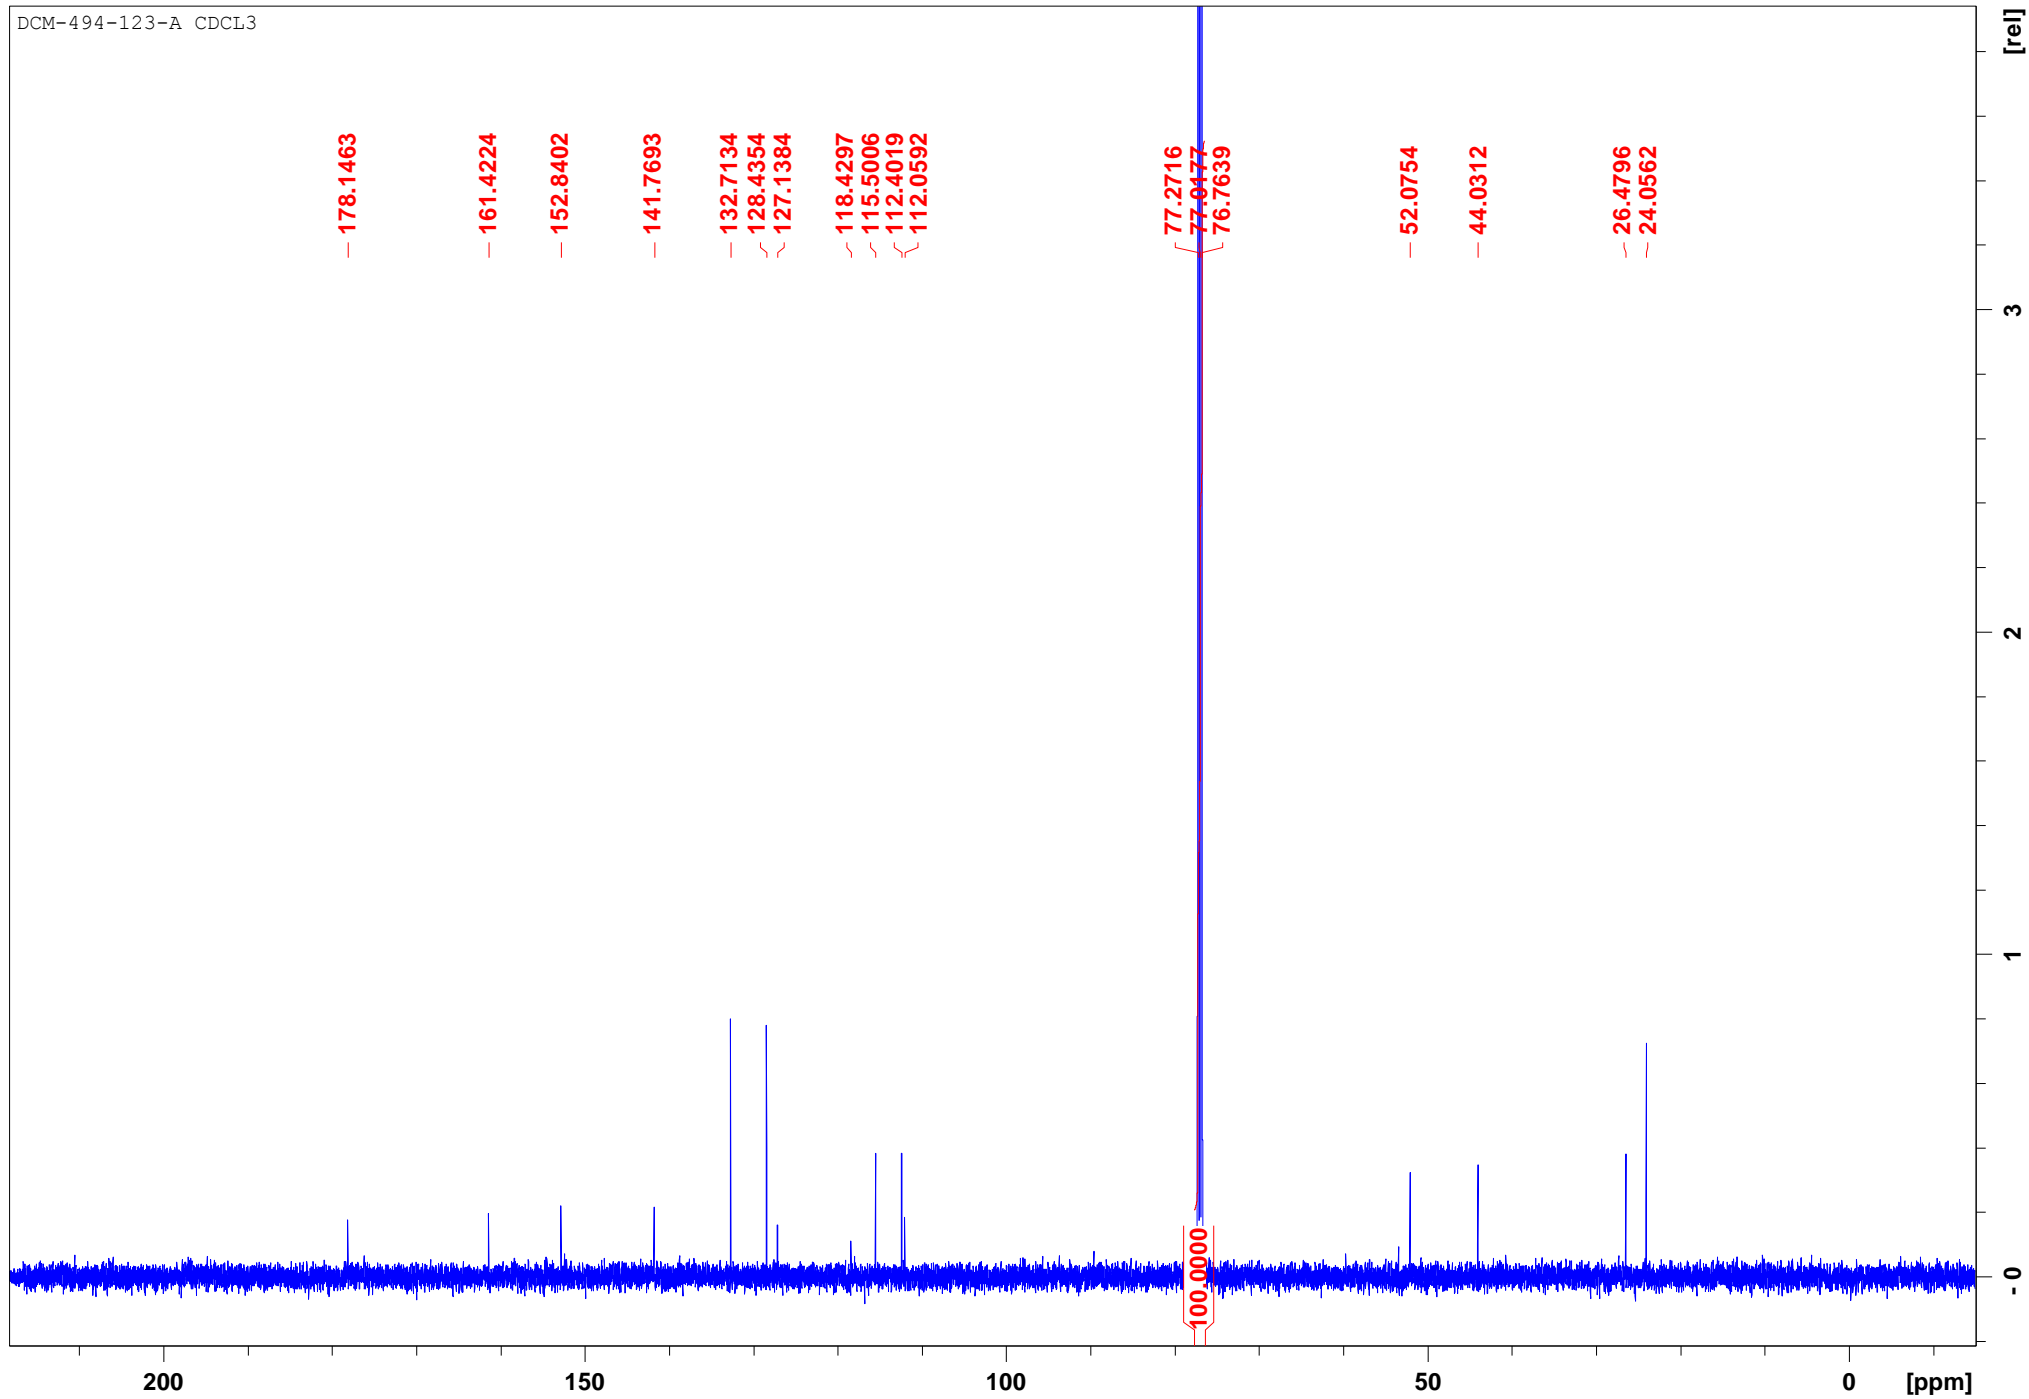

17h

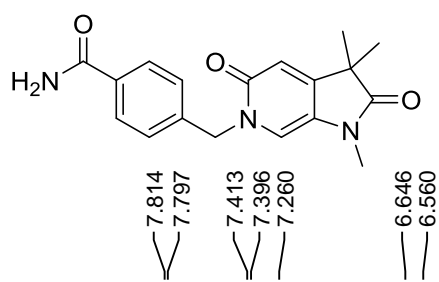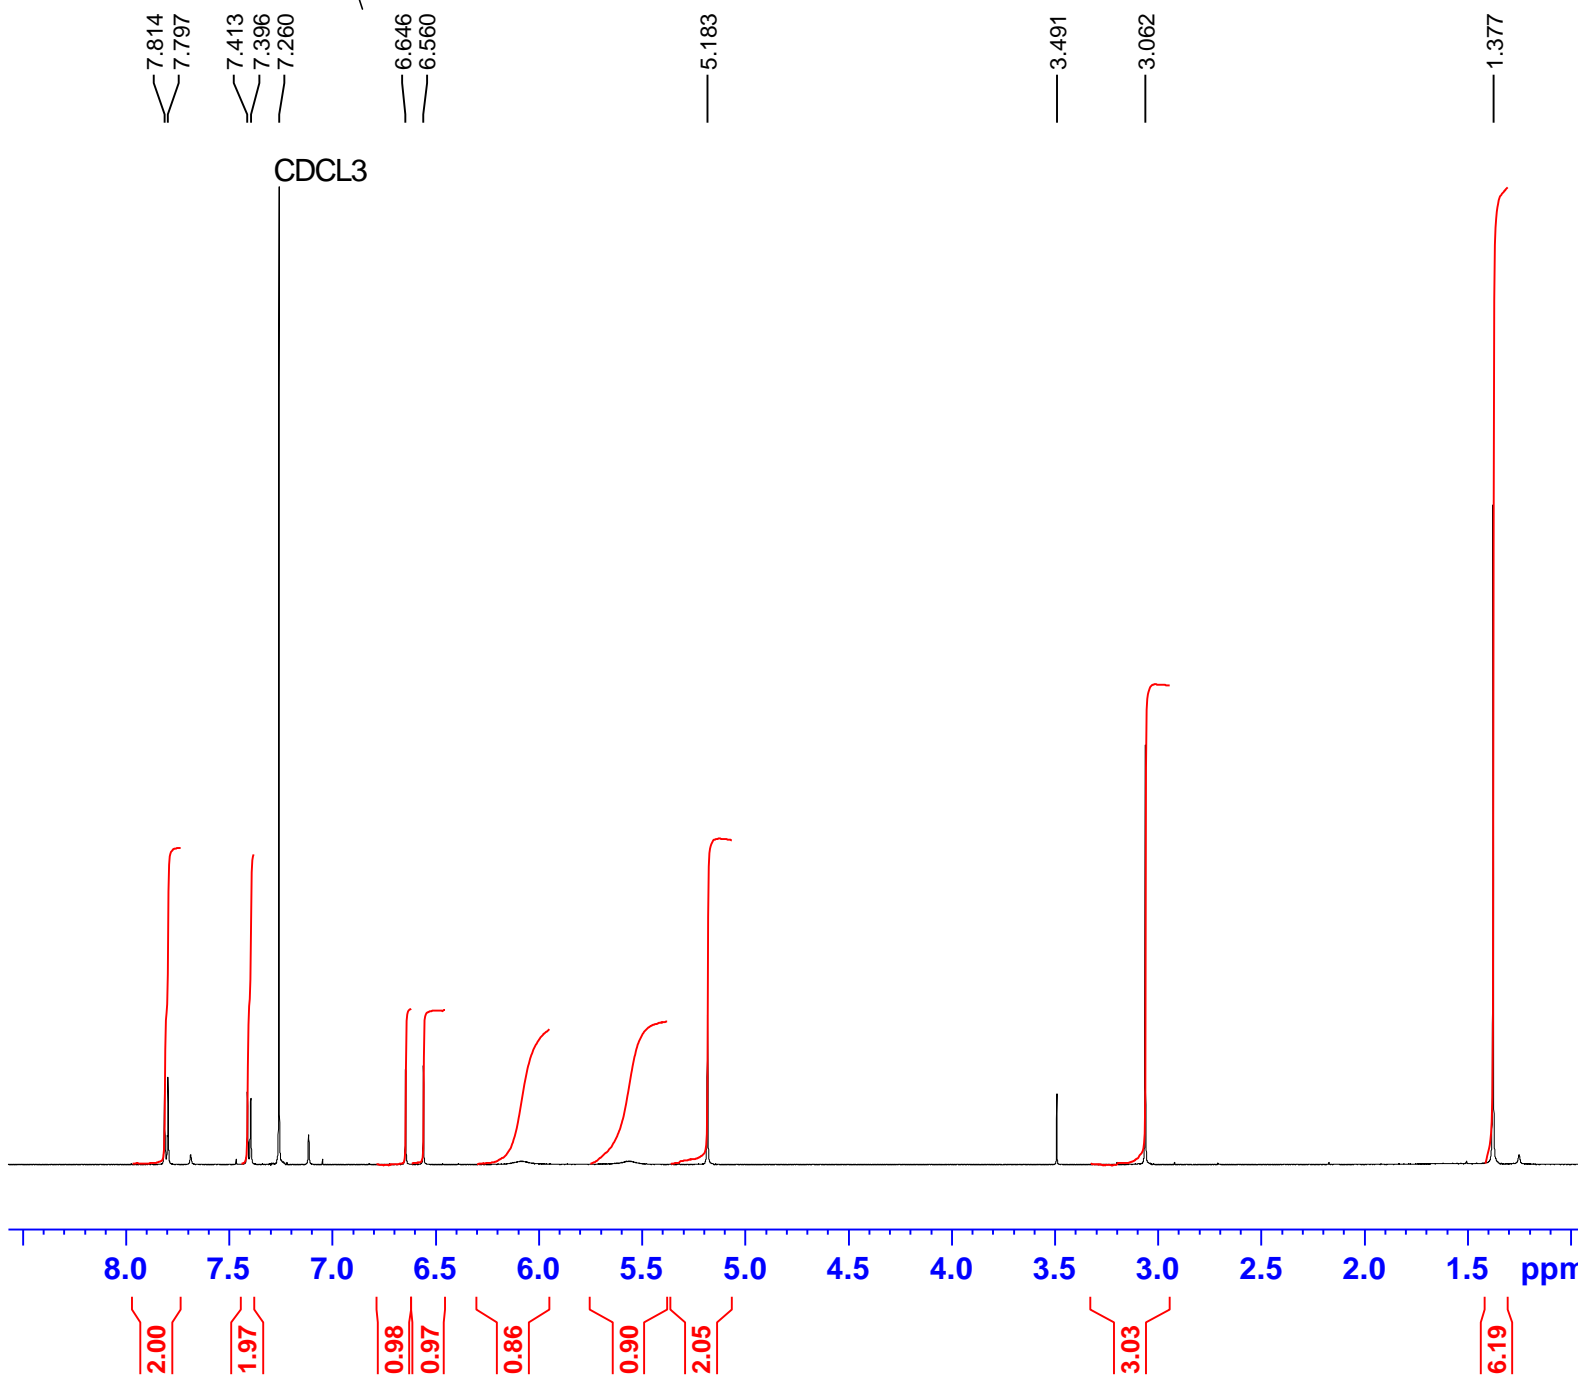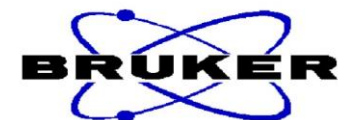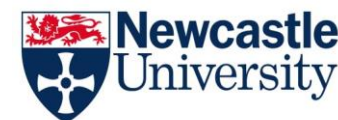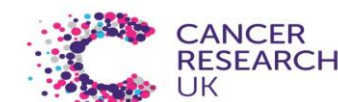

Current Data  
 NAME DCM-494-147-B CDCL3  
 EXPNO 10  
 PROCNO 1

F2 - Acquisition  
 Parameters 20150129  
 Time 14.56  
 INSTRUM spect  
 PROBHD 5 mm PABBO BB-  
 PULPROG zg30  
 TD 65536  
 SOLVENT CDCl3  
 NS 16  
 DS 0  
 SWH 10330.578 Hz  
 FIDRES 0.157632 Hz  
 AQ 3.1719425 sec  
 RG 724  
 DW 48.400 usec  
 DE 11.99 usec  
 TE 293.5 K  
 D1 1.00000000 sec  
 TD0 1

===== CHANNEL f1 =====  
 SFO1 500.3030896 MHz  
 NUC1 1H  
 P1 16.25 usec  
 PLW1 18.33600044 W

F2 - Processing parameters SI  
 65536  
 SF 500.3000124 MHz  
 WDW EM  
 SSB 0  
 LB 0.30 Hz  
 GB 0  
 PC 1.00

17h

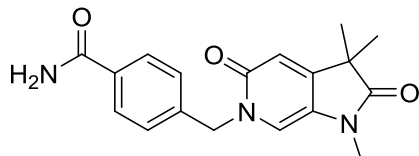

DCM-494-147-B CDCL3

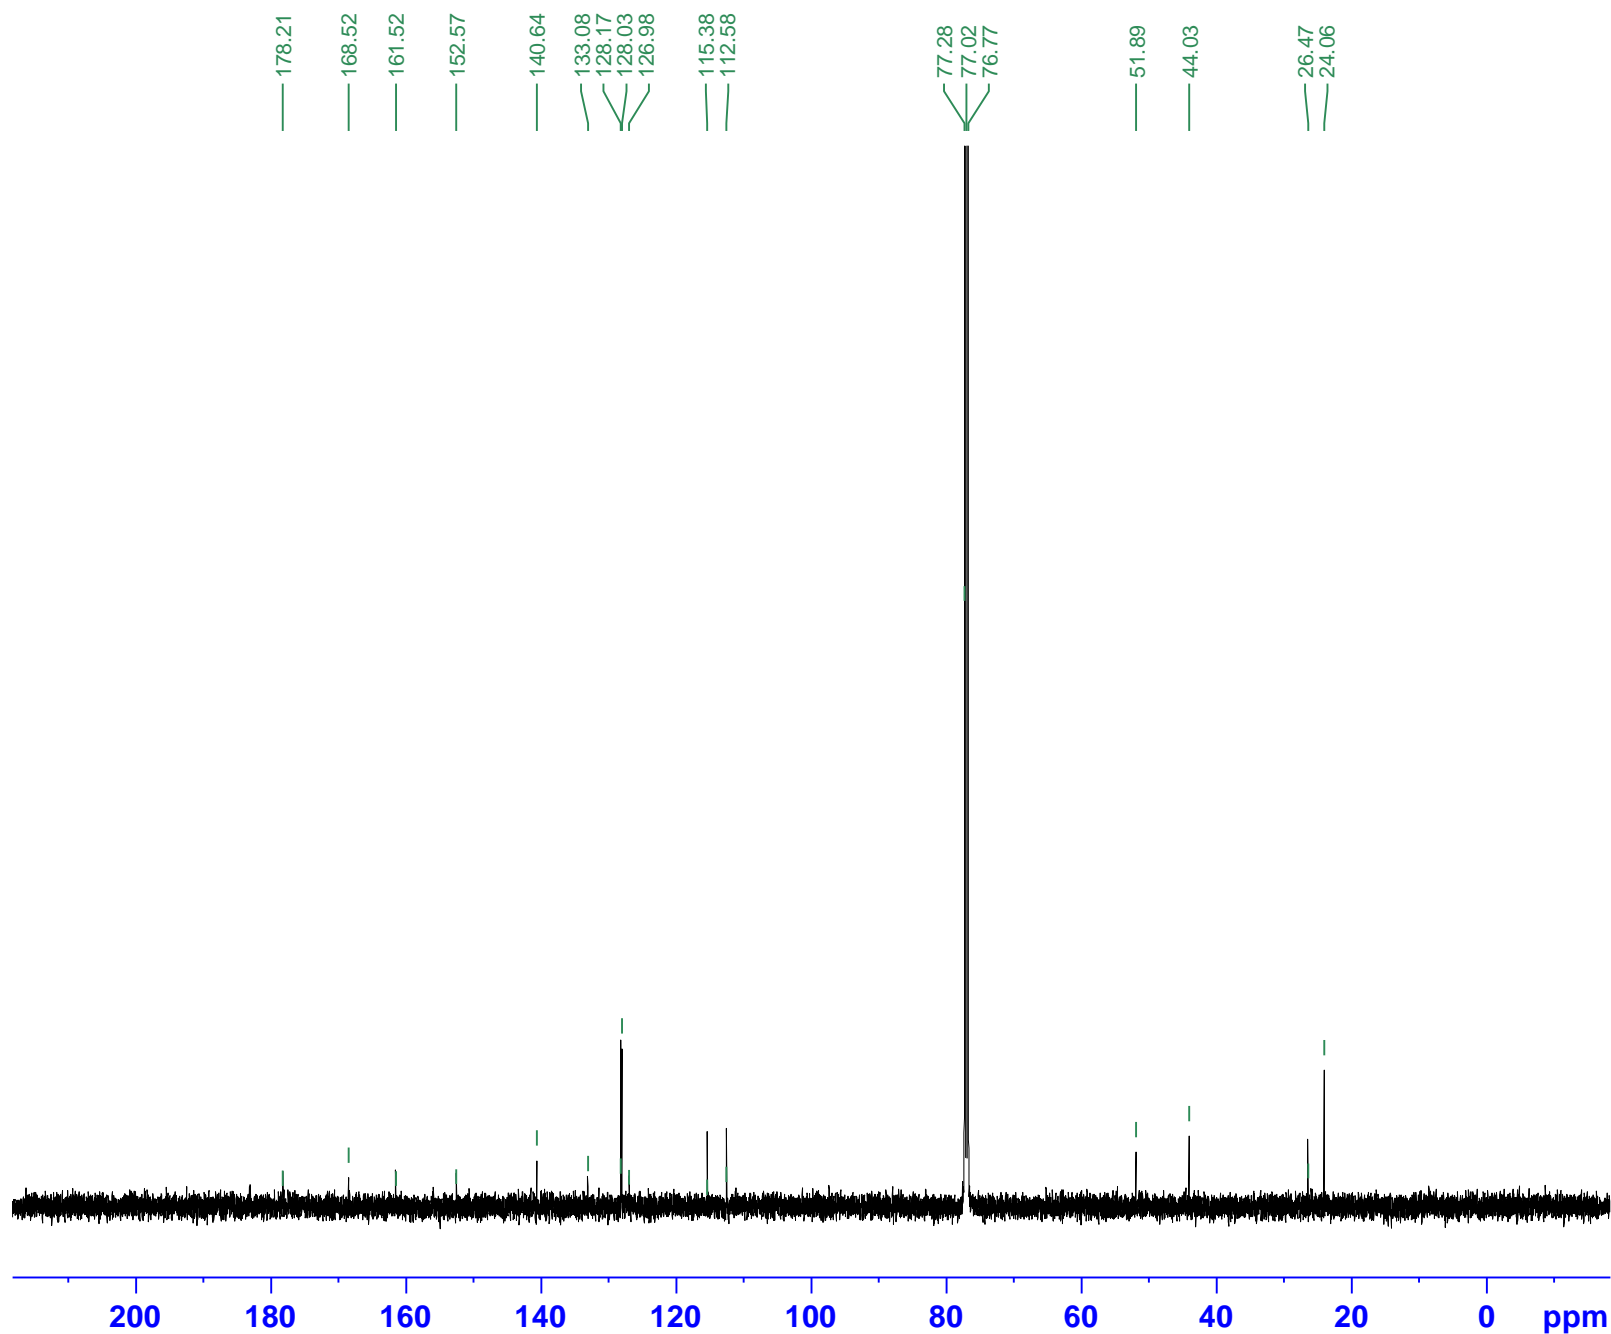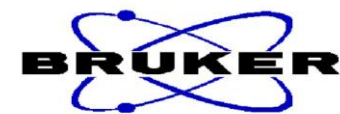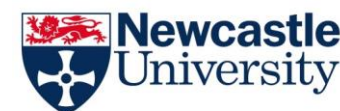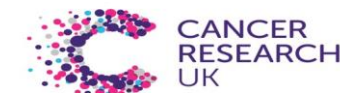

Current Data Parameters  
 NAME DCM-494-147-B CDCL3  
 EXPNO 11  
 PROCNO 1

F2 - Acquisition  
 Parameters Date\_ 20150129  
 Time 20.33  
 INSTRUM spect  
 PROBHD 5 mm PABBO BB-  
 PULPROG zgpg30  
 TD 65536  
 SOLVENT CDCl3  
 NS 2048  
 DS 2  
 SWH 29761.904 Hz  
 FIDRES 0.454131 Hz  
 AQ 1.1010048 sec  
 RG 812  
 DW 16.800 usec  
 DE 7.68 usec  
 TE 296.2 K  
 D1 2.0000000 sec  
 D11 0.03000000 sec  
 TD0 1

===== CHANNEL f1 =====  
 SFO1 125.8131151 MHz  
 NUC1 13C  
 P1 9.75 usec  
 PLW1 82.38999939 W

===== CHANNEL f2 =====  
 SFO2 500.3020012 MHz  
 NUC2 1H  
 CPDPRG2 waltz16  
 PCPD2 80.00 usec  
 PLW2 18.33600044 W  
 PLW12 0.75654000 W  
 PLW13 0.48418999 W

F2 - Processing  
 Parameters 65536  
 SF 125.8005350 MHz  
 WDW EM  
 SSB 0  
 LB 1.00 Hz  
 GB 0  
 PC 1.40

17i

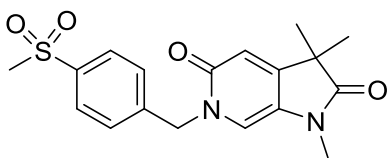

SA-500-34

7.842  
7.825  
7.486  
7.469  
7.374  
6.526  
5.191  
4.807  
3.215  
3.212  
3.209  
3.205  
3.202  
3.032  
2.996  
1.273

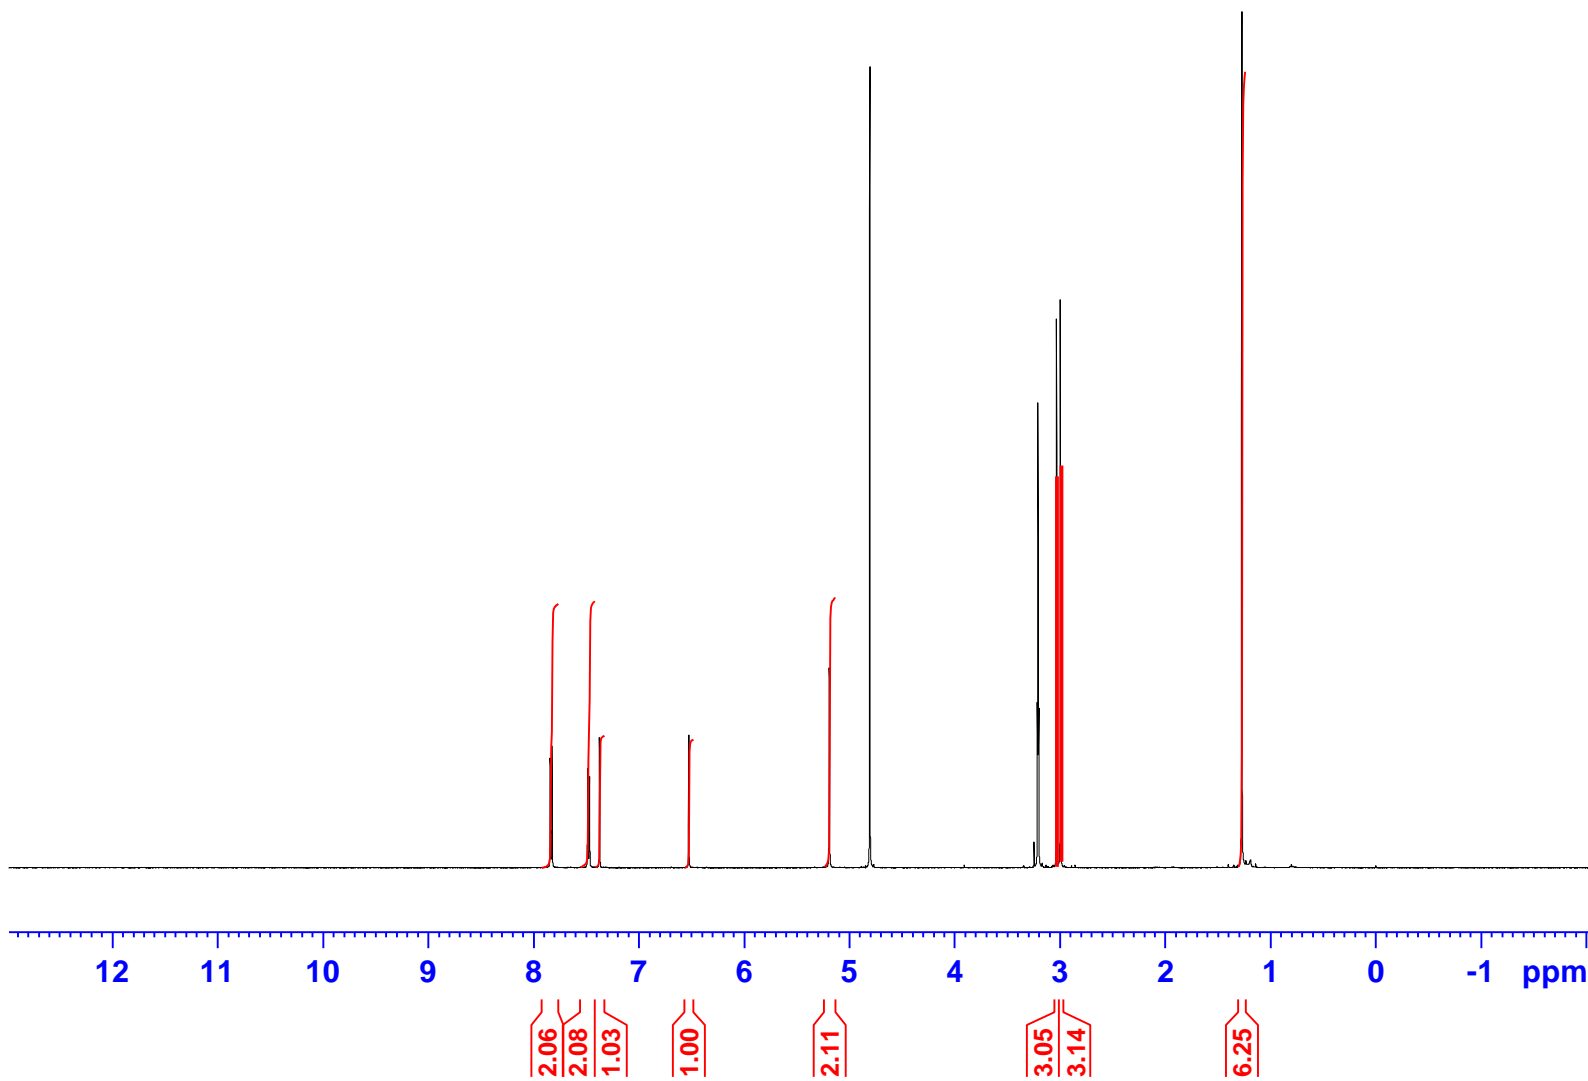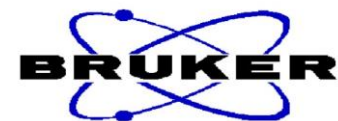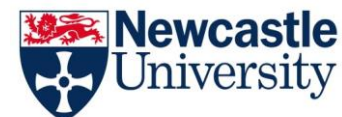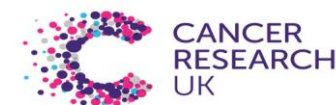

Current Data  
NAME SA-500-34  
EXPNO 10  
PROCNO 1

F2 - Acquisition  
Date\_ 20150122  
Time 15.07  
INSTRUM spect  
PROBHD 5 mm PABBO BB-  
PULPROG zg30  
TD 65536  
SOLVENT MeOD  
NS 16  
DS 0  
SWH 10330.578 Hz  
FIDRES 0.157632 Hz  
AQ 3.1719425 sec  
RG 456  
DW 48.400 usec  
DE 11.99 usec  
TE 292.3 K  
D1 1.0000000 sec  
TDO 1

==== CHANNEL f1 =====  
SFO1 500.3030896 MHz  
NUC1 1H  
P1 16.25 usec  
PLW1 18.33600044 W

F2 - Processing parameters SI  
65536  
SF 500.300603 MHz  
WDW EM  
SSB 0  
LB 0.30 Hz  
GB 0  
PC 1.00

17i

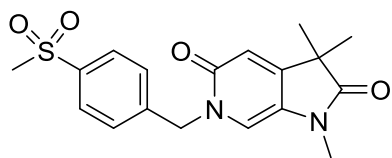

SA-500-34

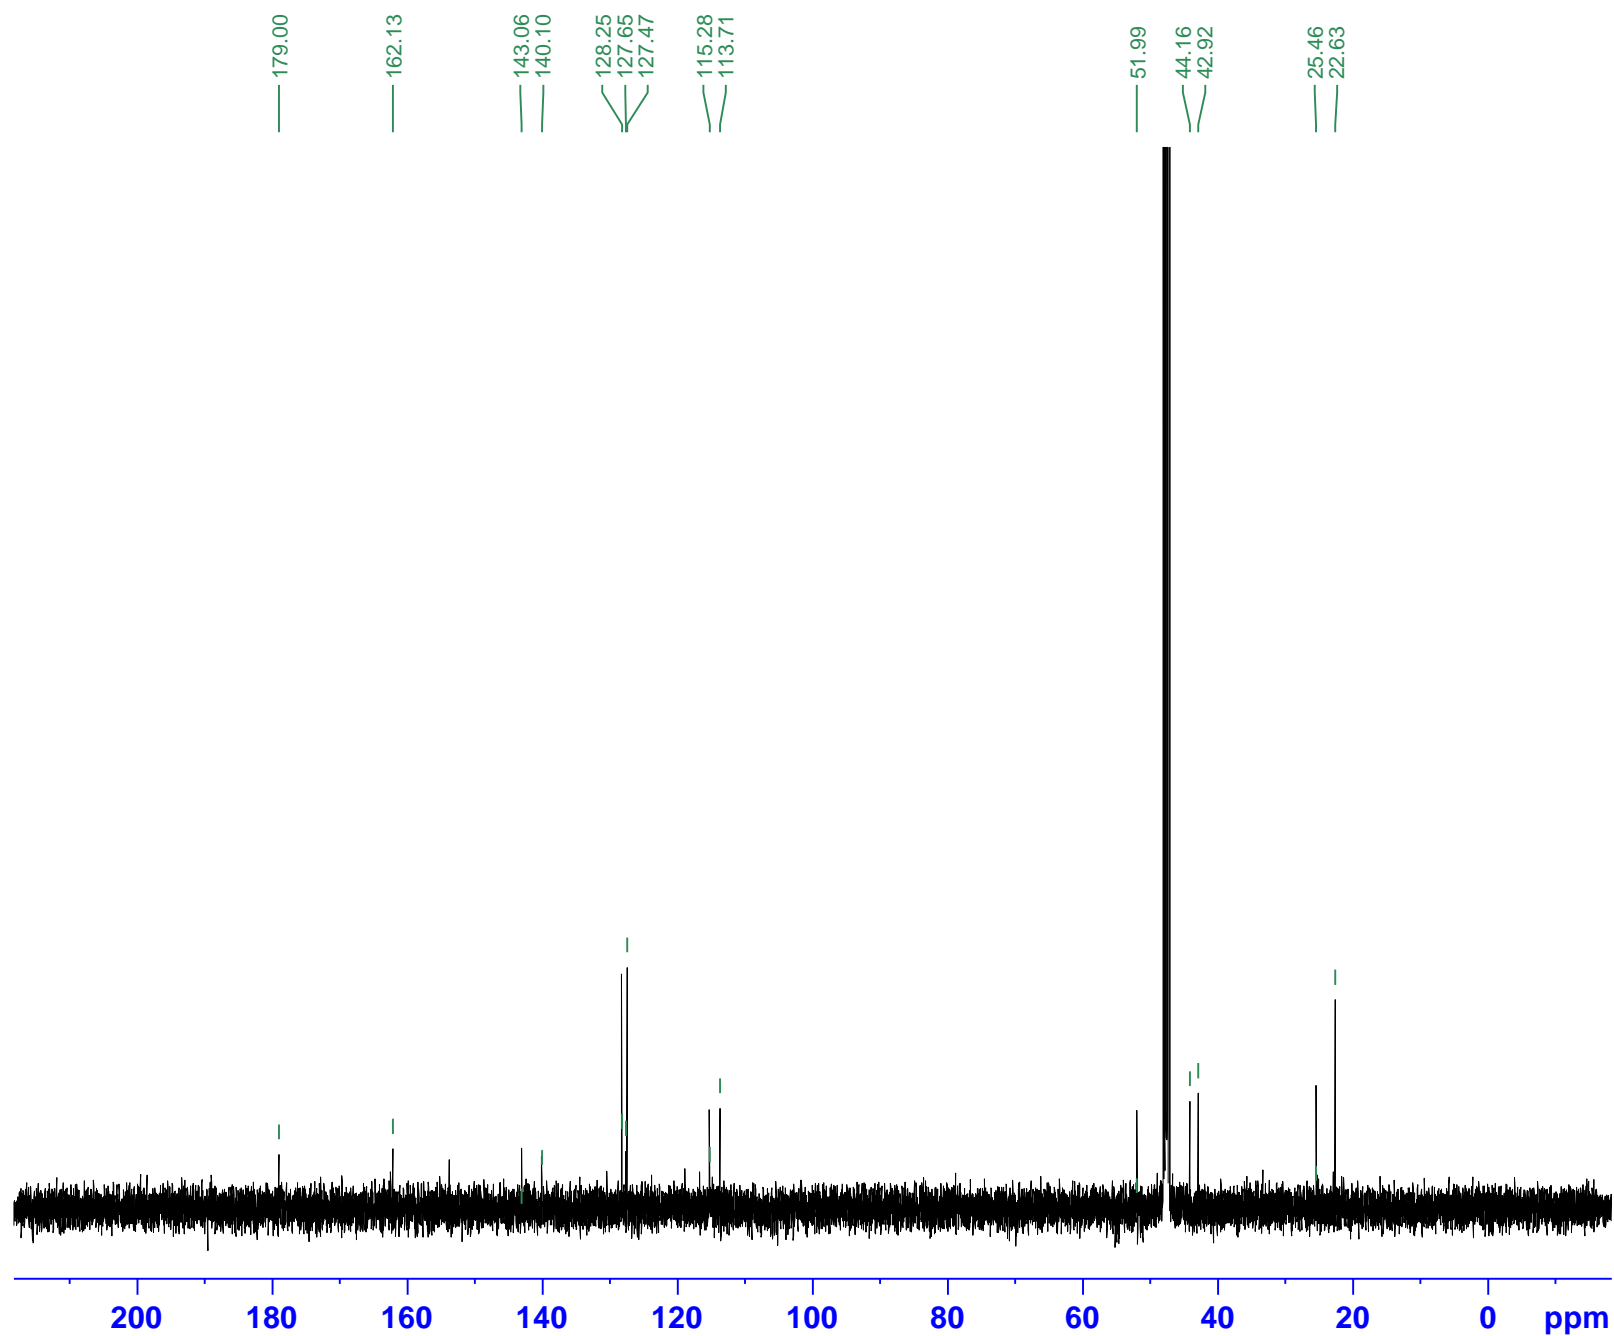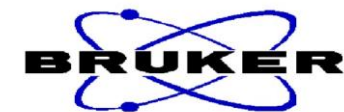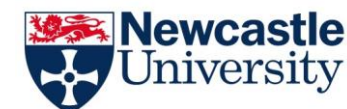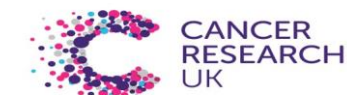

Current Data Parameters  
NAME SA-500-34  
EXPNO 11  
PROCNO 1

F2 - Acquisition  
Parameters Date\_ 20150122  
Time 16.15  
INSTRUM spect  
PROBHD 5 mm PABBO BB-  
PULPROG zgpg30  
TD 65536  
SOLVENT MeOD  
NS 256  
DS 2  
SMH 29761.904 Hz  
FIDRES 0.454131 Hz  
AQ 1.1010048 sec  
RG 812  
DV 16.800 usec  
DE 7.68 usec  
TE 295.3 K  
D1 2.00000000 sec  
D11 0.03000000 sec  
TD0 1

===== CHANNEL f1 =====  
SFO1 125.8131151 MHz  
NUC1 13C  
P1 9.75 usec  
PLW1 82.38999939 W

===== CHANNEL f2 =====  
SFO2 500.3020012 MHz  
NUC2 1H  
CPDPRG2 waltz16  
PCPD2 80.00 usec  
PLW2 18.33600044 W  
PLW12 0.75654000 W  
PLW13 0.48418999 W

F2 - Processing  
Parameters 65536  
SF 125.8005350 MHz  
WDW EM  
SSB 0  
LB 1.00 Hz  
GB 0  
PC 1.40



17j

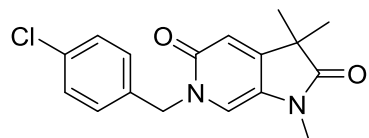

SA-500-42 11 1 z:\data\SA\nmr

SA-500-42

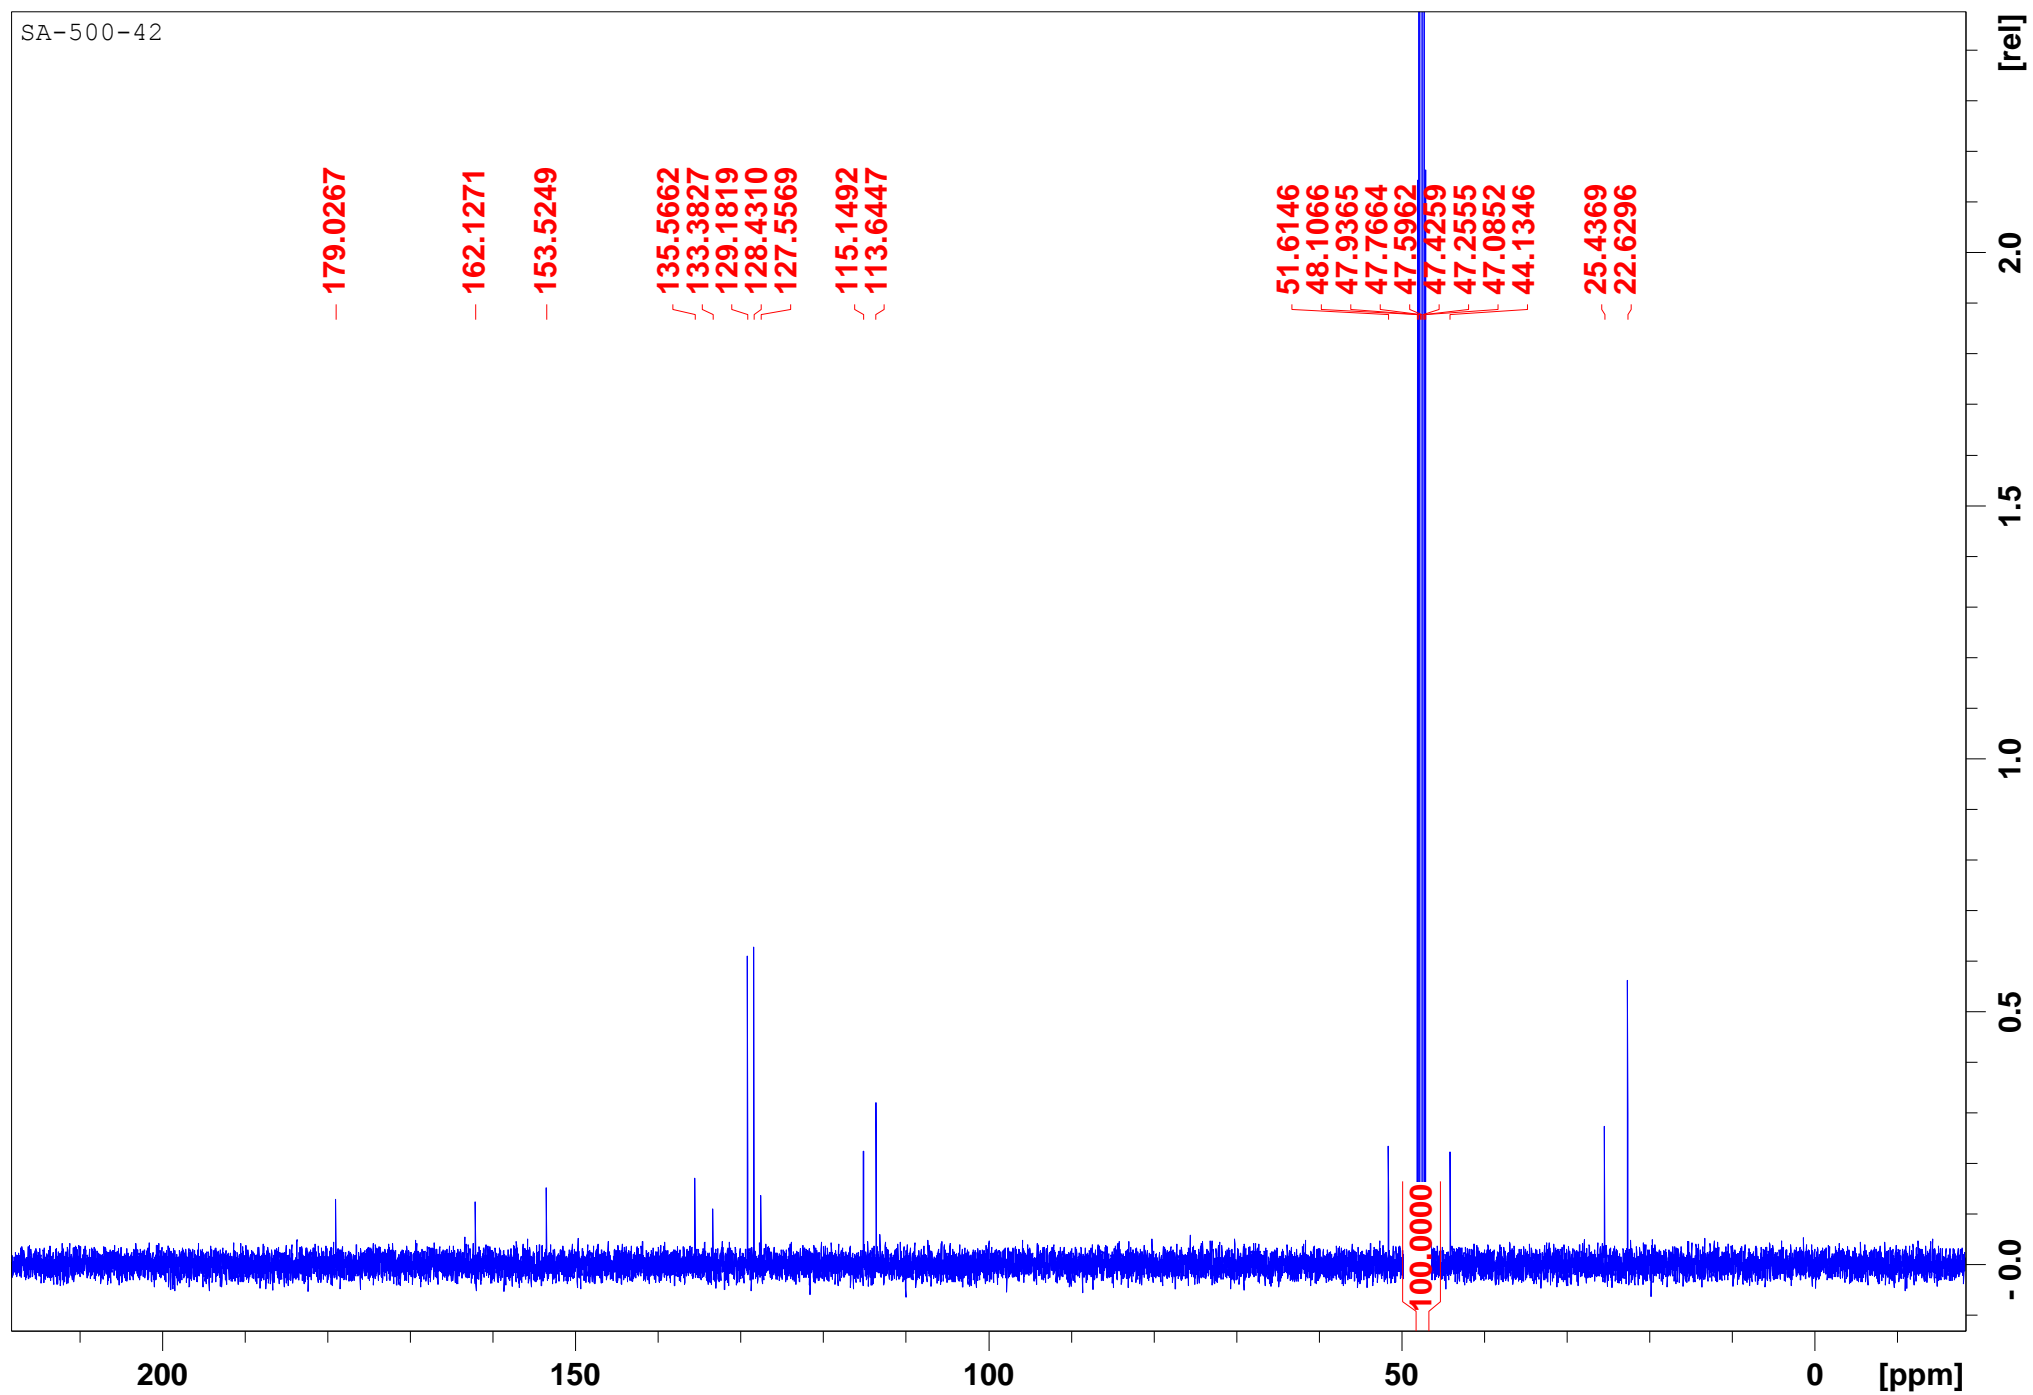

17k

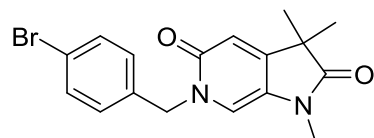

7.503  
7.486  
7.415  
7.286  
7.269  
6.607

5.148  
4.902

3.313  
3.310  
3.307  
3.119

1.361

SA-500-64

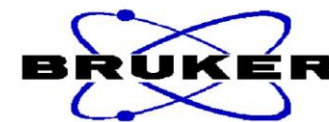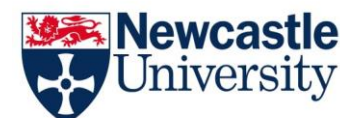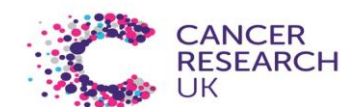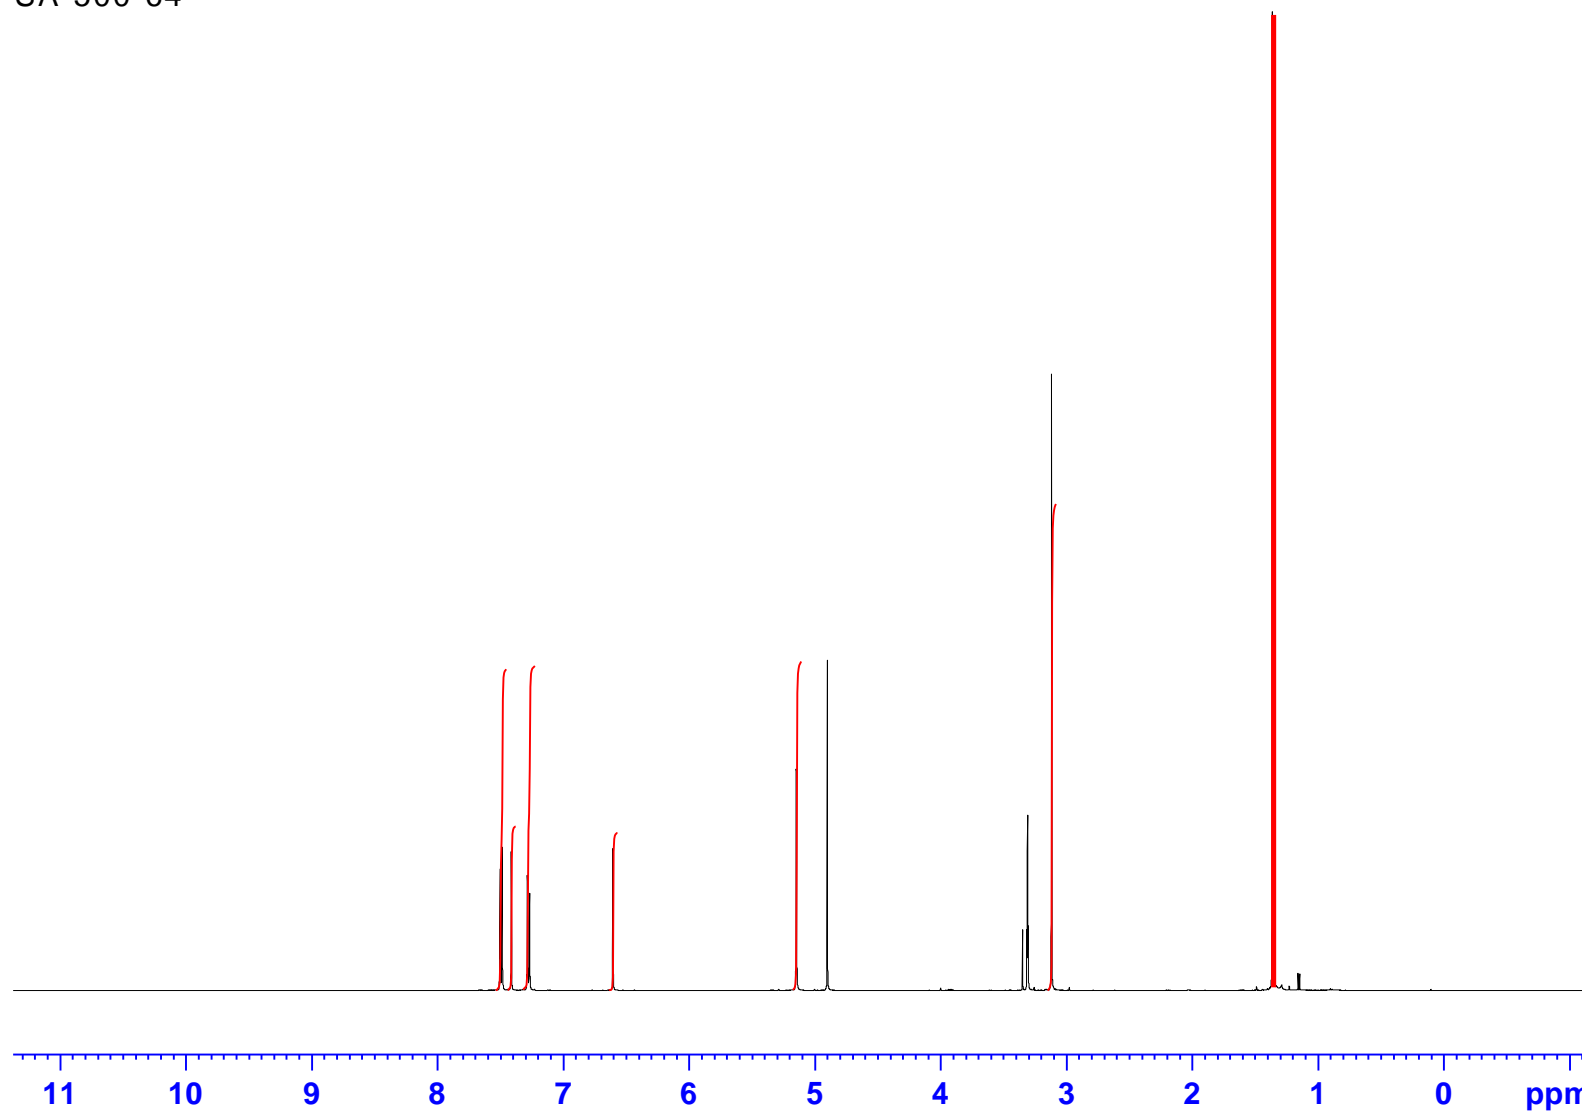

2.03  
1.04  
2.06  
1.00

2.08

3.09

6.20

Current Data  
NAME SA-500-64  
EXPNO 10  
PROCNO 1  
F2 - Acquisition  
Date\_ Time 20150213 13.49  
INSTRUM spect  
PROBHD 5 mmPABBO BB-  
PULPROG zg30  
TD 65536  
SOLVENT MeOD  
NS 16  
DS 0  
SWH 10330.578 Hz  
FIDRES 0.157632 Hz  
AQ 3.1719425 sec  
RG 406  
DW 48.400 usec  
DE 11.99 usec  
TE 292.9 K  
D1 1.00000000 sec  
TD0 1

==== CHANNEL f1 =====  
SFO1 500.3030896 MHz  
NUC1 1H  
P1 16.25 usec  
PLW1 18.33600044 W

F2 - Processing parameters SI  
SF 500.3000098 MHz  
WDW EM  
SSB 0  
LB 0.30 Hz  
GB 0  
PC 1.00

17k

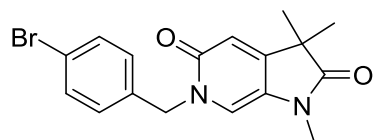

SA-500-64

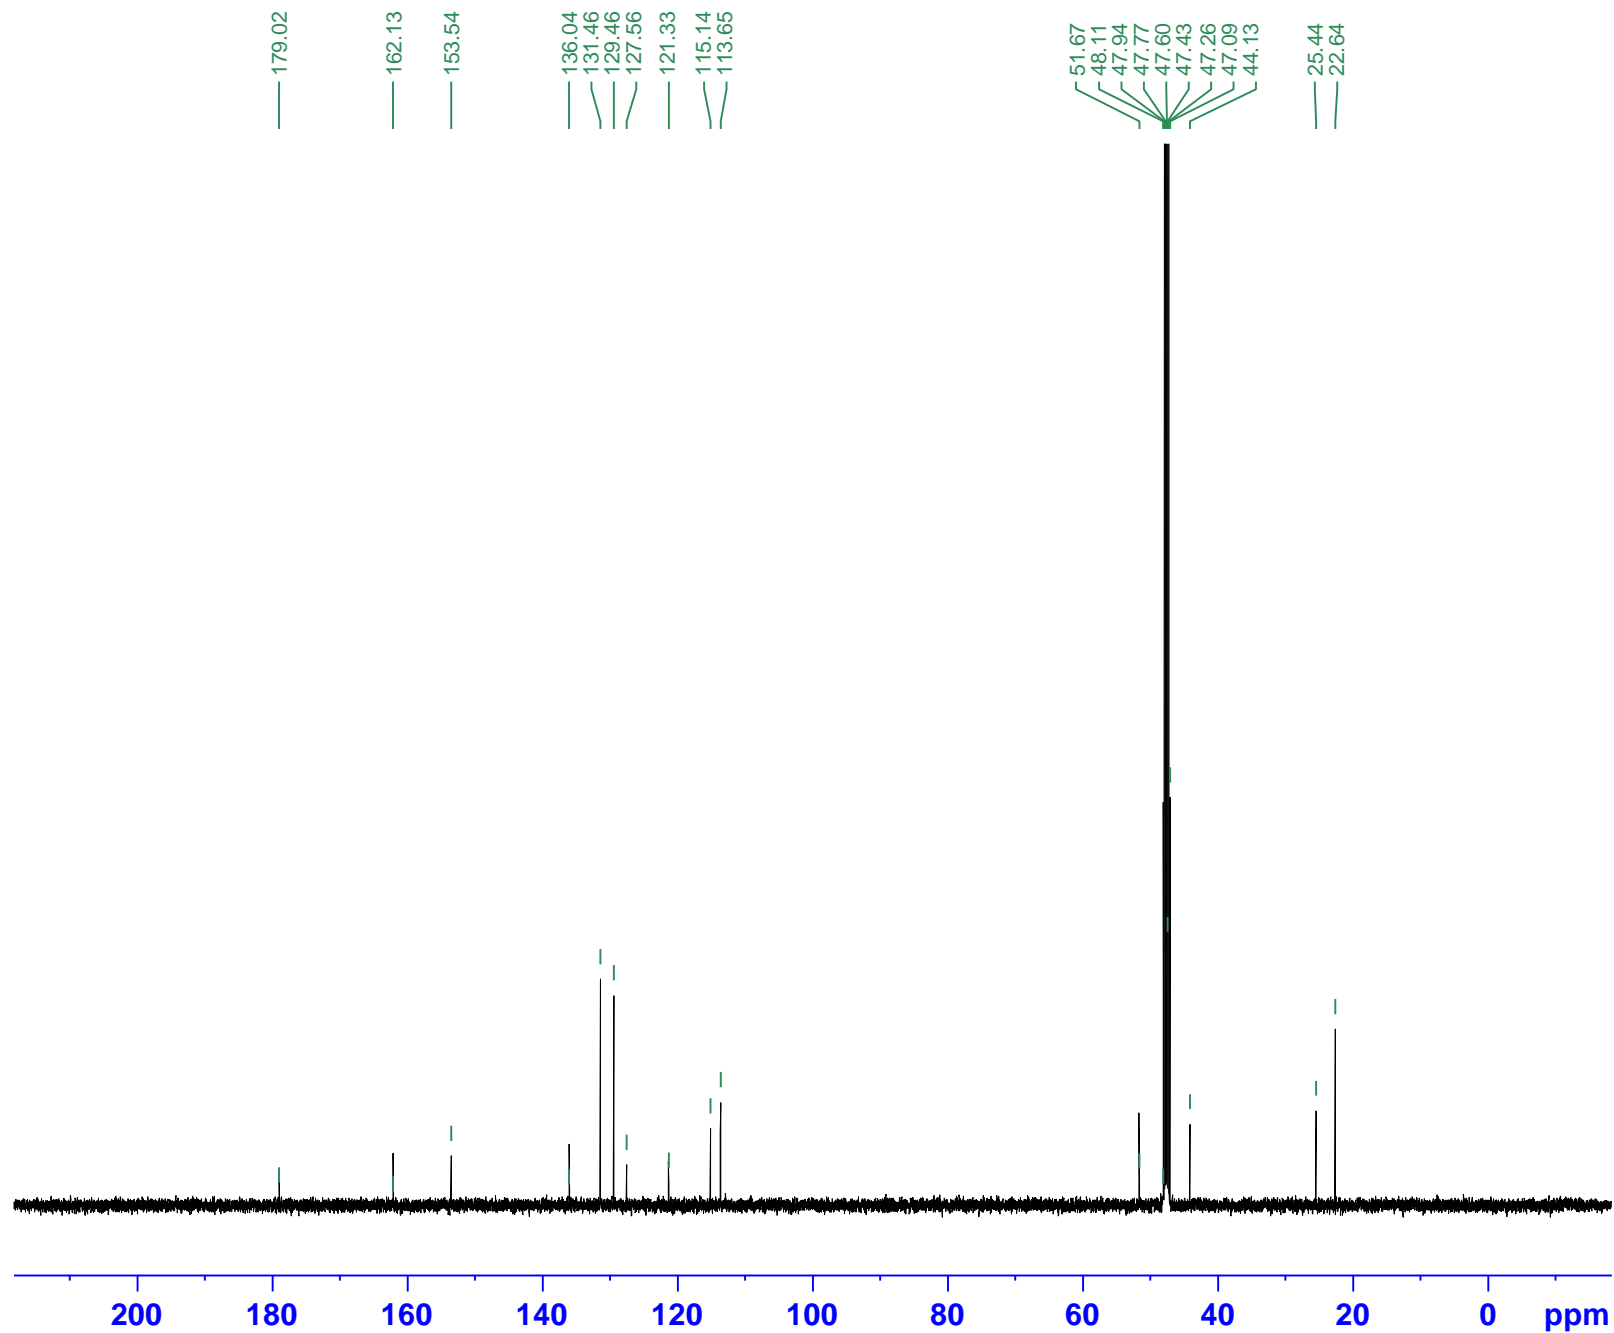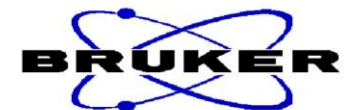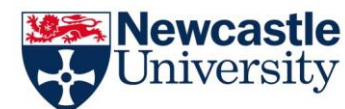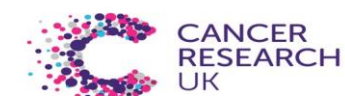

Current Data Parameters  
 NAME SA-500-64  
 EXPNO 11  
 PROCNO 1

F2 - Acquisition  
 Parameters Date\_ 20150213  
 Time 14.25  
 INSTRUM spect  
 PROBHD 5 mm PABBO BB-  
 PULPROG zgpg30  
 TD 65536  
 SOLVENT MeOD  
 NS 256  
 DS 2  
 SMH 29761.904 Hz  
 FIDRES 0.454131 Hz  
 AQ 1.1010048 sec  
 RG 456  
 DV 16.800 usec  
 DE 7.68 usec  
 TE 296.0 K  
 D1 2.0000000 sec  
 D11 0.0300000 sec  
 TD0 1

===== CHANNEL f1 =====  
 SFO1 125.8131151 MHz  
 NUC1 13C  
 P1 9.75 usec  
 PLW1 82.38999939 W

===== CHANNEL f2 =====  
 SFO2 500.3020012 MHz  
 NUC2 1H  
 CPDPRG[2] waltz16  
 PCPD2 80.00 usec  
 PLW2 18.33600044 W  
 PLW12 0.75654000 W  
 PLW13 0.48418999 W

F2 - Processing  
 Parameters 65536  
 SF 125.8005350 MHz  
 WDW EM  
 SSB 0  
 LB 1.00 Hz  
 GB 0  
 PC 1.40

171

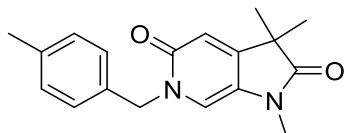

SA-500-74

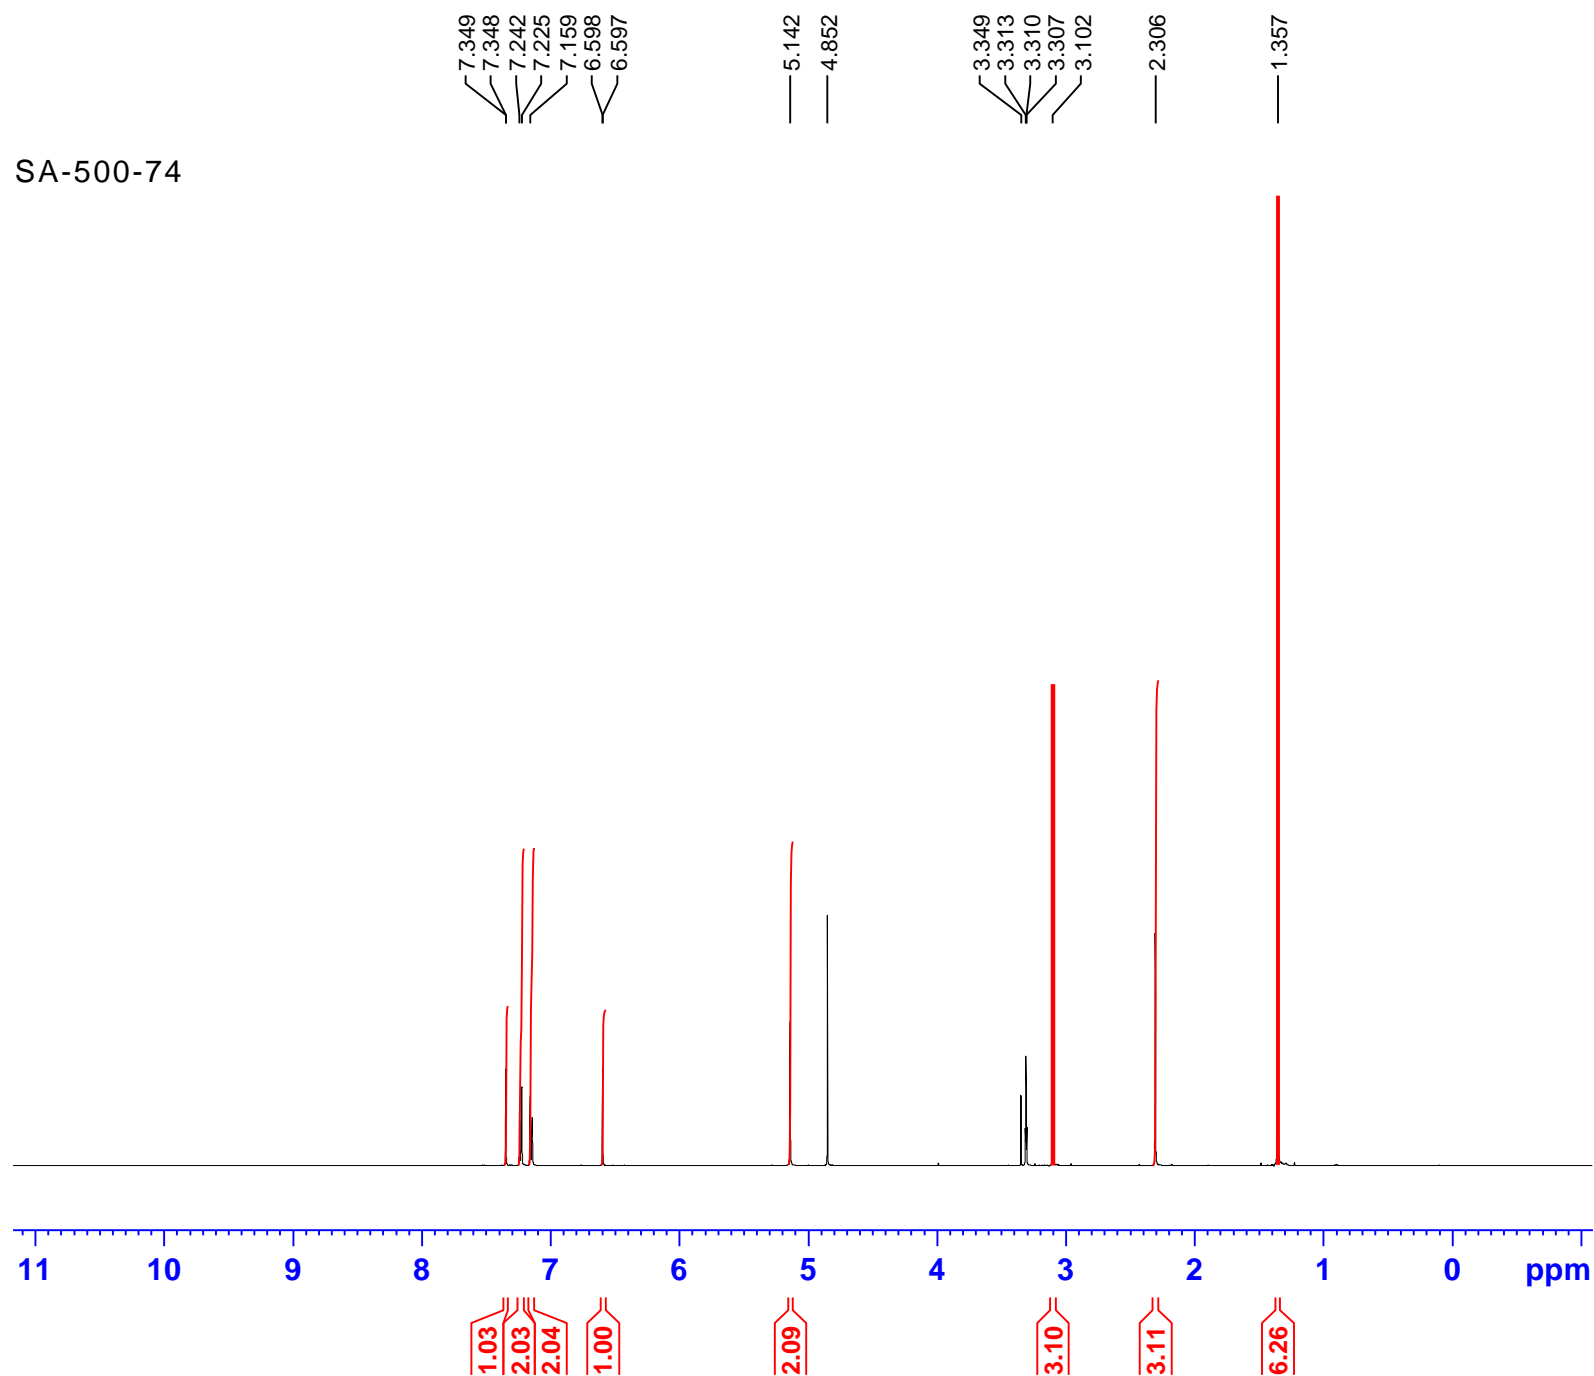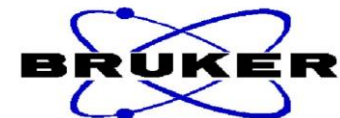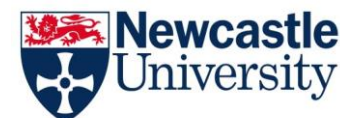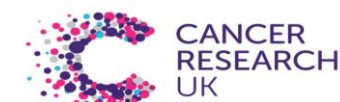

Current Data  
 Name SA-500-74  
 EXPNO 10  
 PROCNO 1

F2 - Acquisition  
 Parameters 20150218  
 Time 14.51  
 INSTRUM spect  
 PROBHD 5 mmPABBO BB-  
 PULPROG zg30  
 TD 65536  
 SOLVENT MeOD  
 NS 16  
 DS 0  
 SWH 10330.578 Hz  
 FIDRES 0.157632 Hz  
 AQ 3.1719425 sec  
 RG 406  
 DW 48.400 usec  
 DE 11.99 usec  
 TE 298.0 K  
 D1 1.00000000 sec  
 TD0 1

===== CHANNEL f1 =====  
 SFO1 500.3030896 MHz  
 NUC1 1H  
 P1 16.25 usec  
 PLW1 18.33600044 W

F2 - Processing parameters SI  
 65536  
 SF 500.3000097 MHz  
 WDW EM  
 SSB 0  
 LB 0.30 Hz  
 GB 0  
 PC 1.00

171



SA-500-74

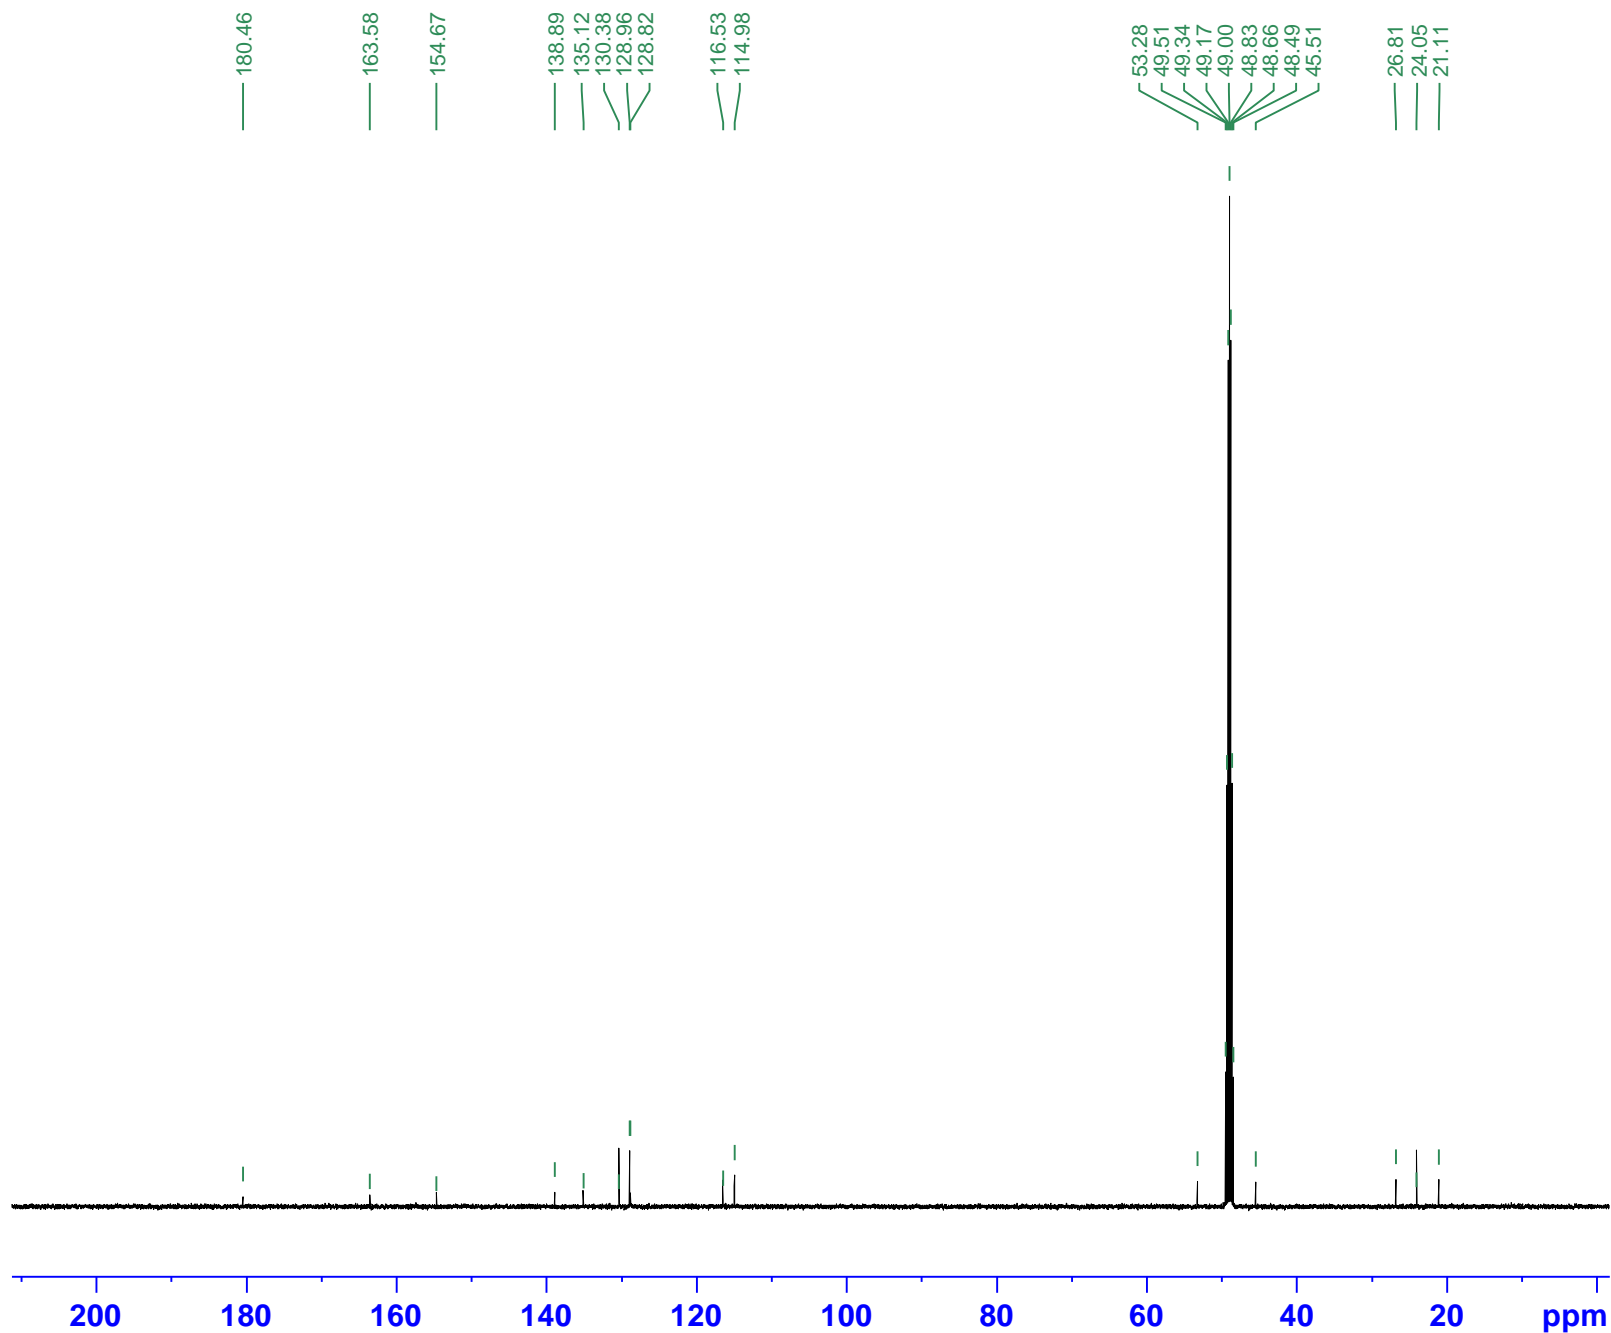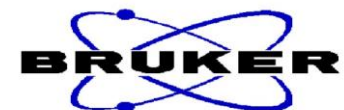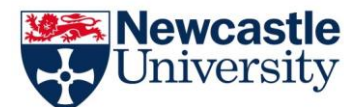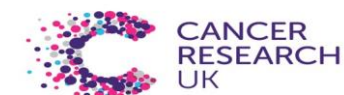

Current Data Parameters  
 NAME SA-500-74  
 EXPNO 11  
 PROCNO 1

F2 - Acquisition  
 Parameters Date\_ 20150218  
 Time 17.40  
 INSTRUM spect  
 PROBHD 5 mm PABBO BB-  
 PULPROG zgpg30  
 TD 65536  
 SOLVENT MeOD  
 NS 256  
 DS 2  
 SMH 29761.904 Hz  
 FIDRES 0.454131 Hz  
 AQ 1.1010048 sec  
 RG 456  
 DV 16.800 usec  
 DE 7.68 usec  
 TE 298.0 K  
 D1 2.00000000 sec  
 D11 0.03000000 sec  
 TD0 1

===== CHANNEL f1 =====  
 SFO1 125.8131151 MHz  
 NUC1 13C  
 P1 9.75 usec  
 PLW1 82.38999939 W

===== CHANNEL f2 =====  
 SFO2 500.3020012 MHz  
 NUC2 1H  
 CPDPRG2 waltz16  
 PCPD2 80.00 usec  
 PLW2 18.33600044 W  
 PLW12 0.75654000 W  
 PLW13 0.48418999 W

F2 - Processing  
 Parameters 65536  
 SF 125.8003589 MHz  
 WDV EM  
 SSB 0  
 LB 1.00 Hz  
 GB 0  
 PC 1.40

17m

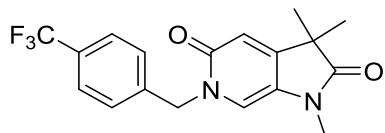

SA-500-68

7.657  
7.641  
7.519  
7.503  
7.439  
6.622  
5.268  
4.852  
3.316  
3.313  
3.310  
3.307  
3.126  
1.372

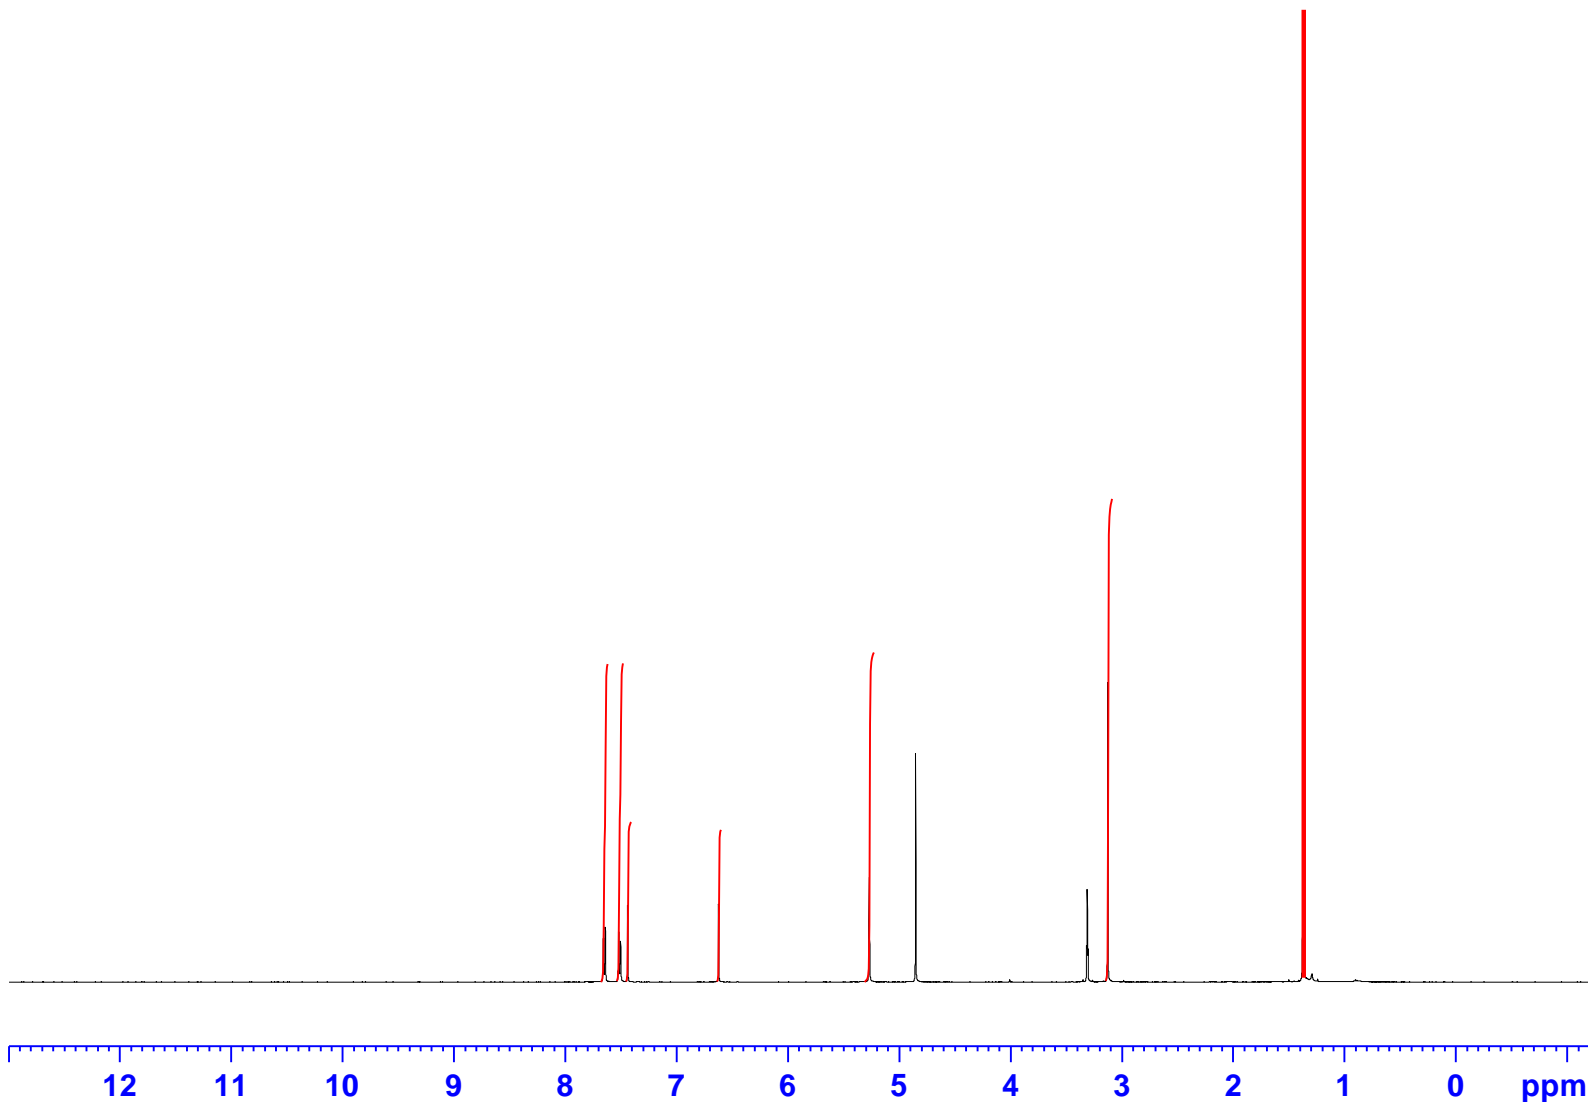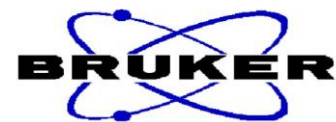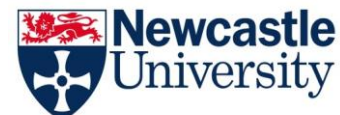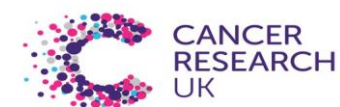

Current Data  
NAME SA-500-68  
EXPNO 10  
PROCNO 1

F2 - Acquisition  
Data 20150216  
Time 16.39  
INSTRUM spect  
PROBHD 5 mm PABBO BB-  
PULPROG zg30  
TD 65536  
SOLVENT MeOD  
NS 16  
DS 0  
SWH 10330.578 Hz  
FIDRES 0.157632 Hz  
AQ 3.1719425 sec  
RG 406  
DW 48.400 usec  
DE 11.99 usec  
TE 298.1 K  
D1 1.00000000 sec  
TD0 1

==== CHANNEL f1 =====  
SFO1 500.3030896 MHz  
NUC1 1H  
P1 16.25 usec  
PLW1 18.33600044 W

F2 - Processing parameters SI  
65536  
SF 500.3000097 MHz  
WDW EM  
SSB 0  
LB 0.30 Hz  
GB 0  
PC 1.00

17m

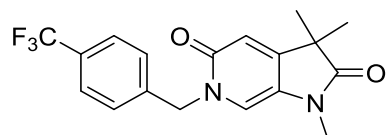

SA-500-68

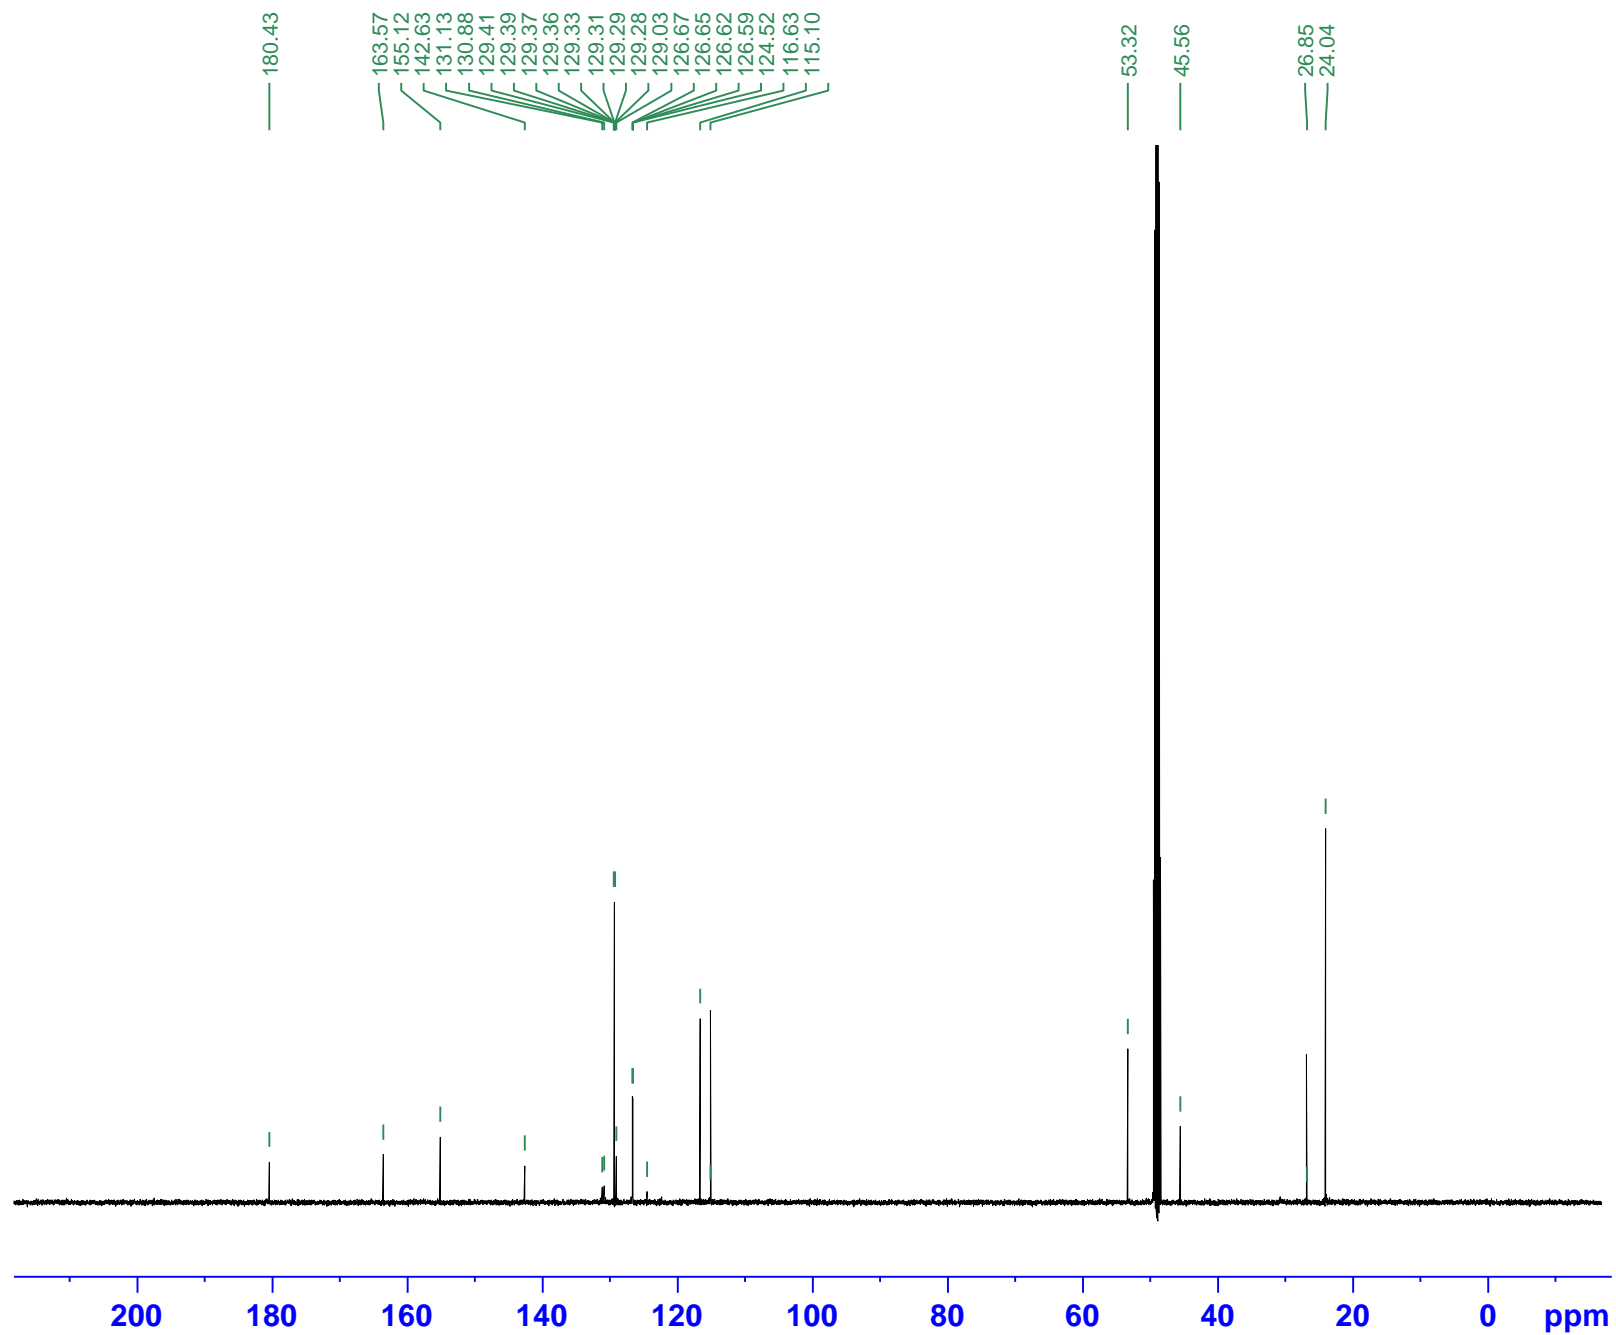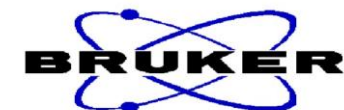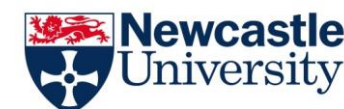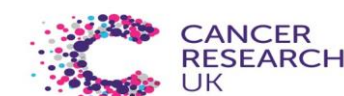

Current Data Parameters  
 NAME SA-500-68  
 EXPNO 15  
 PROCNO 1

F2 - Acquisition  
 Parameters Date\_ 20150216  
 Time 22.24  
 INSTRUM spect  
 PROBHD 5 mm PABBO BB-  
 PULPROG zgpg  
 TD 26782  
 SOLVENT MeOD  
 NS 2048  
 DS 2  
 SMH 29761.904 Hz  
 FIDRES 1.111265 Hz  
 AQ 0.4499376 sec  
 RG 456  
 DV 16.800 usec  
 DE 7.72 usec  
 TE 298.0 K  
 D1 5.00000000 sec  
 D11 0.03000000 sec  
 TD0 1

===== CHANNEL f1 =====

SFO1 125.8131151 MHz  
 NUC1 13C  
 P1 9.75 usec  
 PLW1 82.38999939 W

===== CHANNEL f2 =====

SFO2 500.3020012 MHz  
 NUC2 1H  
 CPDPRG2 waltz16  
 PCPD2 80.00 usec  
 PLW2 18.33600044 W  
 PLW12 0.75654000 W  
 PLW13 0.48418999 W

F2 - Processing  
 Parameters 65536  
 SF 125.8005350 MHz  
 WDW EM  
 SSB 0  
 LB 1.00 Hz  
 GB 0  
 PC 1.40

17n

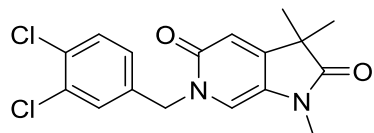

SA-500-100

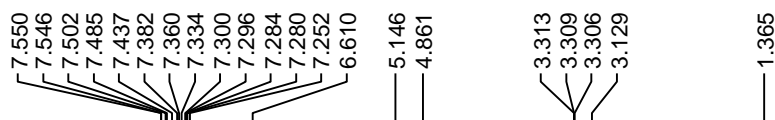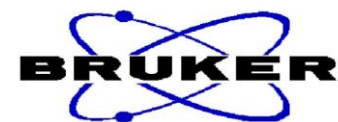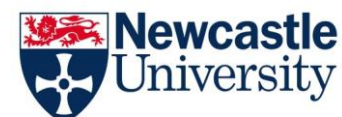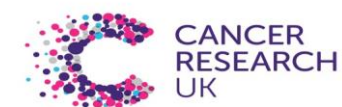

Current Data  
NAME SA-500-100-DRIED  
EXPNO 10  
PROCNO 1

F2 - Acquisition  
Date\_ 20150317  
Time 16.52  
INSTRUM spect  
PROBHD 5 mm PABBO BB-  
PULPROG zg30  
TD 65536  
SOLVENT MeOD  
NS 16  
DS 0  
SWH 10330.578 Hz  
FIDRES 0.157632 Hz  
AQ 3.1719425 sec  
RG 456  
DW 48.400 usec  
DE 11.99 usec  
TE 296.8 K  
D1 1.00000000 sec  
TD0 1

==== CHANNEL f1 =====  
SFO1 500.3030896 MHz  
NUC1 1H  
P1 16.25 usec  
PLW1 18.33600044 W

F2 - Processing parameters SI  
65536  
SF 500.3000099 MHz  
WDW EM  
SSB 0  
LB 0.30 Hz  
GB 0  
PC 1.00

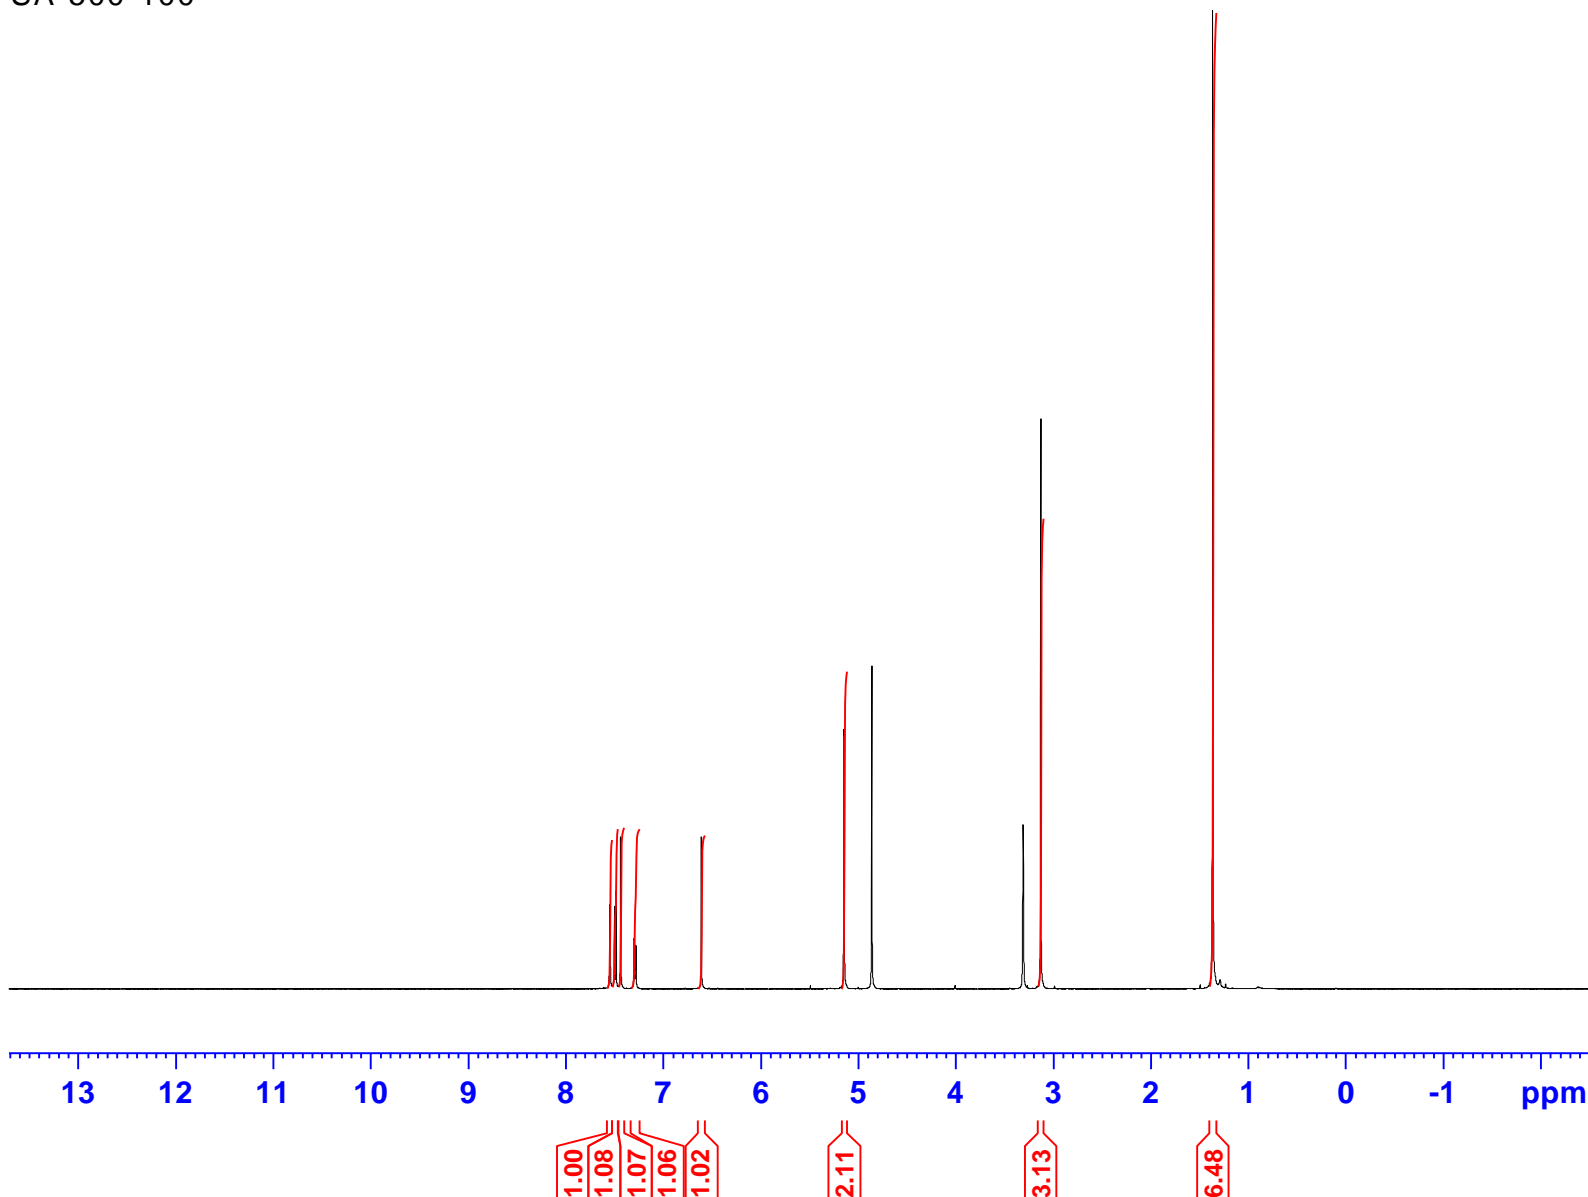



17n

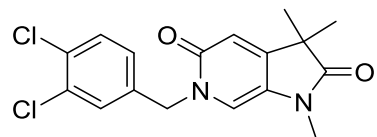

SA-500-100

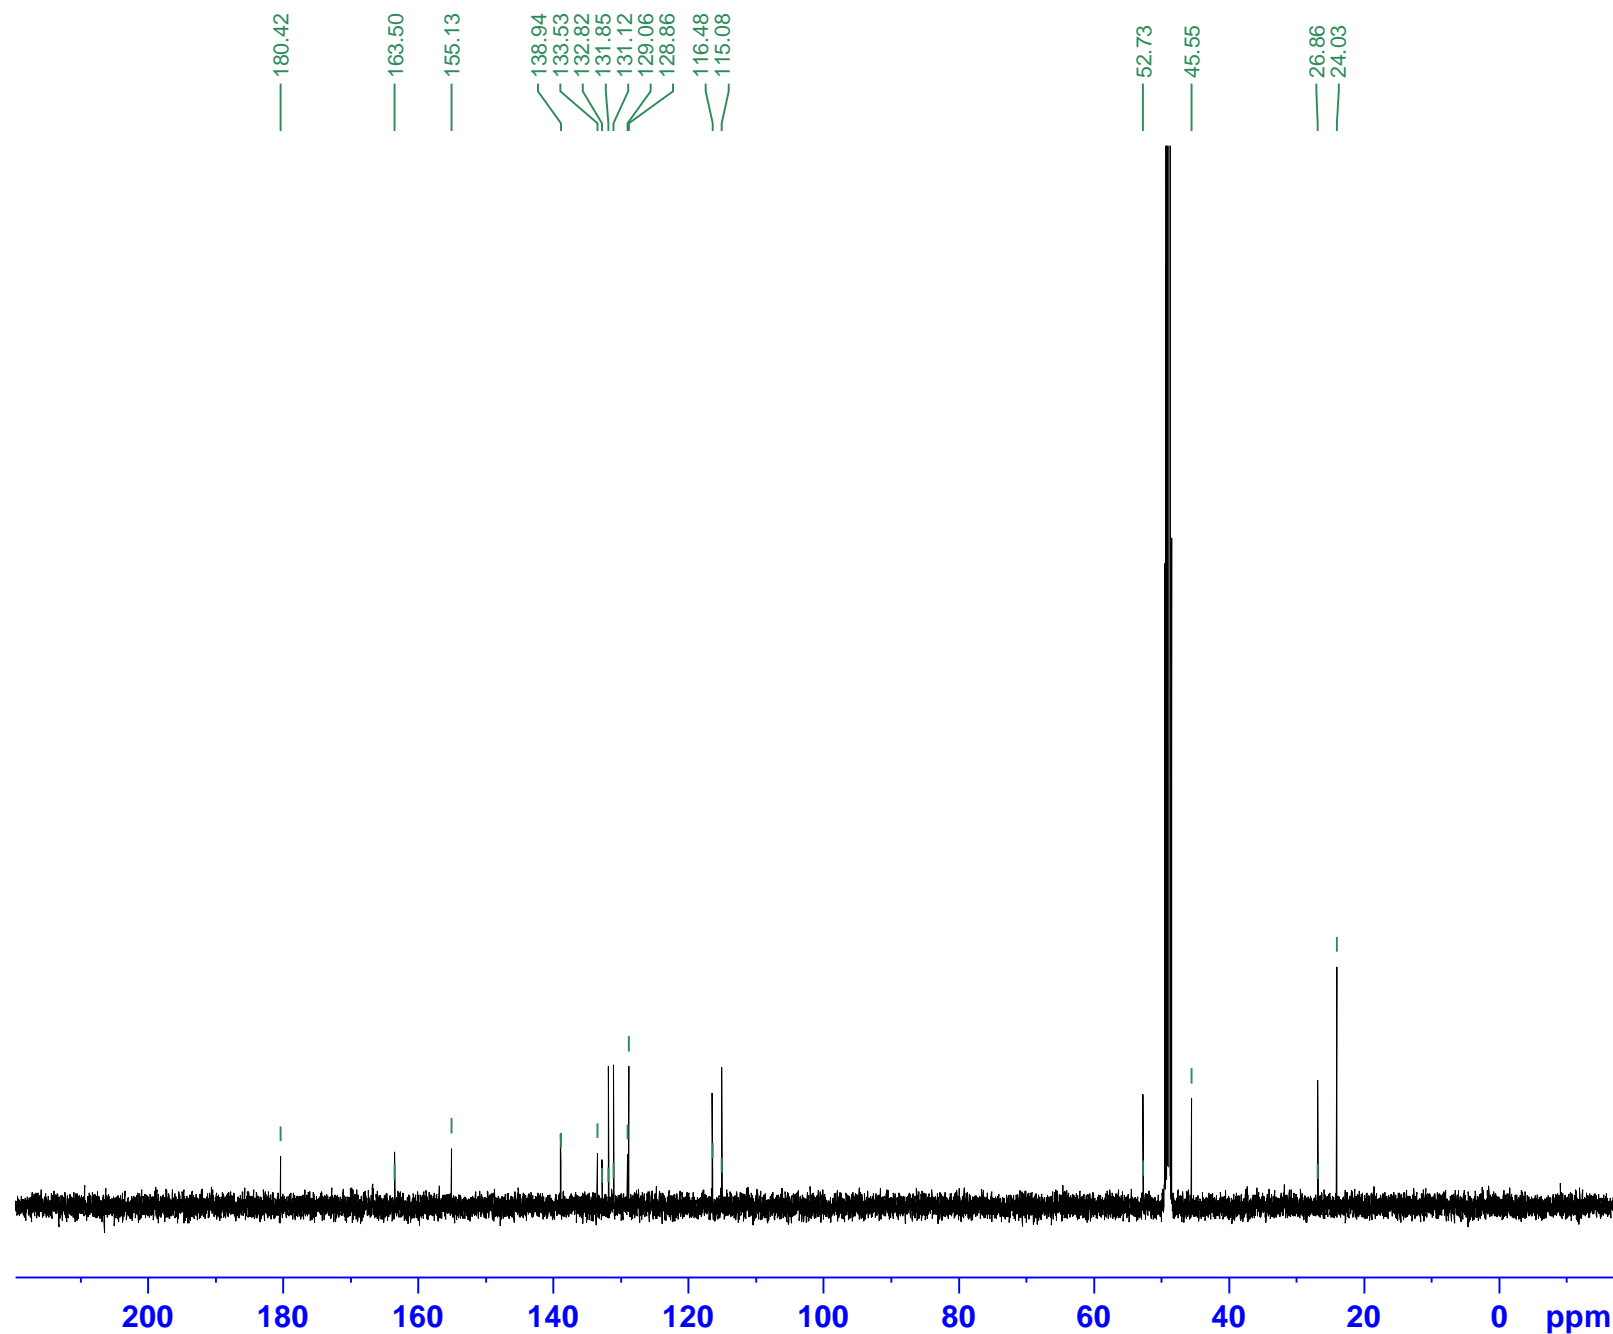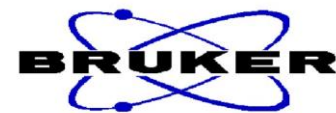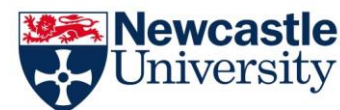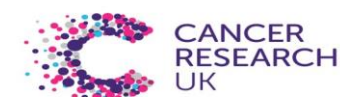

Current Data Parameters  
NAME SA-500-100-DRIED  
EXPNO 11  
PROCNO 1

F2 - Acquisition  
Parameters Date\_ 20150317  
Time 23.06  
INSTRUM spect  
PROBHD 5 mm PABBO BB-  
PULPROG zgpg30  
TD 65536  
SOLVENT MeOD  
NS 256  
DS 2  
SWH 29761.904 Hz  
FIDRES 0.454131 Hz  
AQ 1.1010048 sec  
RG 575  
DW 16.800 usec  
DE 7.68 usec  
TE 297.0 K  
D1 2.0000000 sec  
D11 0.03000000 sec  
TD0 1

===== CHANNEL f1 =====  
SFO1 125.8131151 MHz  
NUC1 13C  
P1 9.75 usec  
PLW1 82.38999939 W

===== CHANNEL f2 =====  
SFO2 500.3020012 MHz  
NUC2 1H  
CPDPRG2 waltz16  
PCPD2 80.00 usec  
PLW2 18.33600044 W  
PLW12 0.75654000 W  
PLW13 0.48418999 W

F2 - Processing  
Parameters 65536  
SF 125.8003589 MHz  
WDW EM  
SSB 0  
LB 1.00 Hz  
GB 0  
PC 1.40

17o

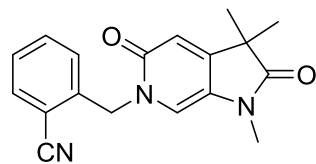

SA-500-26

7.378 6.519 5.287 4.805 3.215 3.211 3.208 3.205 3.202 3.039 1.285

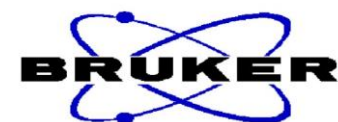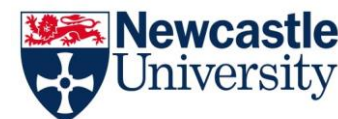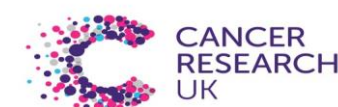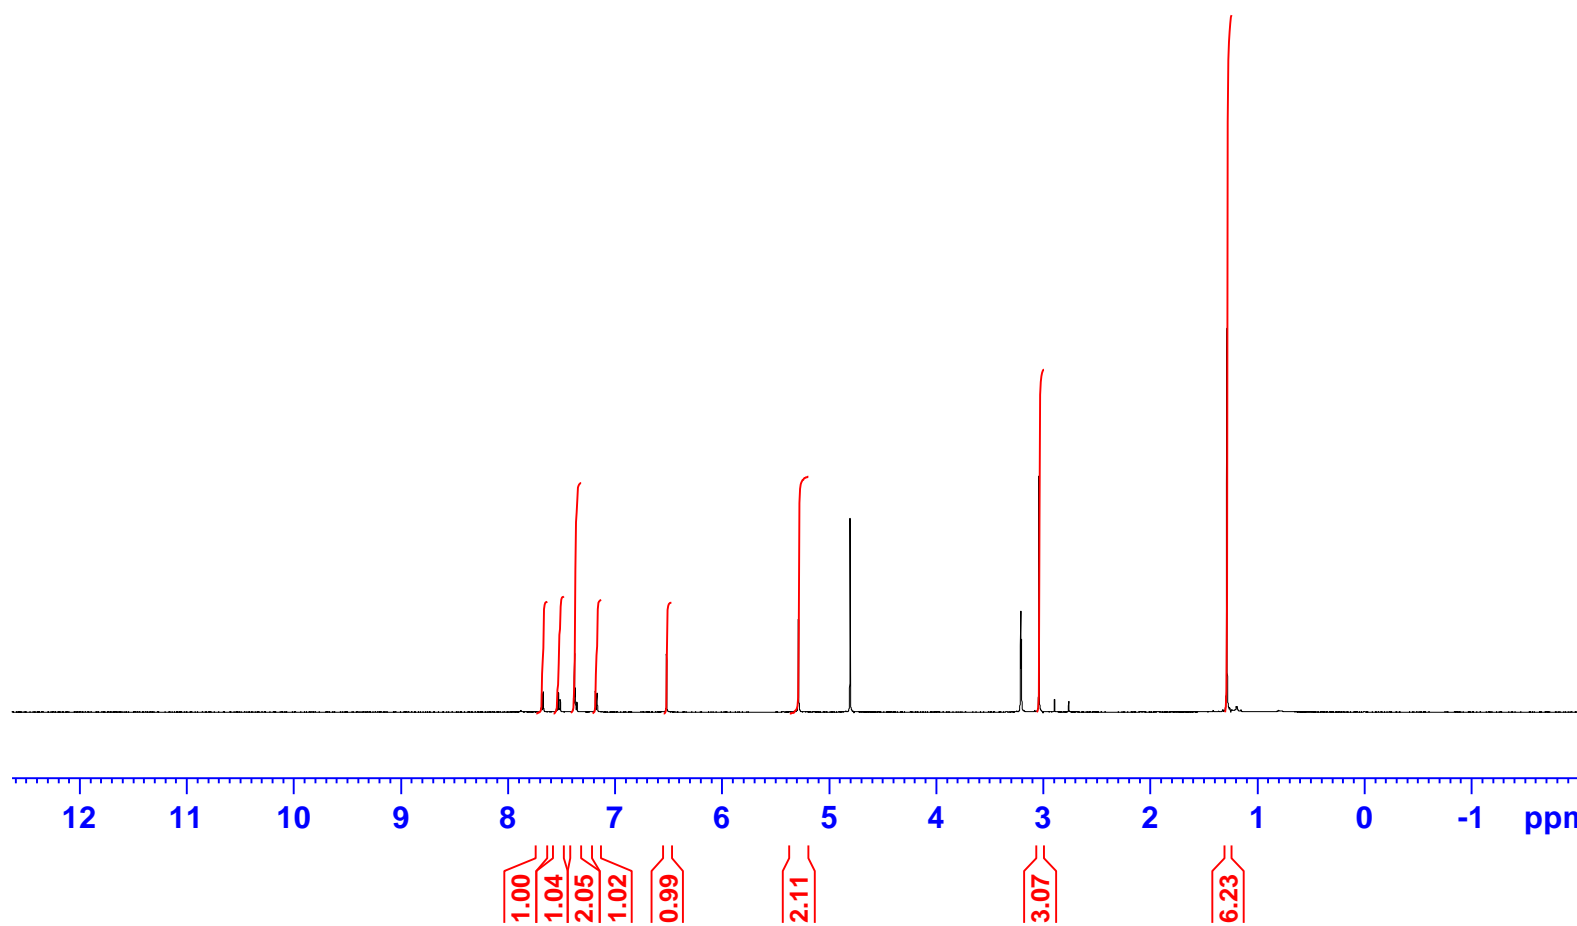

Current Data  
 Name SA-500-26  
 EXPNO 10  
 PROCNO 1

F2 - Acquisition  
 Parameters 20150122  
 Time 15.02  
 INSTRUM spect  
 PROBHD 5 mm PABBO BB-  
 PULPROG zg30  
 TD 65536  
 SOLVENT MeOD  
 NS 16  
 DS 0  
 SWH 10330.578 Hz  
 FIDRES 0.157632 Hz  
 AQ 3.1719425 sec  
 RG 406  
 DW 48.400 usec  
 DE 11.99 usec  
 TE 292.3 K  
 D1 1.0000000 sec  
 TDO 1

==== CHANNEL f1 =====  
 SFO1 500.3030896 MHz  
 NUC1 1H  
 P1 16.25 usec  
 PLW1 18.3360044 W

F2 - Processing parameters SI  
 65536  
 SF 500.3000605 MHz  
 WDW EM  
 SSB 0  
 LB 0.30 Hz  
 GB 0  
 PC 1.00

17o

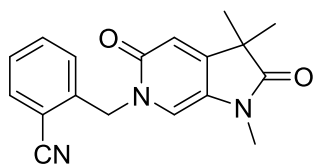

SA-500-26 11 1 z:\data\SA\nmr

SA-500-26

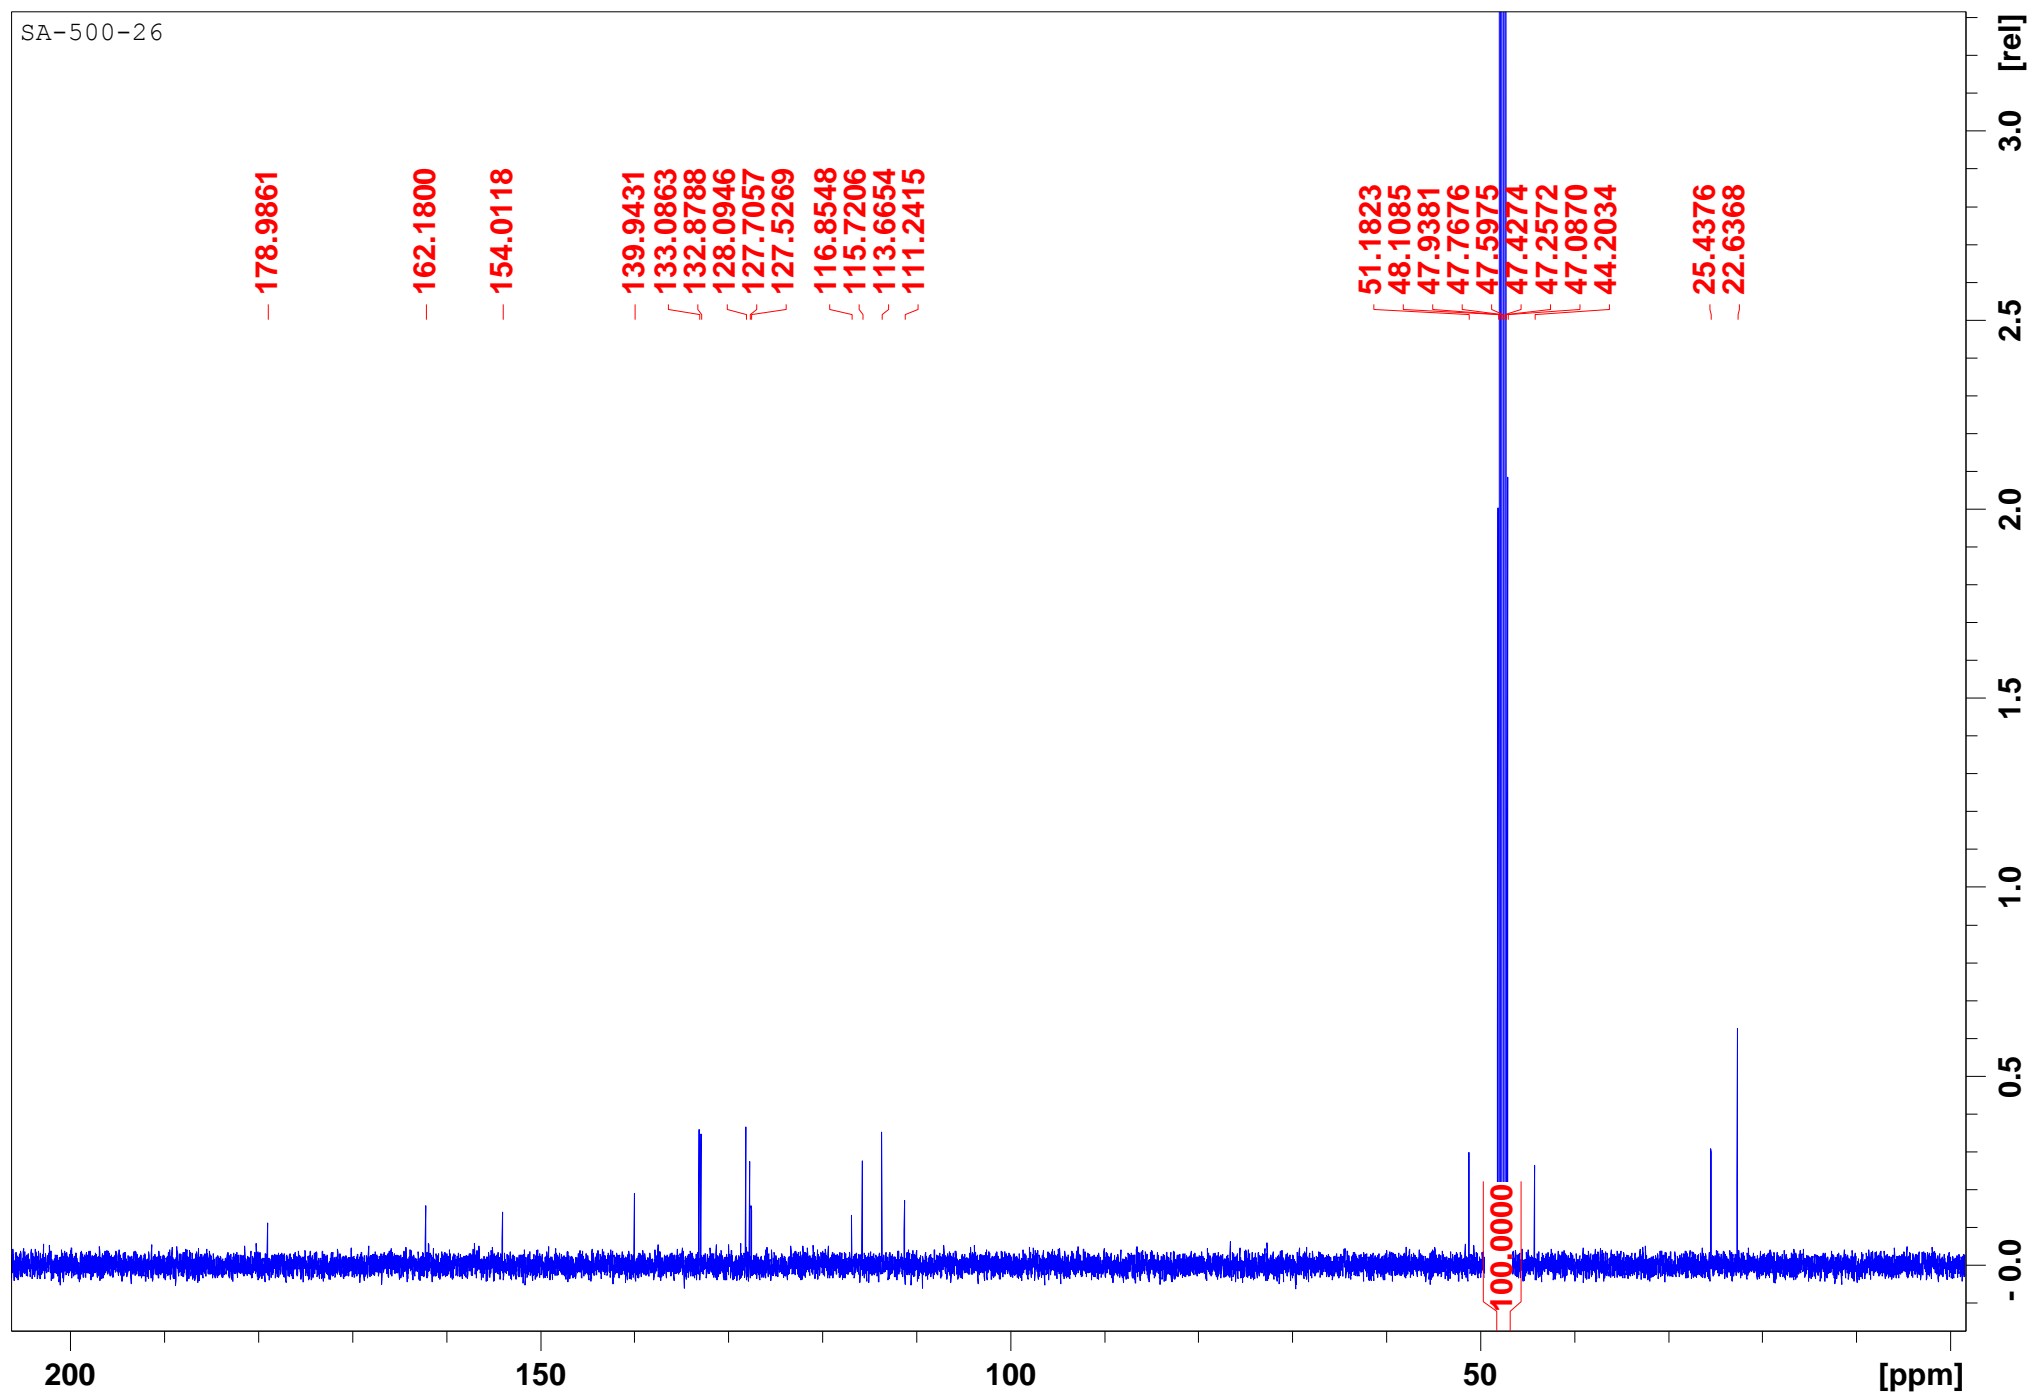

17p

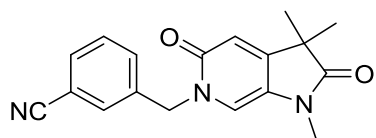

7.641  
7.435  
7.383  
6.517  
5.116  
4.806  
3.215  
3.211  
3.208  
3.205  
3.201  
3.036  
1.266

SA-500-32

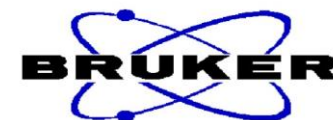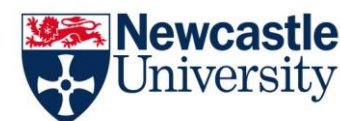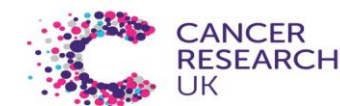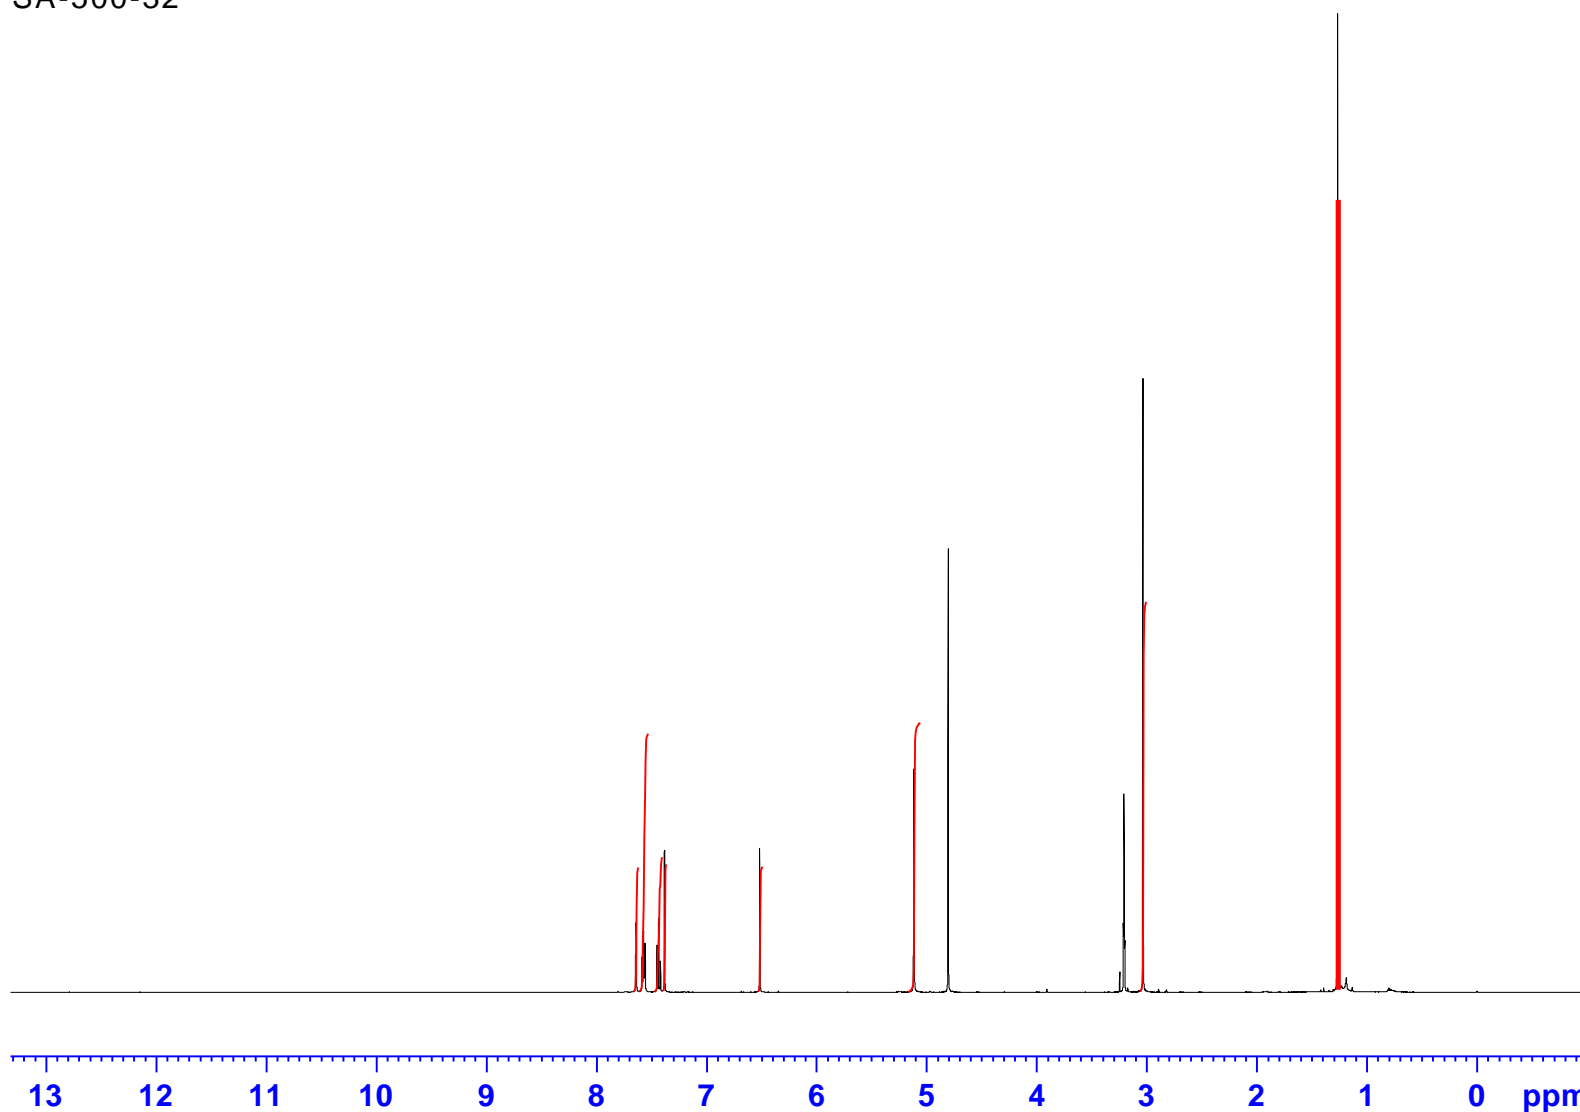

Current Data  
NAME SA-500-32  
EXPNO 10  
PROCNO 1

F2 - Acquisition  
Data parameters 20150122  
Time 15.12  
INSTRUM spect  
PROBHD 5 mm PABBO BB-  
PULPROG zg30  
TD 65536  
SOLVENT MeOD  
NS 16  
DS 0  
SMH 10330.578 Hz  
FIDRES 0.157632 Hz  
AQ 3.1719425 sec  
RG 362  
DW 48.400 usec  
DE 11.99 usec  
TE 292.2 K  
D1 1.00000000 sec  
TD0 1

==== CHANNEL f1 =====  
SFO1 500.3030896 MHz  
NUC1 1H  
P1 16.25 usec  
PLW1 18.33600044 W

F2 - Processing parameters SI  
65536  
SF 500.300606 MHz  
WDW EM  
SSB 0  
LB 0.30 Hz  
GB 0  
PC 1.00

17p



SA-500-32

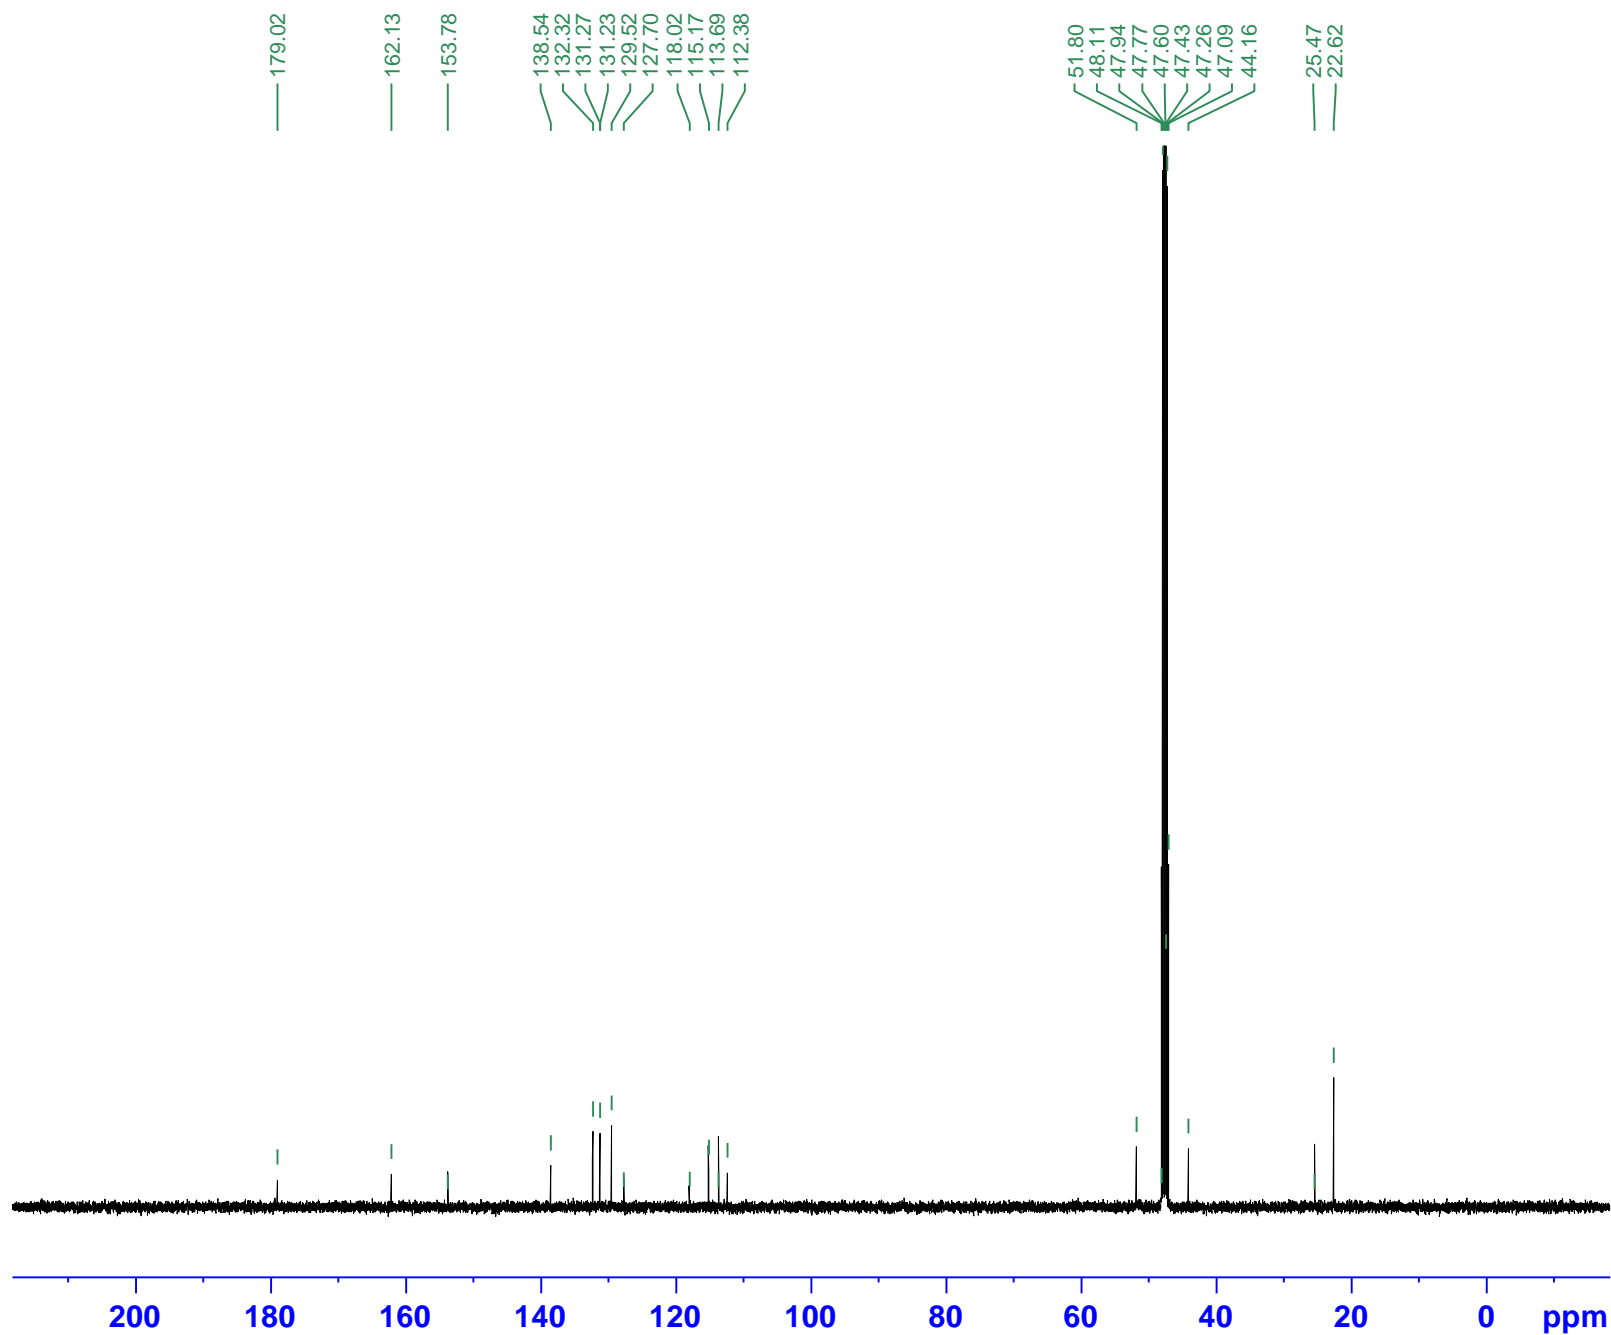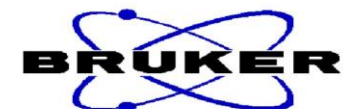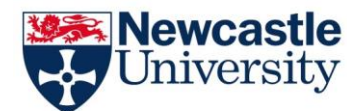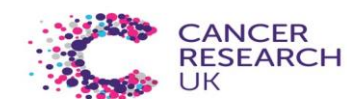

Current Data Parameters  
 NAME SA-500-32  
 EXPNO 11  
 PROCNO 1

F2 - Acquisition  
 Parameters Date\_ 20150122  
 Time 15.49  
 INSTRUM spect  
 PROBHD 5 mm PABBO BB-  
 PULPROG zgpg30  
 TD 65536  
 SOLVENT MeOD  
 NS 256  
 DS 2  
 SWH 29761.904 Hz  
 FIDRES 0.454131 Hz  
 AQ 1.1010048 sec  
 RG 456  
 DW 16.800 usec  
 DE 7.68 usec  
 TE 294.9 K  
 D1 2.00000000 sec  
 D11 0.03000000 sec  
 TD0 1

===== CHANNEL f1 =====  
 SFO1 125.8131151 MHz  
 NUC1 13C  
 P1 9.75 usec  
 PLW1 82.38999939 W

===== CHANNEL f2 =====  
 SFO2 500.3020012 MHz  
 NUC2 1H  
 CPDPRG2 waltz16  
 PCPD2 80.00 usec  
 PLW2 18.33600044 W  
 PLW12 0.75654000 W  
 PLW13 0.48418999 W

F2 - Processing  
 Parameters 65536  
 SF 125.8005350 MHz  
 WDW EM  
 SSB 0  
 LB 1.00 Hz  
 GB 0  
 PC 1.40

17q

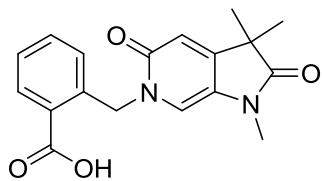

7.942  
7.940  
7.927  
7.925  
7.394  
7.392  
7.379  
7.377  
7.364  
7.361  
7.318  
7.298  
7.282  
7.269  
6.900  
6.884  
6.545  
5.520  
4.798  
3.215  
3.212  
3.209  
3.205  
3.202  
2.998  
1.296

SA-500-44

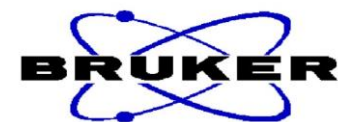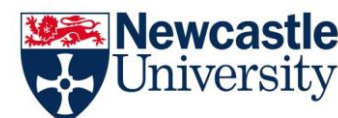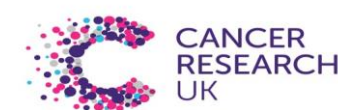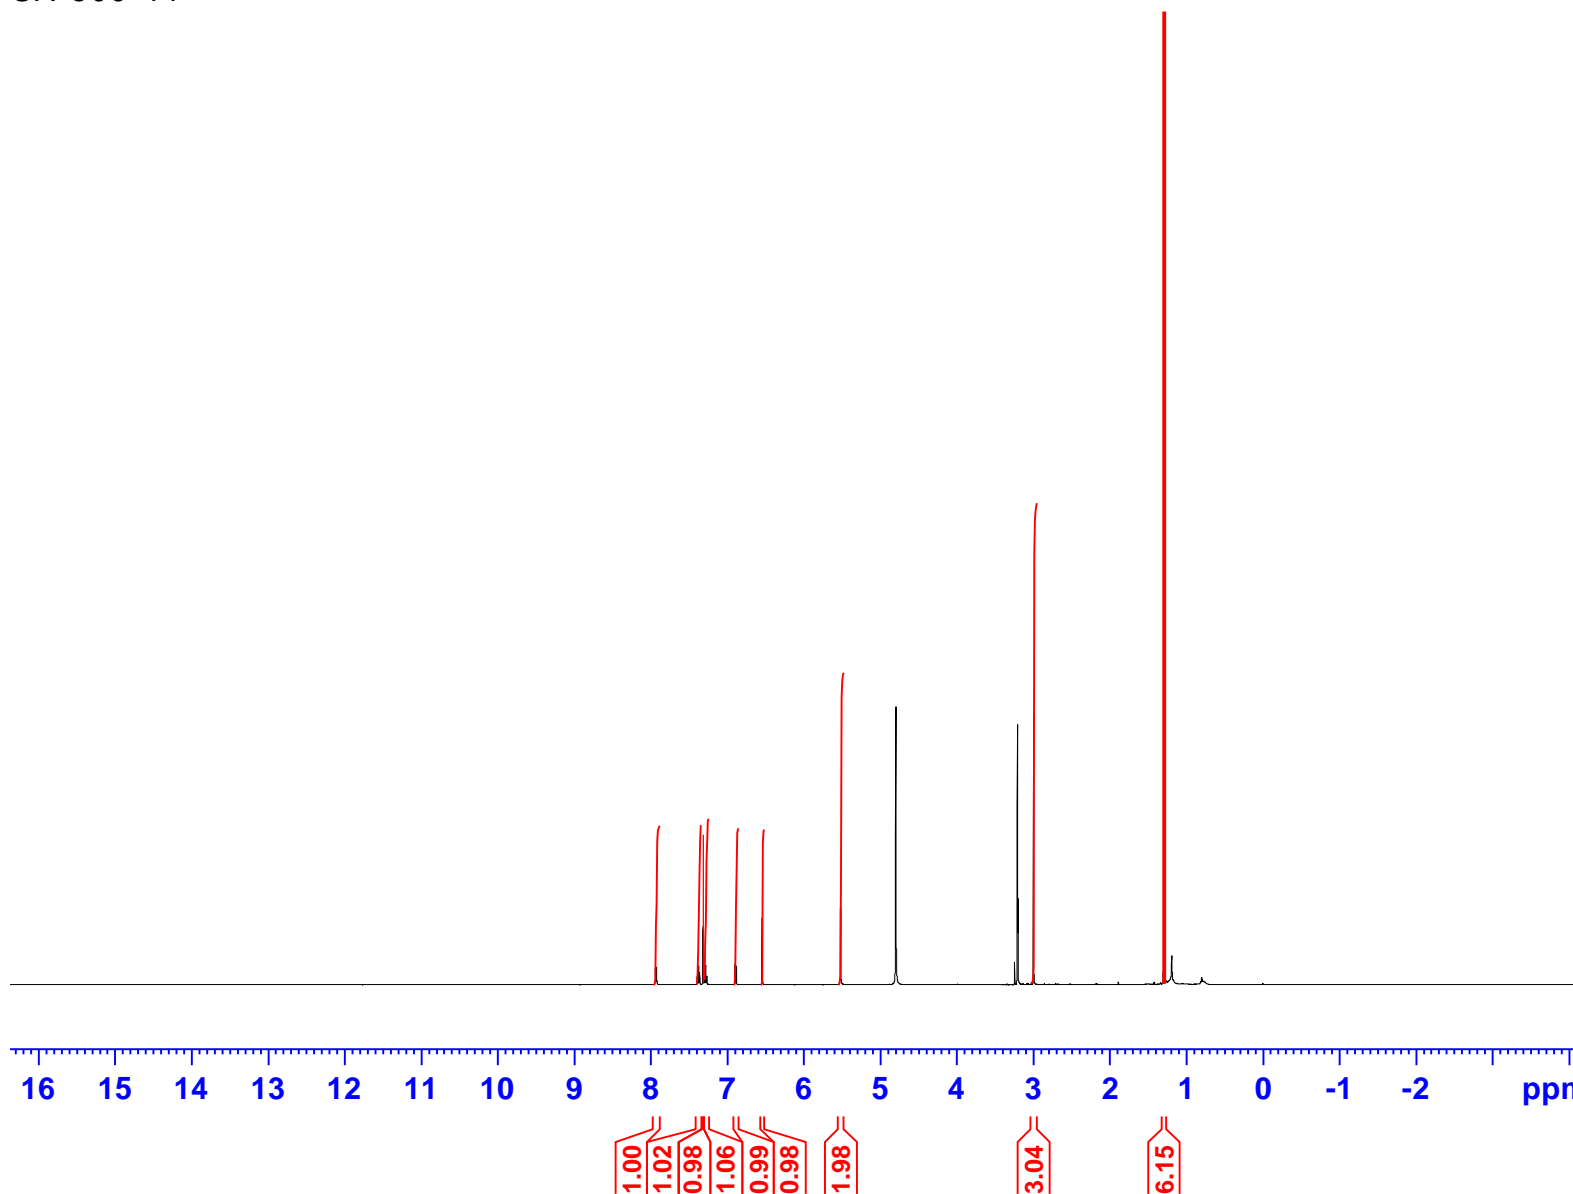

Current Data  
NAME SA-500-44  
EXPNO 10  
PROCNO 1

F2 - Acquisition  
Data Parameters 20150128  
Time 10.40  
INSTRUM spect  
PROBHD 5 mm PABBO BB-  
PULPROG zg30  
TD 65536  
SOLVENT MeOD  
NS 16  
DS 0  
SWH 10330.578 Hz  
FIDRES 0.157632 Hz  
AQ 3.1719425 sec  
RG 456  
DW 48.400 usec  
DE 11.99 usec  
TE 293.7 K  
D1 1.00000000 sec  
TDO 1

==== CHANNEL f1 =====  
SFO1 500.3030896 MHz  
NUC1 1H  
P1 16.25 usec  
PLW1 18.33600044 W

F2 - Processing parameters SI  
65536  
SF 500.3000603 MHz  
WDW EM  
SSB 0  
LB 0.30 Hz  
GB 0  
PC 1.00

17q

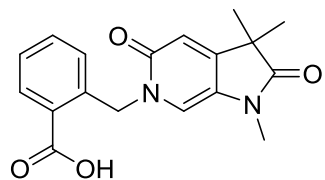

SA-500-44

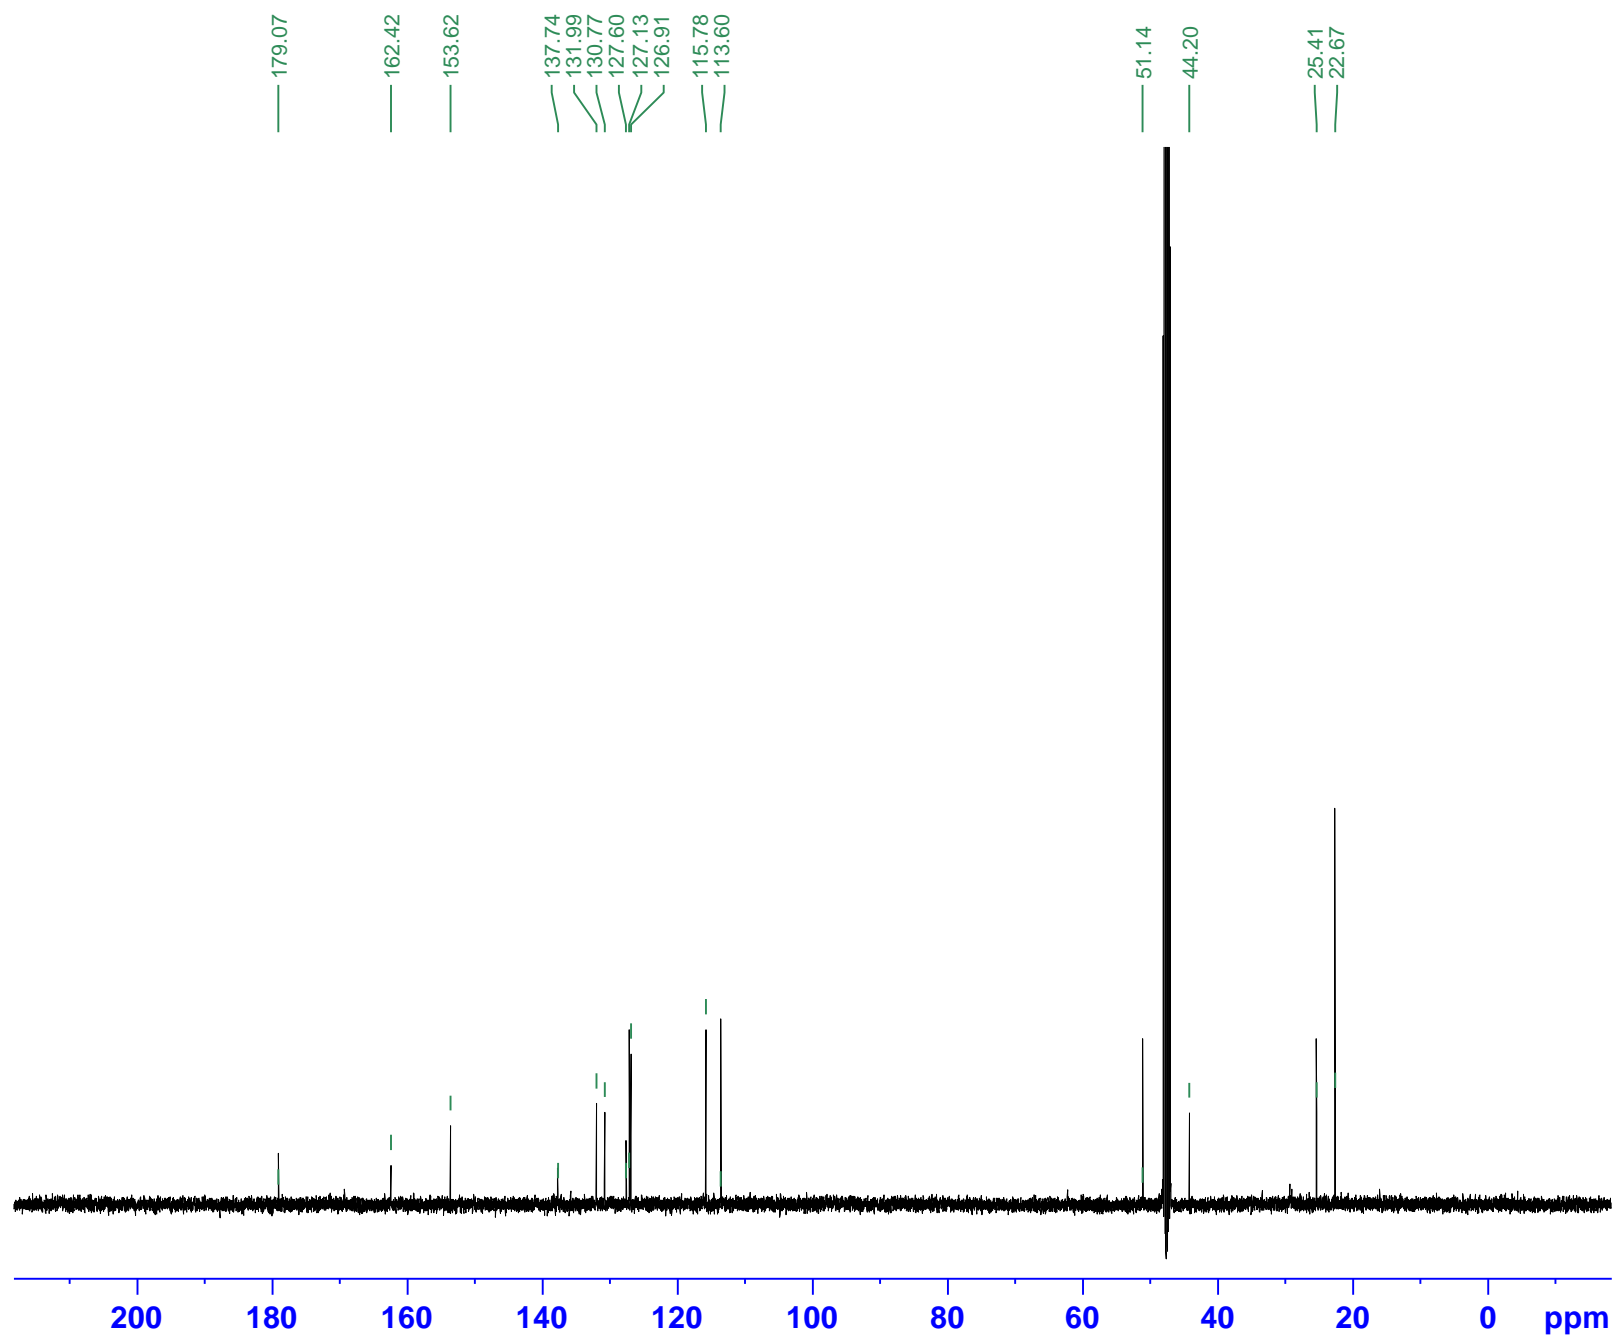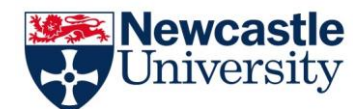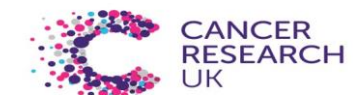

Current Data Parameters  
 NAME SA-500-44  
 EXPNO 12  
 PROCNO 1

F2 - Acquisition  
 Parameters Date\_ 20150128  
 Time 21.14  
 INSTRUM spect  
 PROBHD 5 mm PABBO BB-  
 PULPROG zgpg  
 TD 26782  
 SOLVENT MeOD  
 NS 2048  
 DS 2  
 SMH 29761.904 Hz  
 FIDRES 1.111265 Hz  
 AQ 0.4499376 sec  
 RG 724  
 DV 16.800 usec  
 DE 7.72 usec  
 TE 296.4 K  
 D1 5.00000000 sec  
 D11 0.03000000 sec  
 TD0 1

===== CHANNEL f1 =====  
 SFO1 125.8131151 MHz  
 NUC1 13C  
 P1 9.75 usec  
 PLW1 82.38999939 W

===== CHANNEL f2 =====  
 SFO2 500.3020012 MHz  
 NUC2 1H  
 CPDPRG2 waltz16  
 PCPD2 80.00 usec  
 PLW2 18.33600044 W  
 PLW12 0.75654000 W  
 PLW13 0.48418999 W

F2 - Processing  
 Parameters 65536  
 SF 125.8005350 MHz  
 WDW EM  
 SSB 0  
 LB 1.00 Hz  
 GB 0  
 PC 1.40

18a

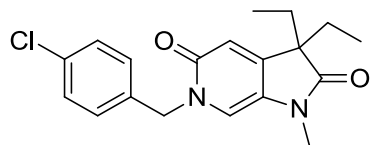

"dcm-494-161-a cdcl3" 10 1 "X:\Old Server\DCM\nmr"

DCM-494-161-A CDCL3

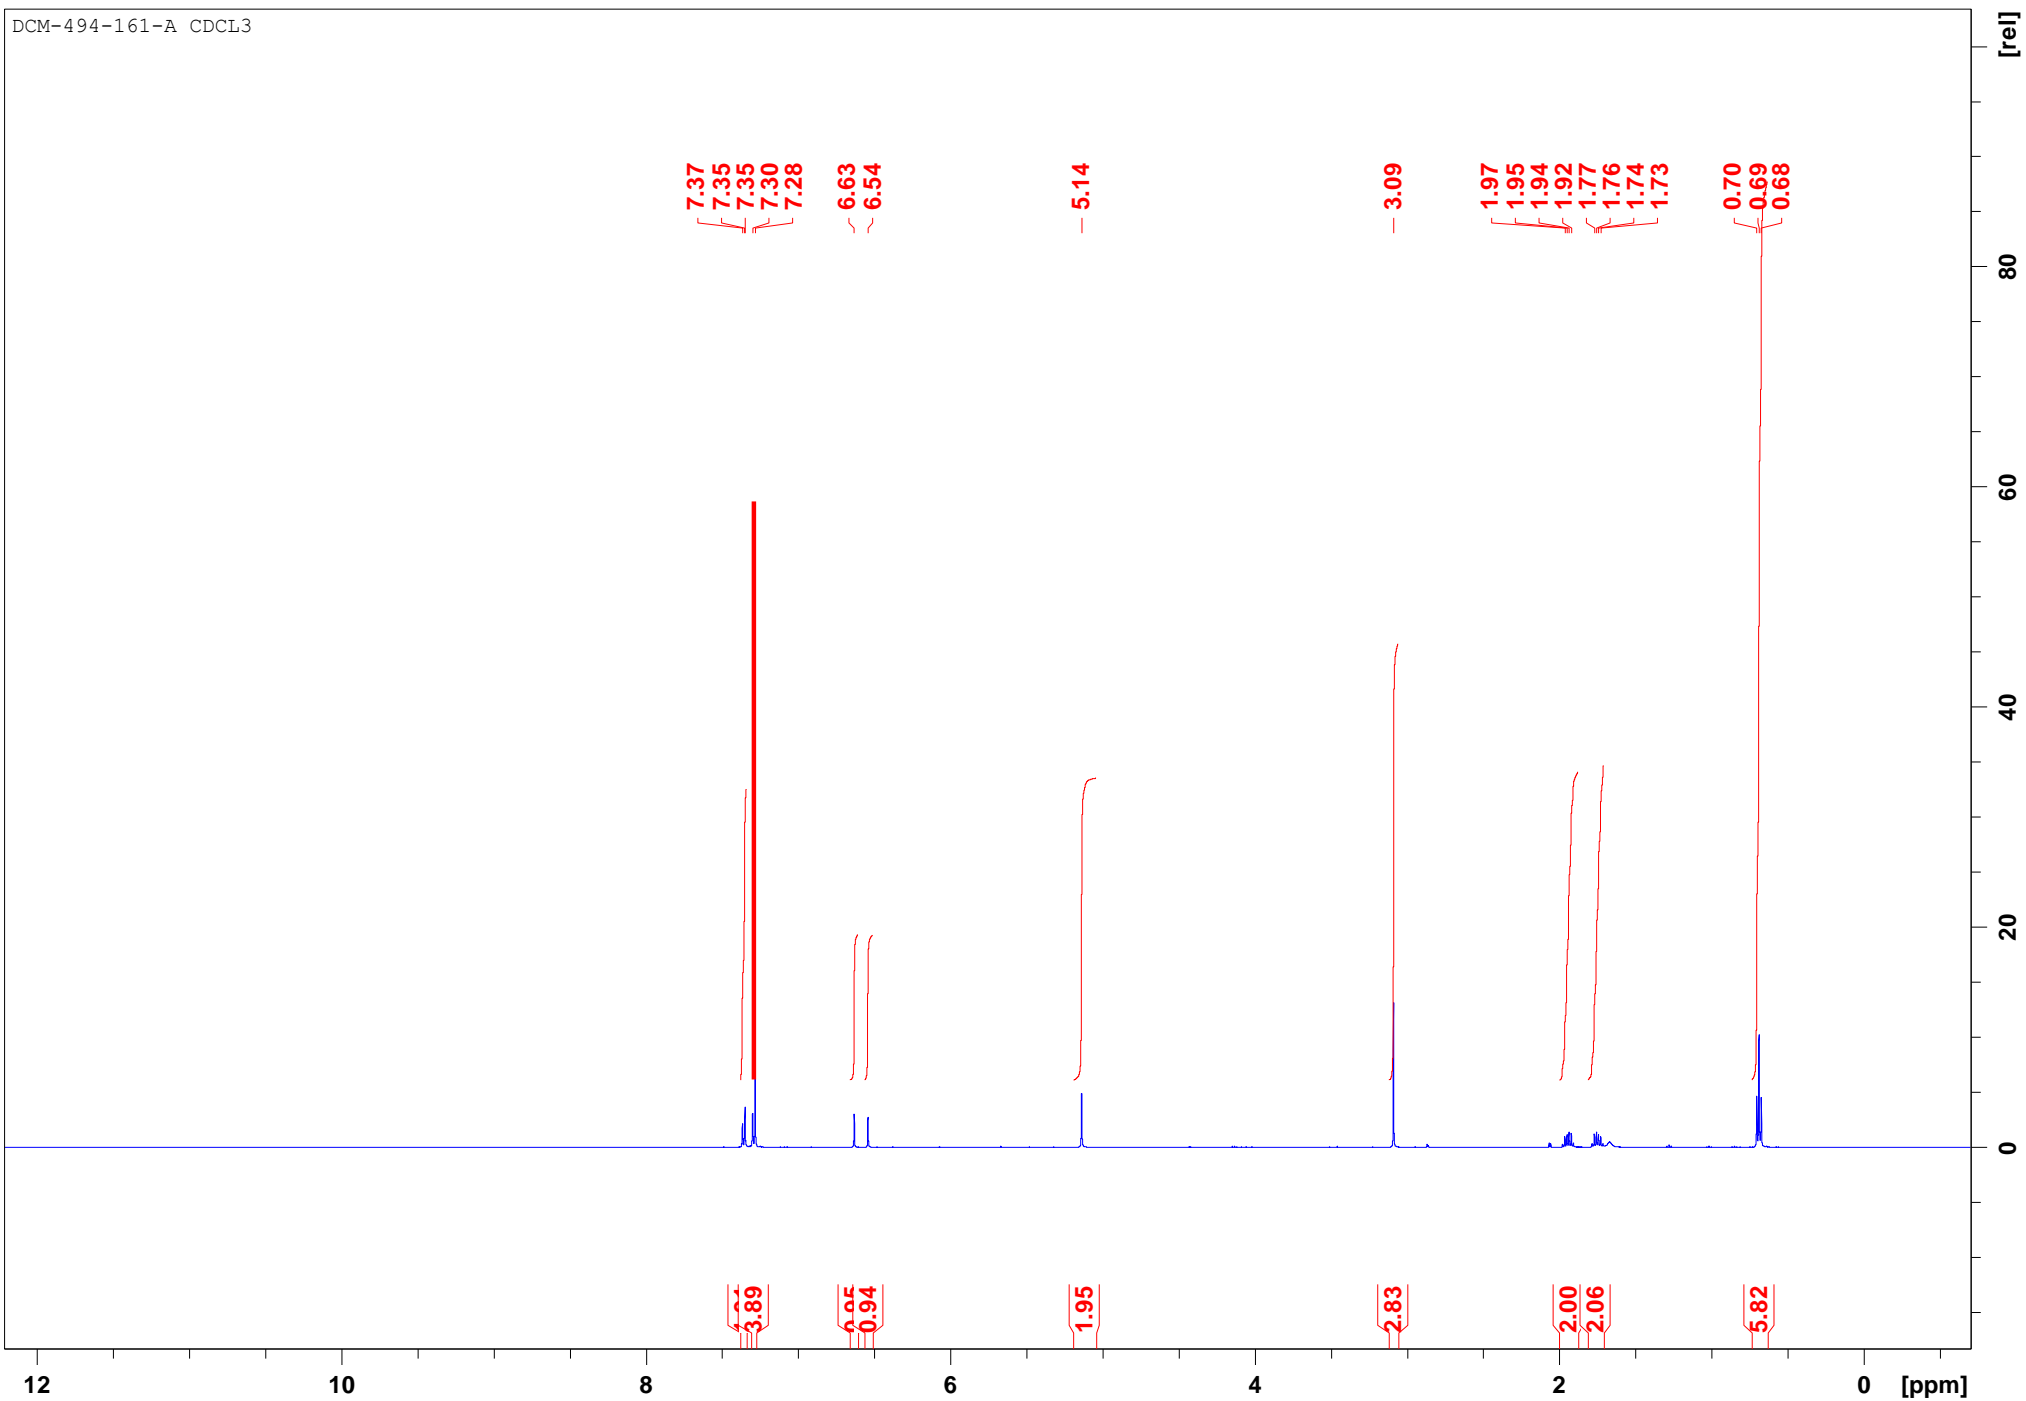



18a

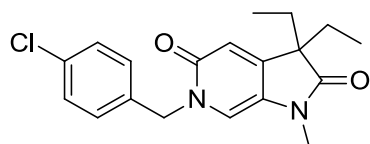

"dcm-494-161-a cdcl3" 13 1 "X:\Old Server\DCM\nmr"

DCM-494-161-A CDCL3

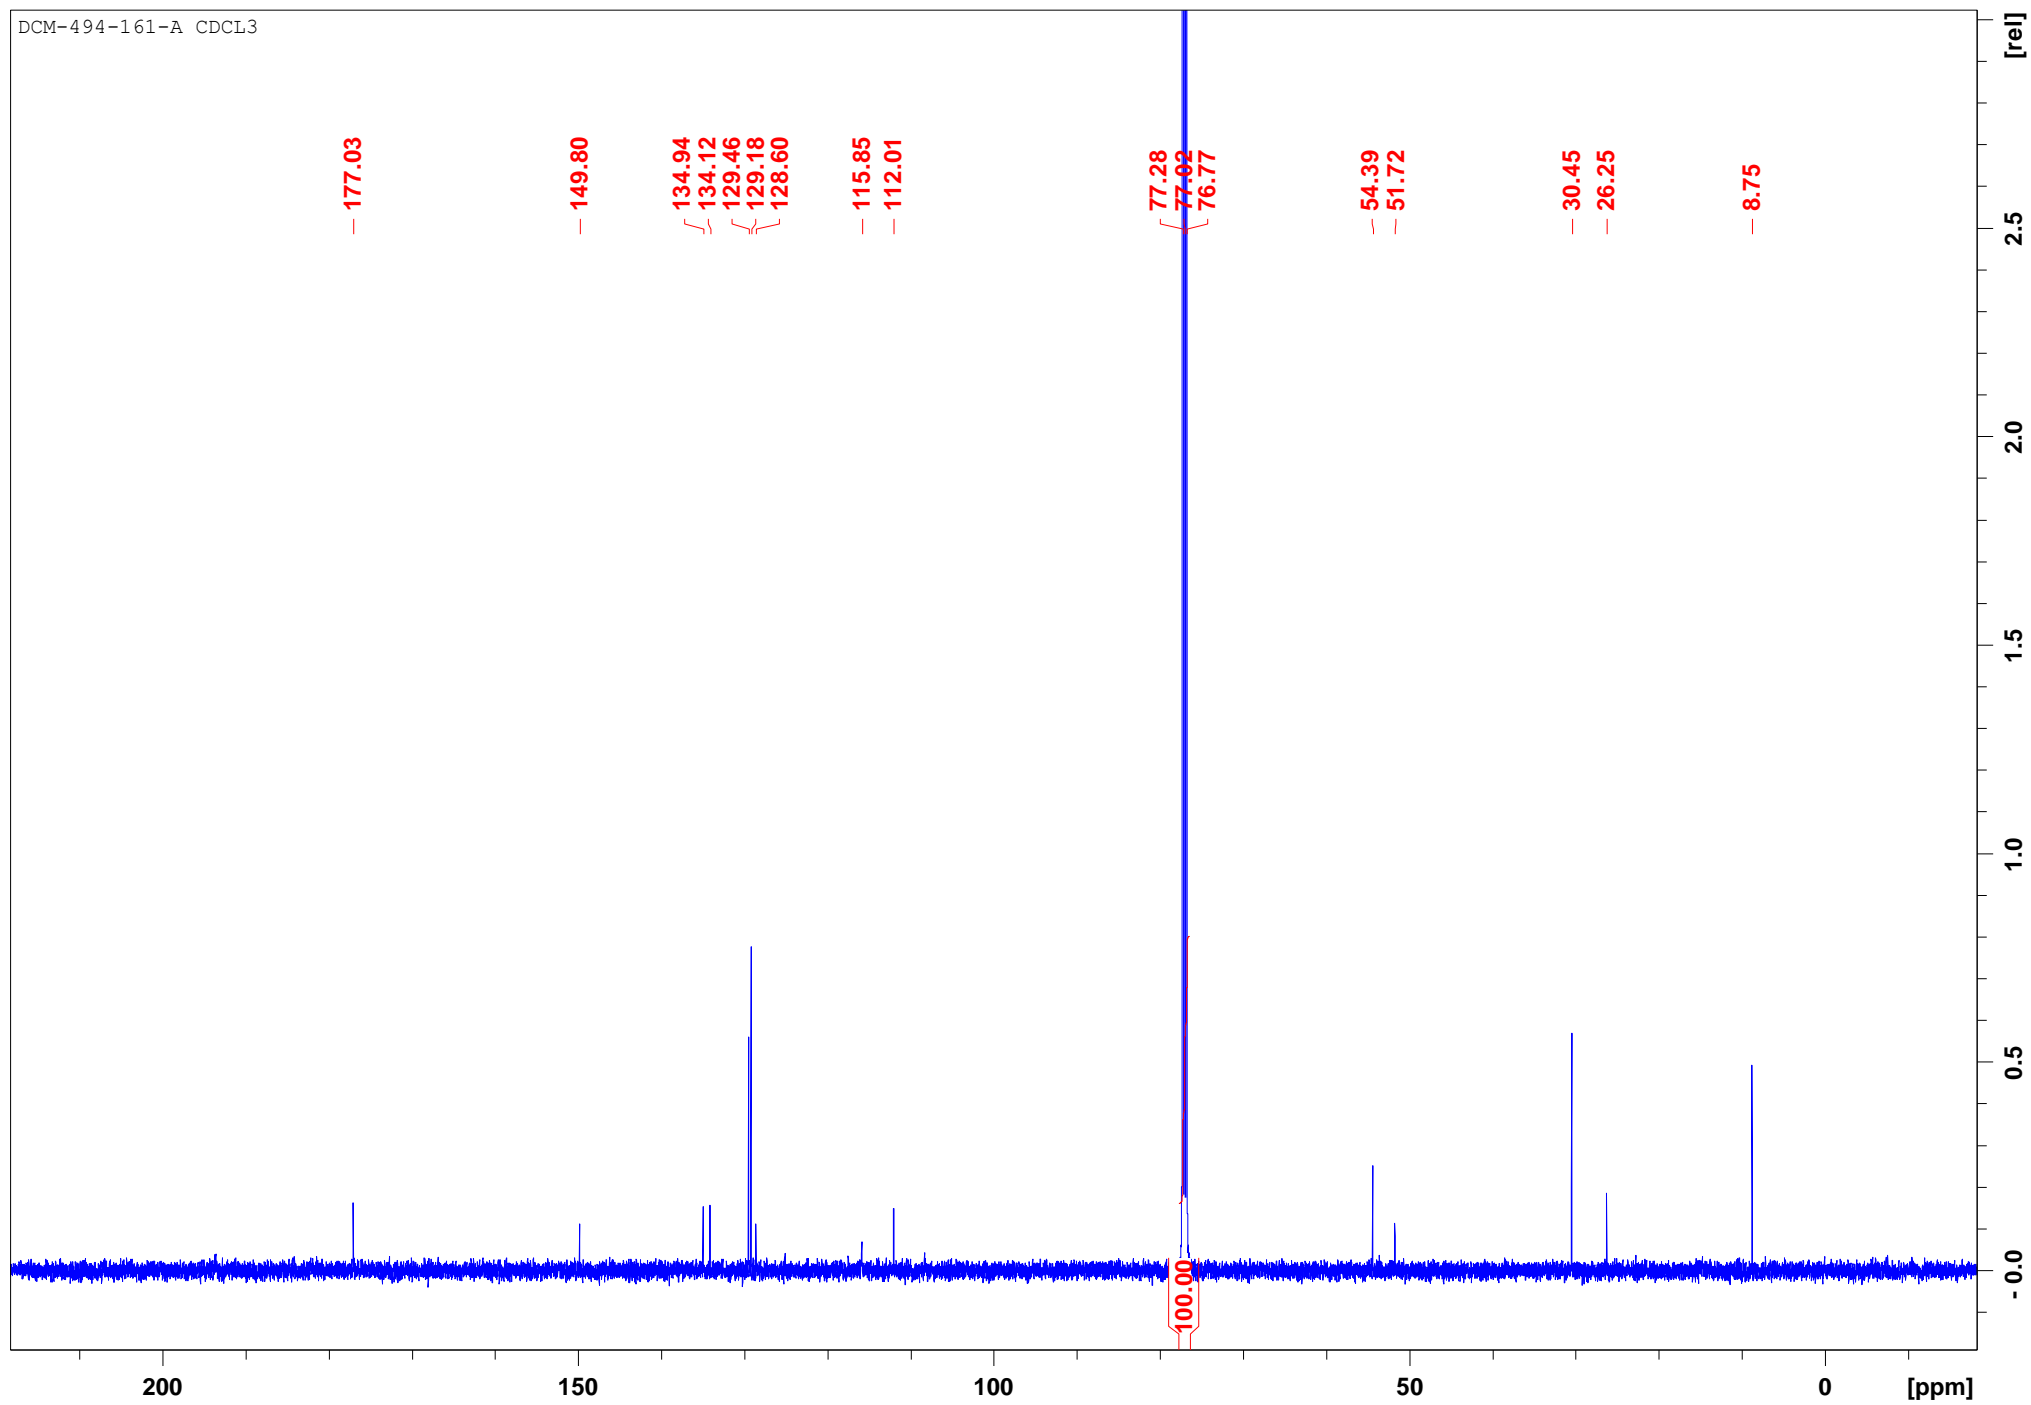

18b

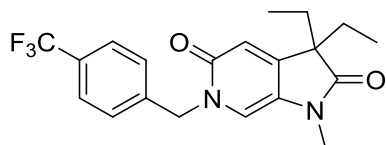

"DCM-494-183-A CDCL3" 10 1 Z:\data\DCM\nmr

DCM-494-183-A CDCL3

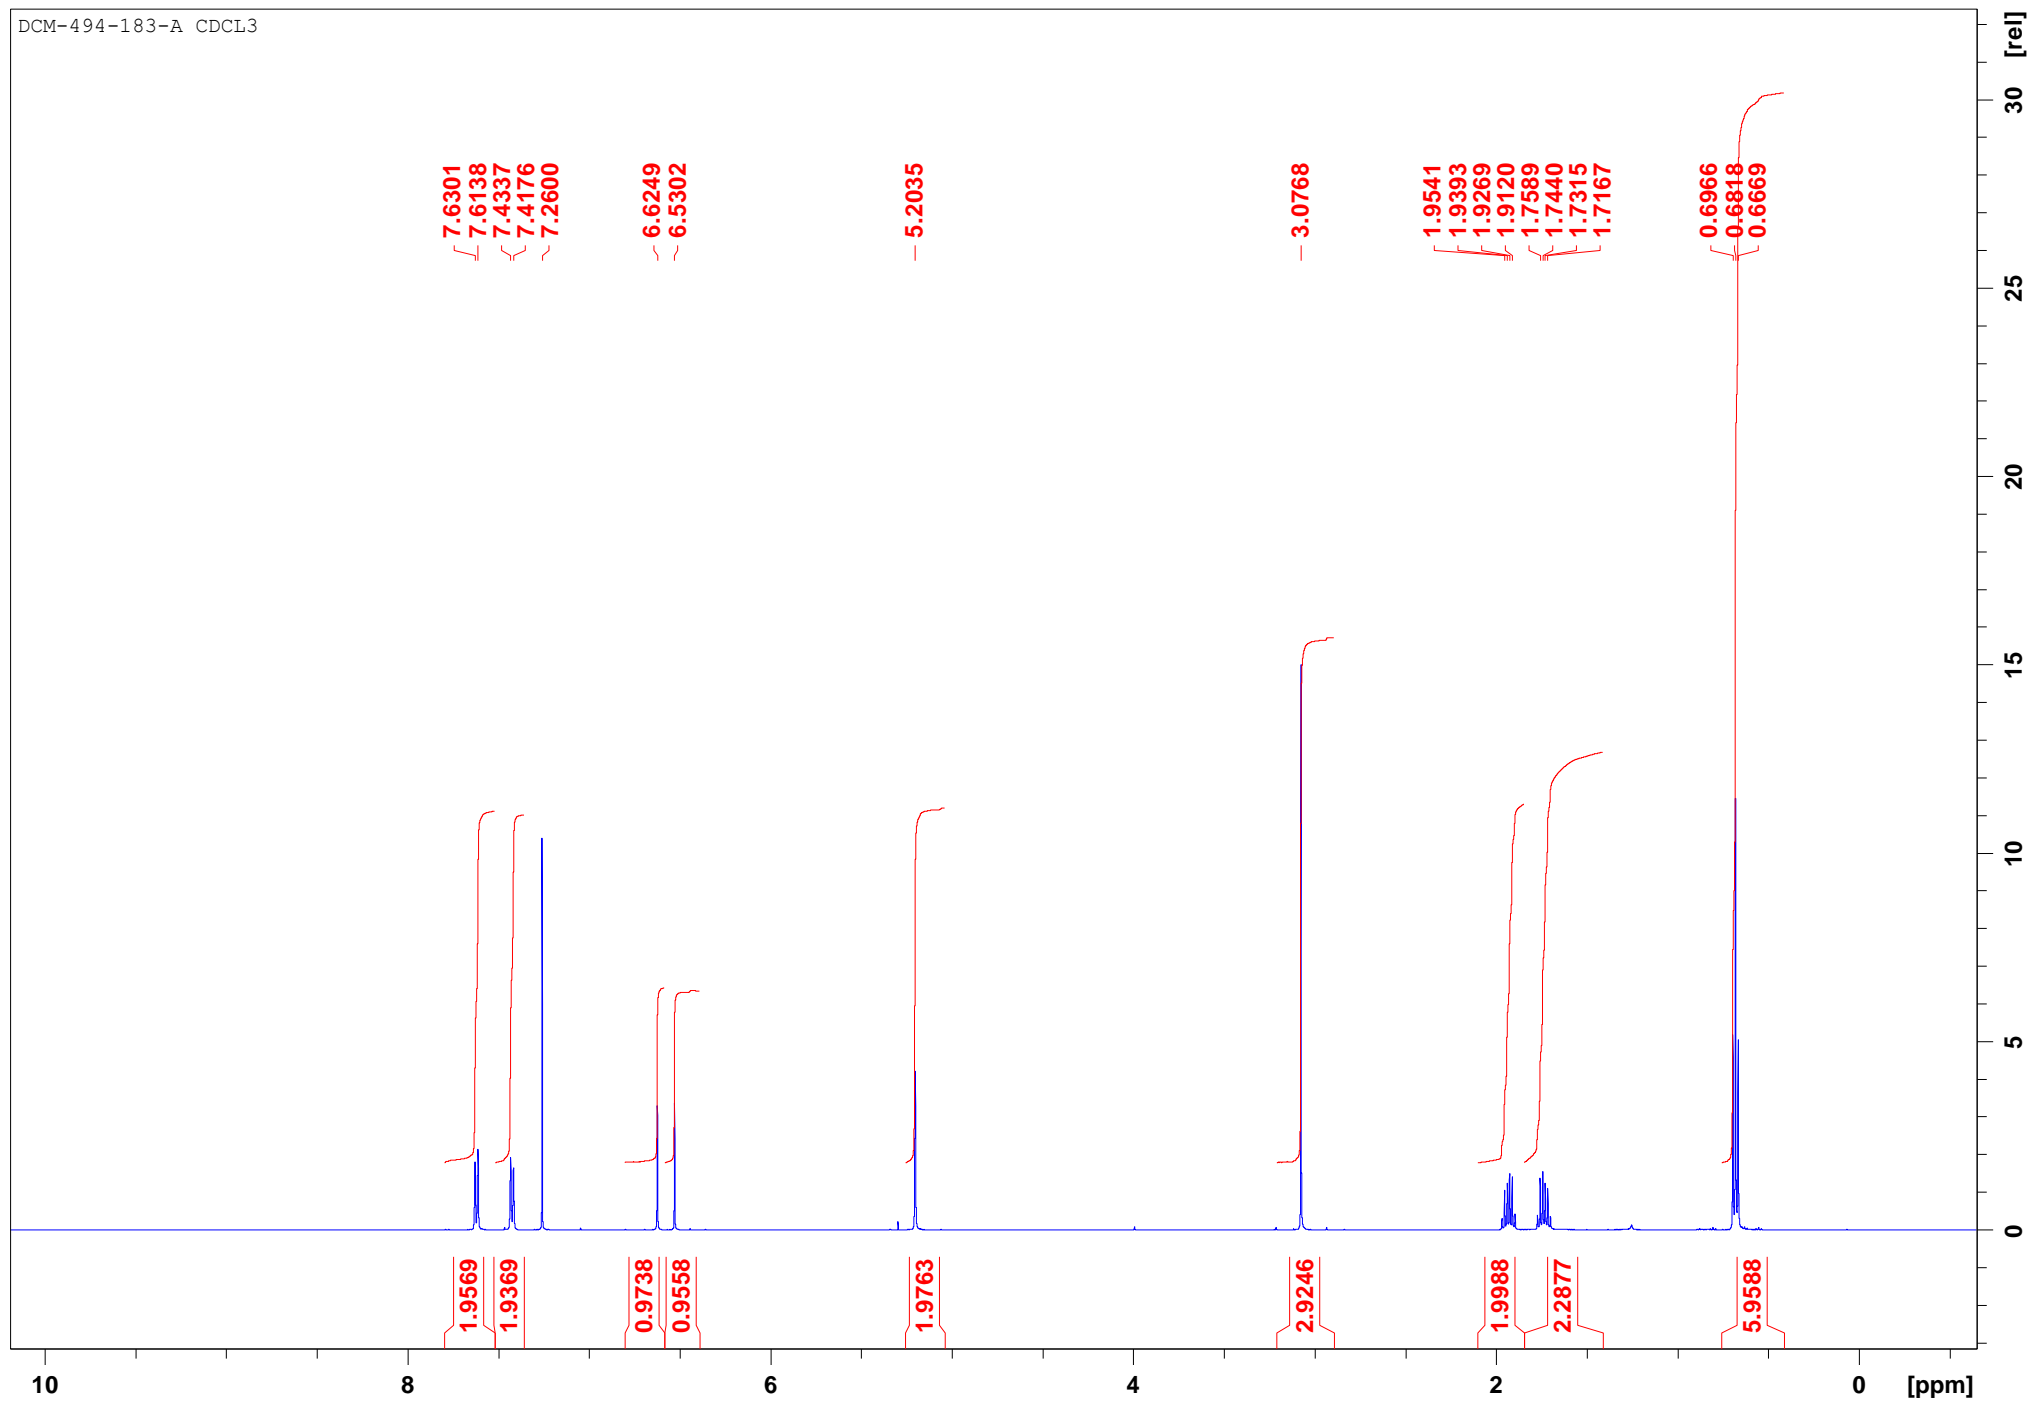

18b

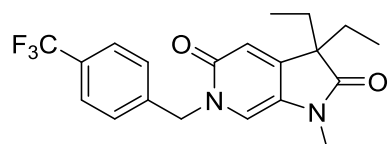

"DCM-494-183-A CDCL3" 11 1 Z:\data\DCM\nmr

DCM-494-183-A CDCL3

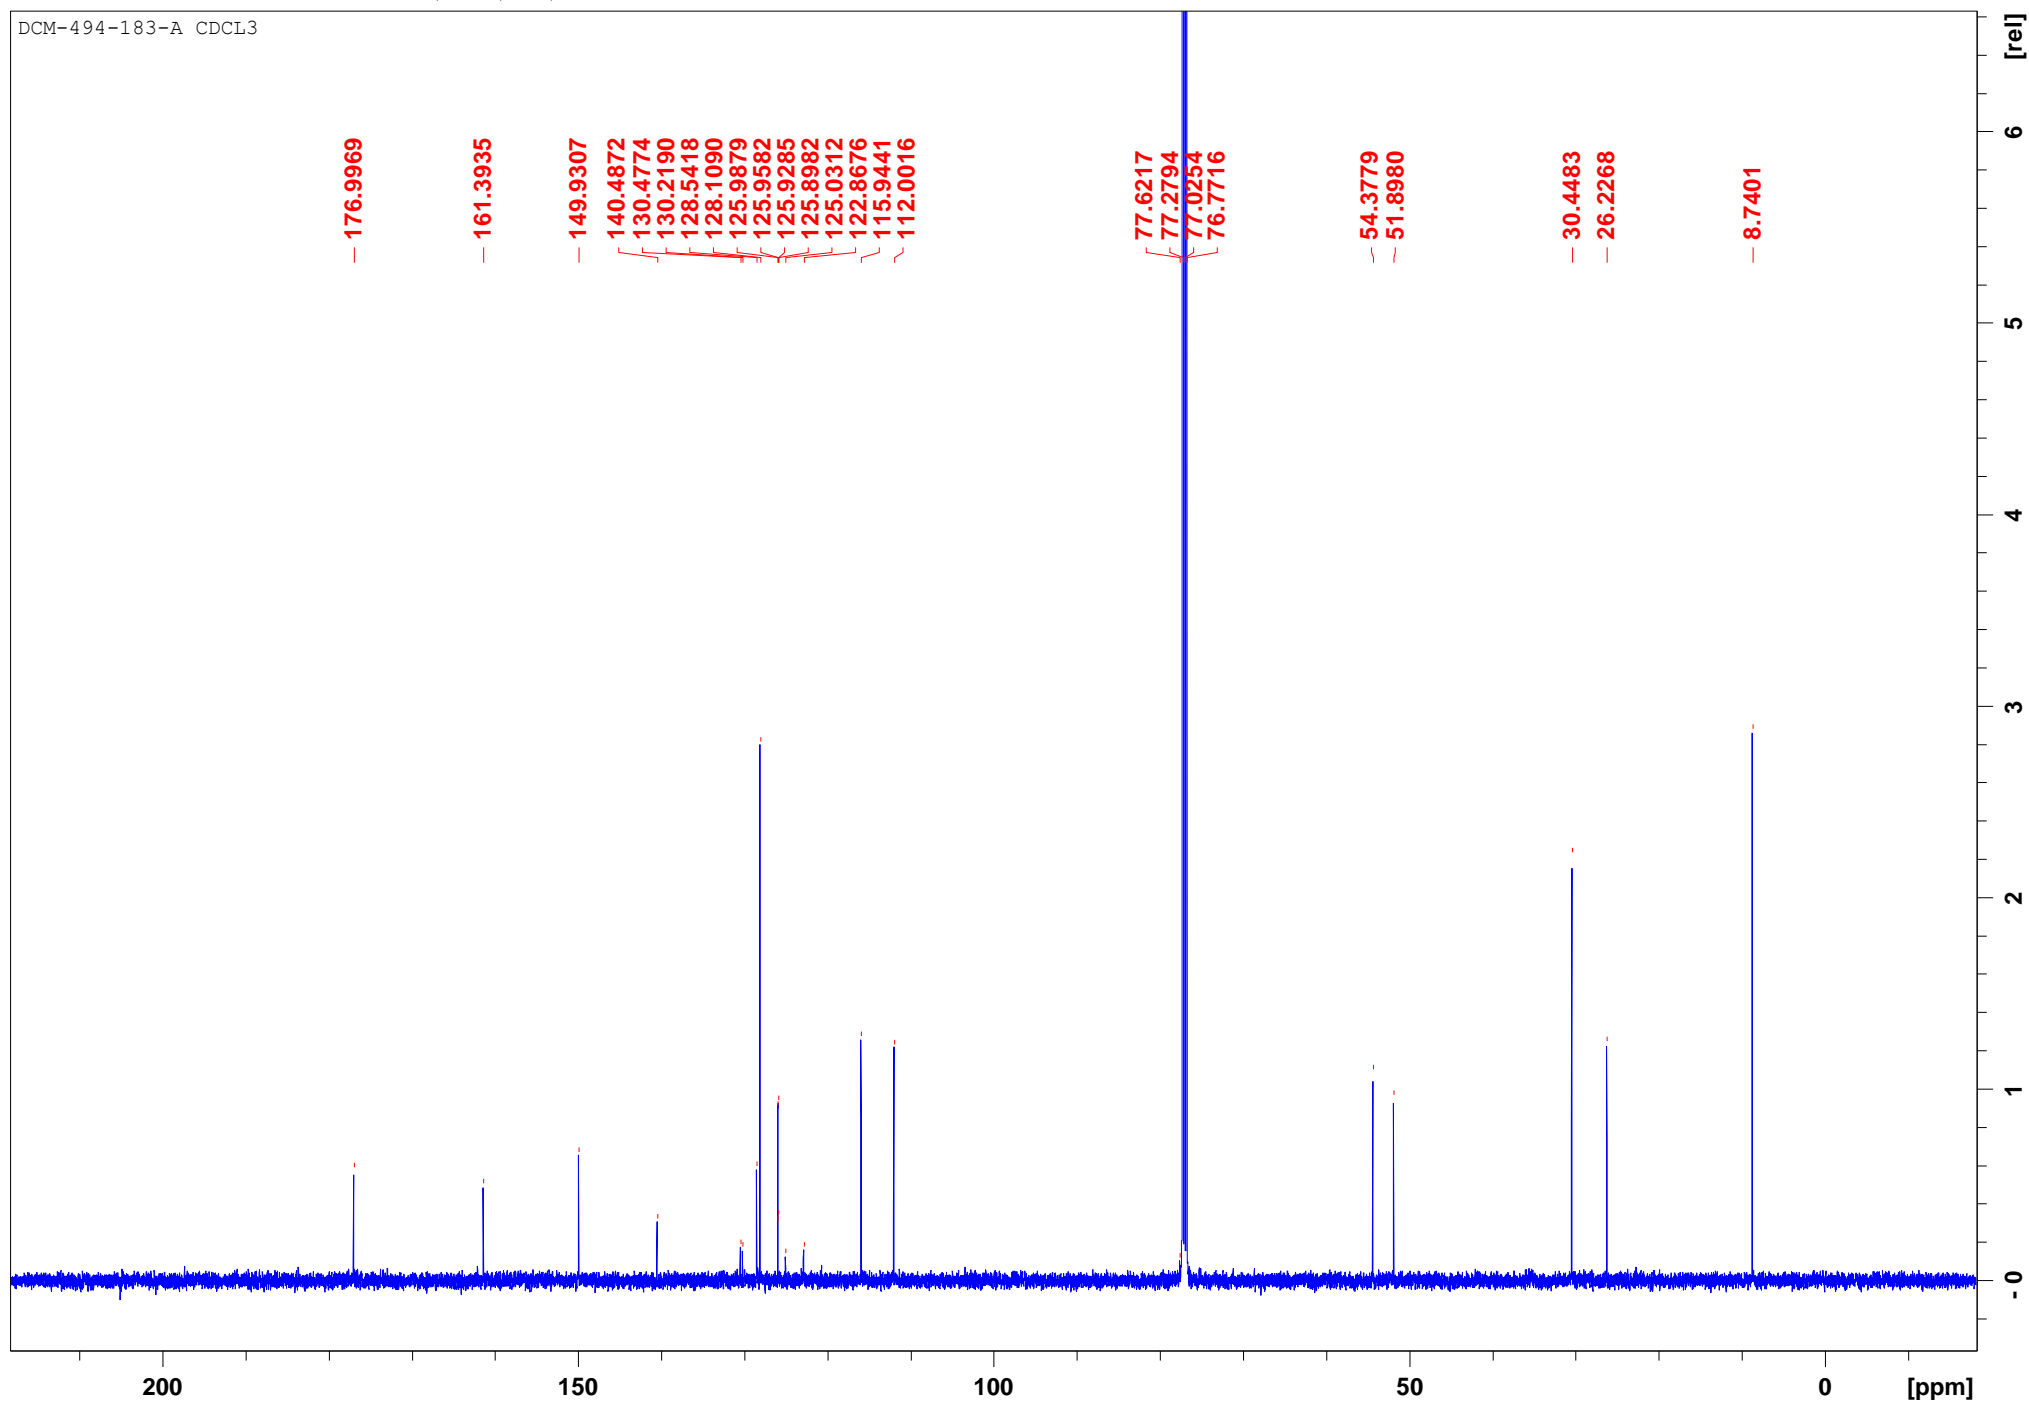

19a

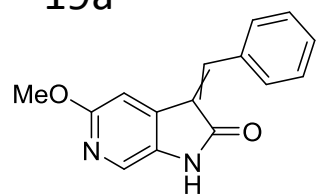

SA-500-90 10 1 "X:\Old Server\SA\nmr"

SA-500-90

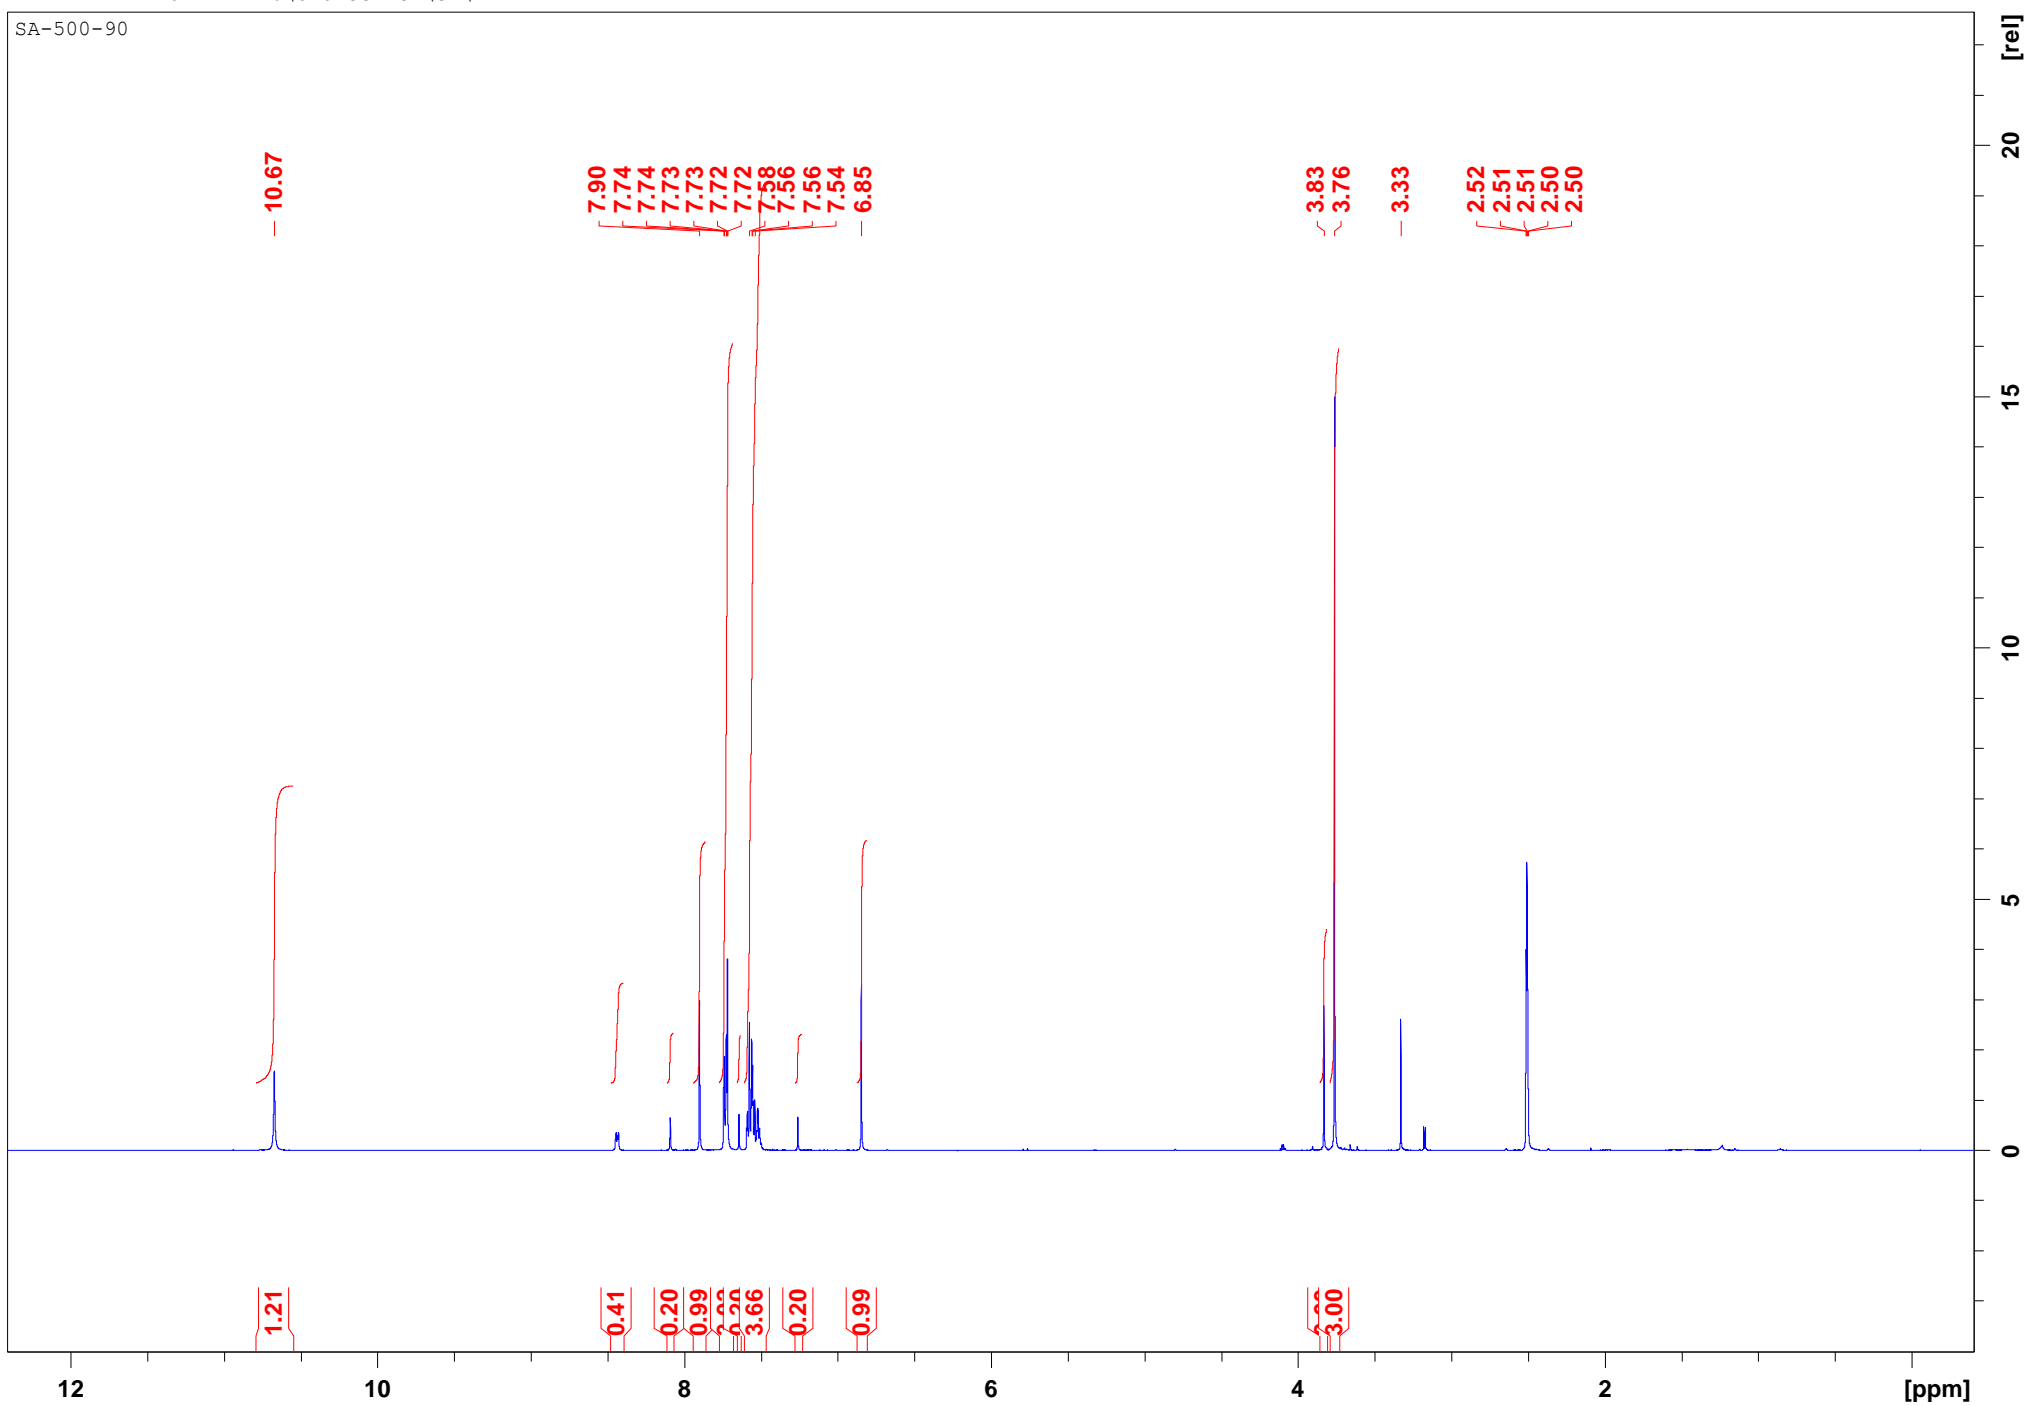

19a



SA-500-90 13 1 "X:\Old Server\SA\nmr"

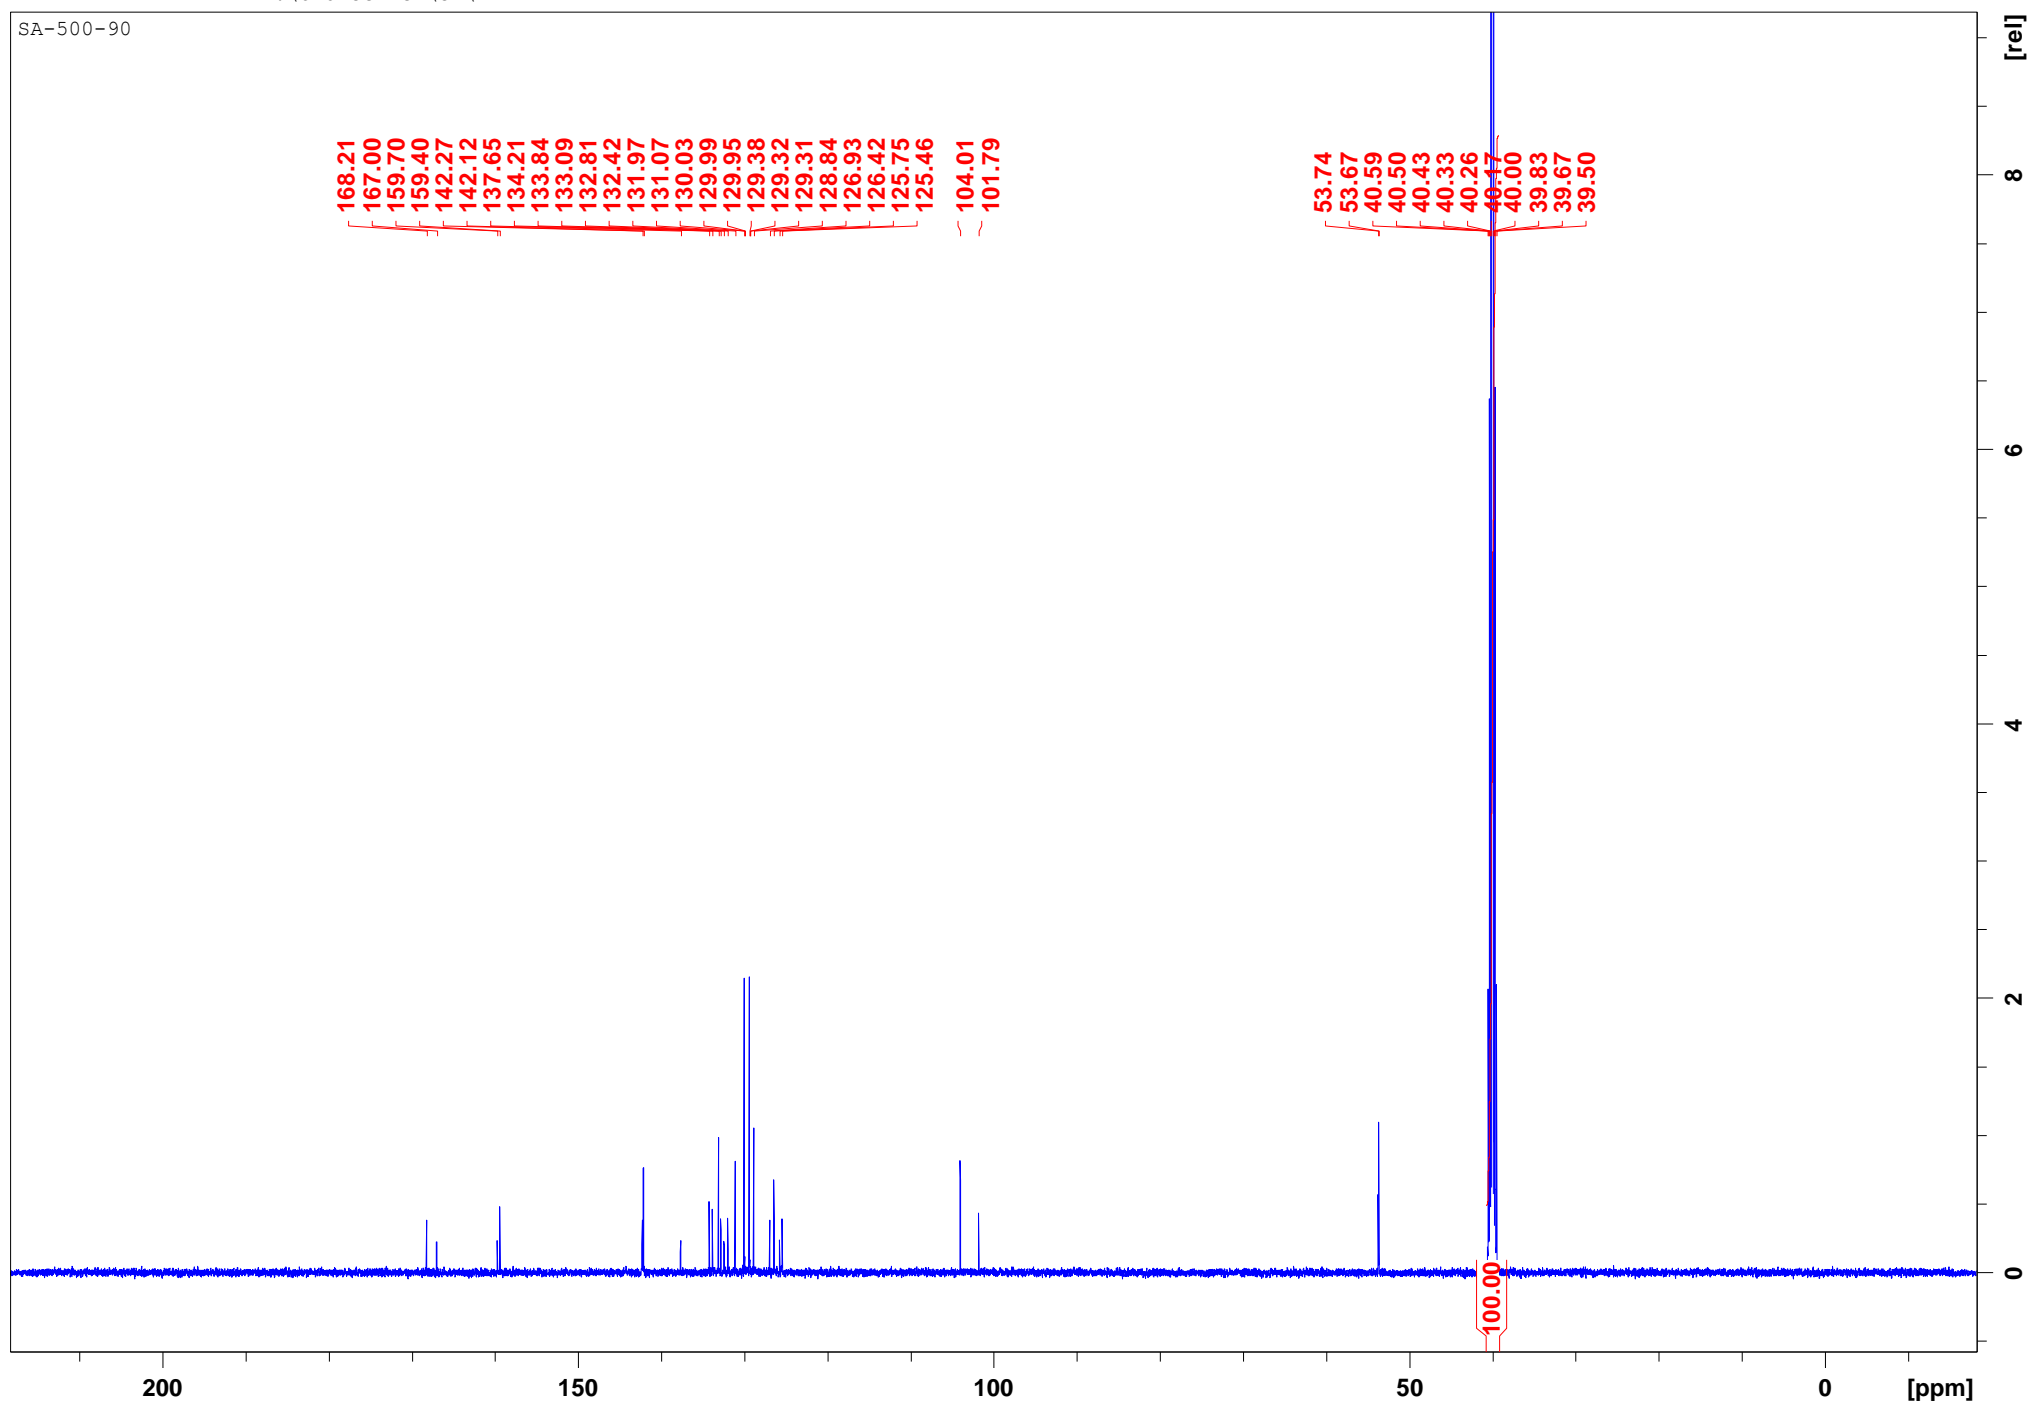

19b

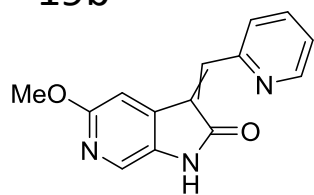

SA-500-114 10 1 "X:\Old Server\SA\nmr"

SA-500-114

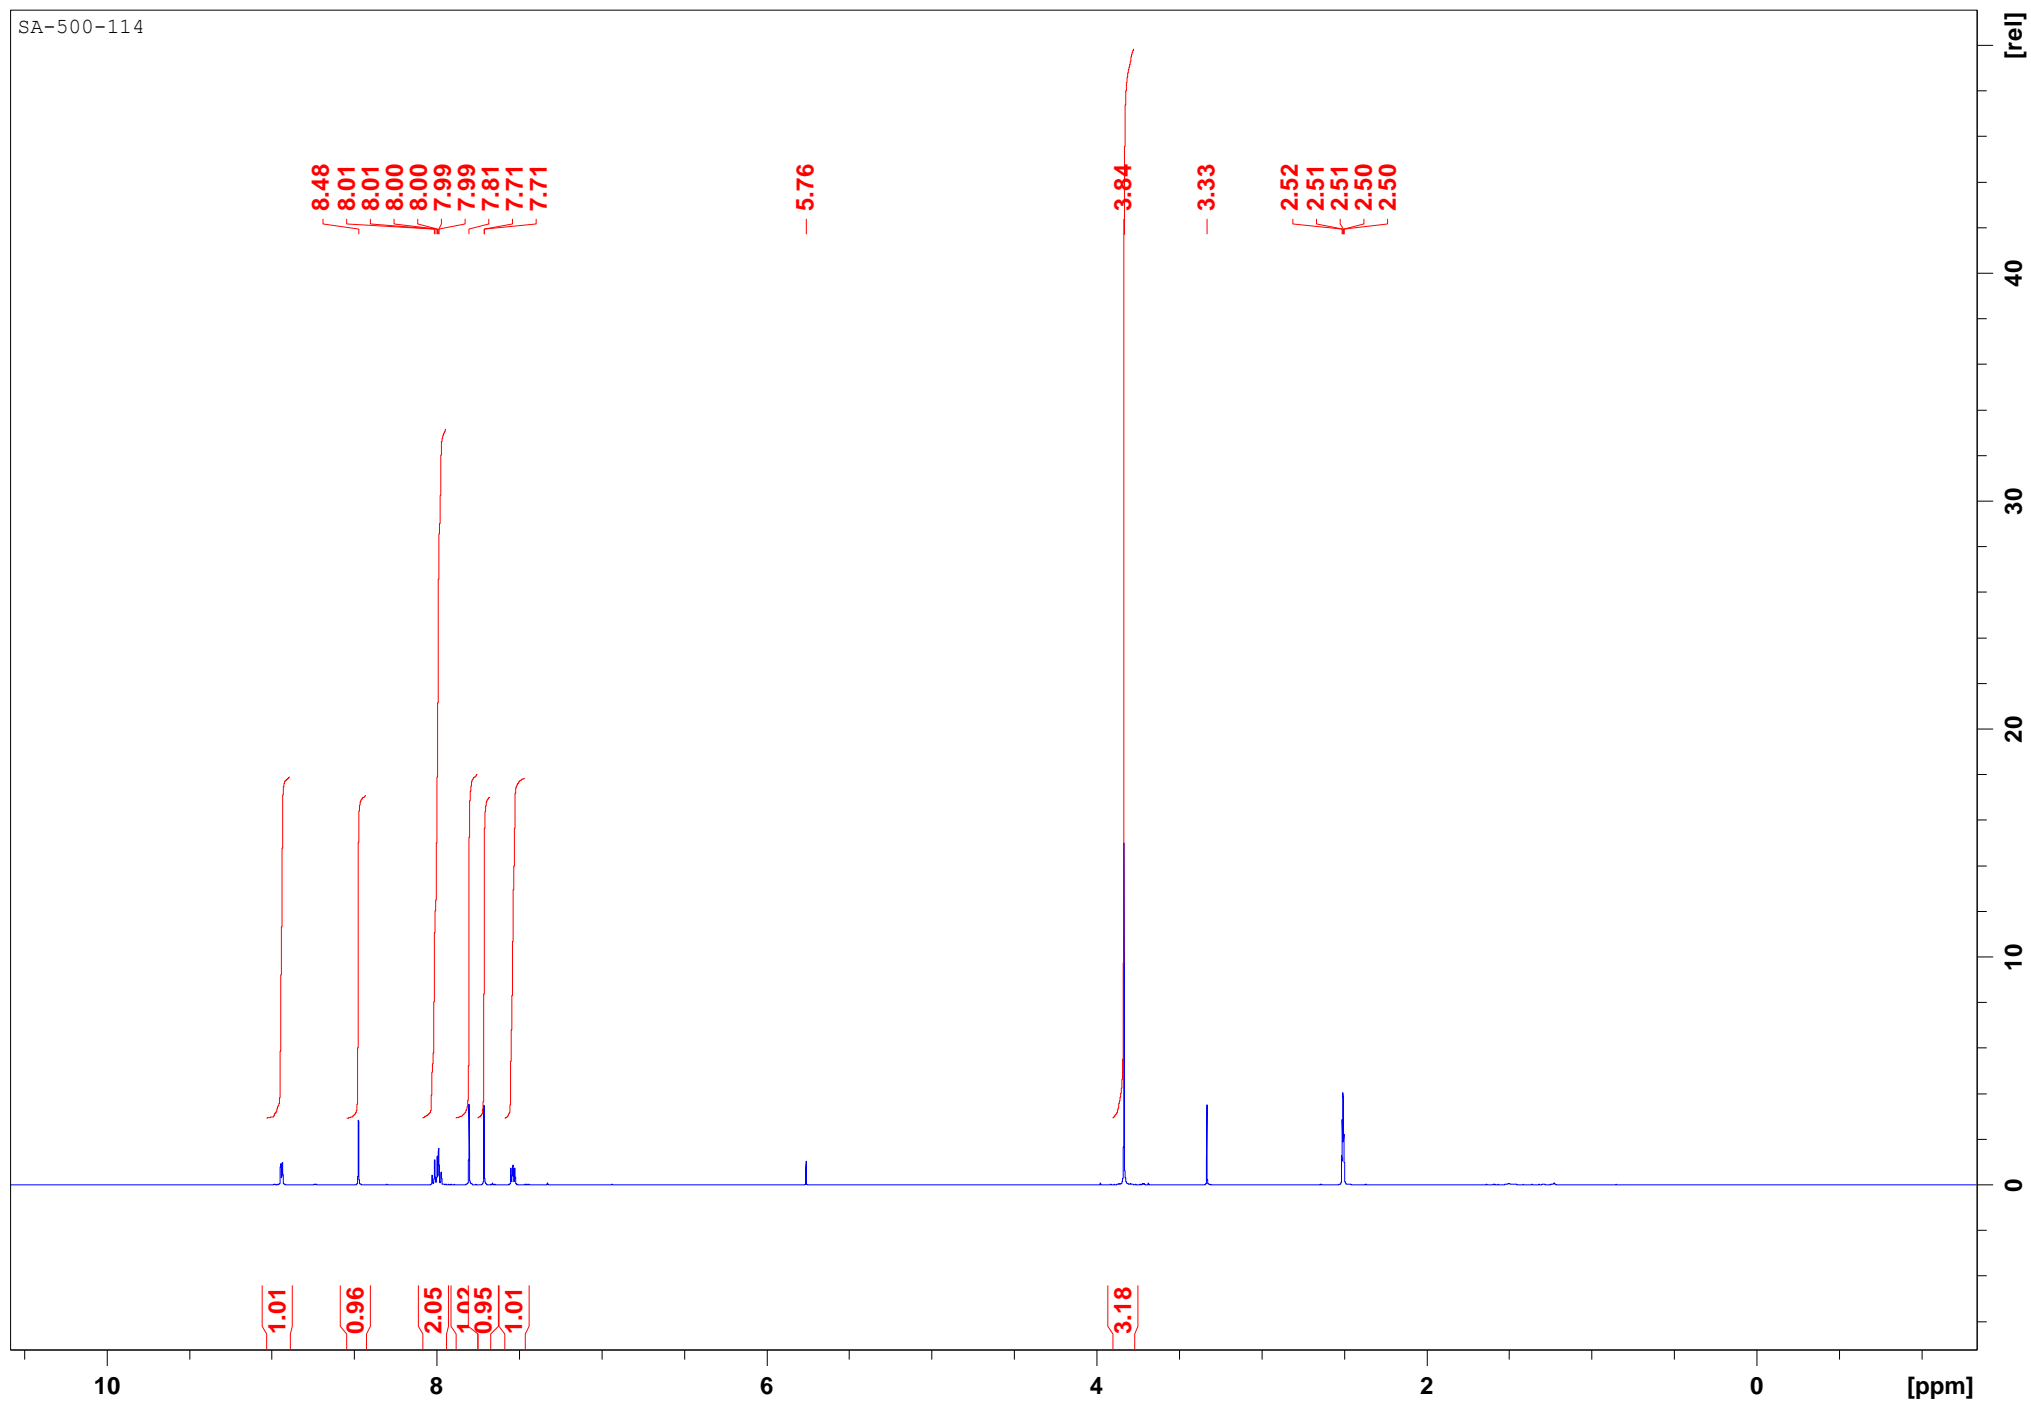

19b



SA-500-114 11 1 "X:\Old Server\SA\nmr"

SA-500-114

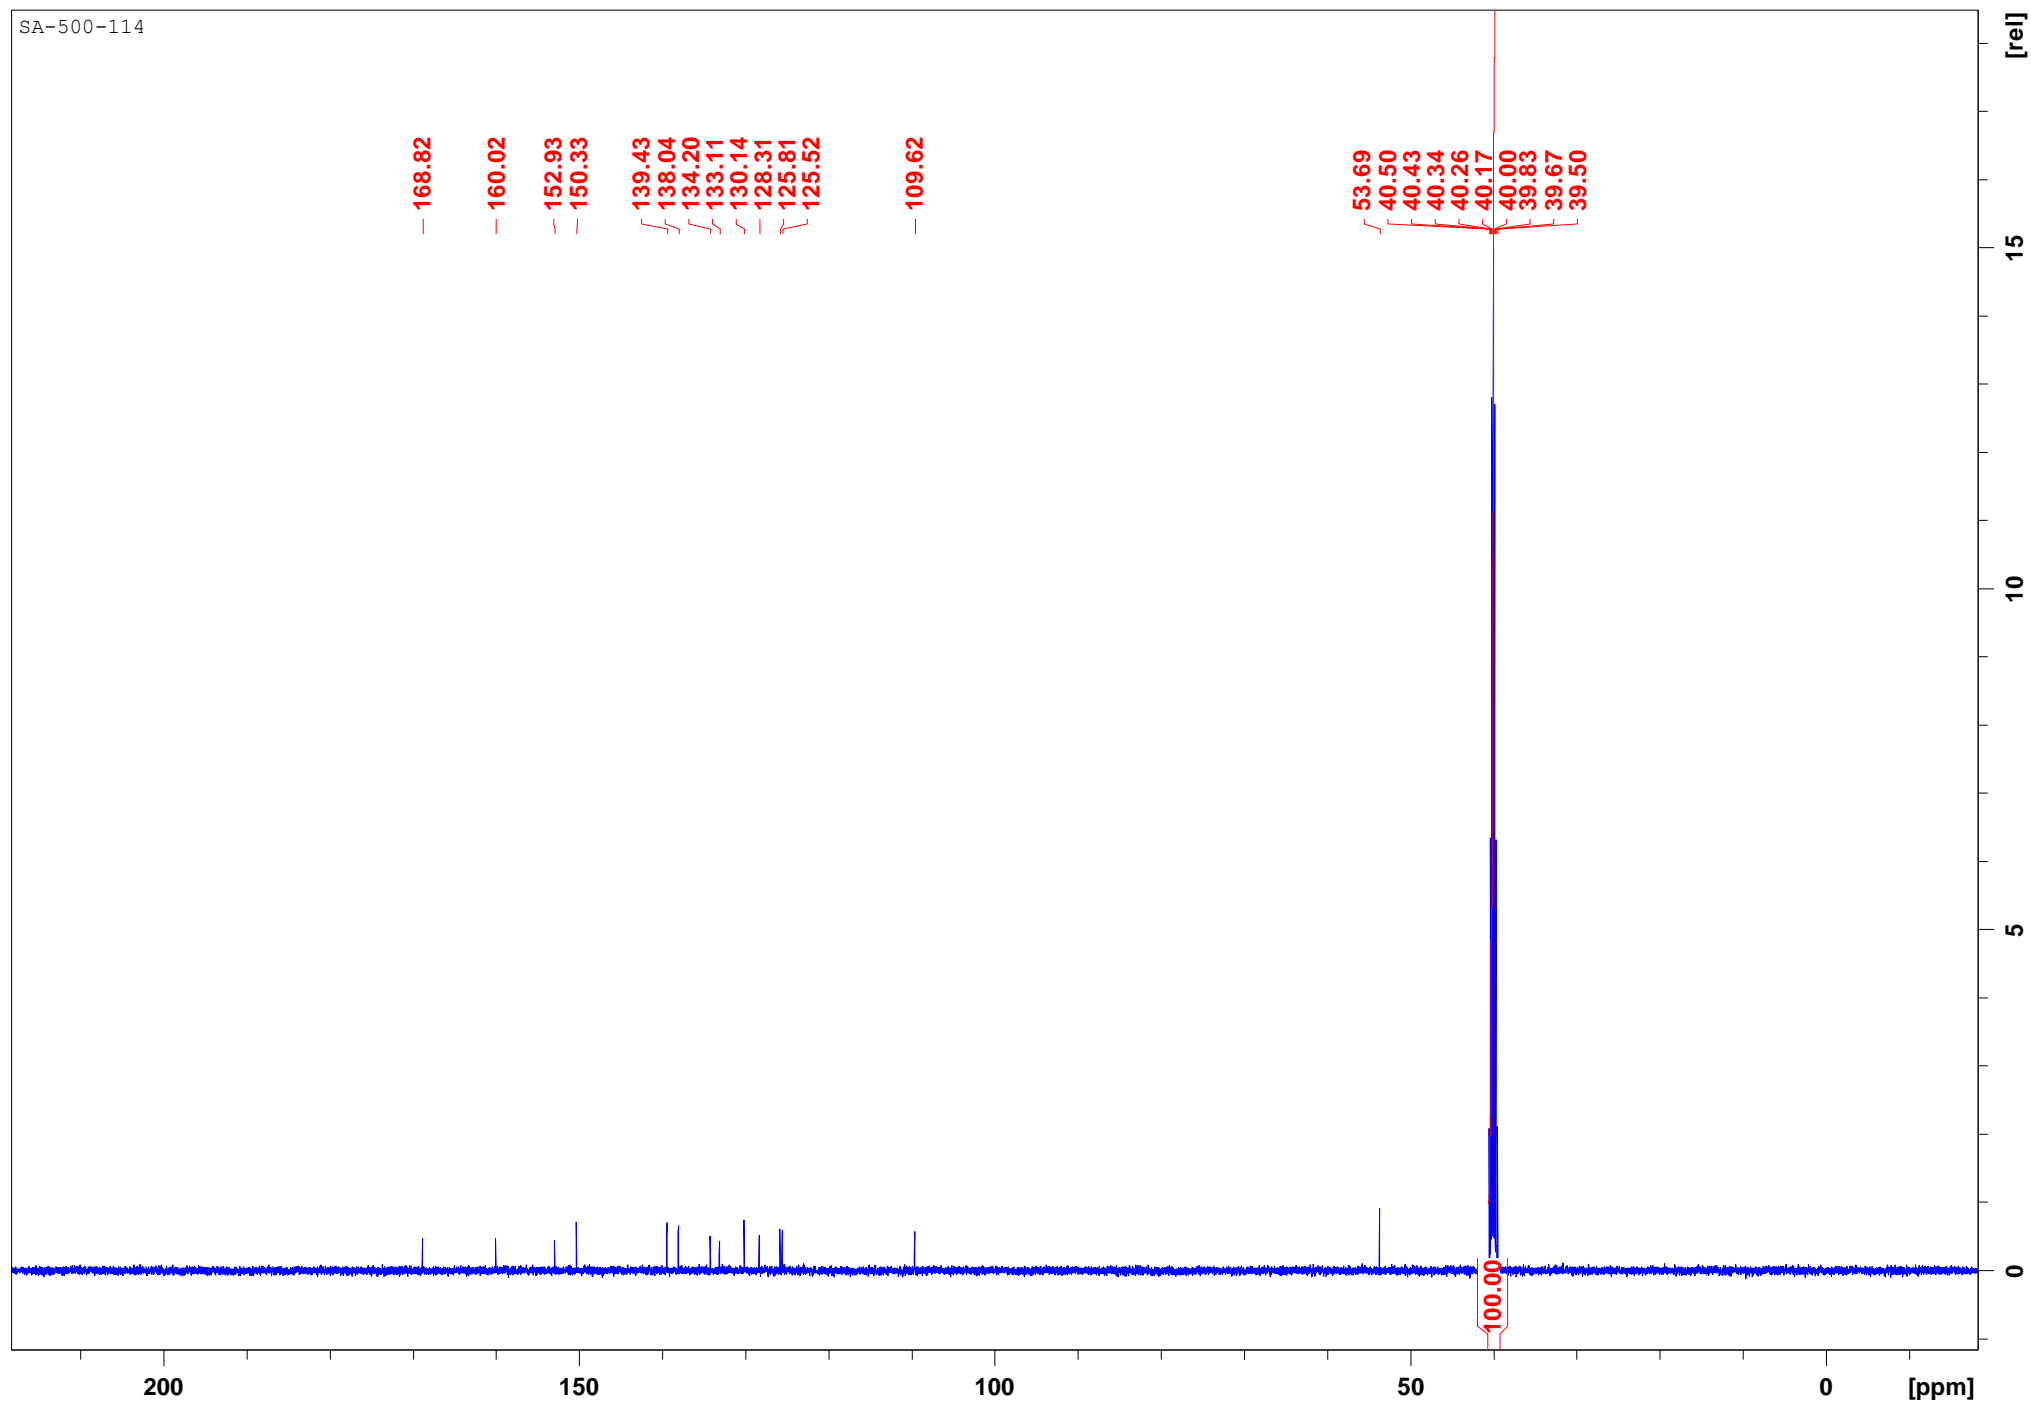

19c

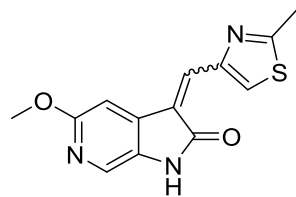

SH-493-232A 10 1 "X:\Old Server\SH\nmr"

SH-493-232A

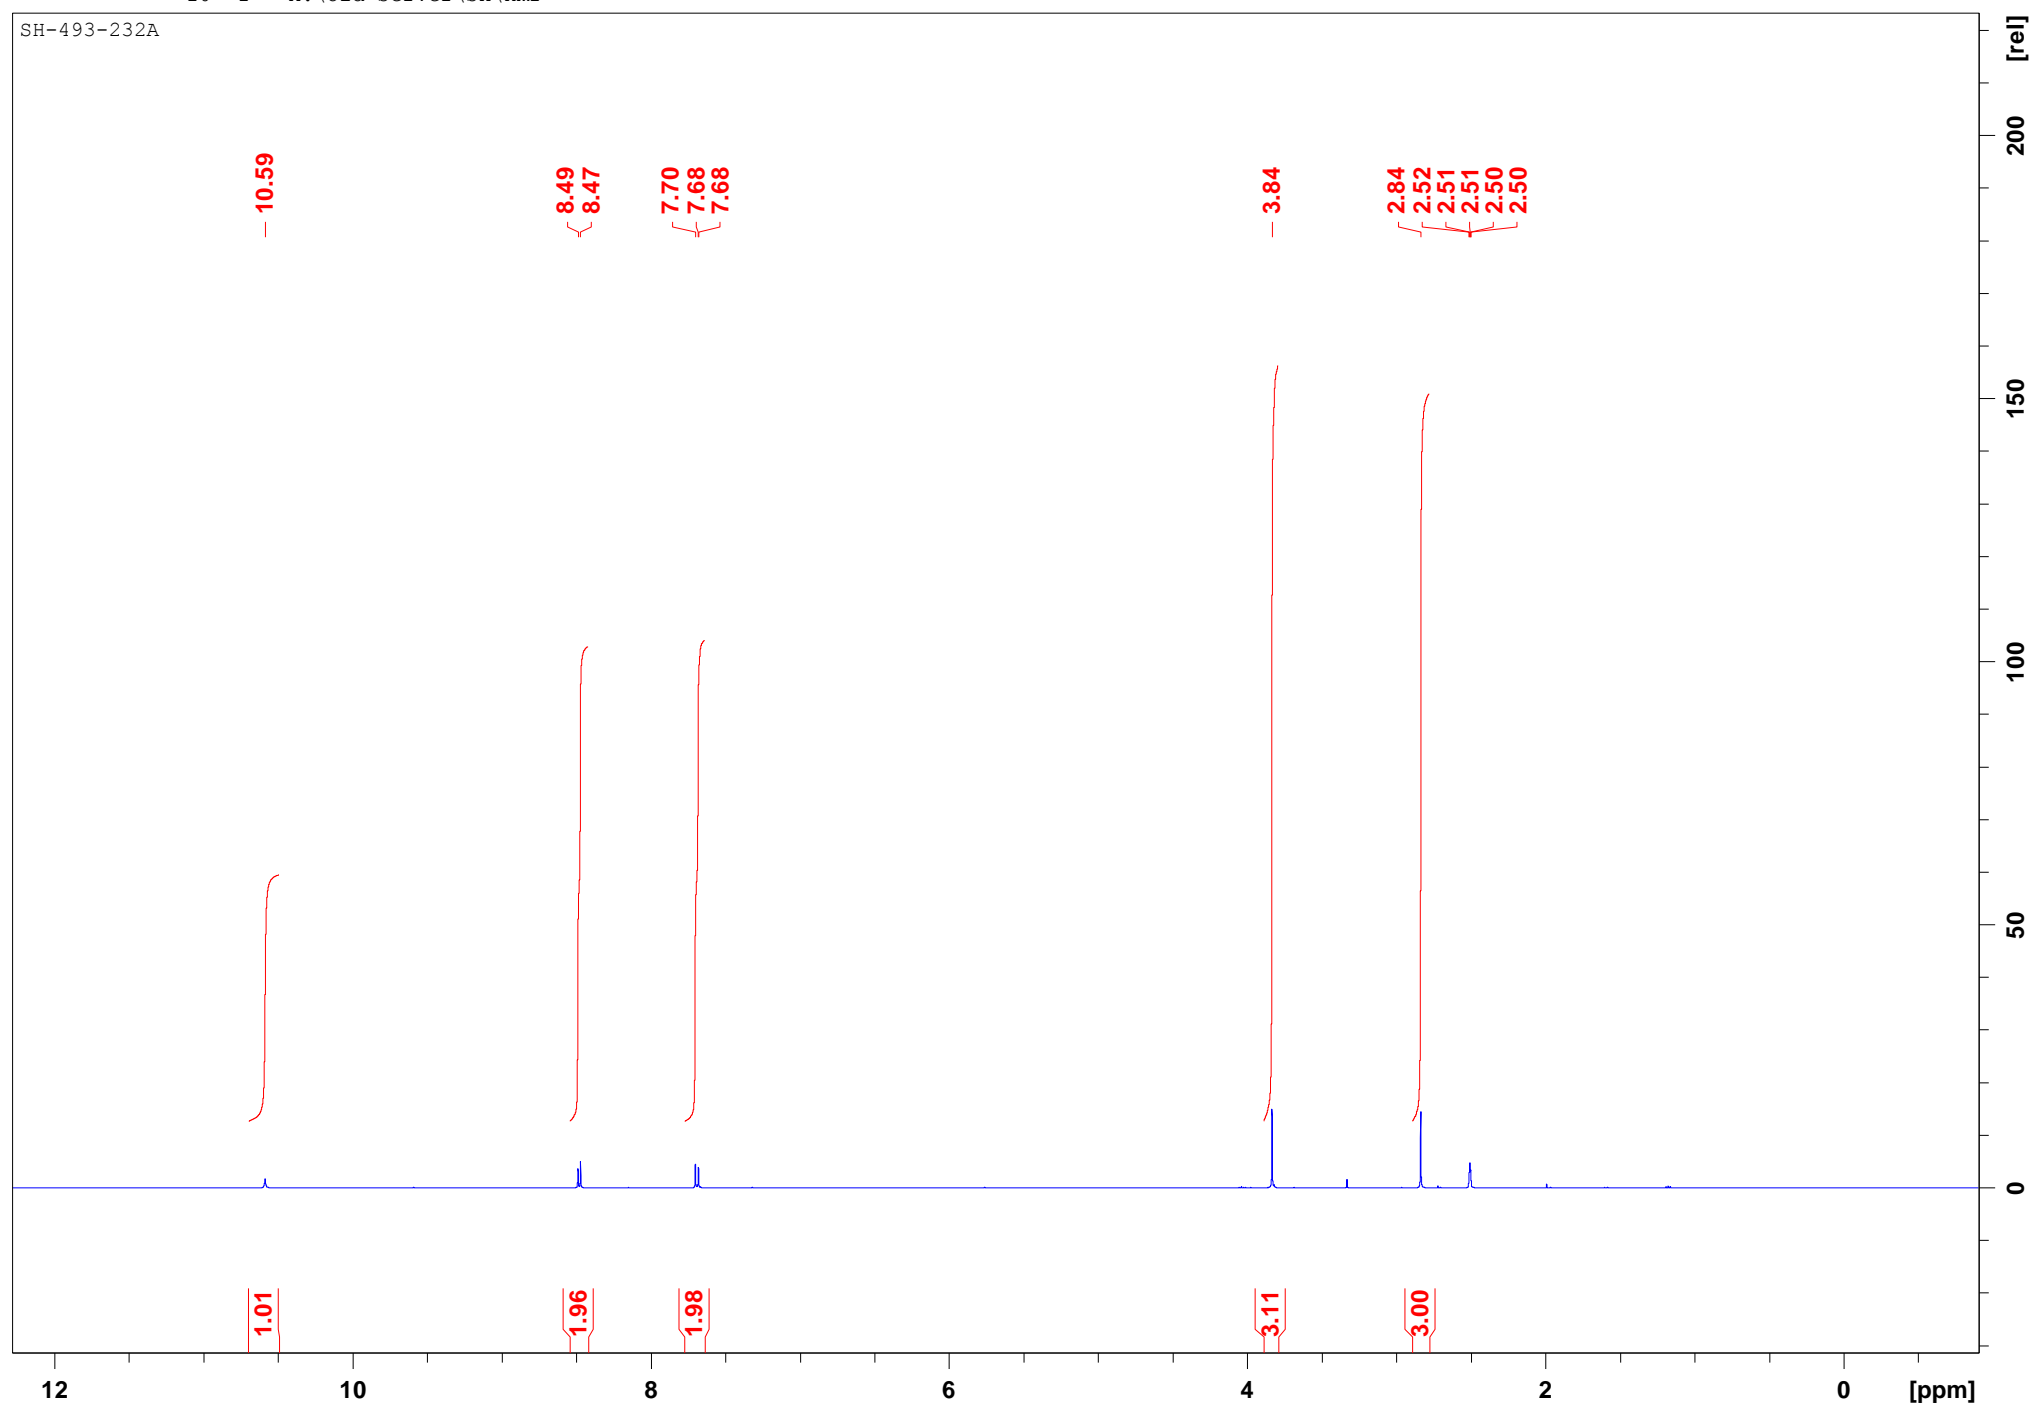



19c

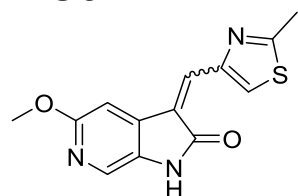

SH-493-232A 11 1 "X:\Old Server\SH\nmr"

SH-493-232A

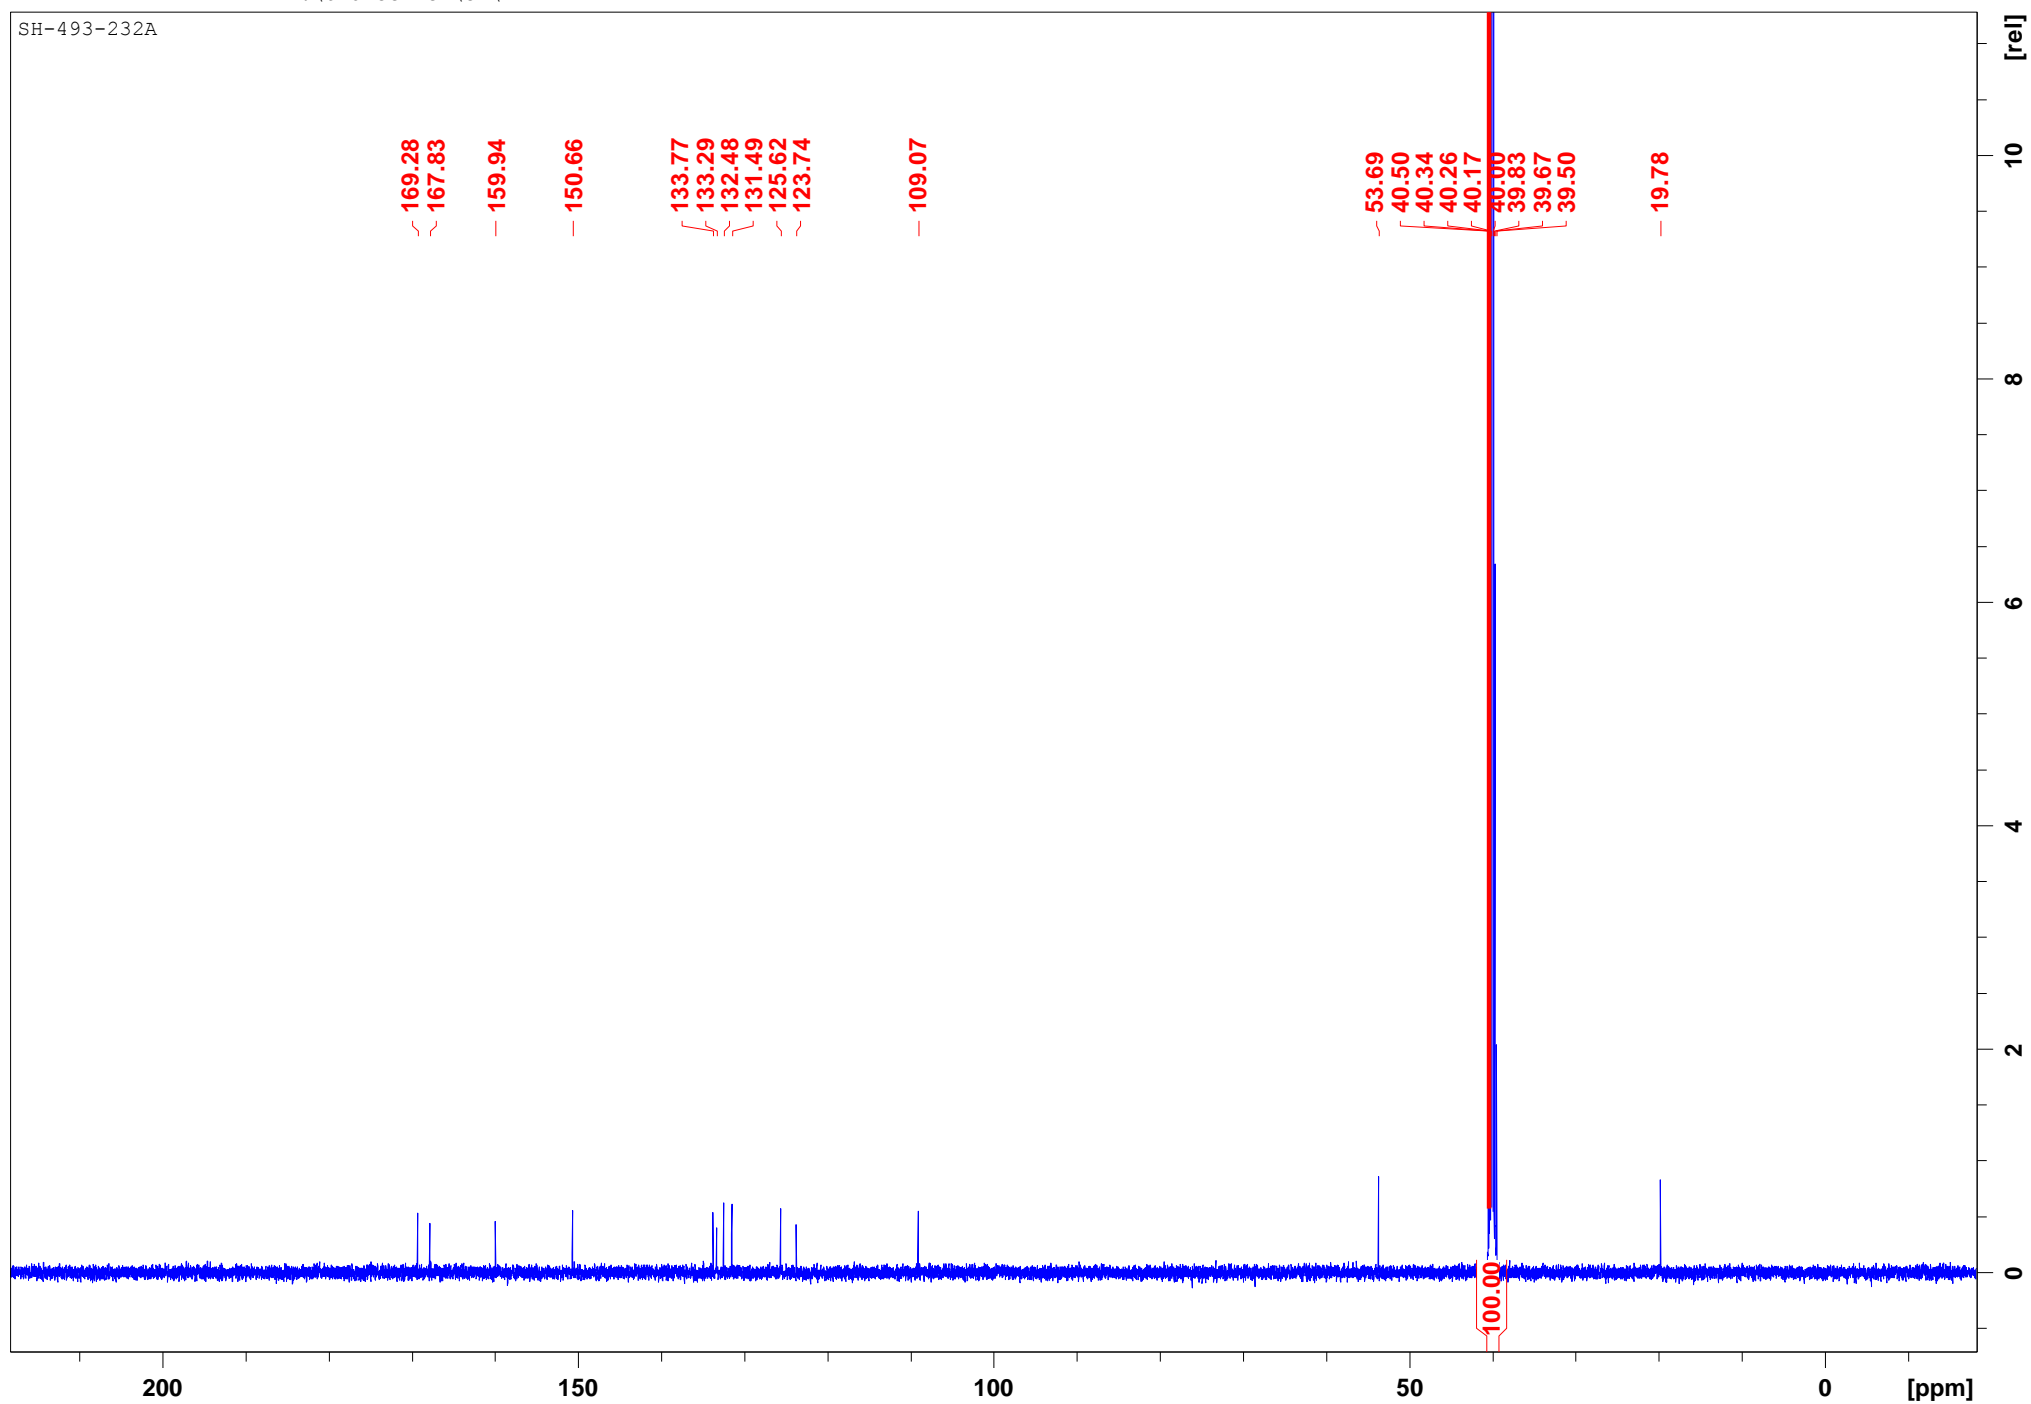

19d

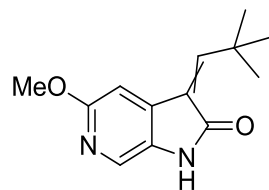

"DCM-494-225-A CDCL3" 10 1 X:\data\DCM\nmr

DCM-494-225-A CDCL3

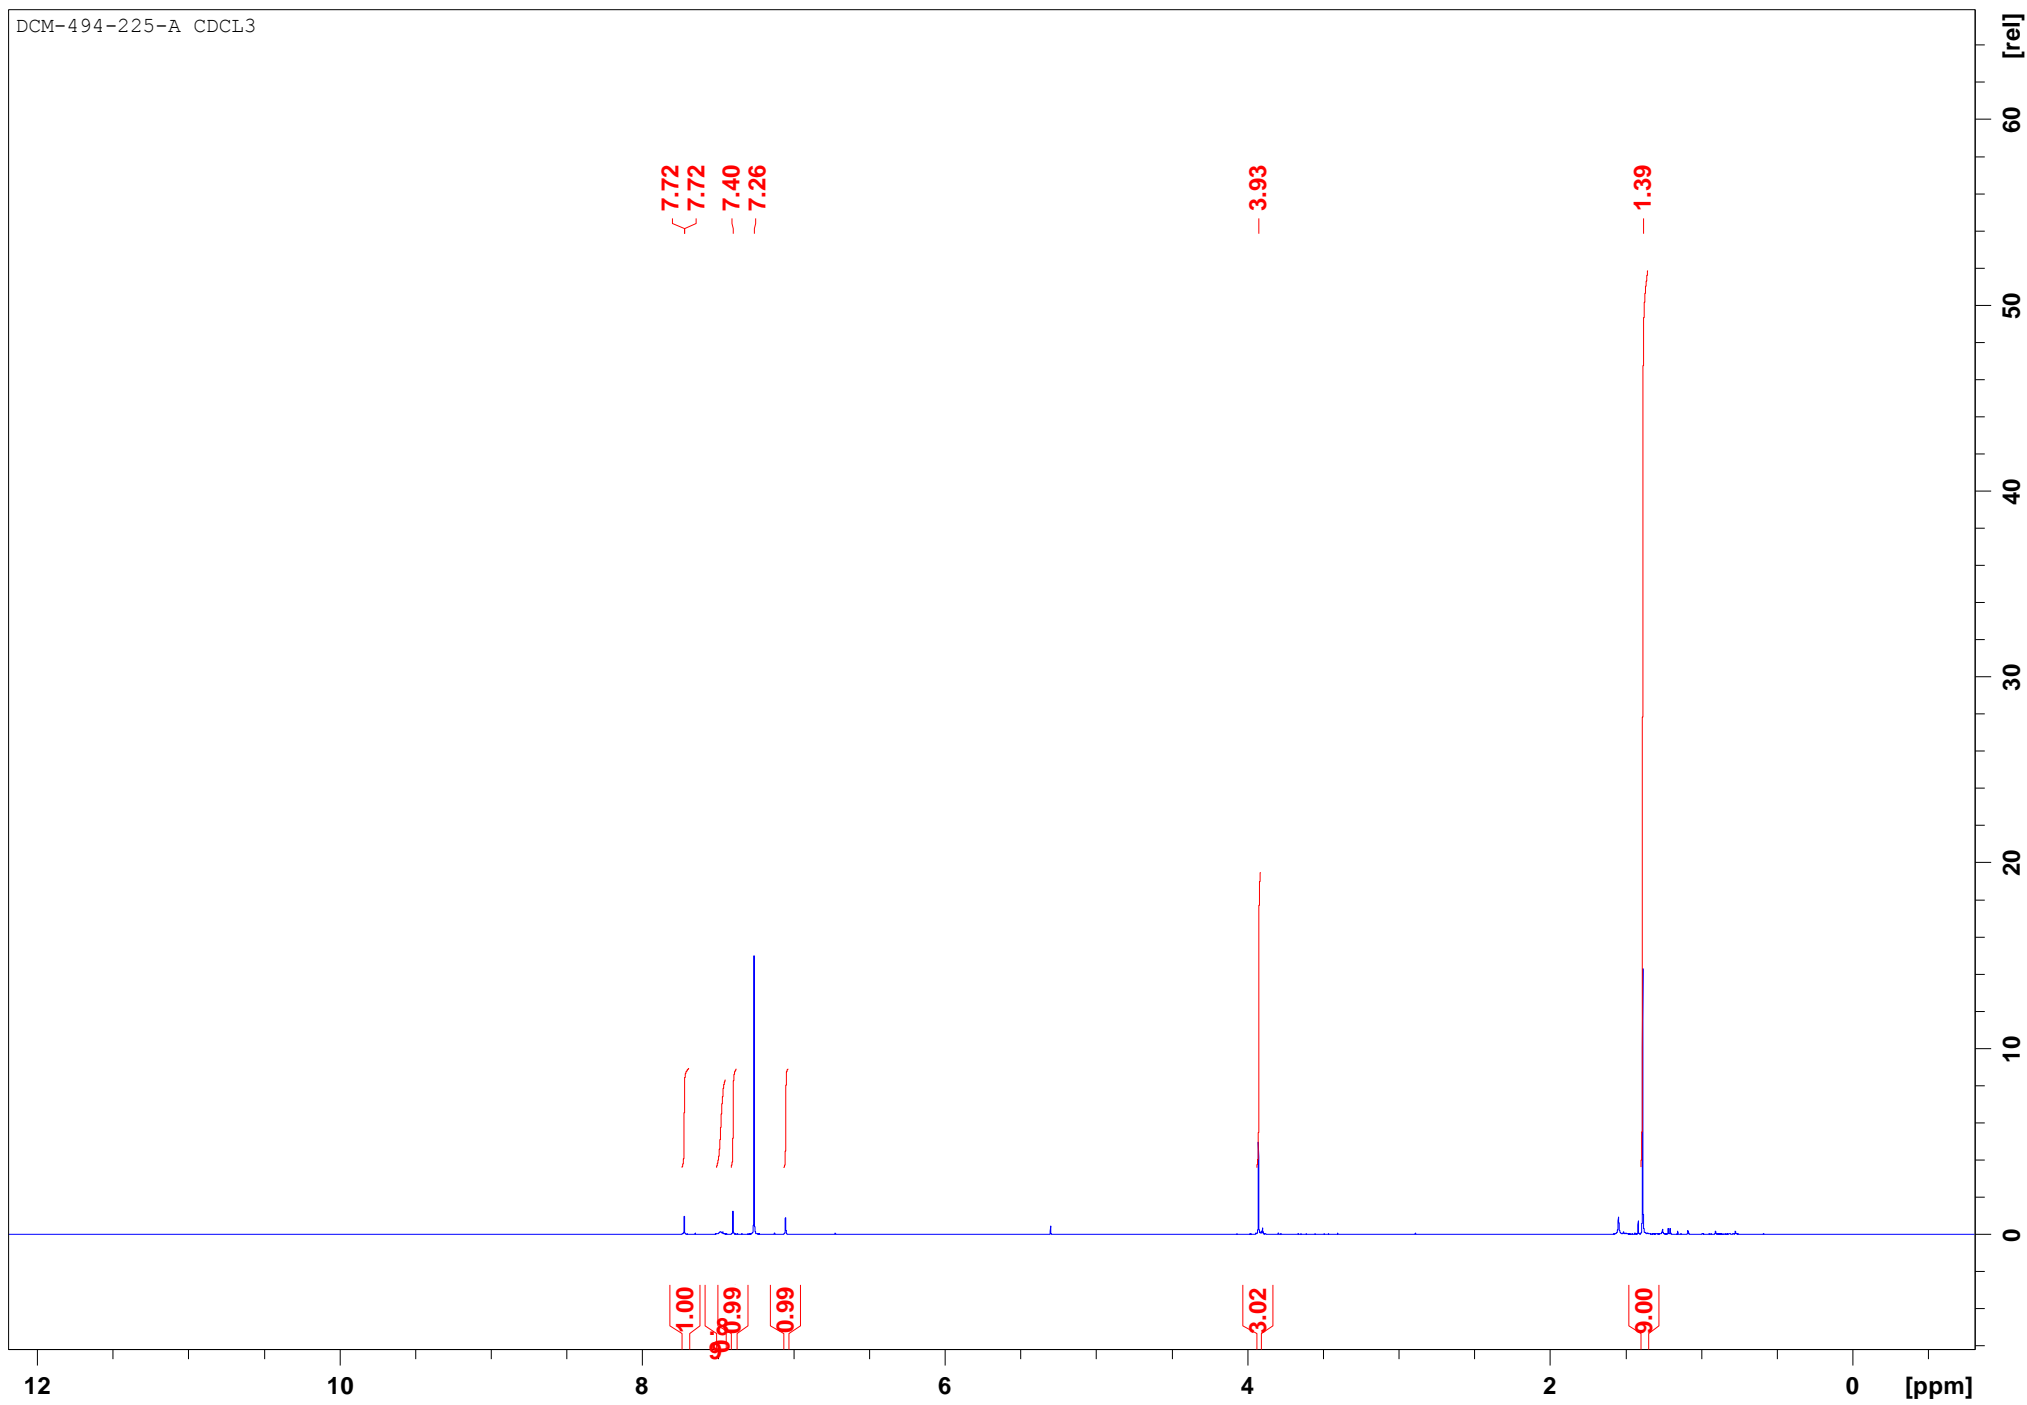

19d

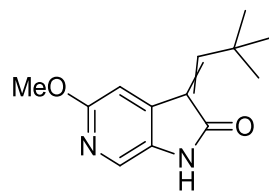

"DCM-494-225-A CDCL3" 11 1 X:\data\DCM\nmr

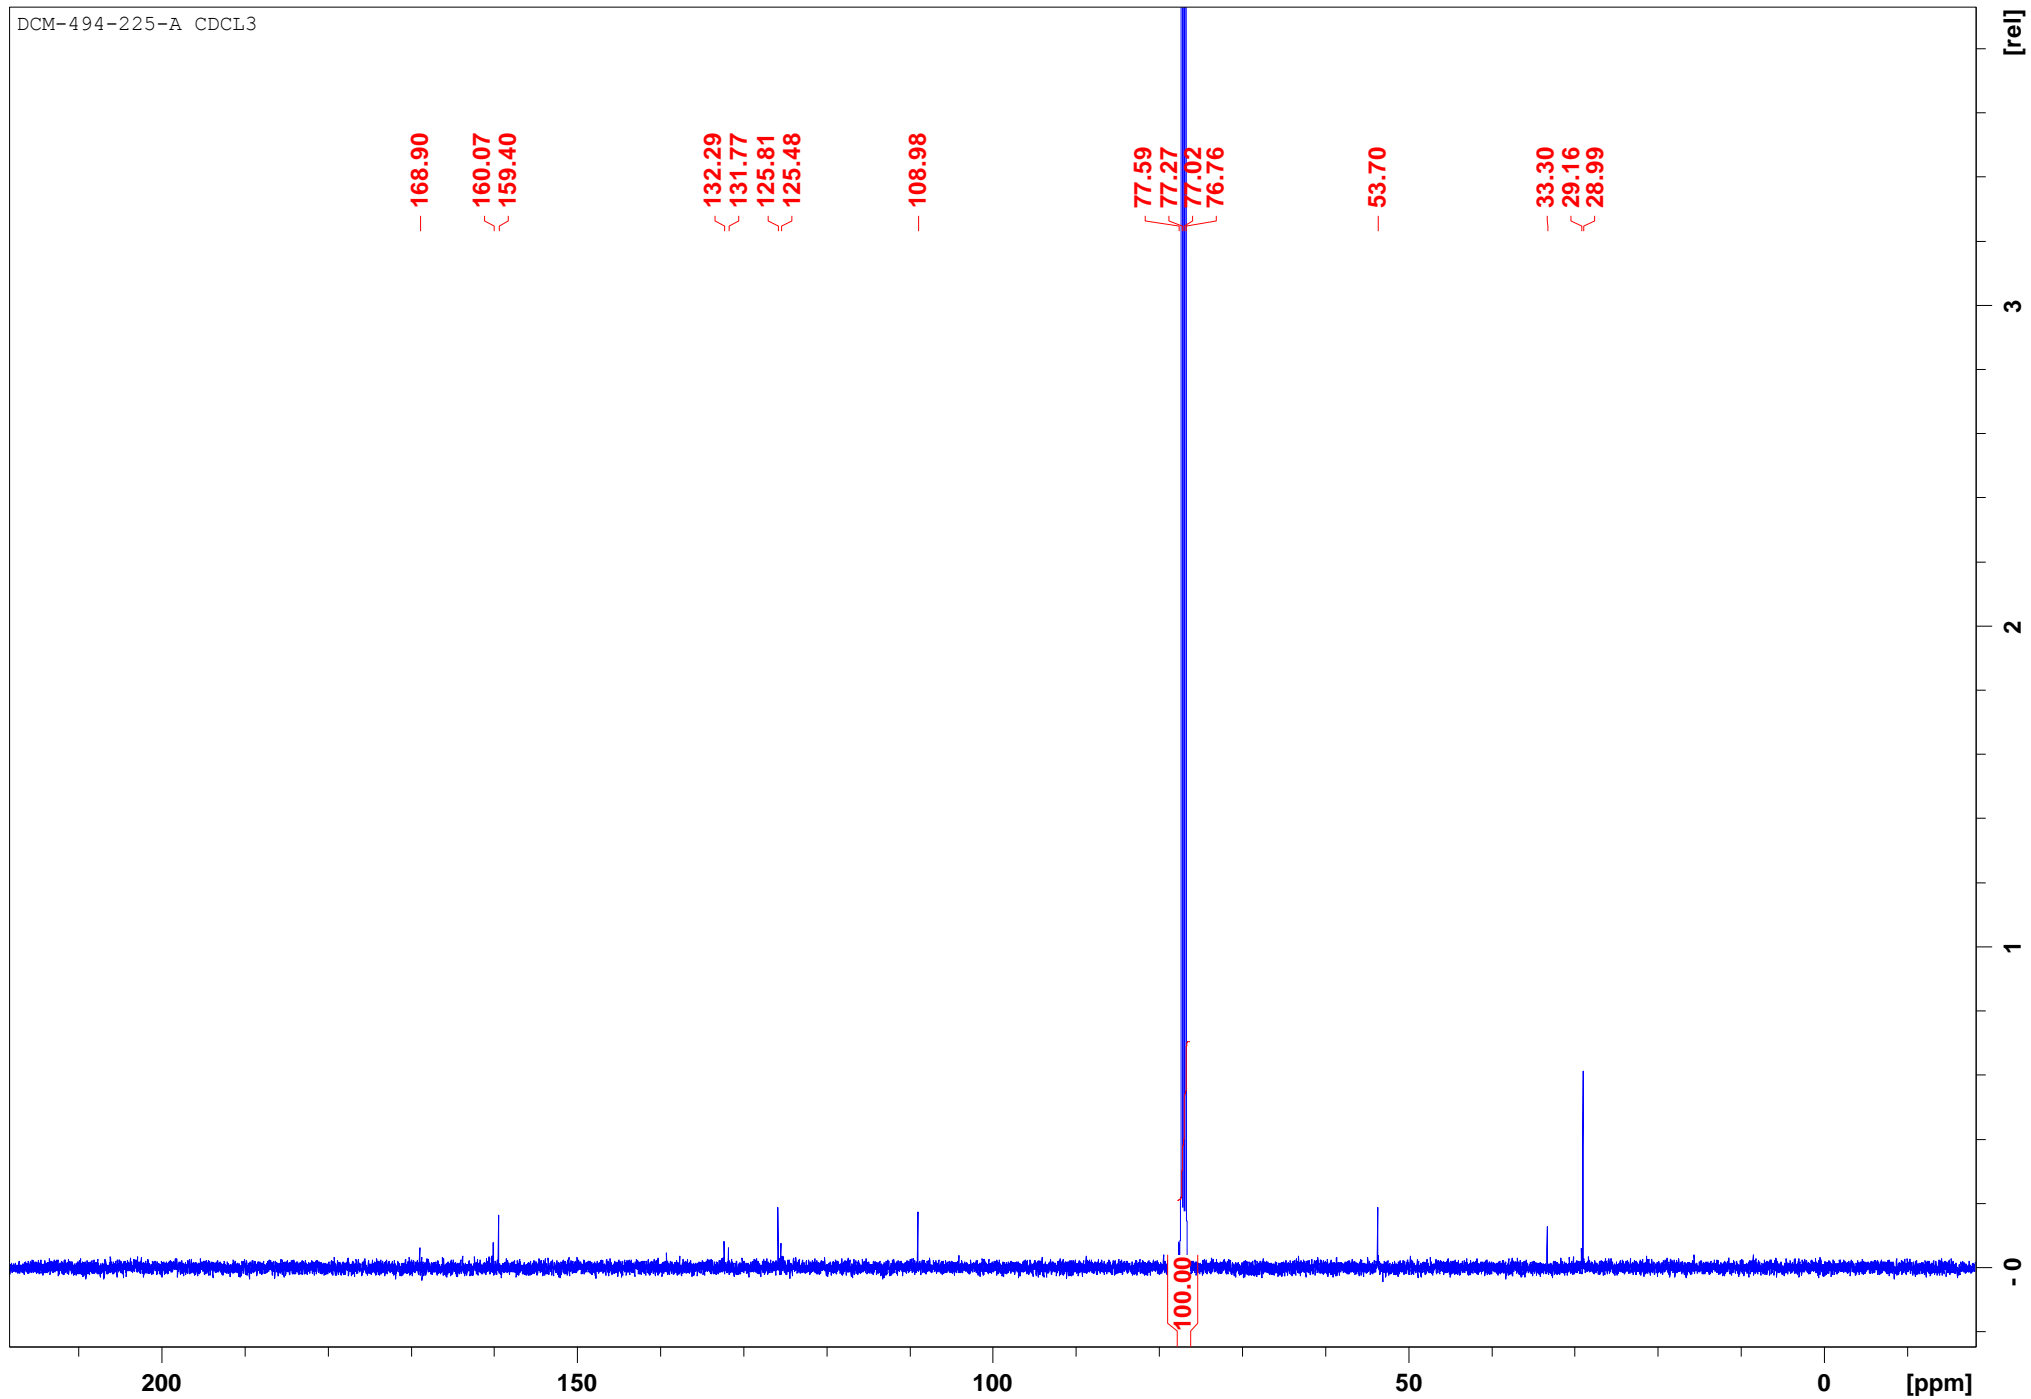

19e

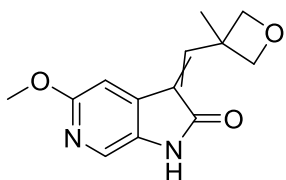

SA-500-152 10 1 "X:\Old Server\SA\nmr"

SA-500-152

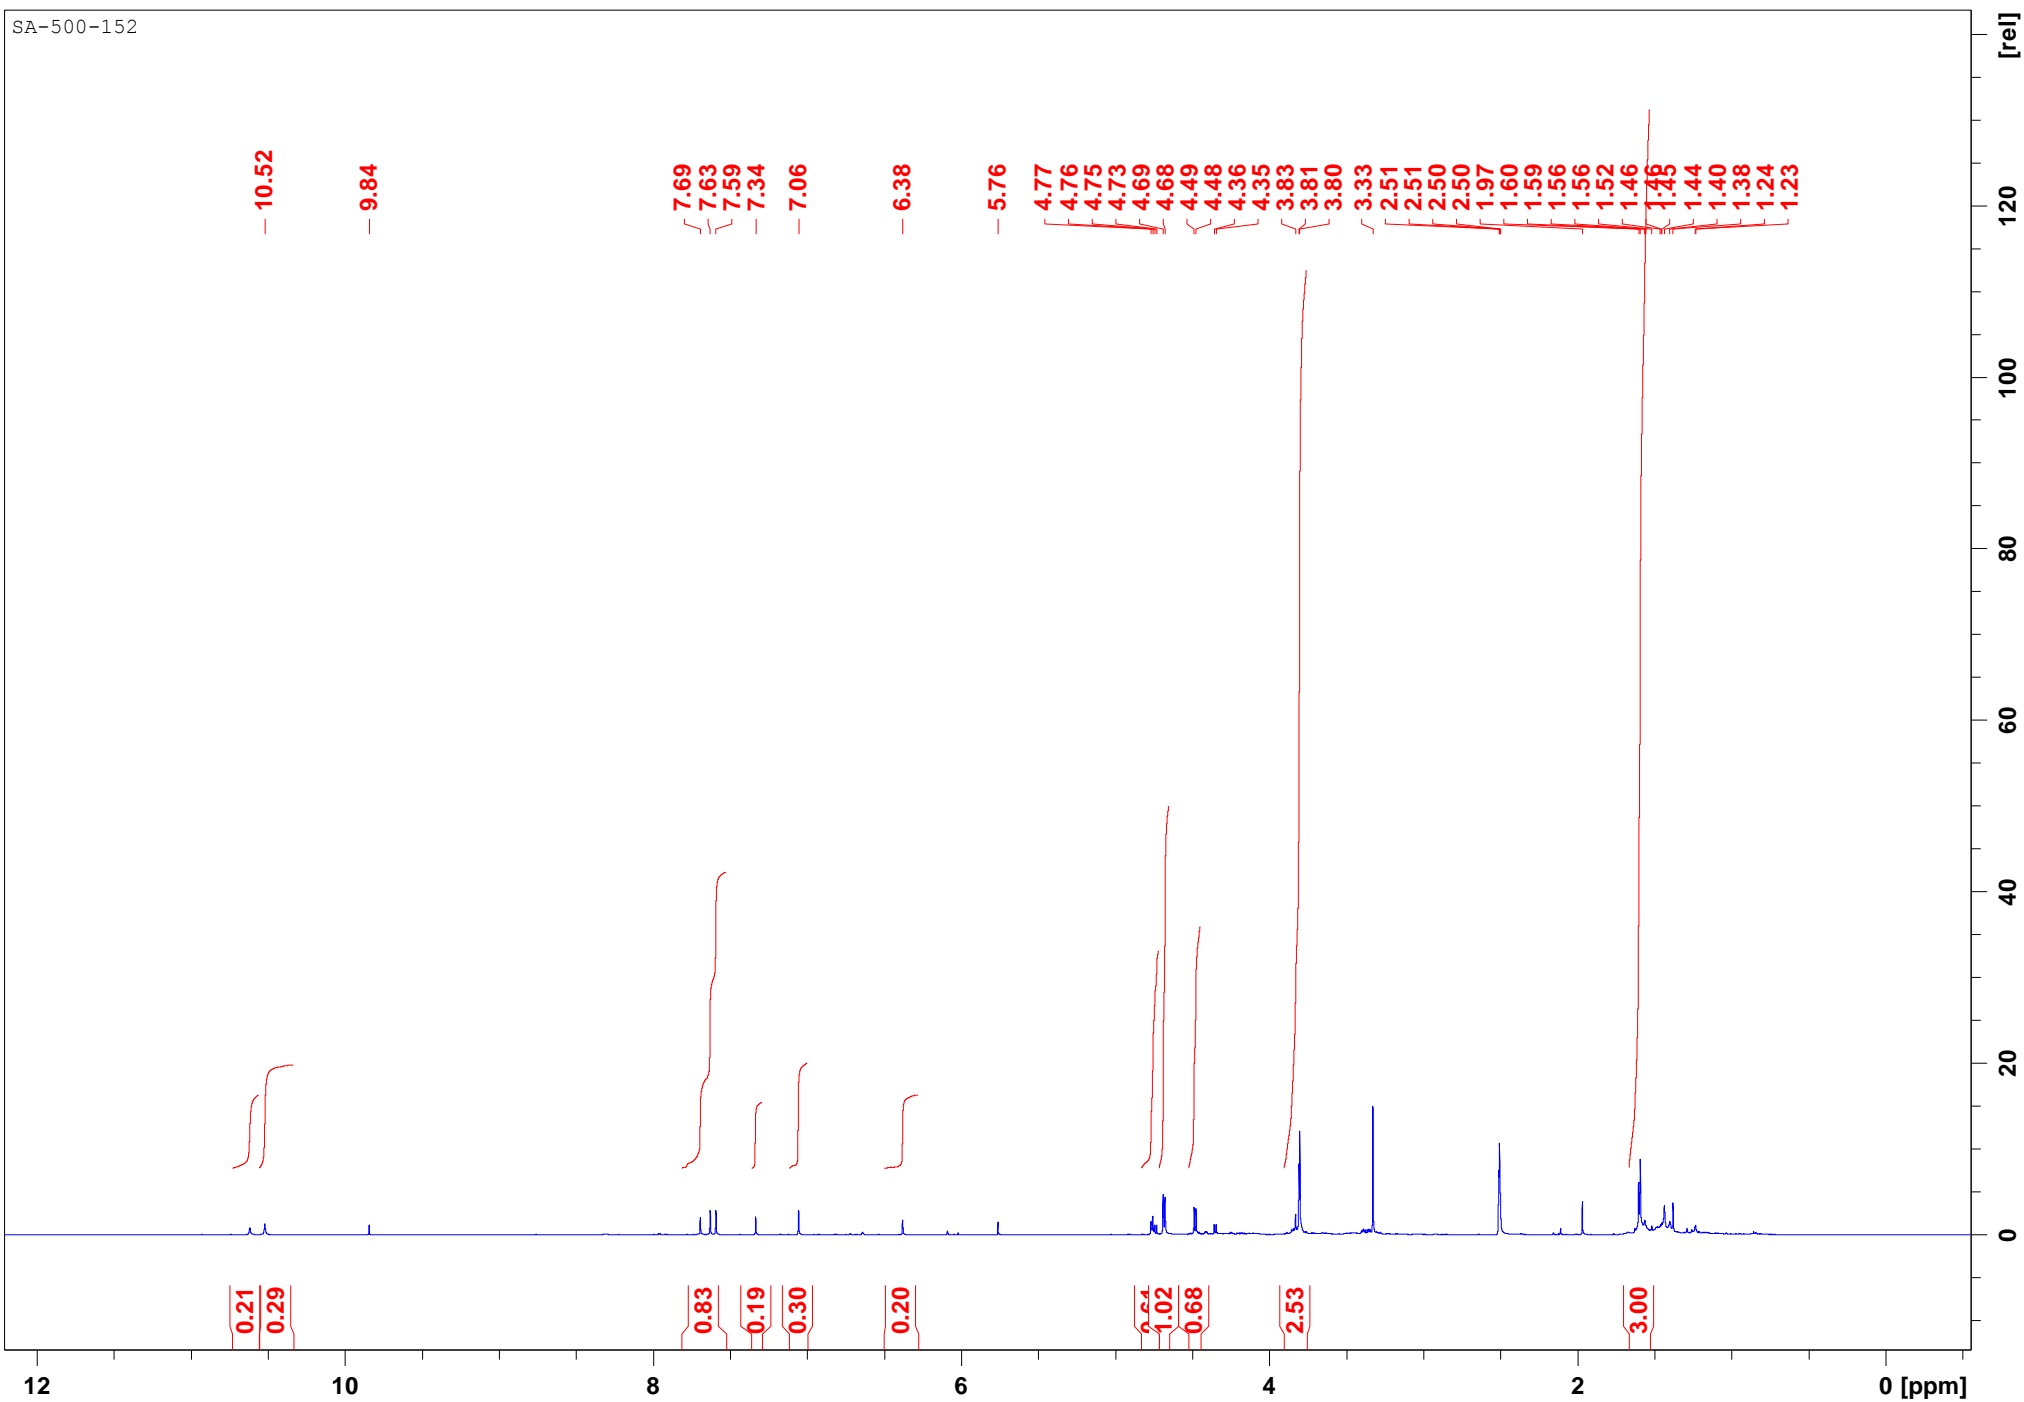

19e



SA-500-138-CONCENTRATED 15 1 "X:\Old Server\SA\nmr"

SA-500-138

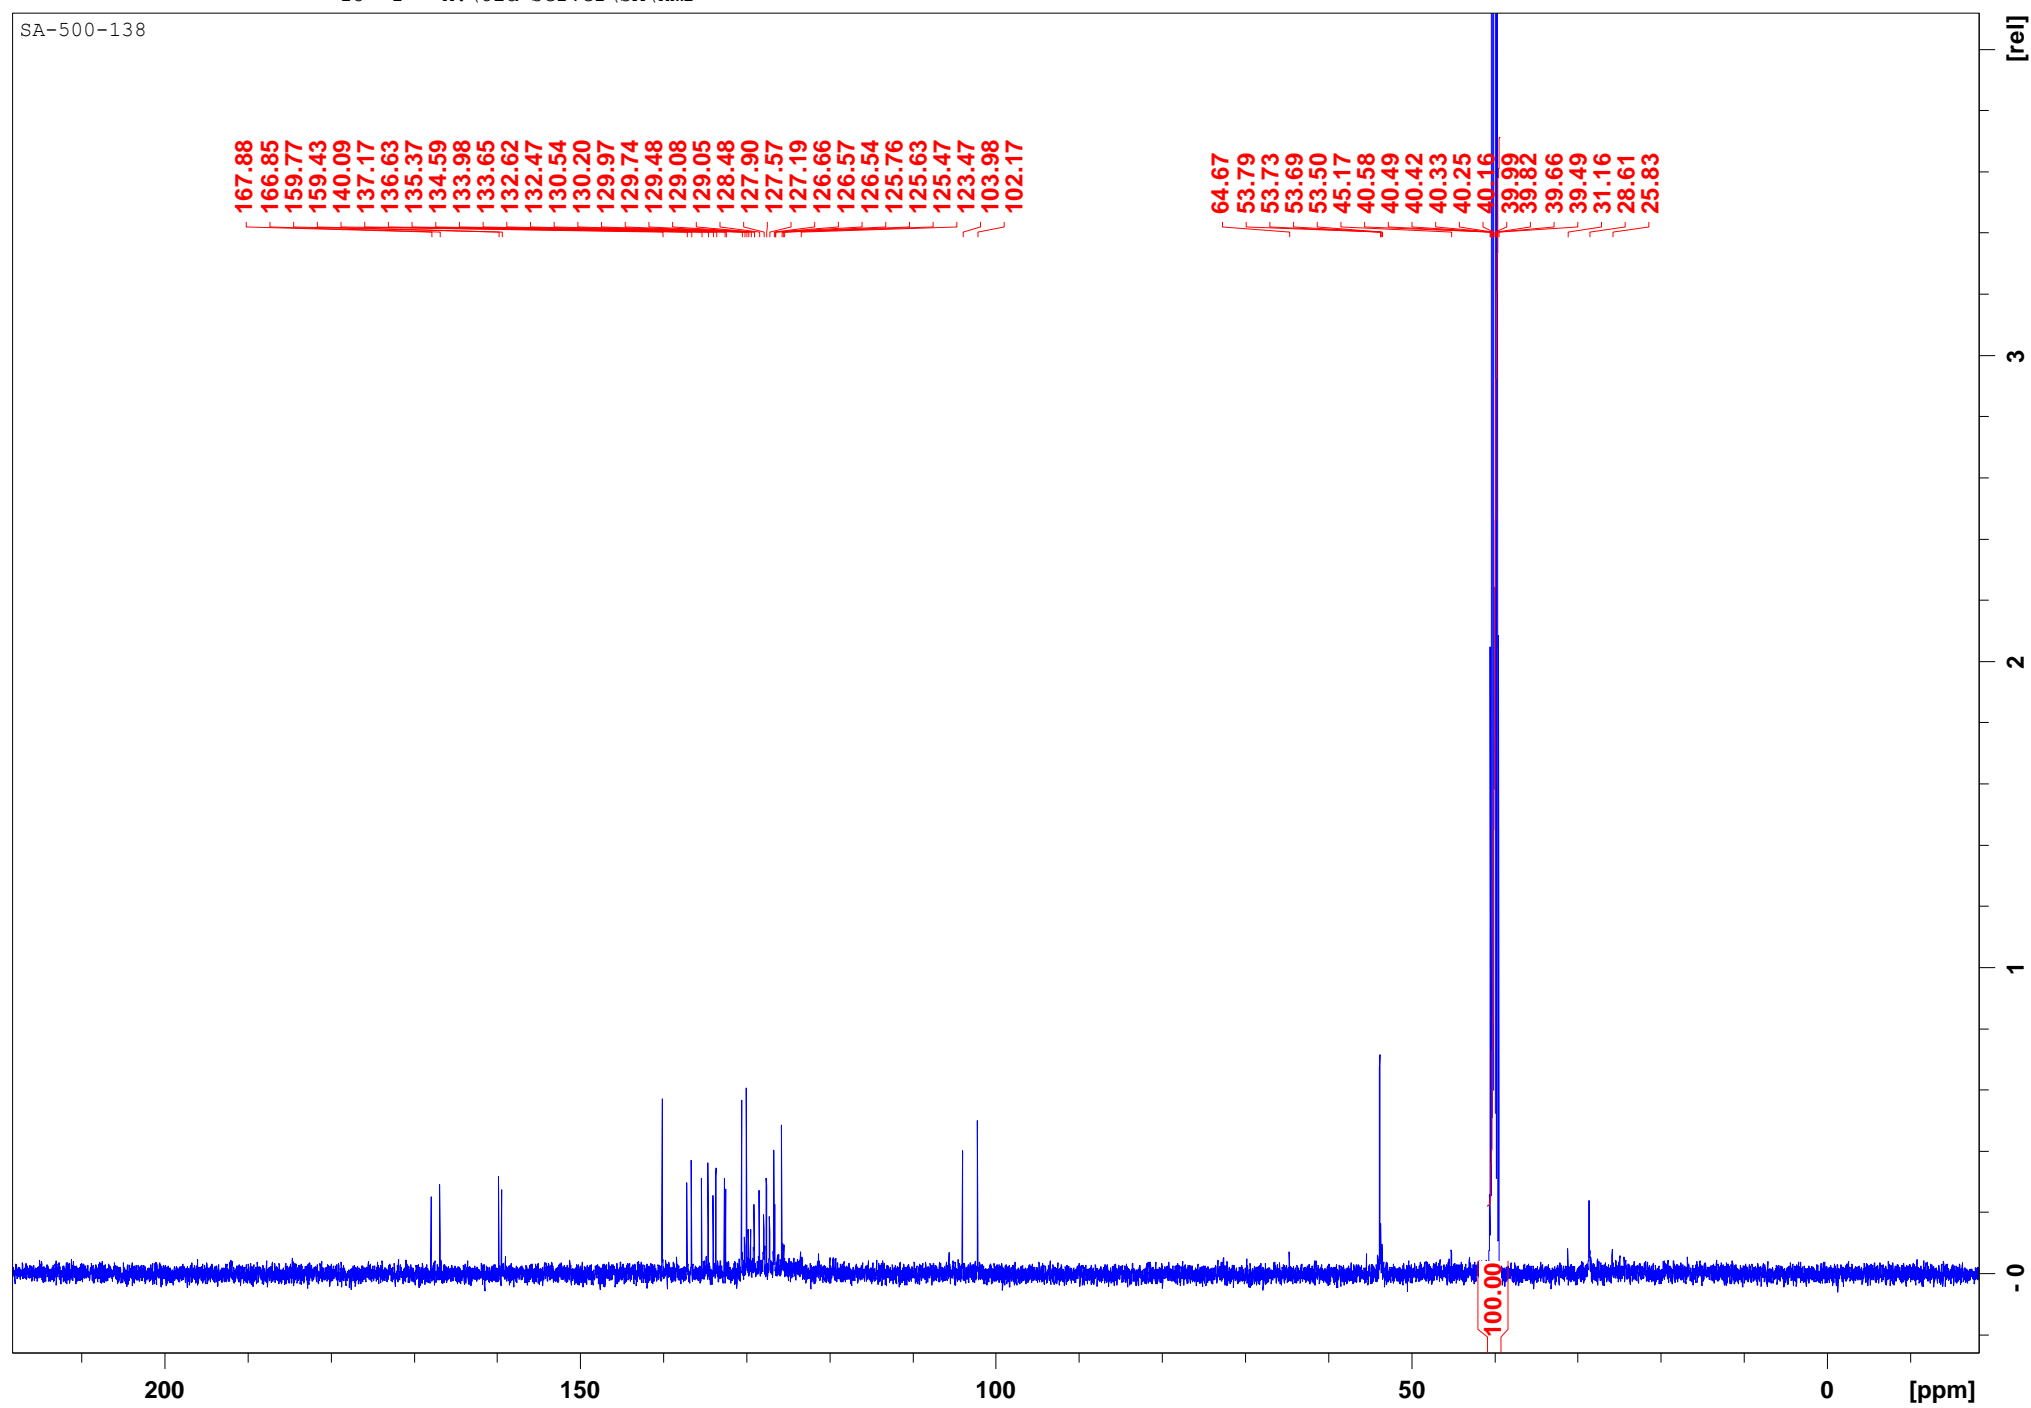

19f

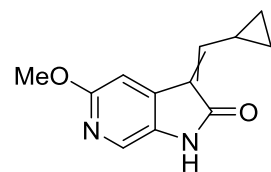

"DCM-494-193-A CDCL3" 10 1 "X:\Old Server\DCM\nmr"

DCM-494-193-A CDCL3

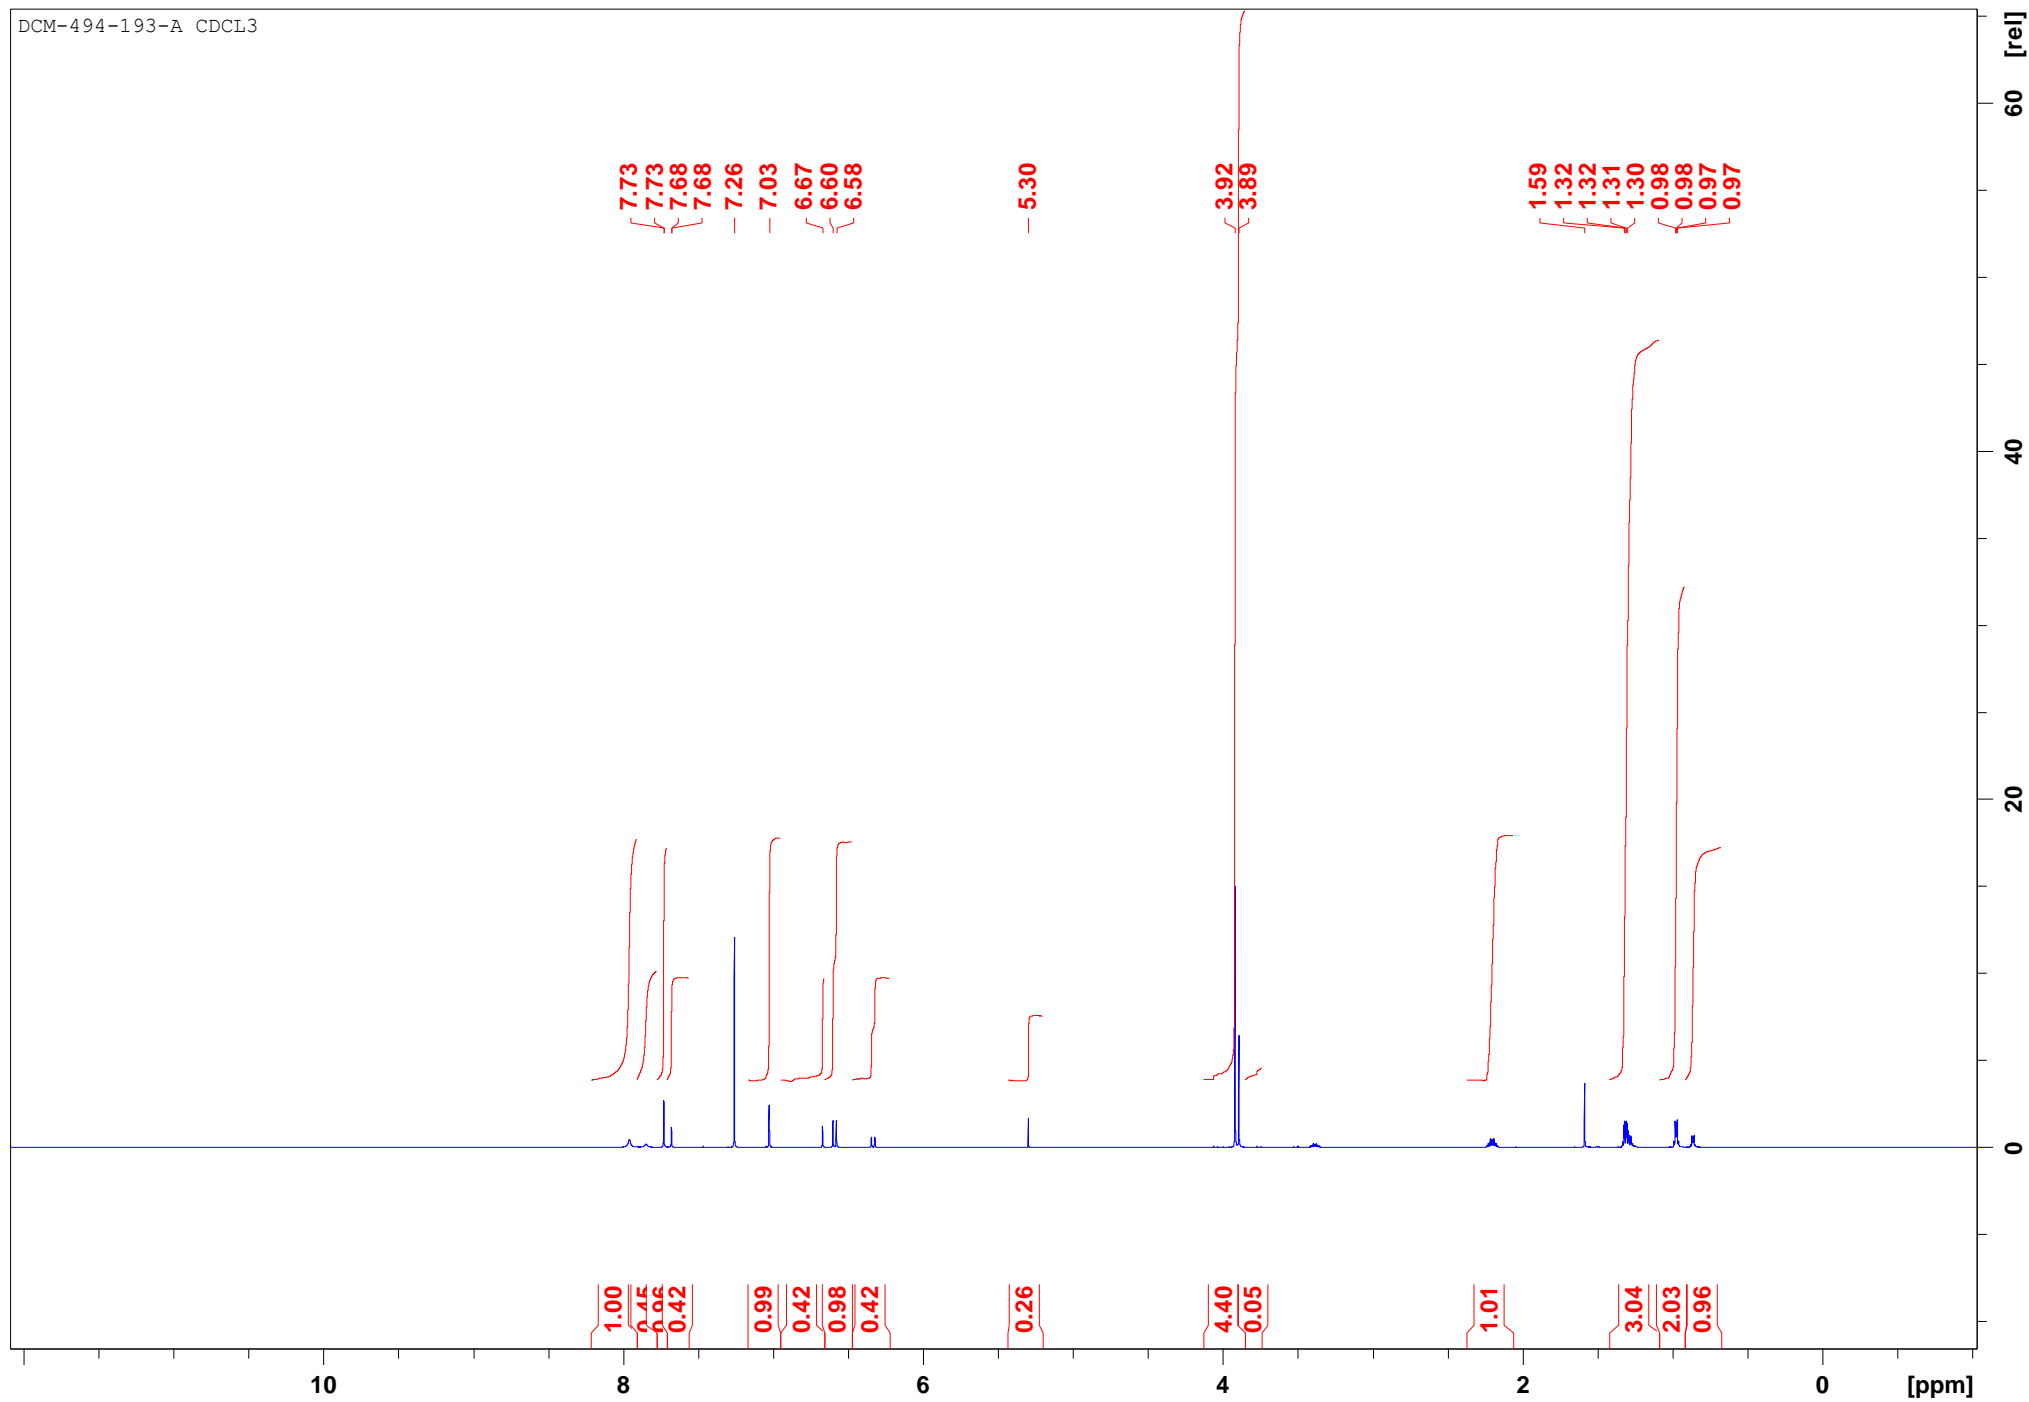

20d

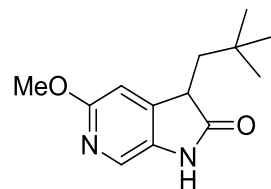

"DCM-494-228-A CDCL3" 10 1 X:\data\DCM\nmr

DCM-494-228-A CDCL3

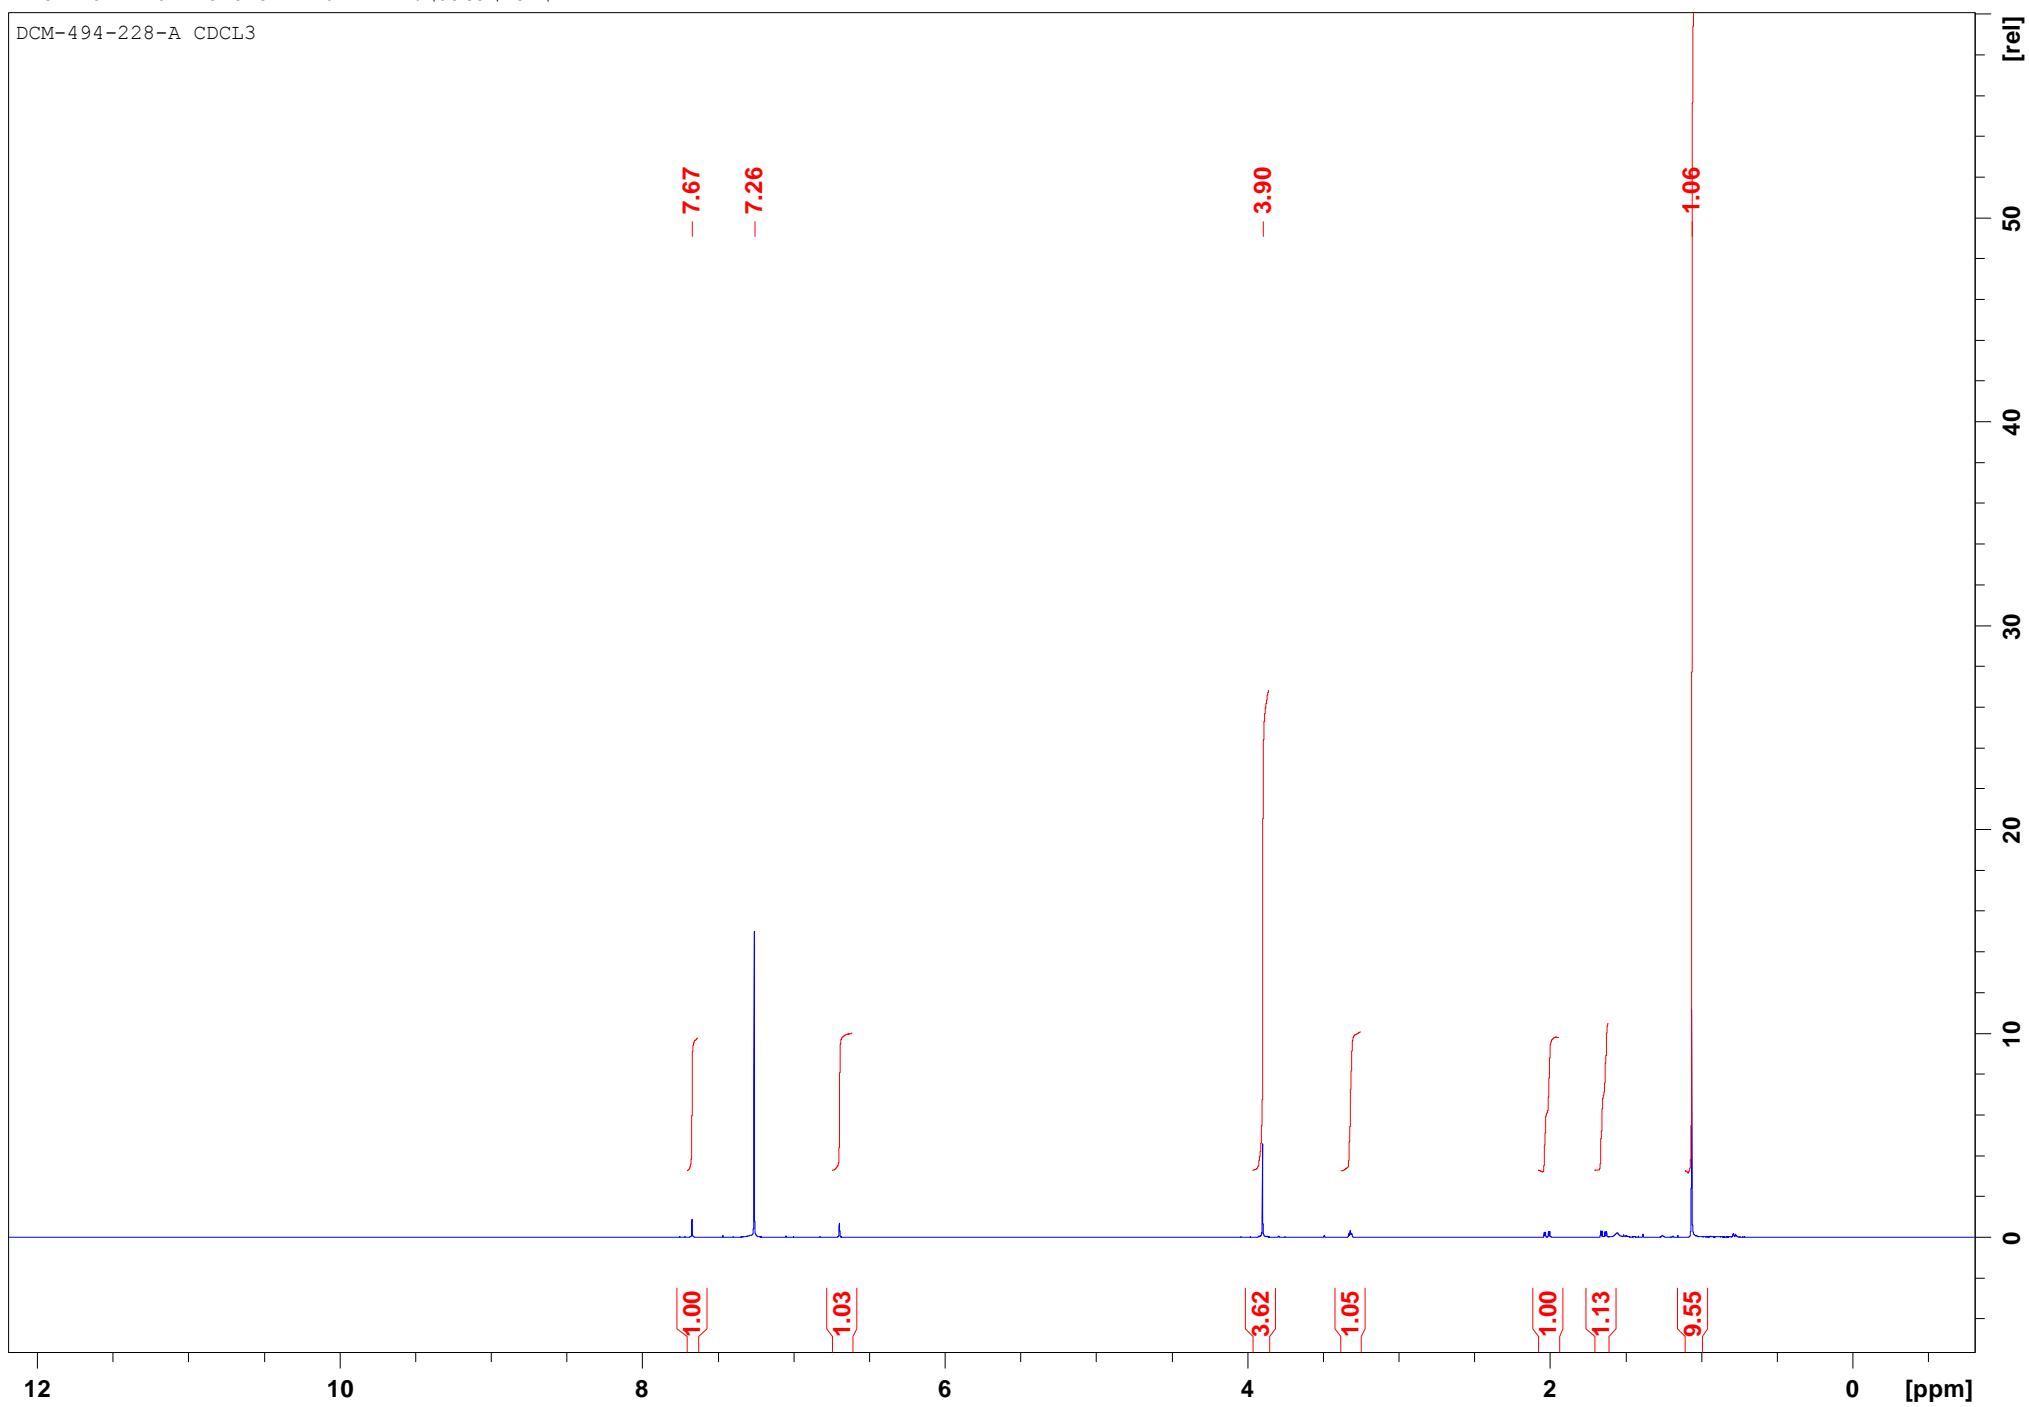

20f

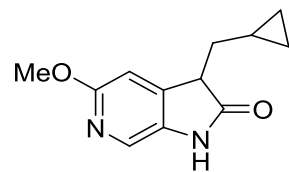

"DCM-494-199-CR CDCL3" 10 1 "X:\Old Server\DCM\nmr"

DCM-494-199-CR CDCL3

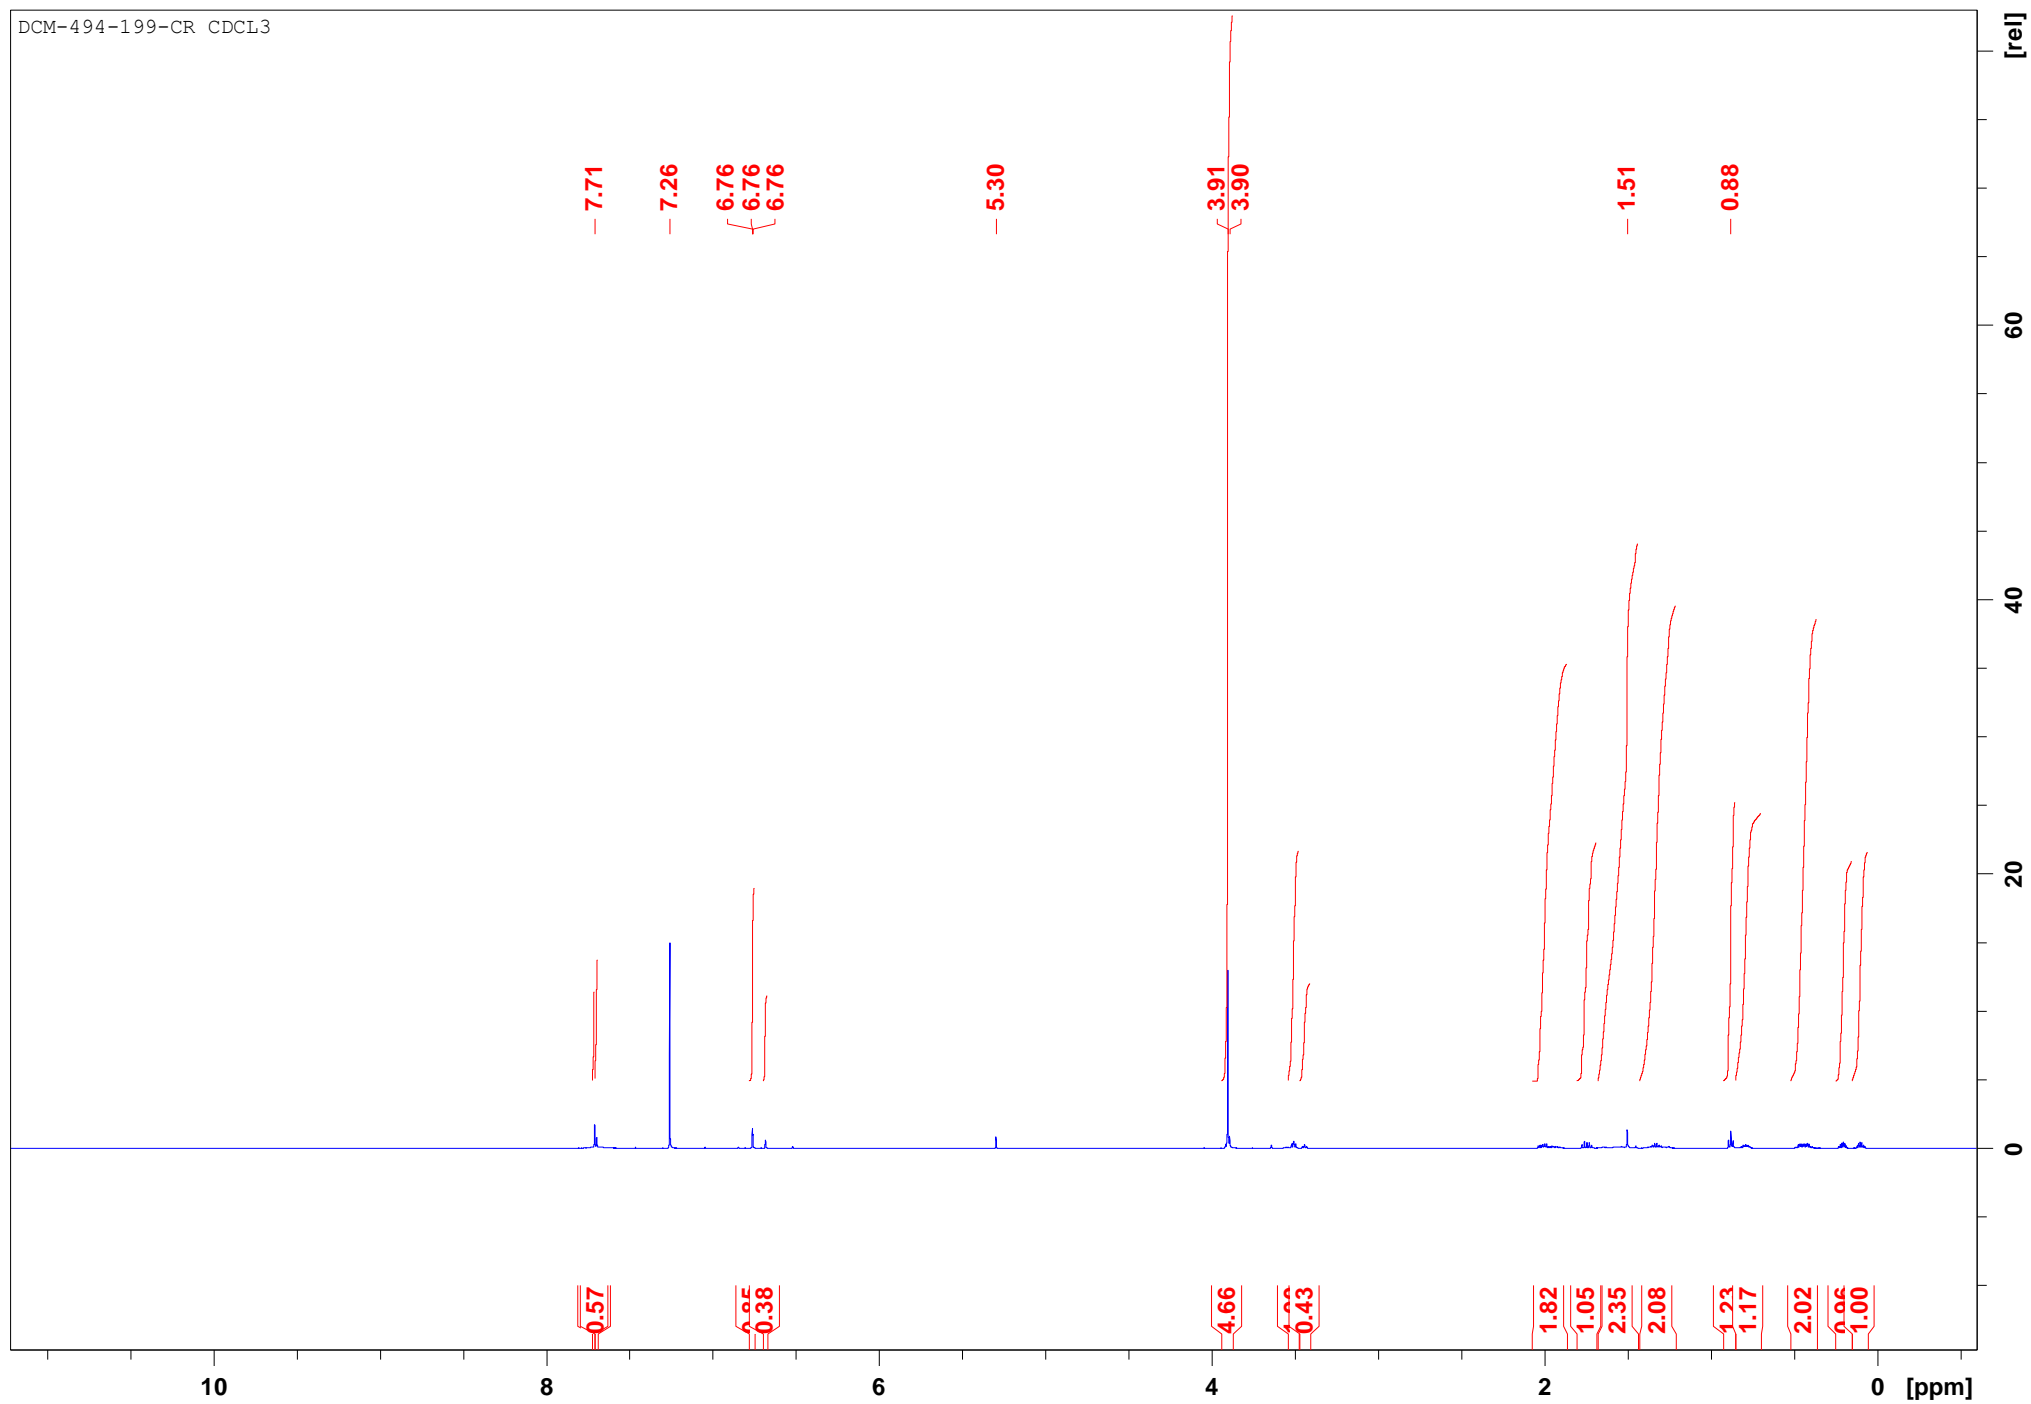



20f

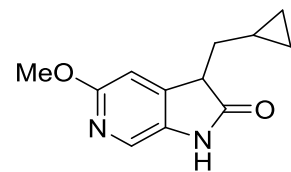

"DCM-494-199 CDCL3" 10 1 "X:\Old Server\DCM\nmr"

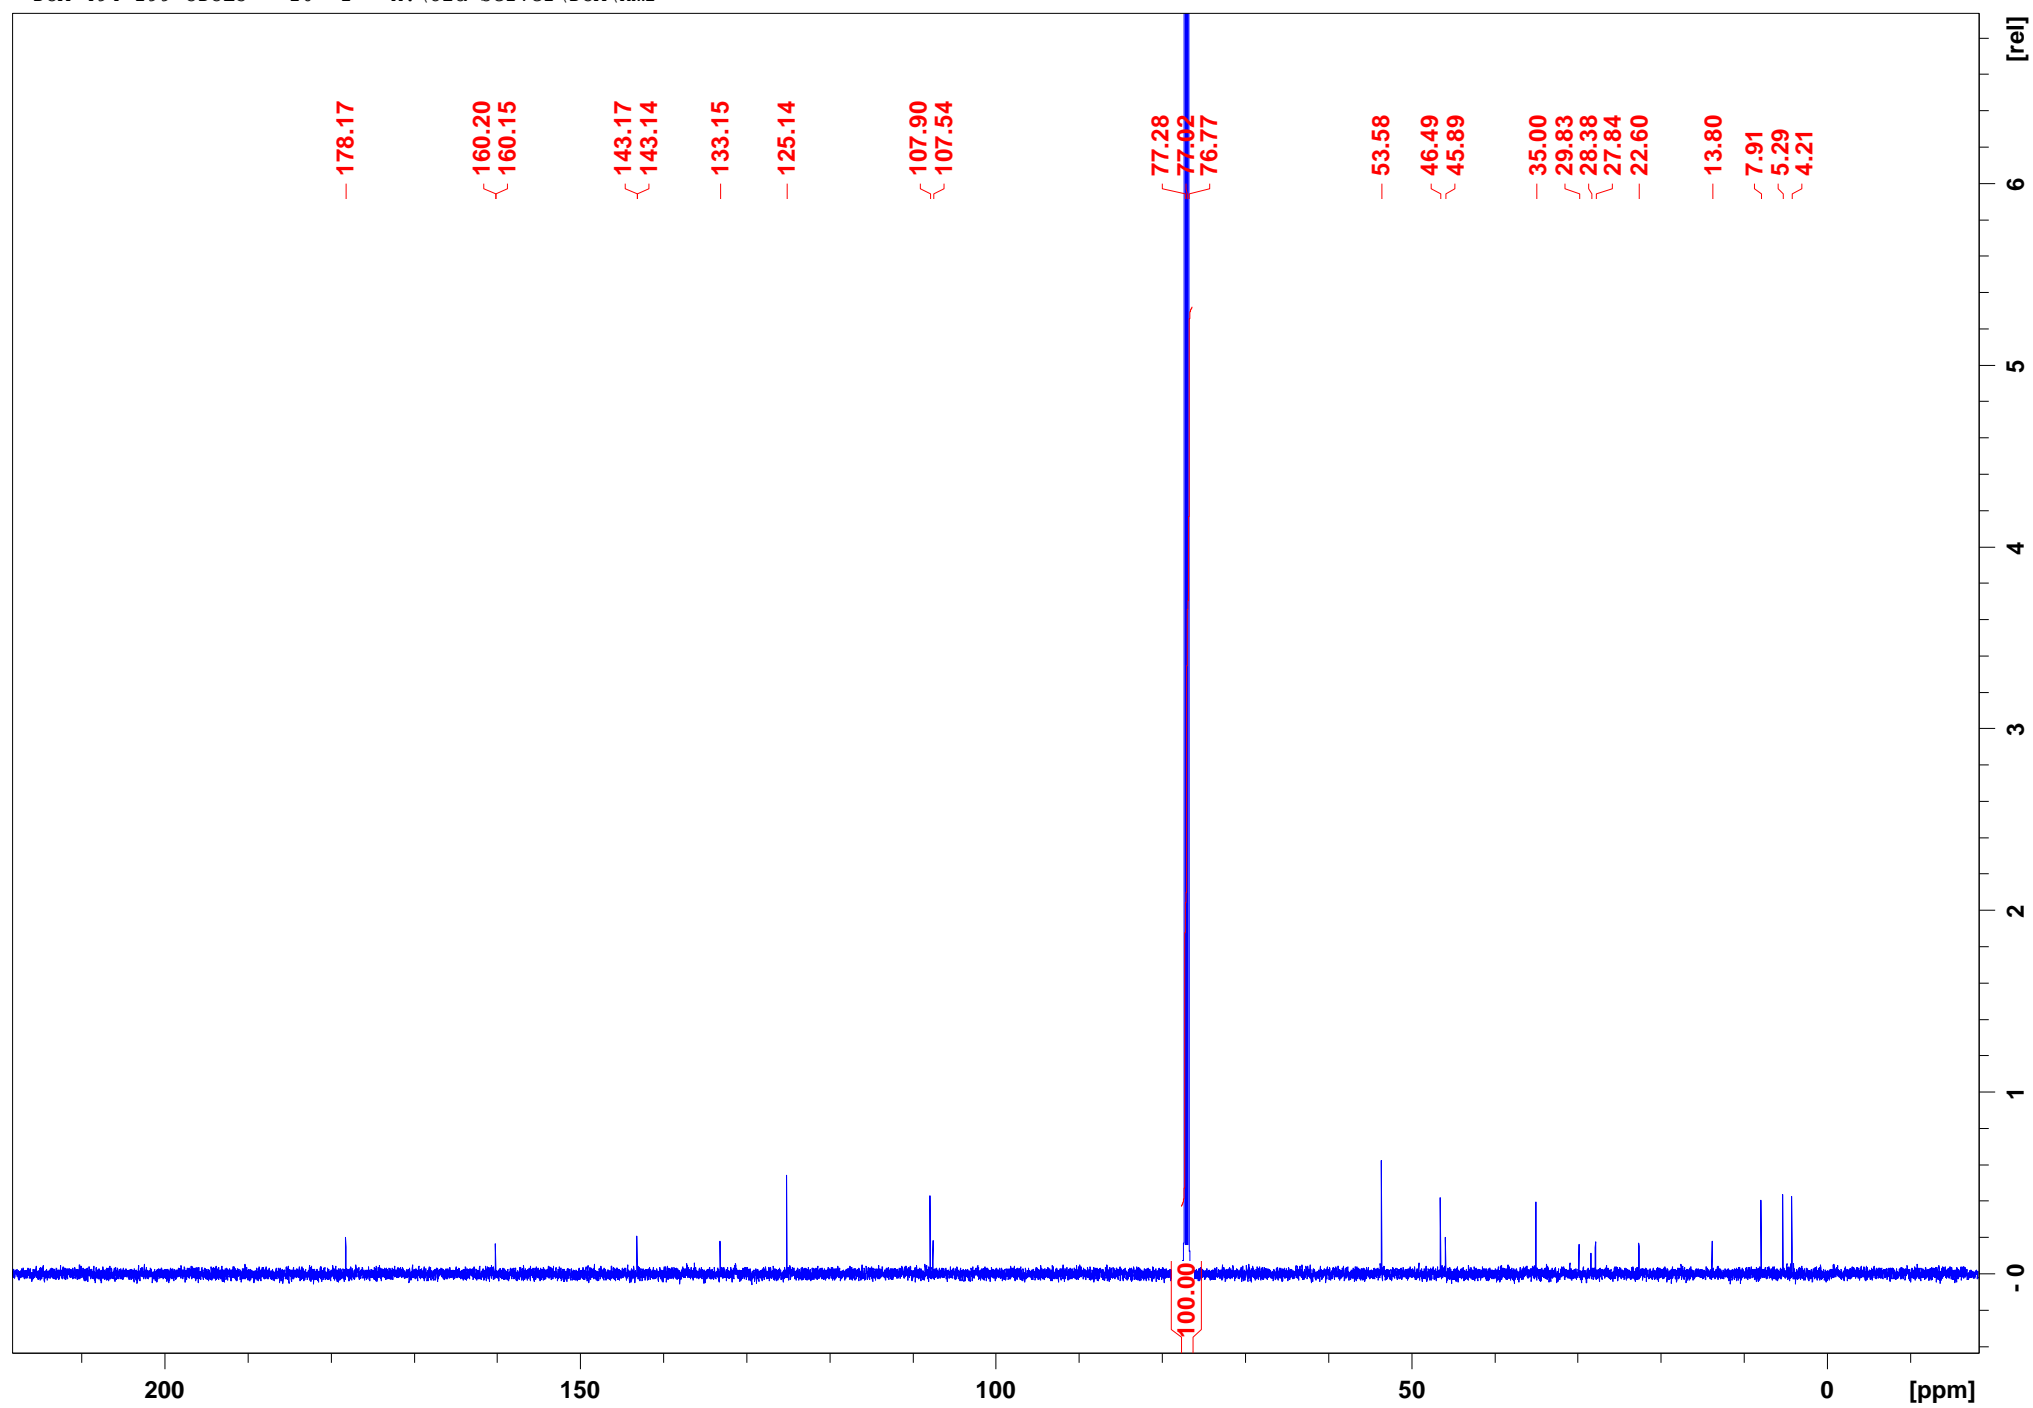

21a

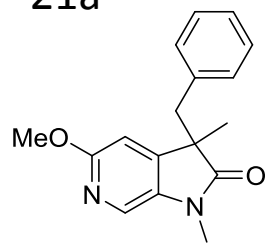

SA-500-132 10 1 "X:\Old Server\SA\nmr"

SA-500-132

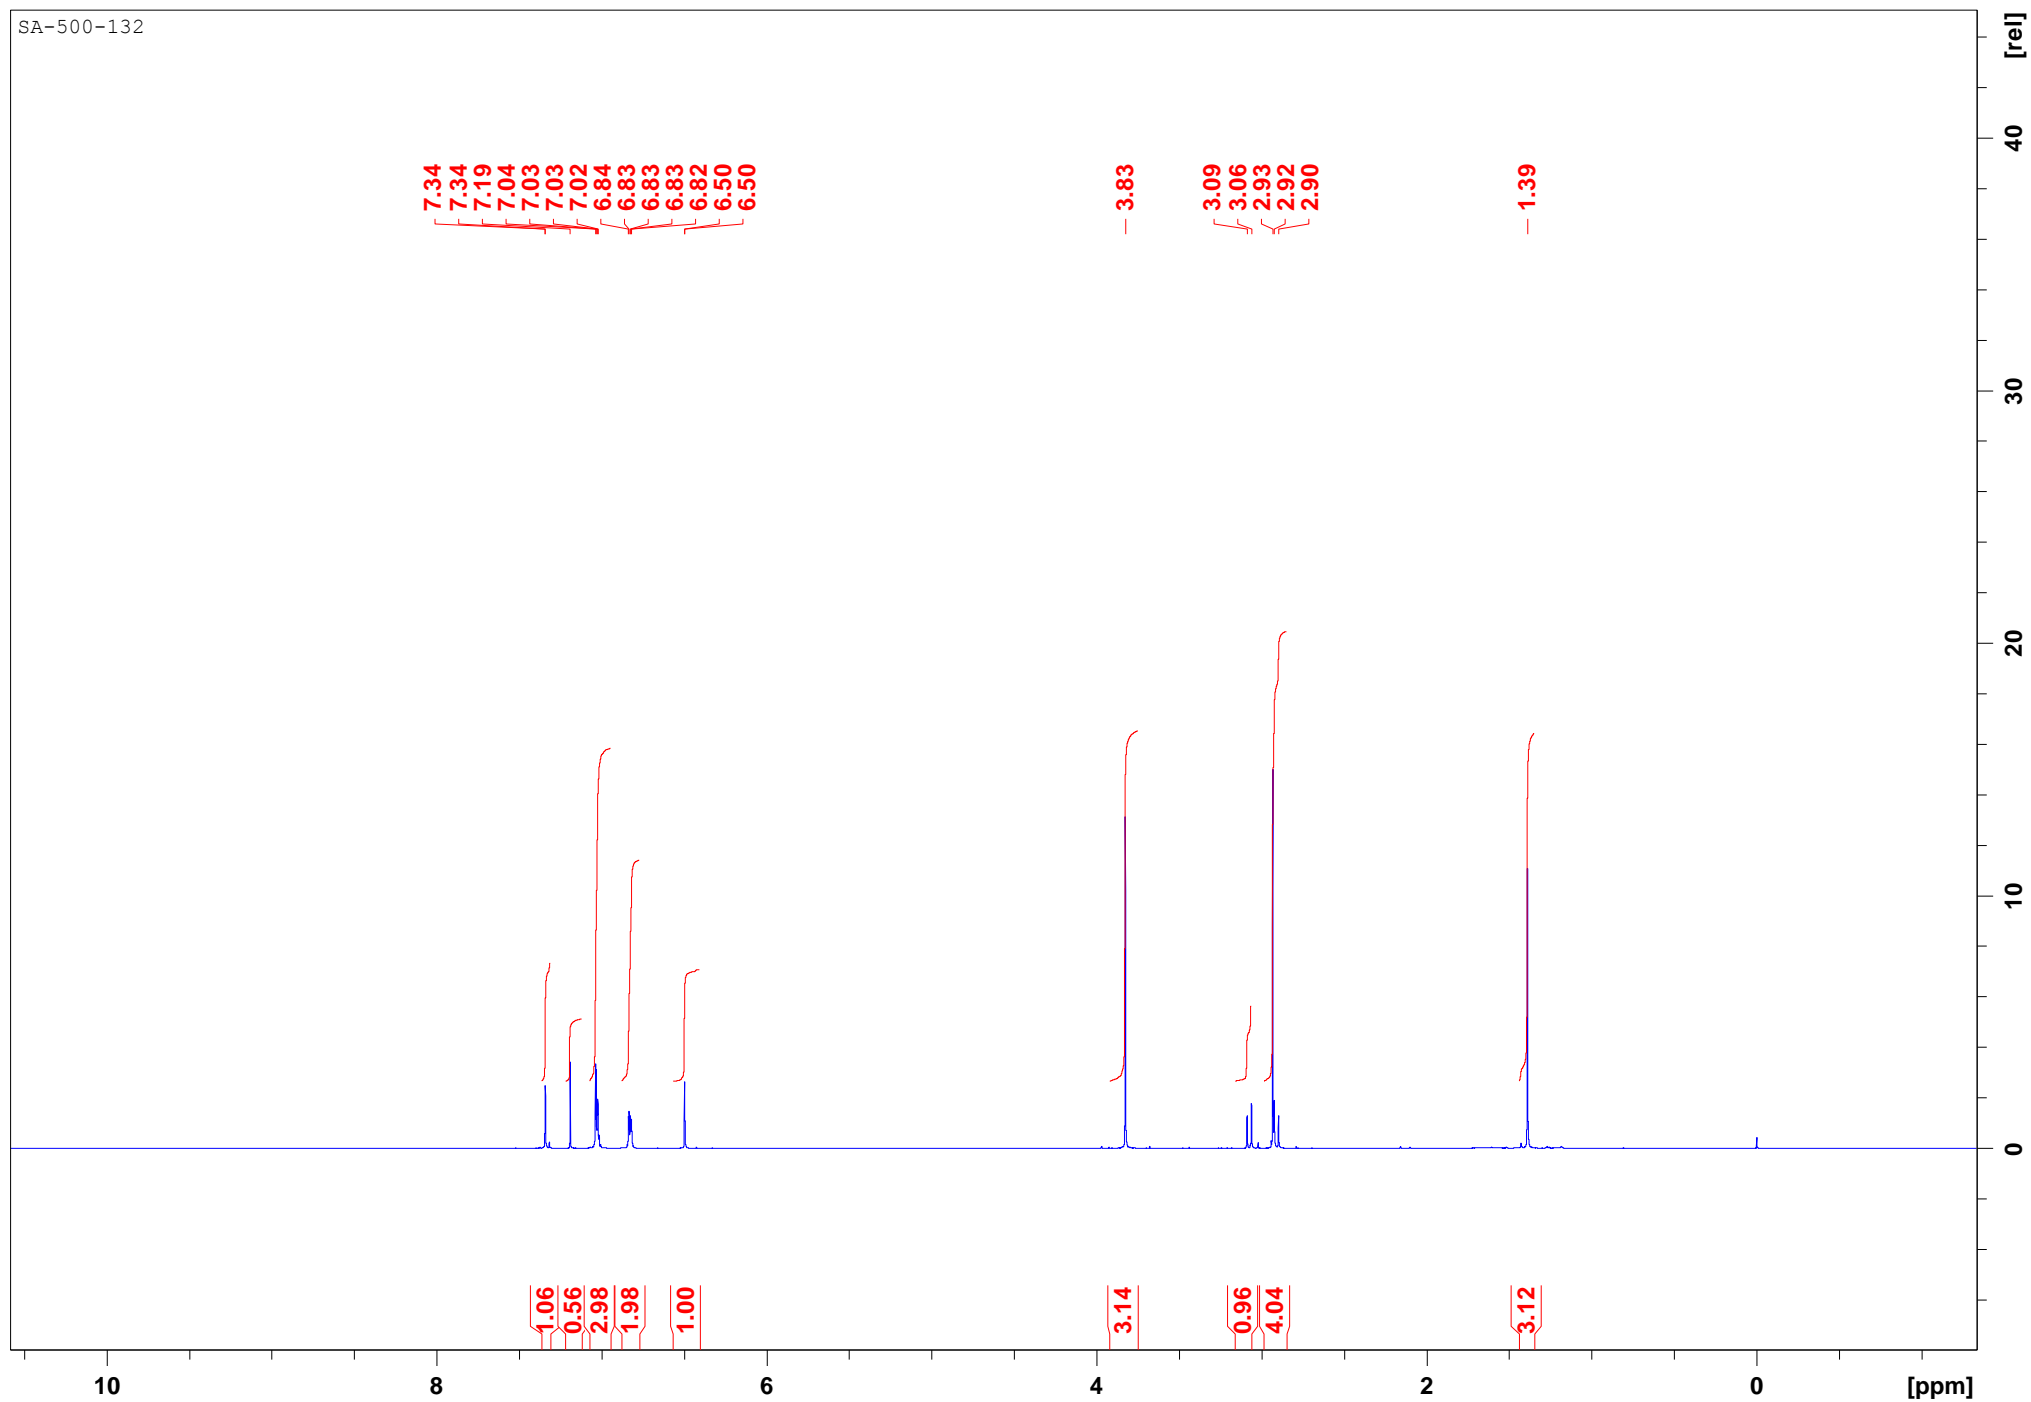

21a



SA-500-132 11 1 "X:\Old Server\SA\nmr"

SA-500-132

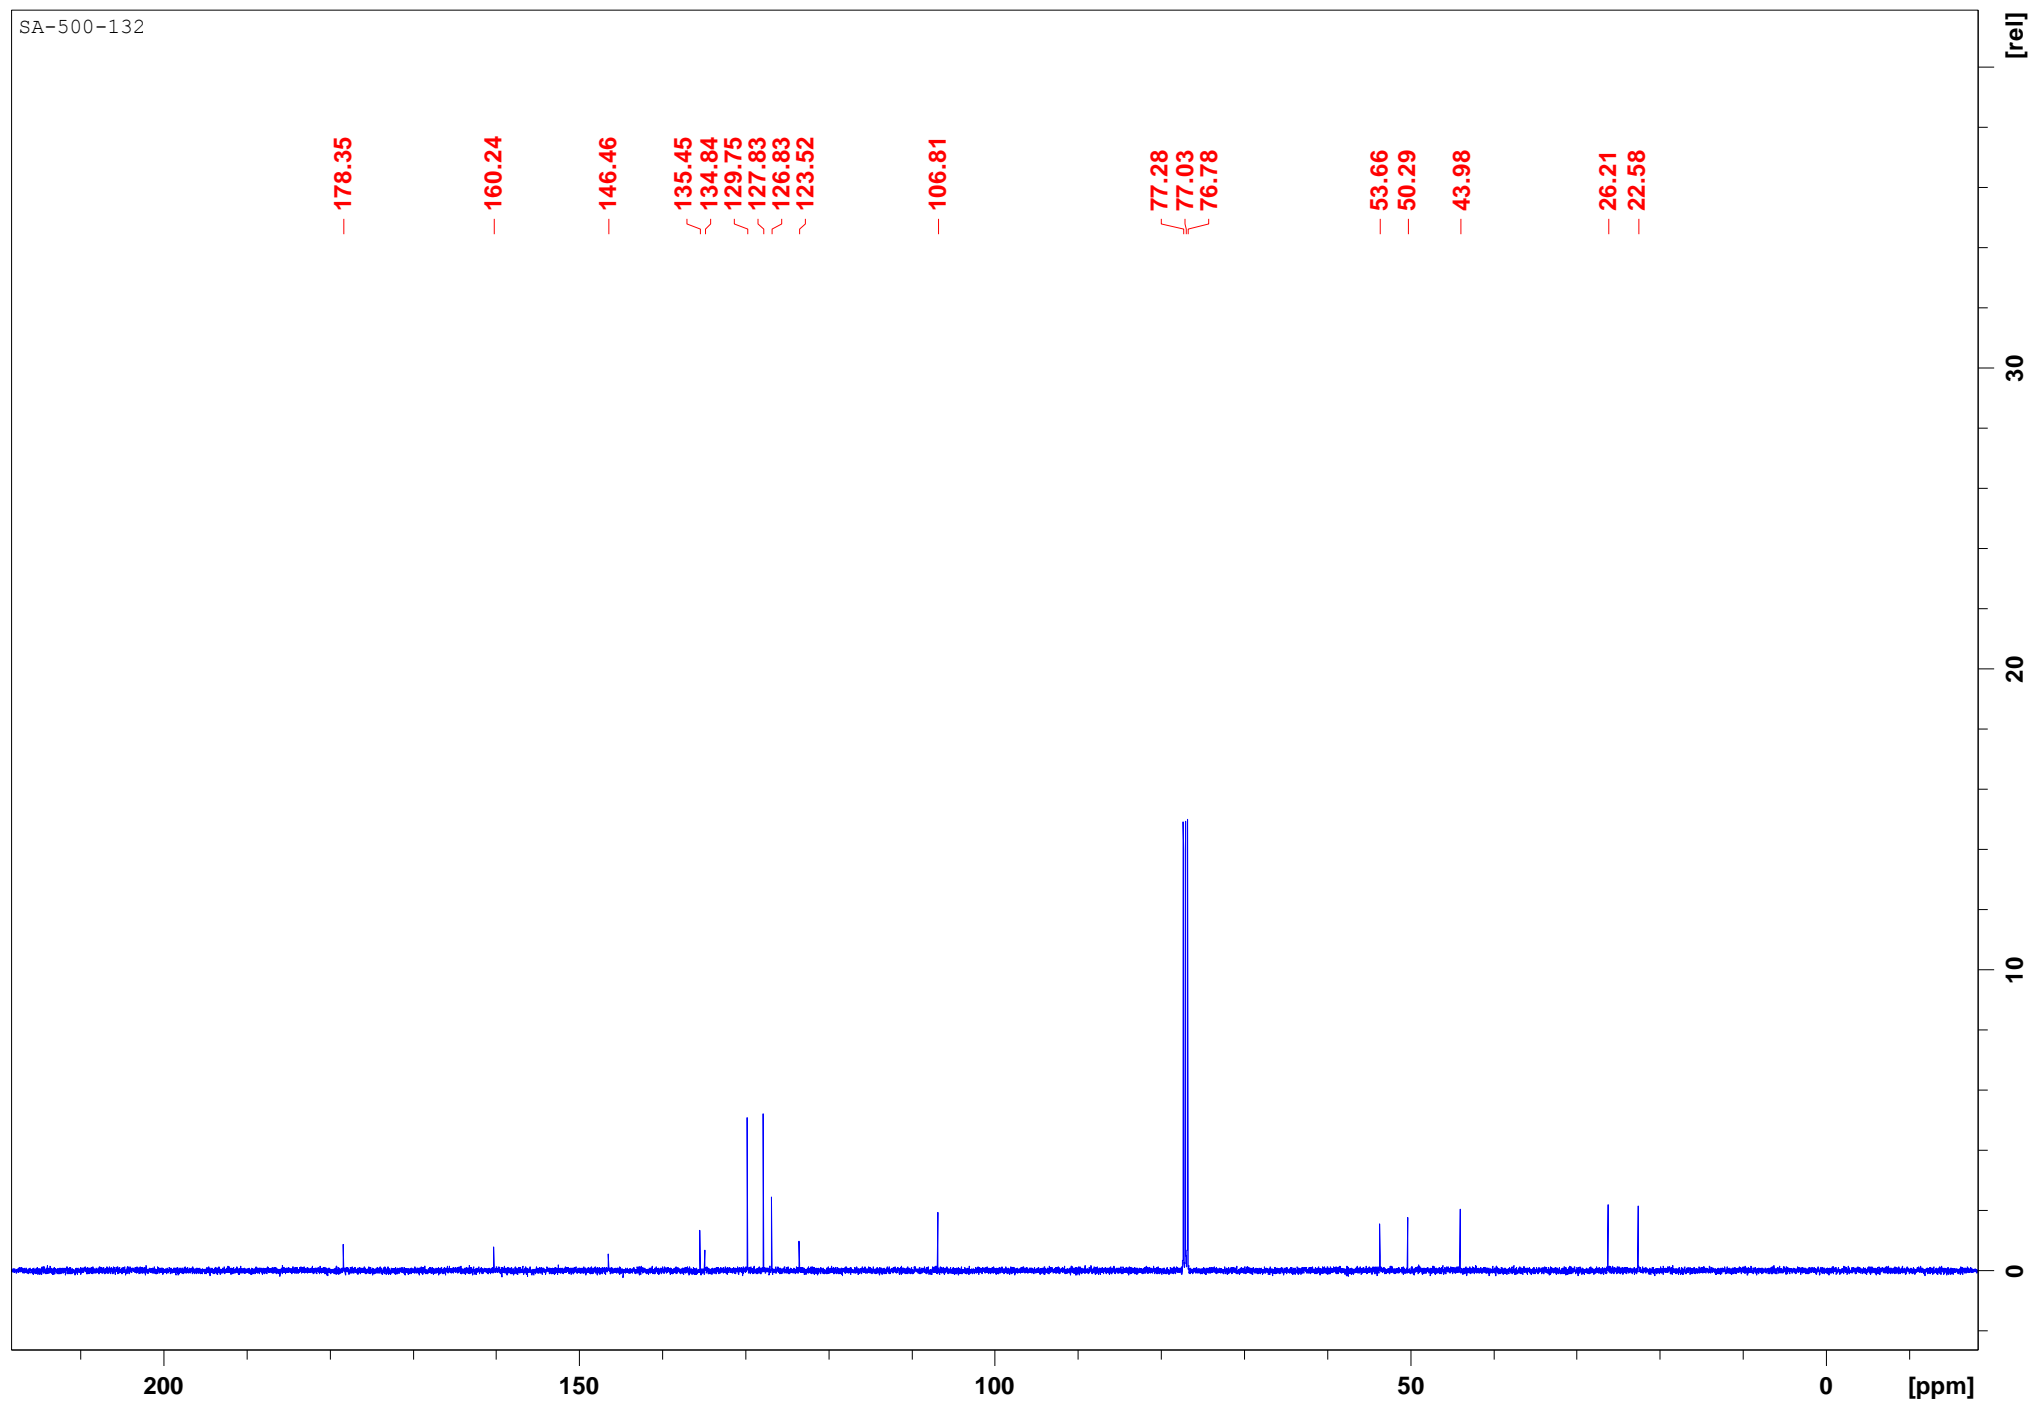

21b

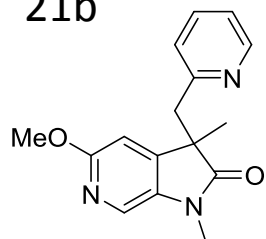

SA-500-122 10 1 "X:\Old Server\SA\nmr"

SA-500-122

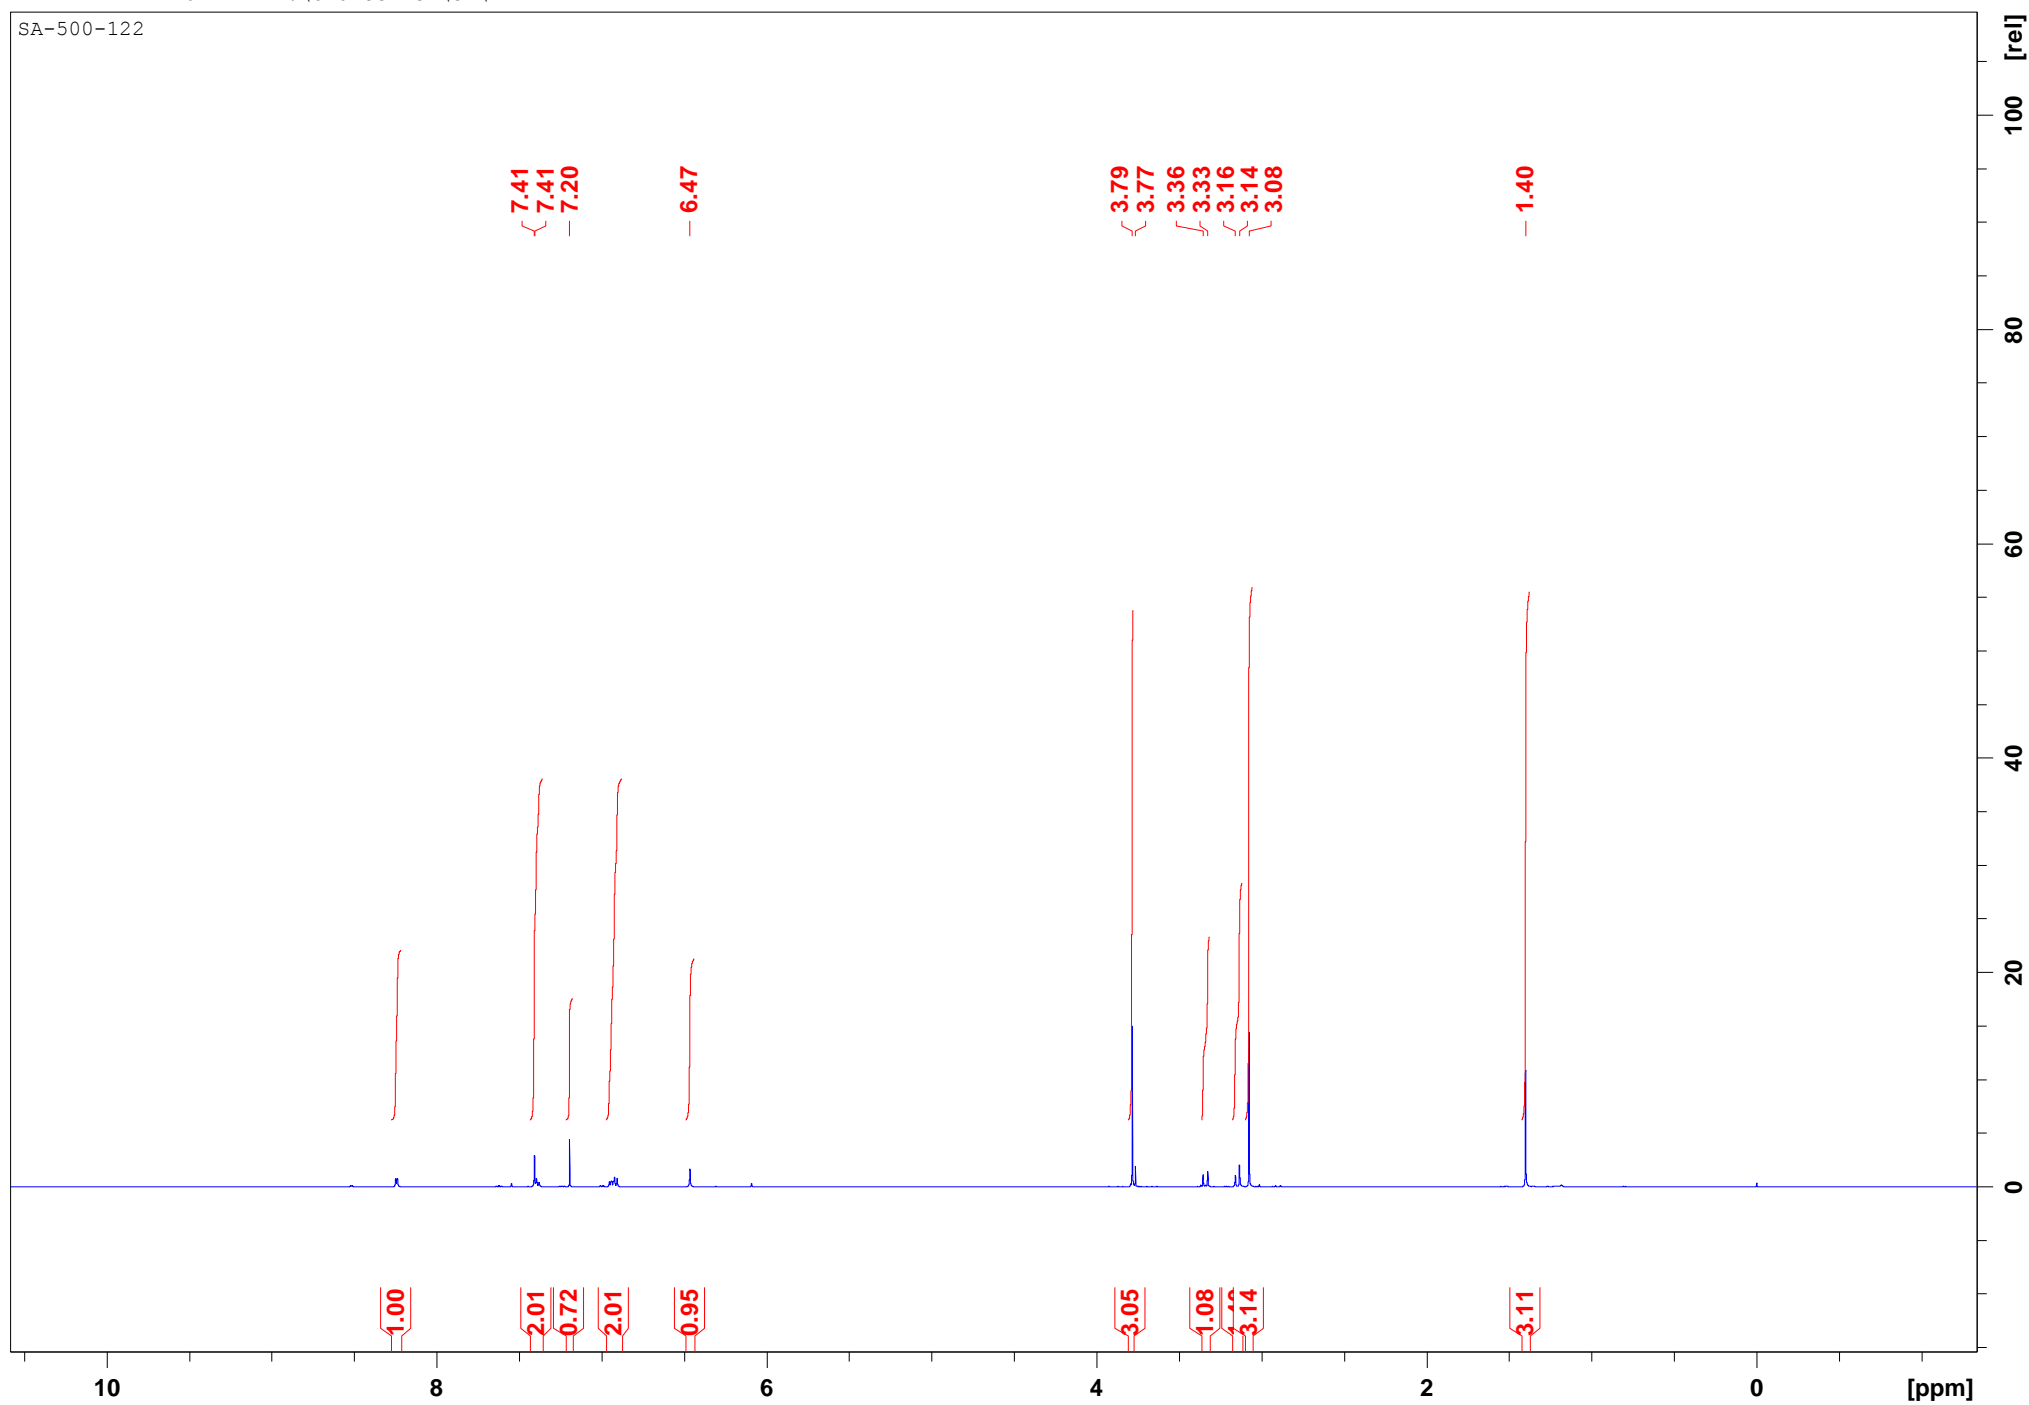

21b

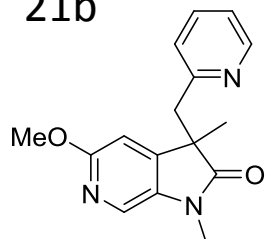

SA-500-122 24 1 "X:\Old Server\SA\nmr"

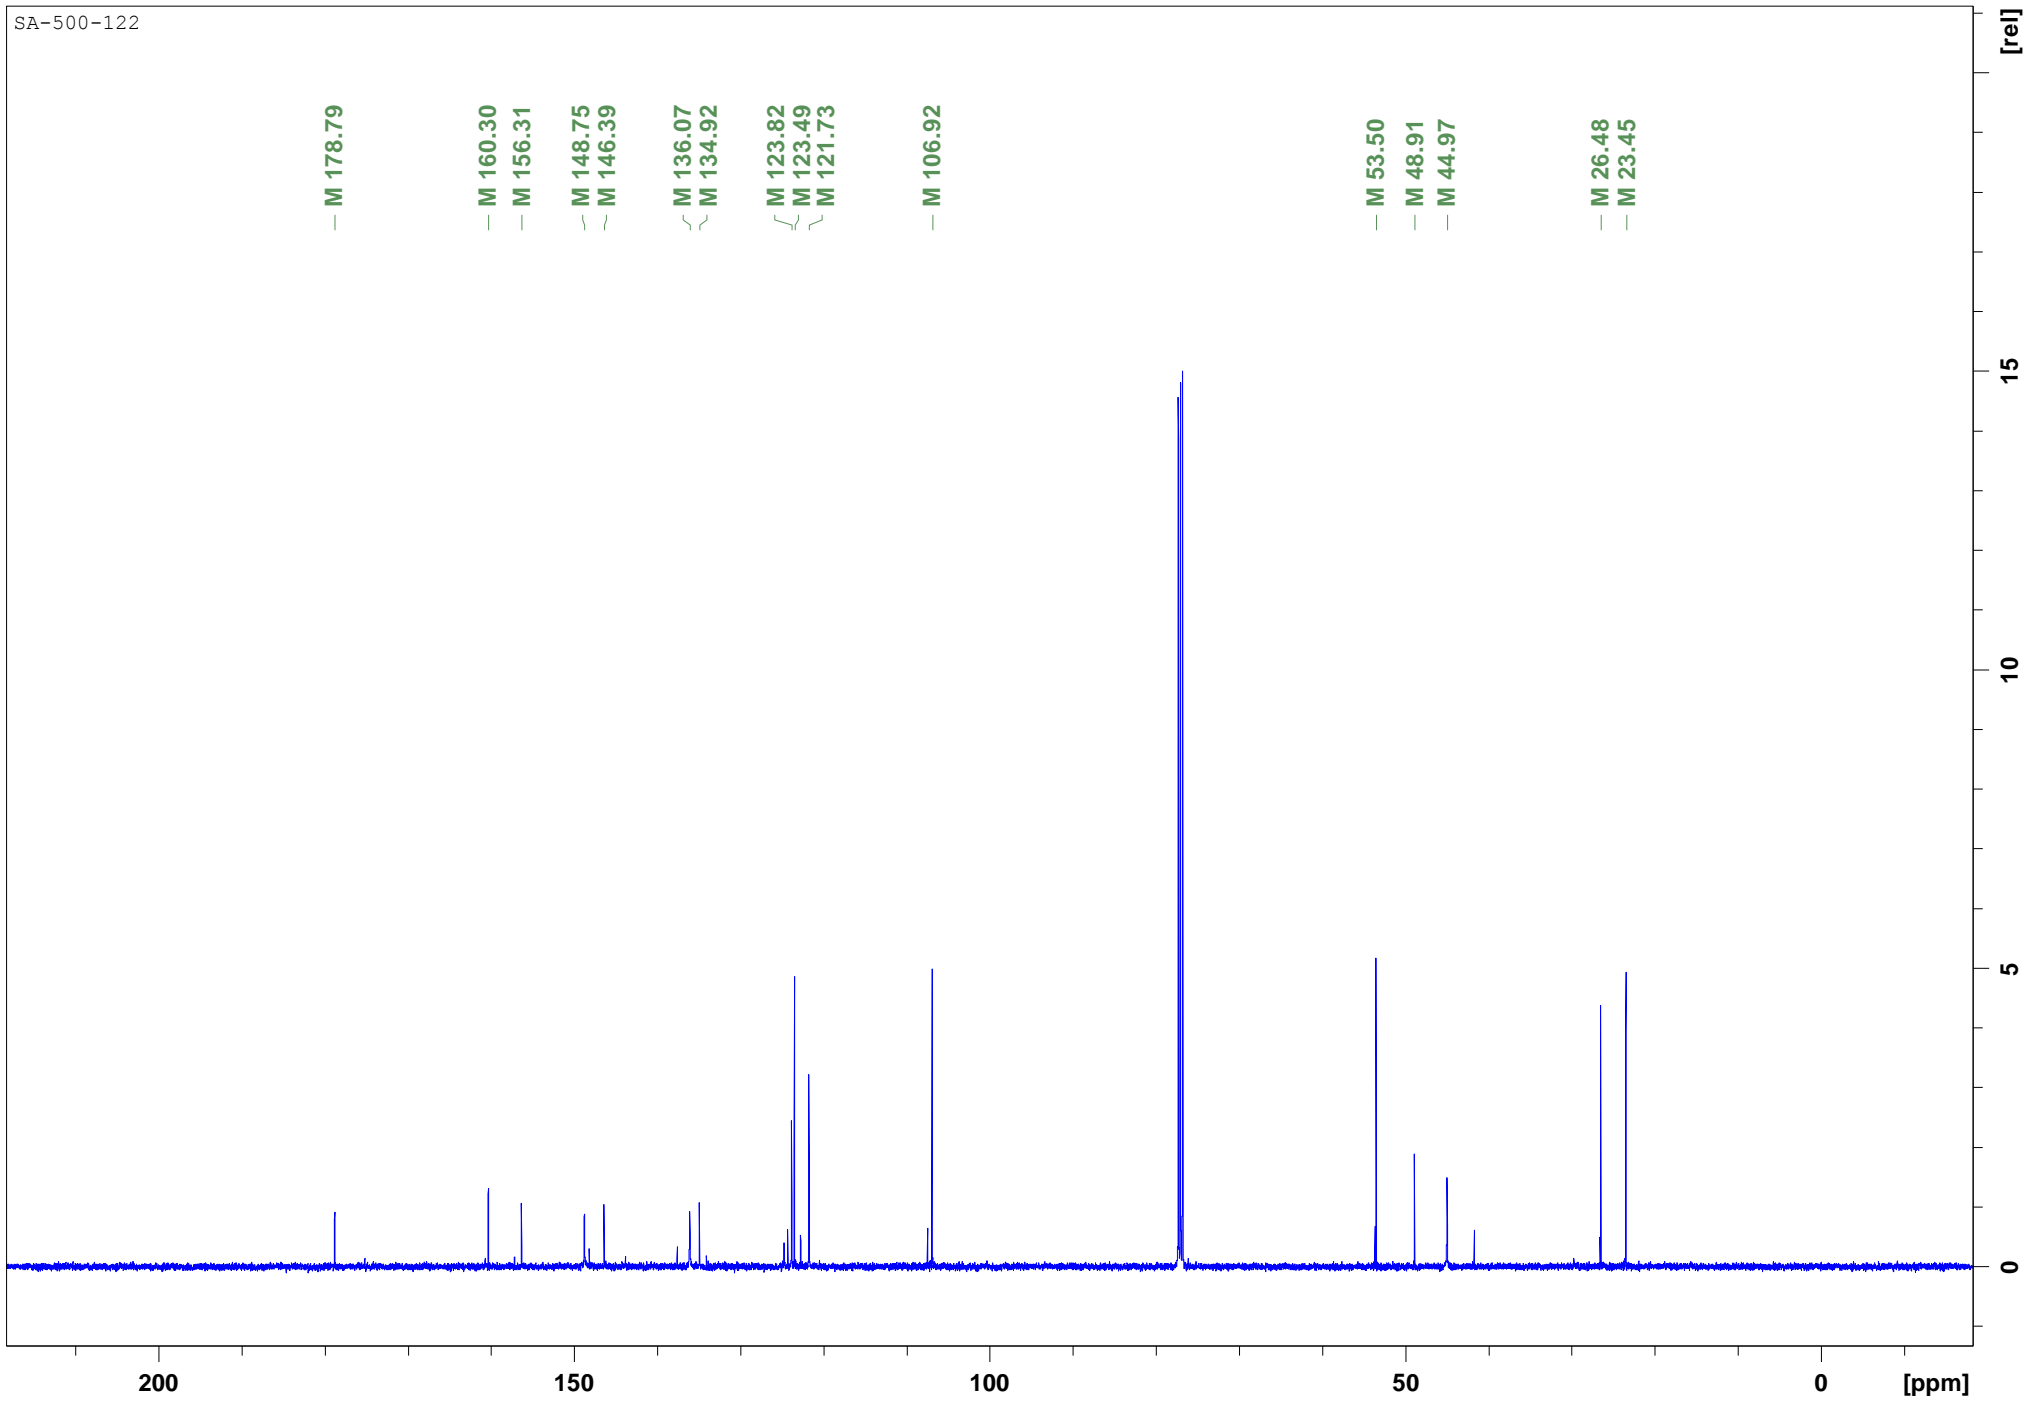

21c

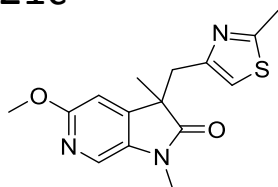

SH-493-233A 10 1 "X:\Old Server\SH\nmr"

SH-493-233A

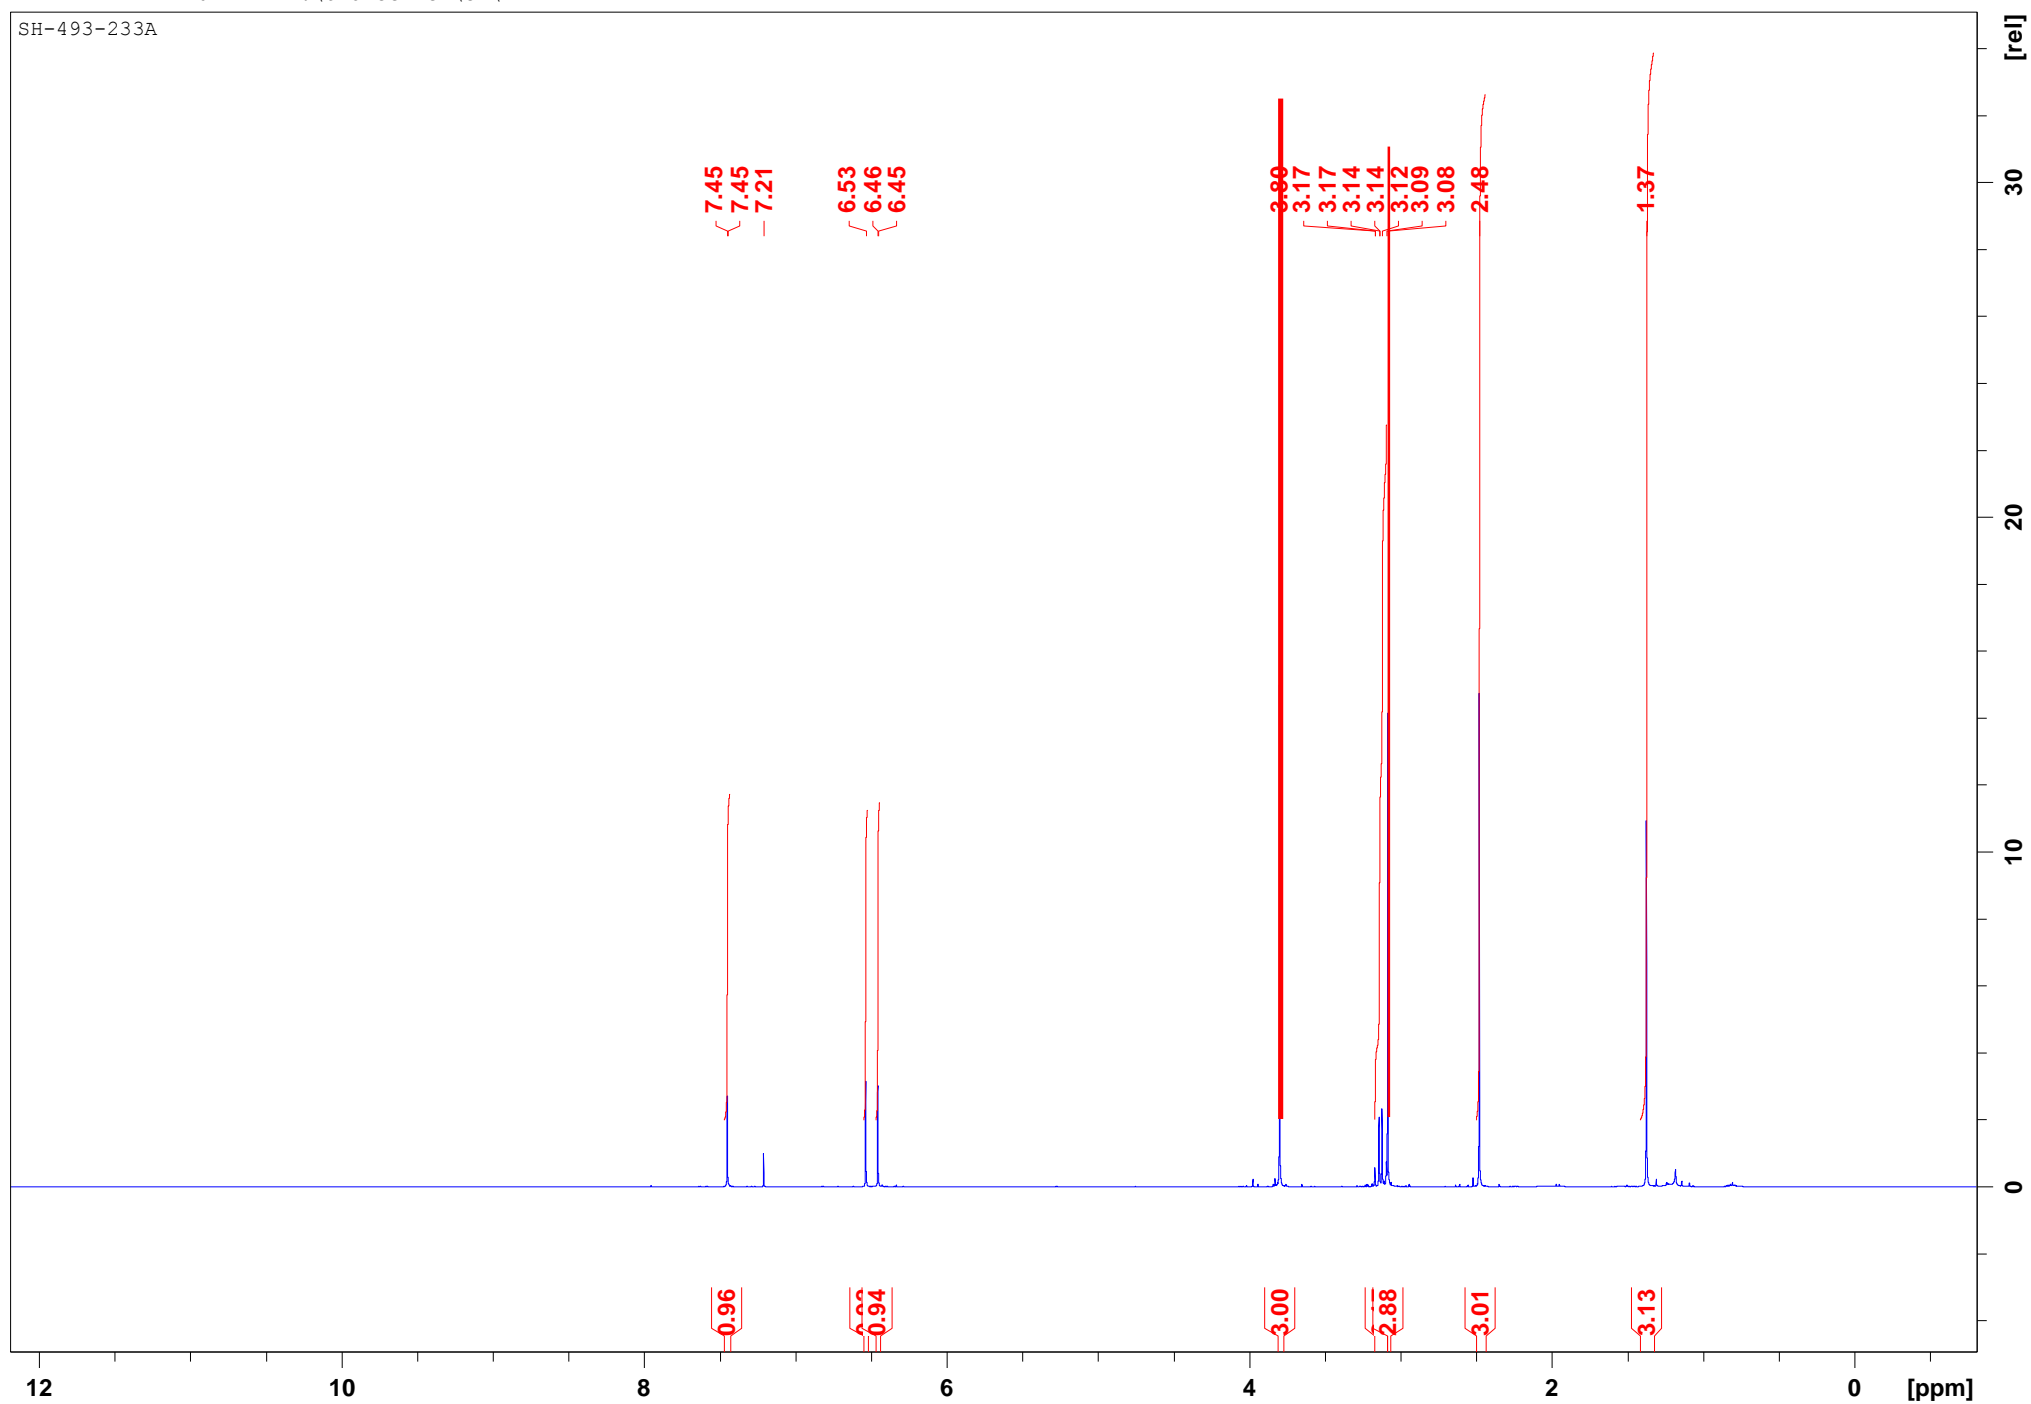

21c



SH-493-233A 11 1 "X:\Old Server\SH\nmr"

SH-493-233A

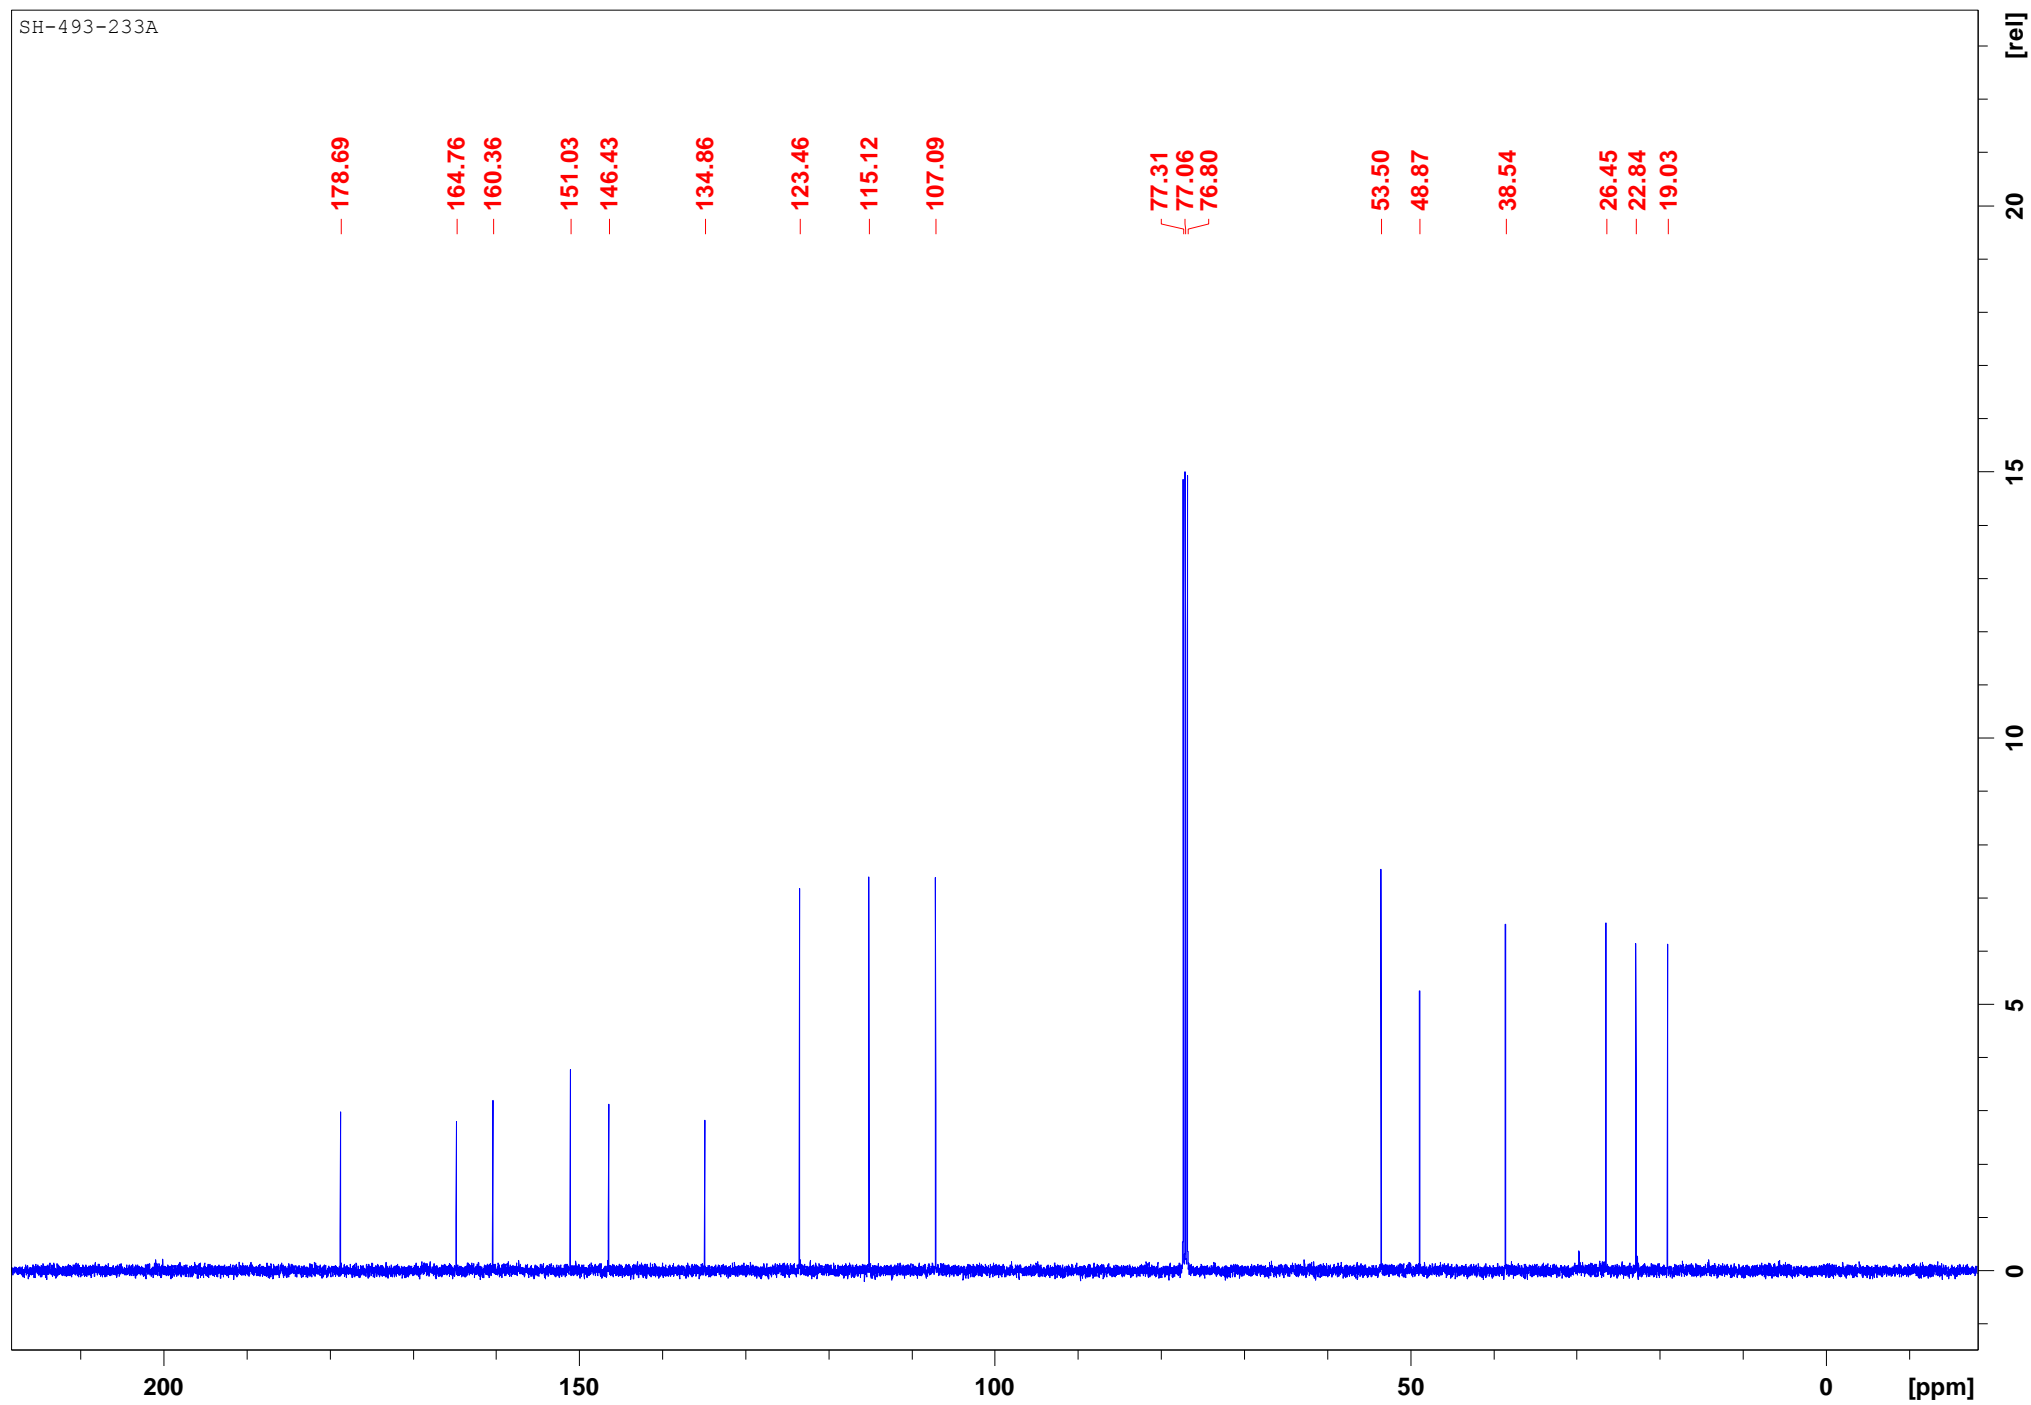

21d

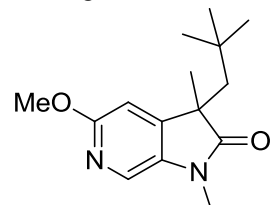

"DCM-494-229-A CDCL3" 10 1 X:\data\DCM\nmr

DCM-494-229-A CDCL3

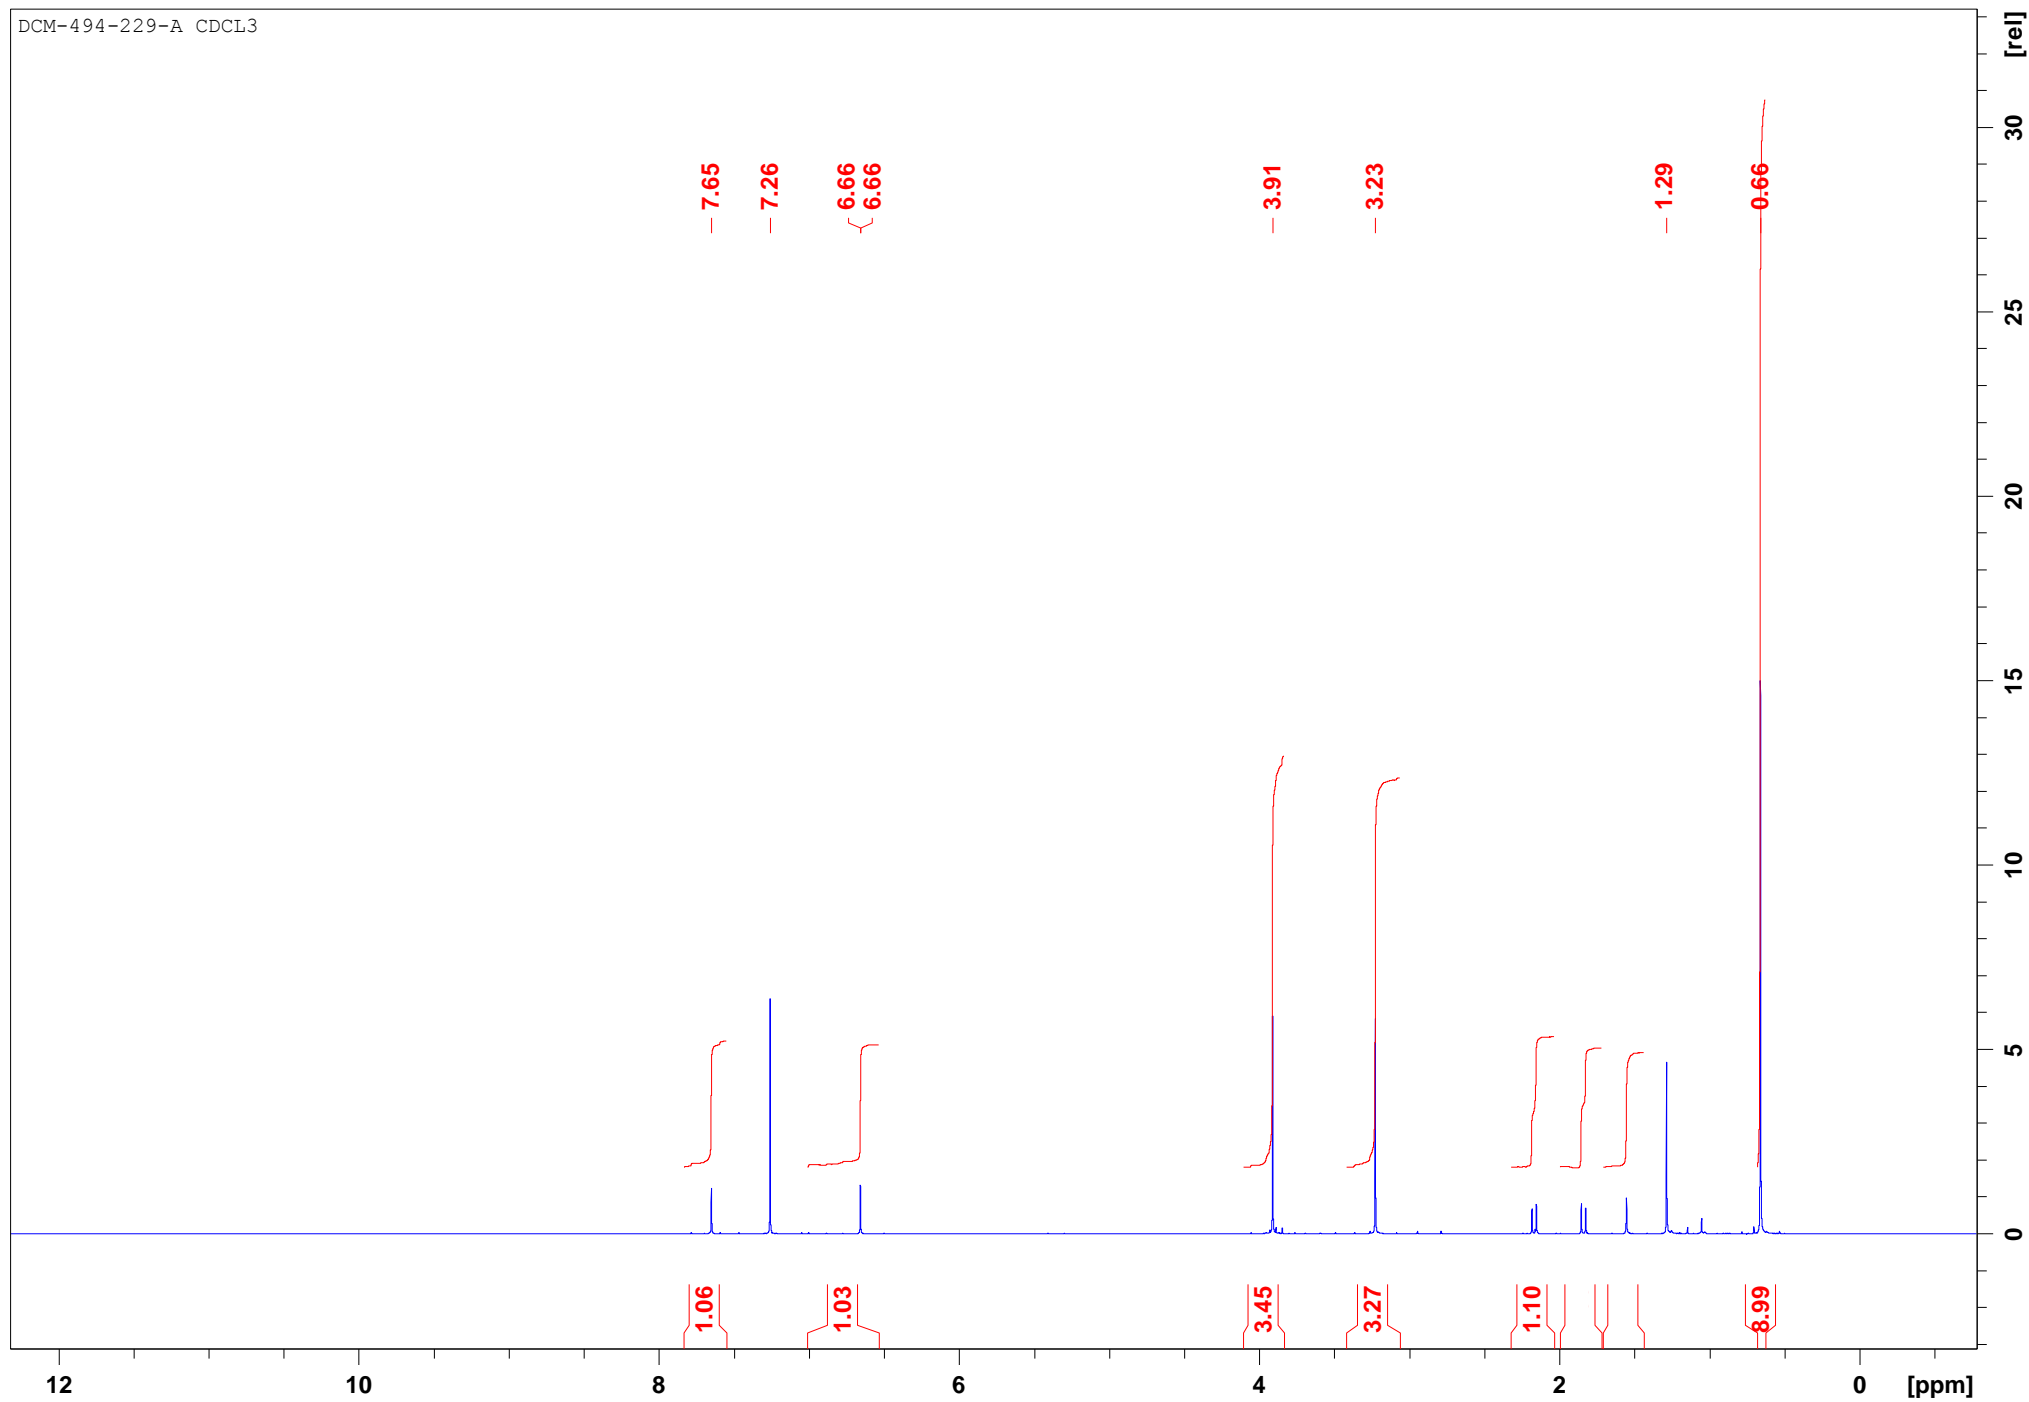



21d



"DCM-494-229-A CDCL3" 12 1 X:\data\DCM\nmr

DCM-494-229-A CDCL3

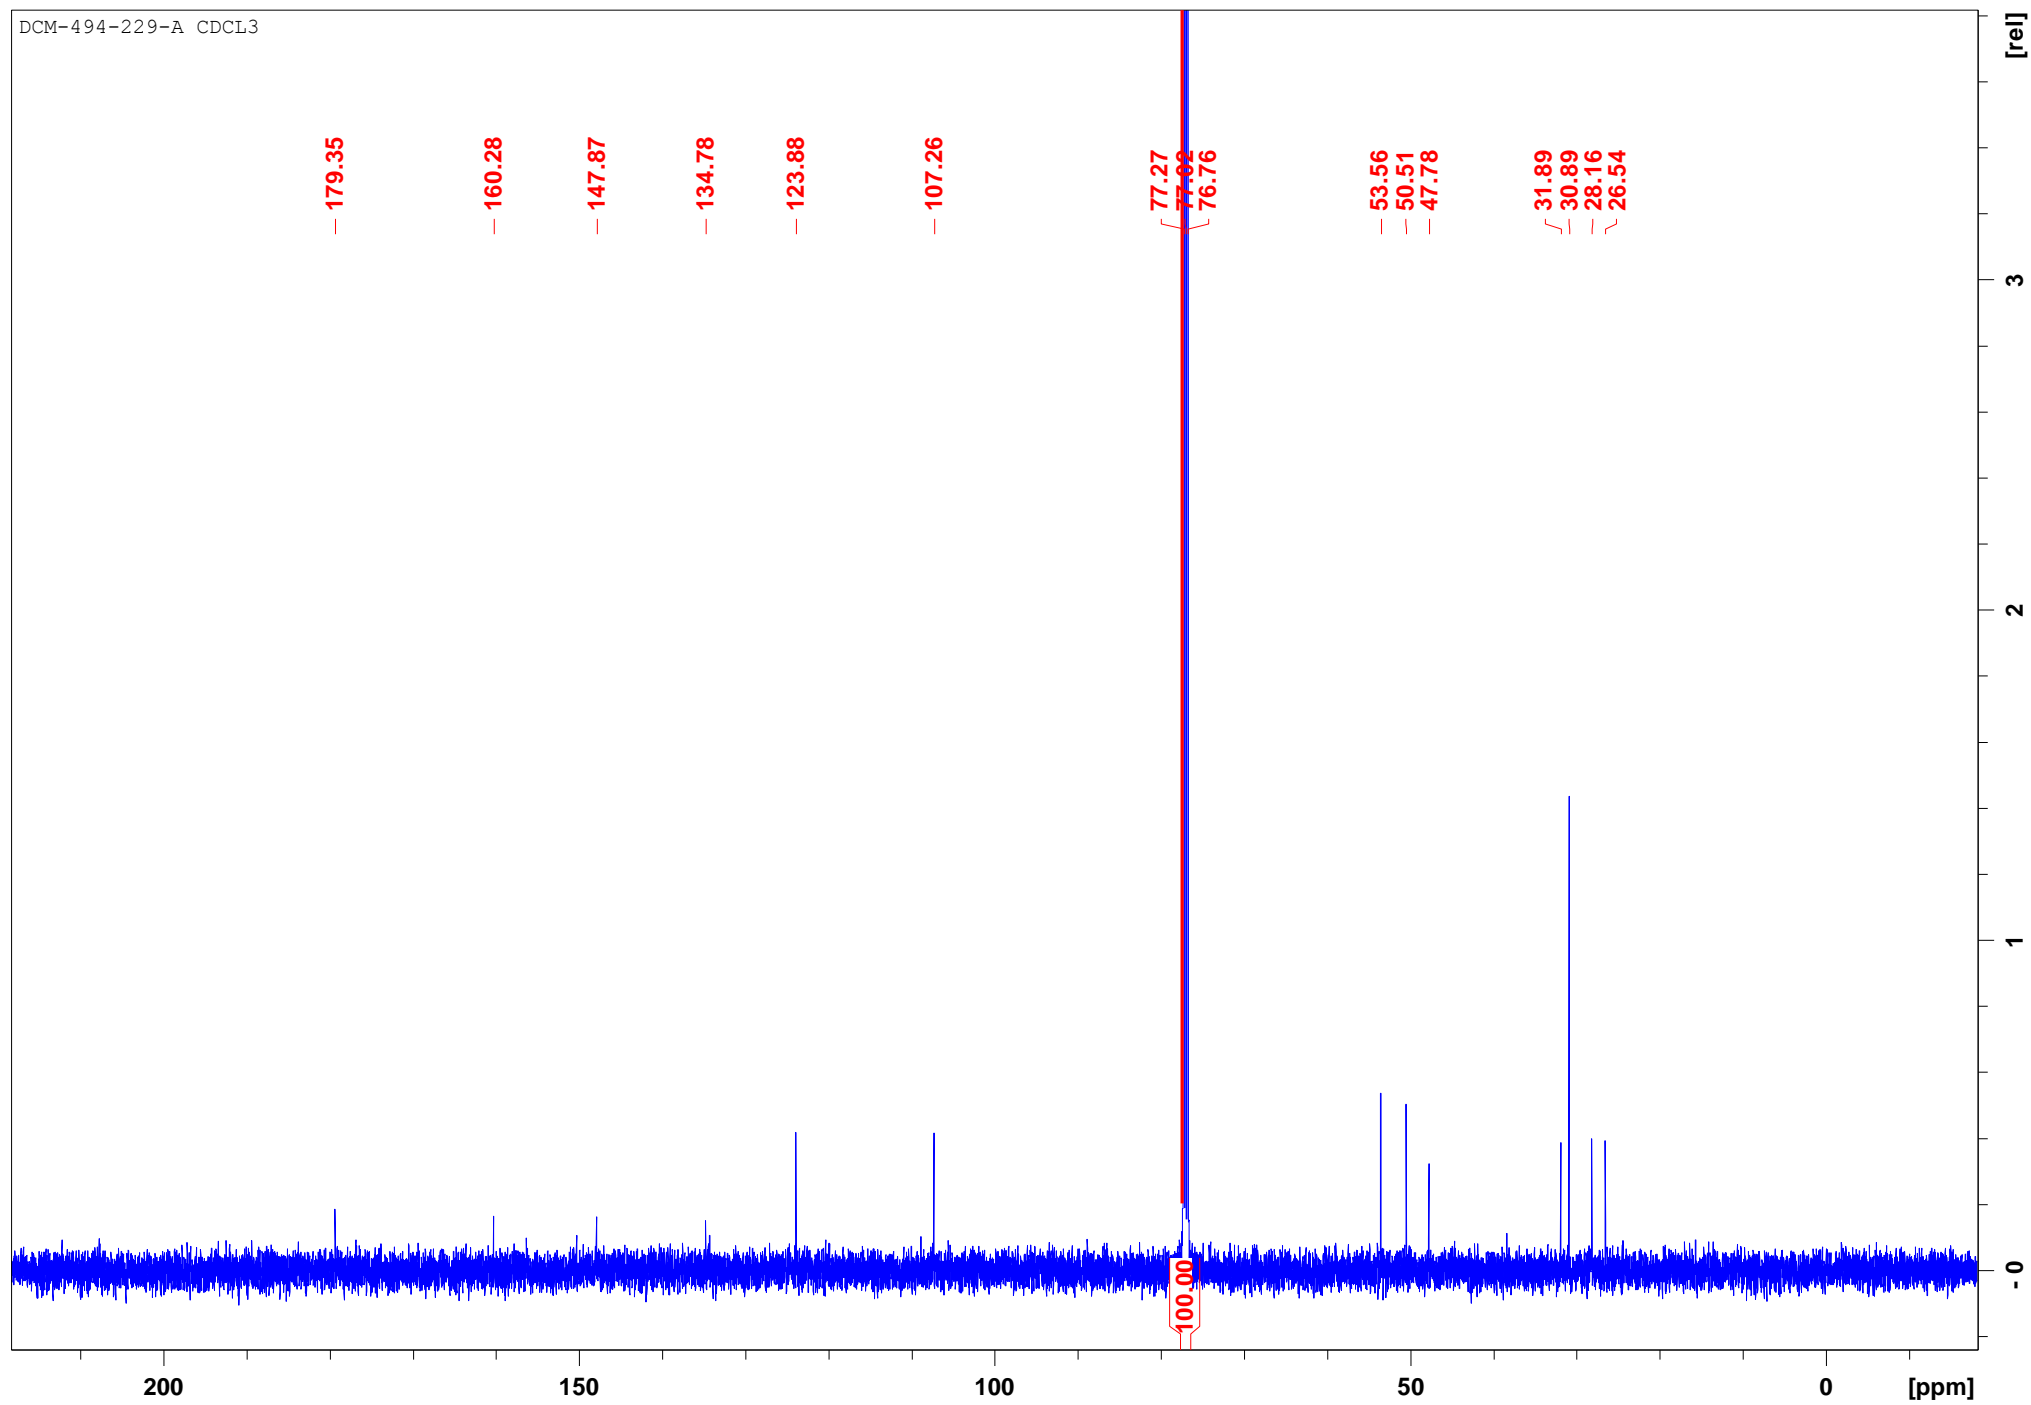

21e

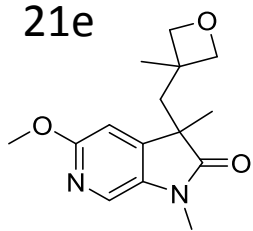

SA-500-156 10 1 "X:\Old Server\SA\nmr"

SA-500-156

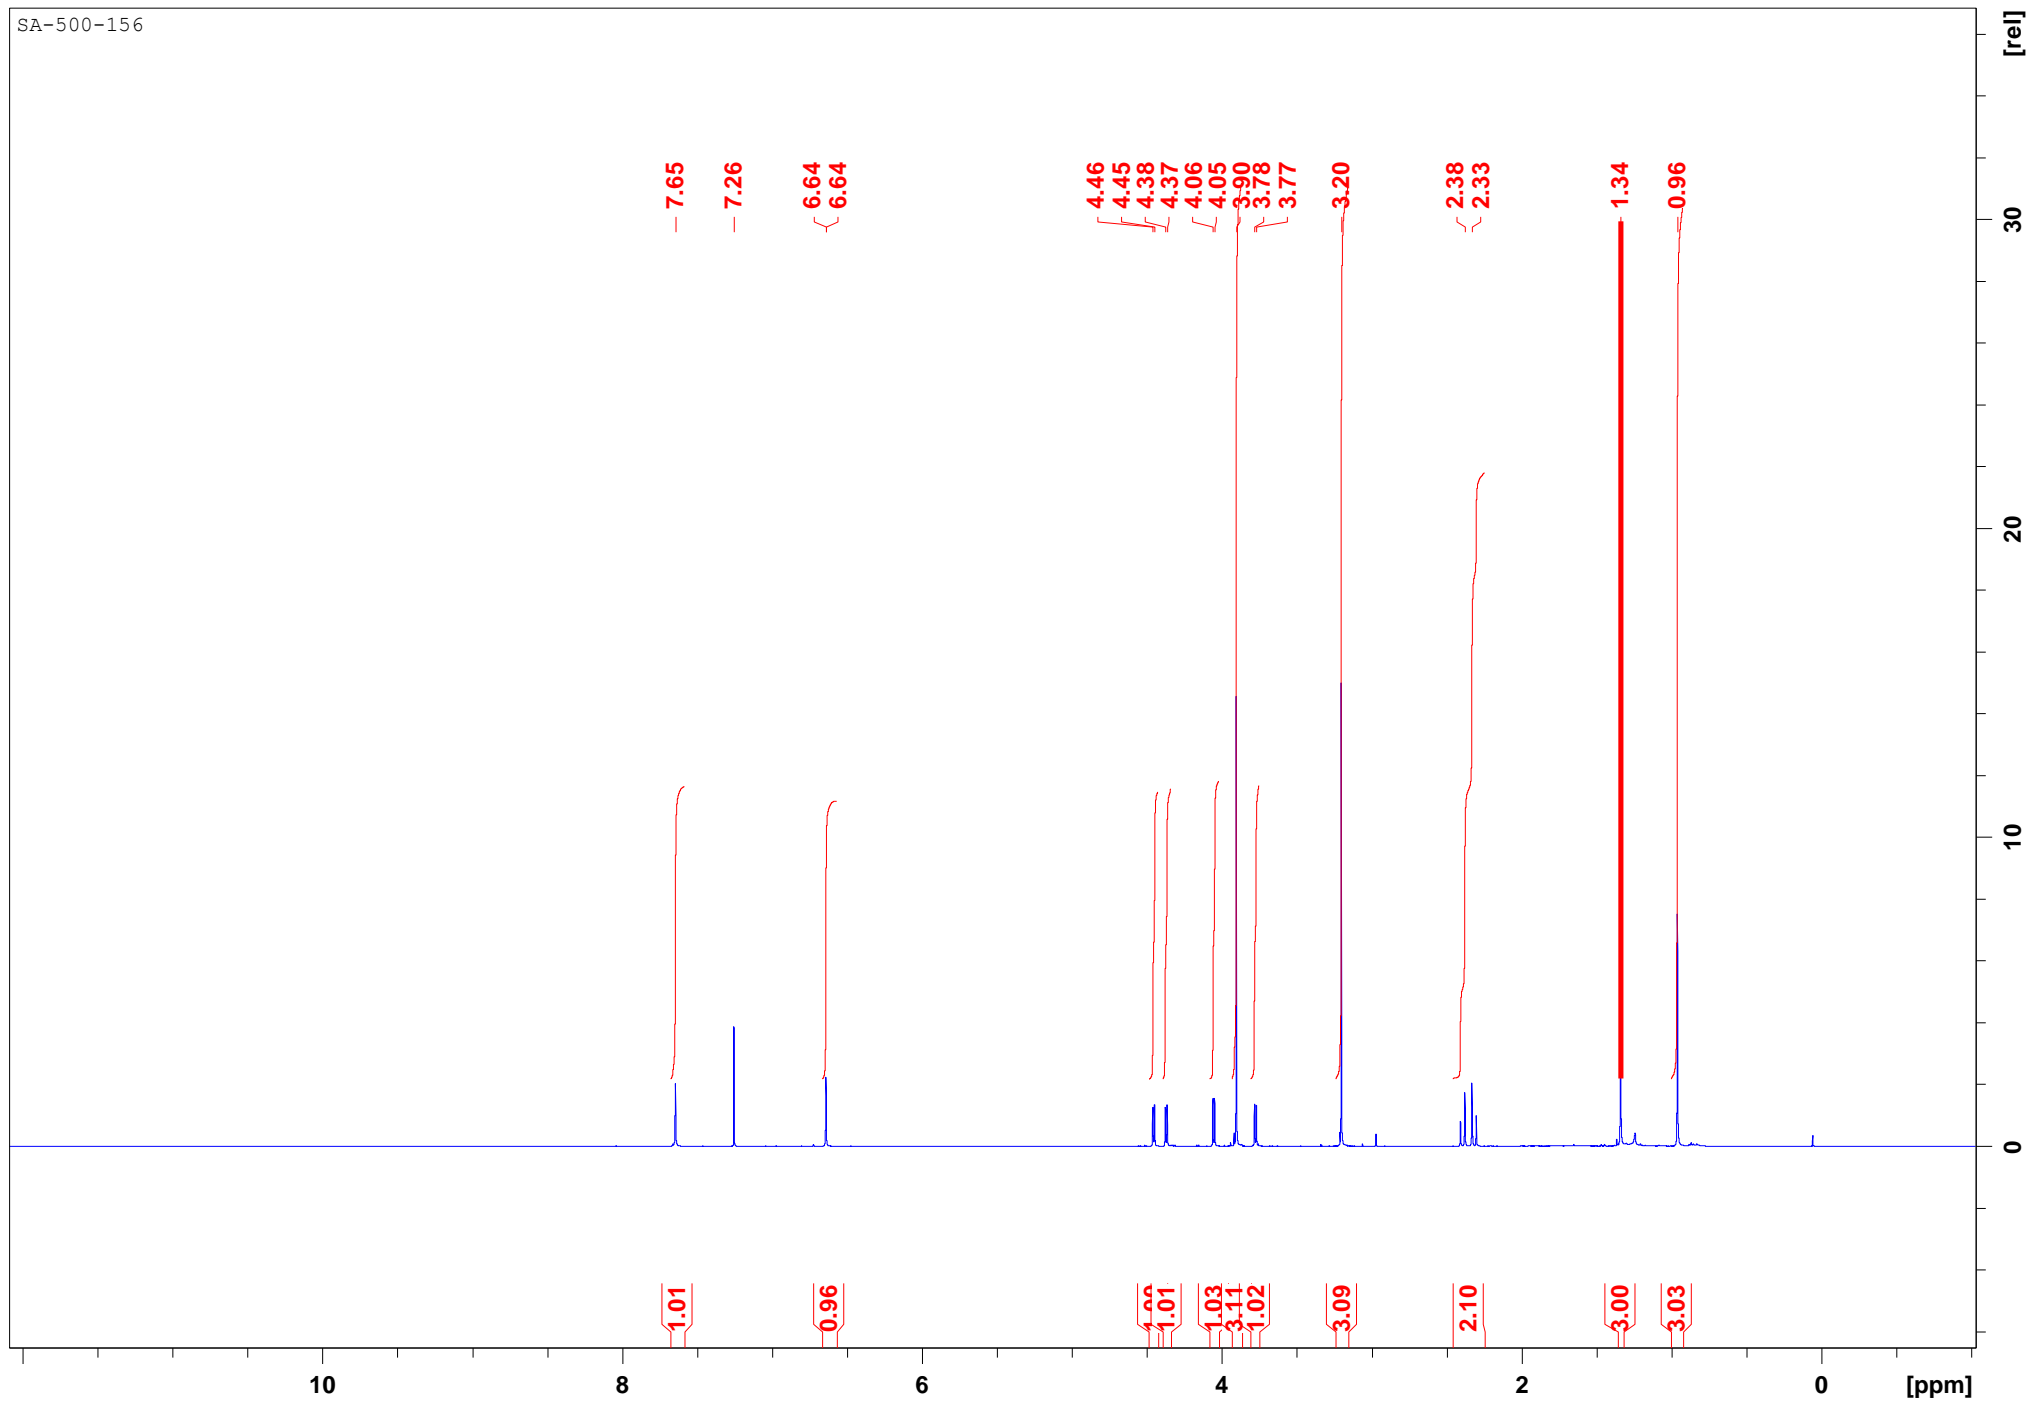

21e

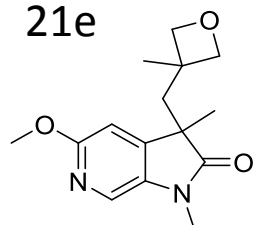

SA-500-156 11 1 "X:\Old Server\SA\nmr"

SA-500-156

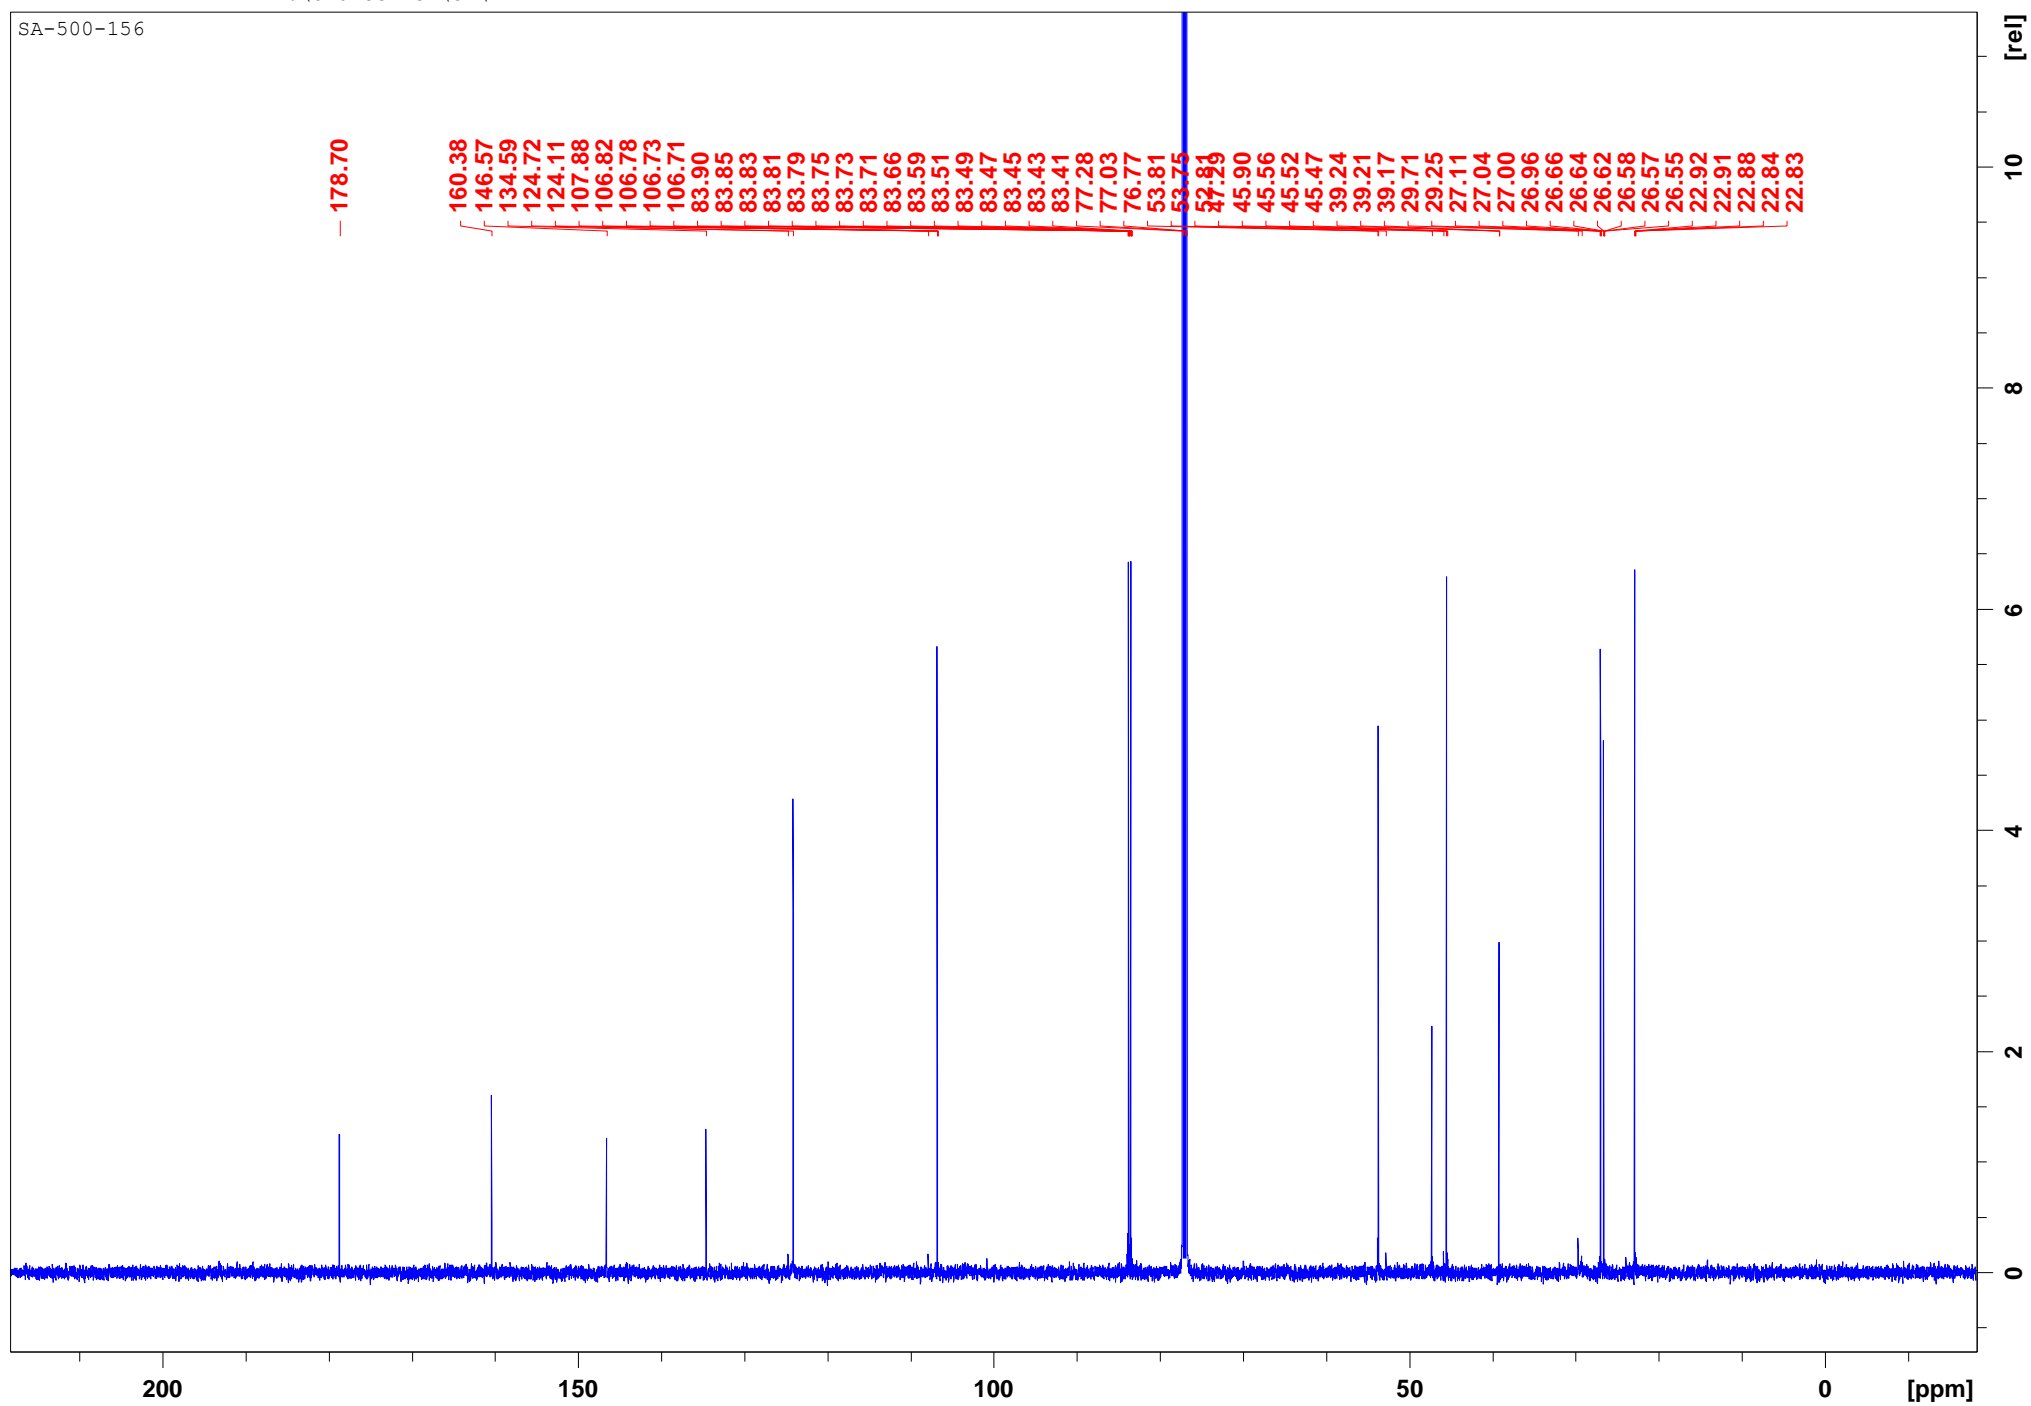

21f

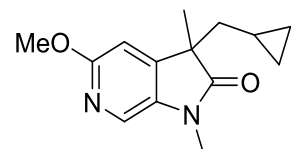

"DCM-494-200-D CDCL3" 10 1 "X:\Old Server\DCM\nmr"

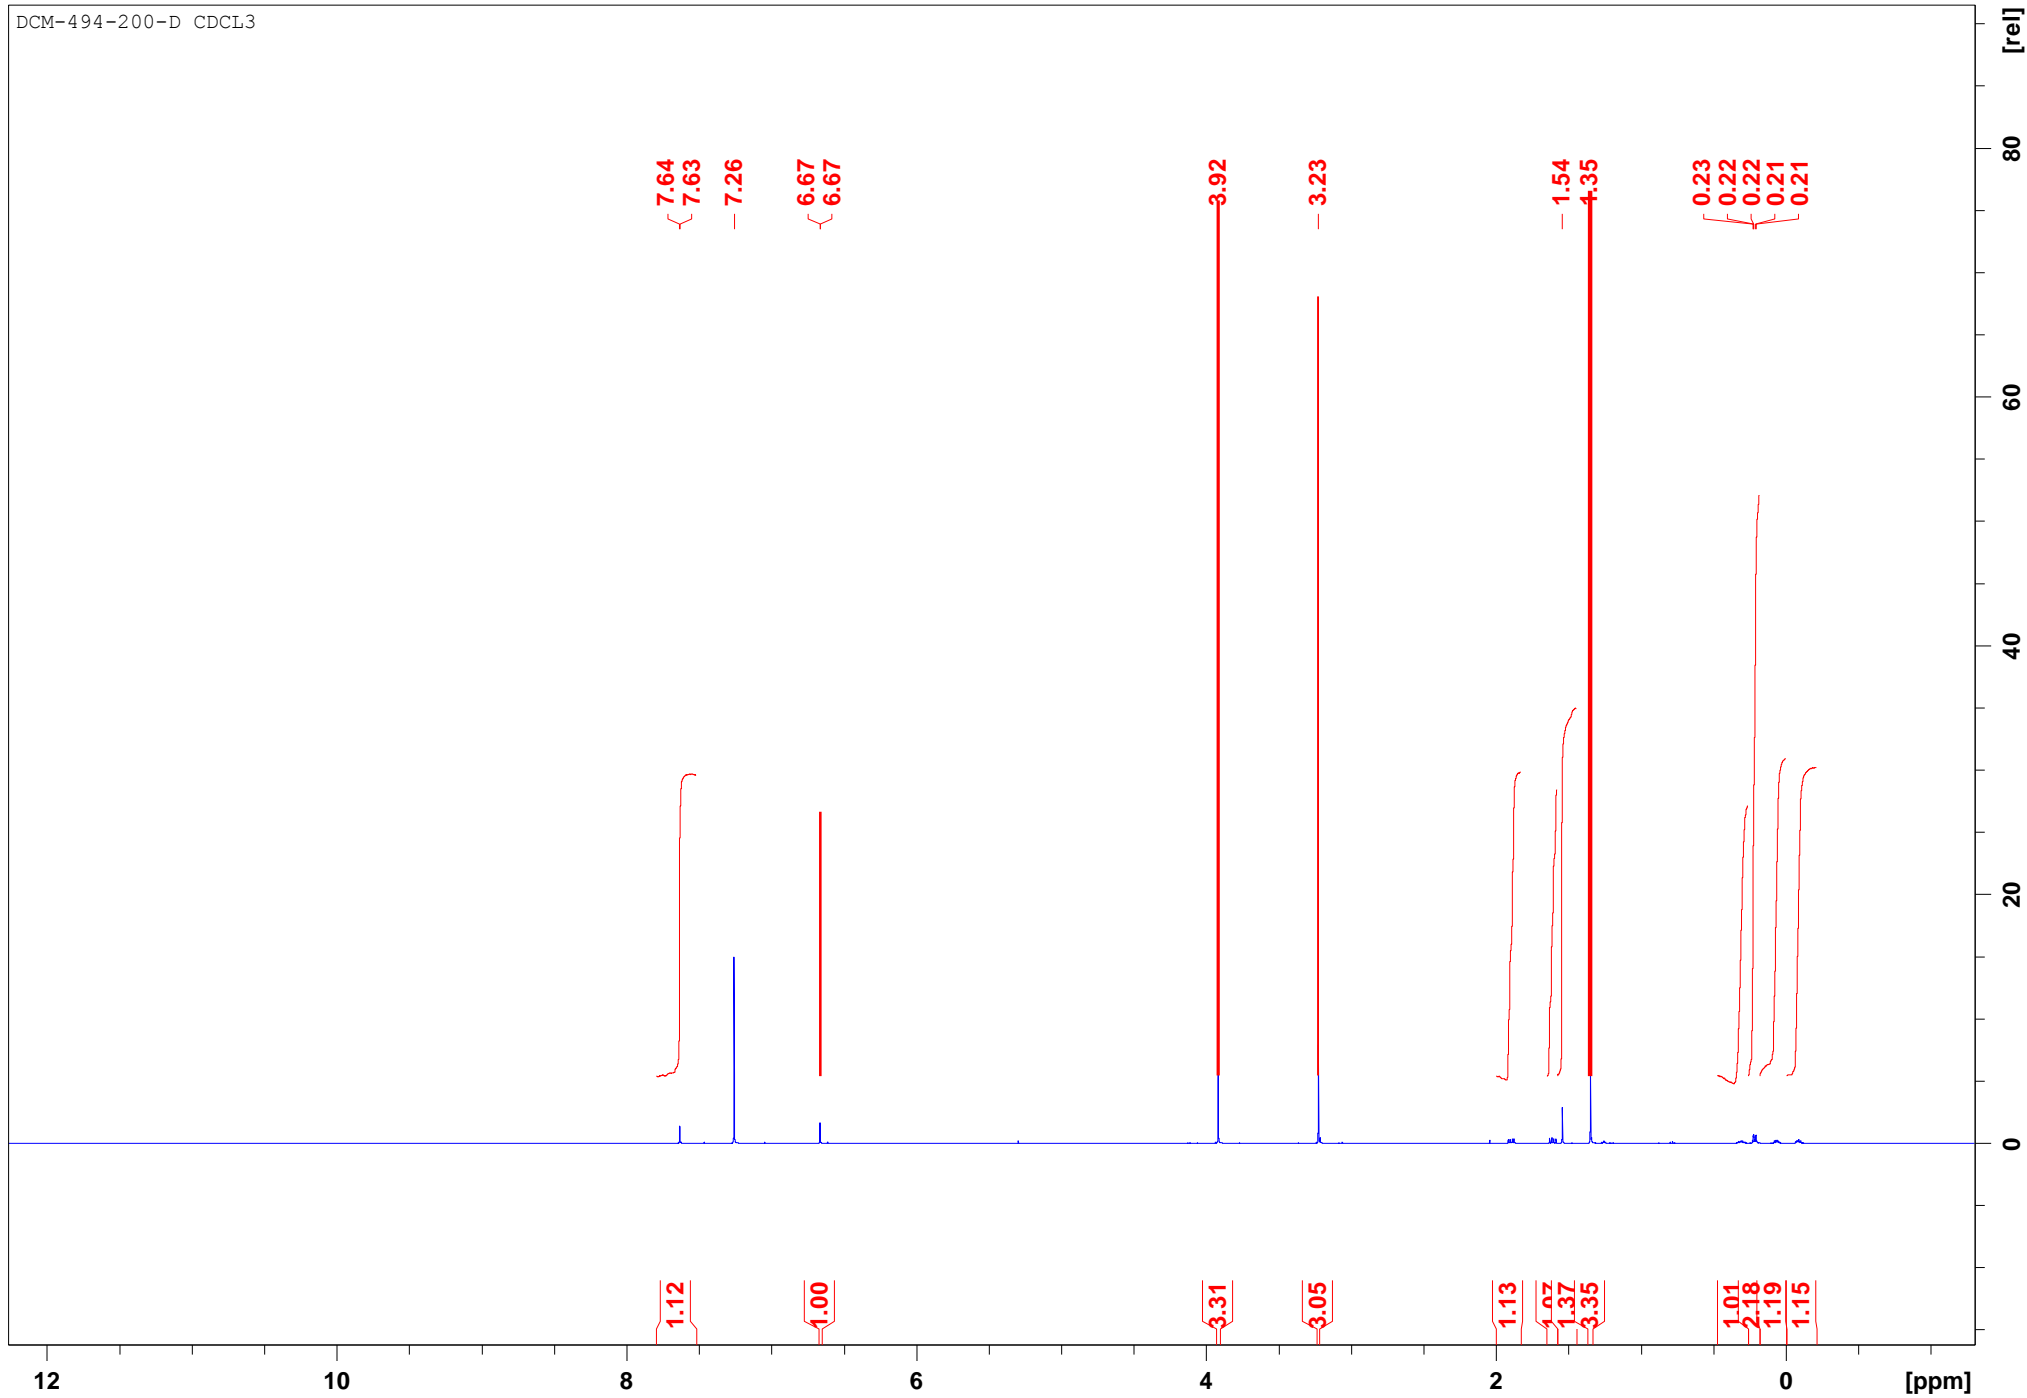

21f

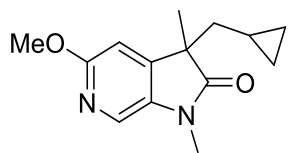

"DCM-494-200-A CDCl3" 20 1 "X:\Old Server\DCM\nmr"

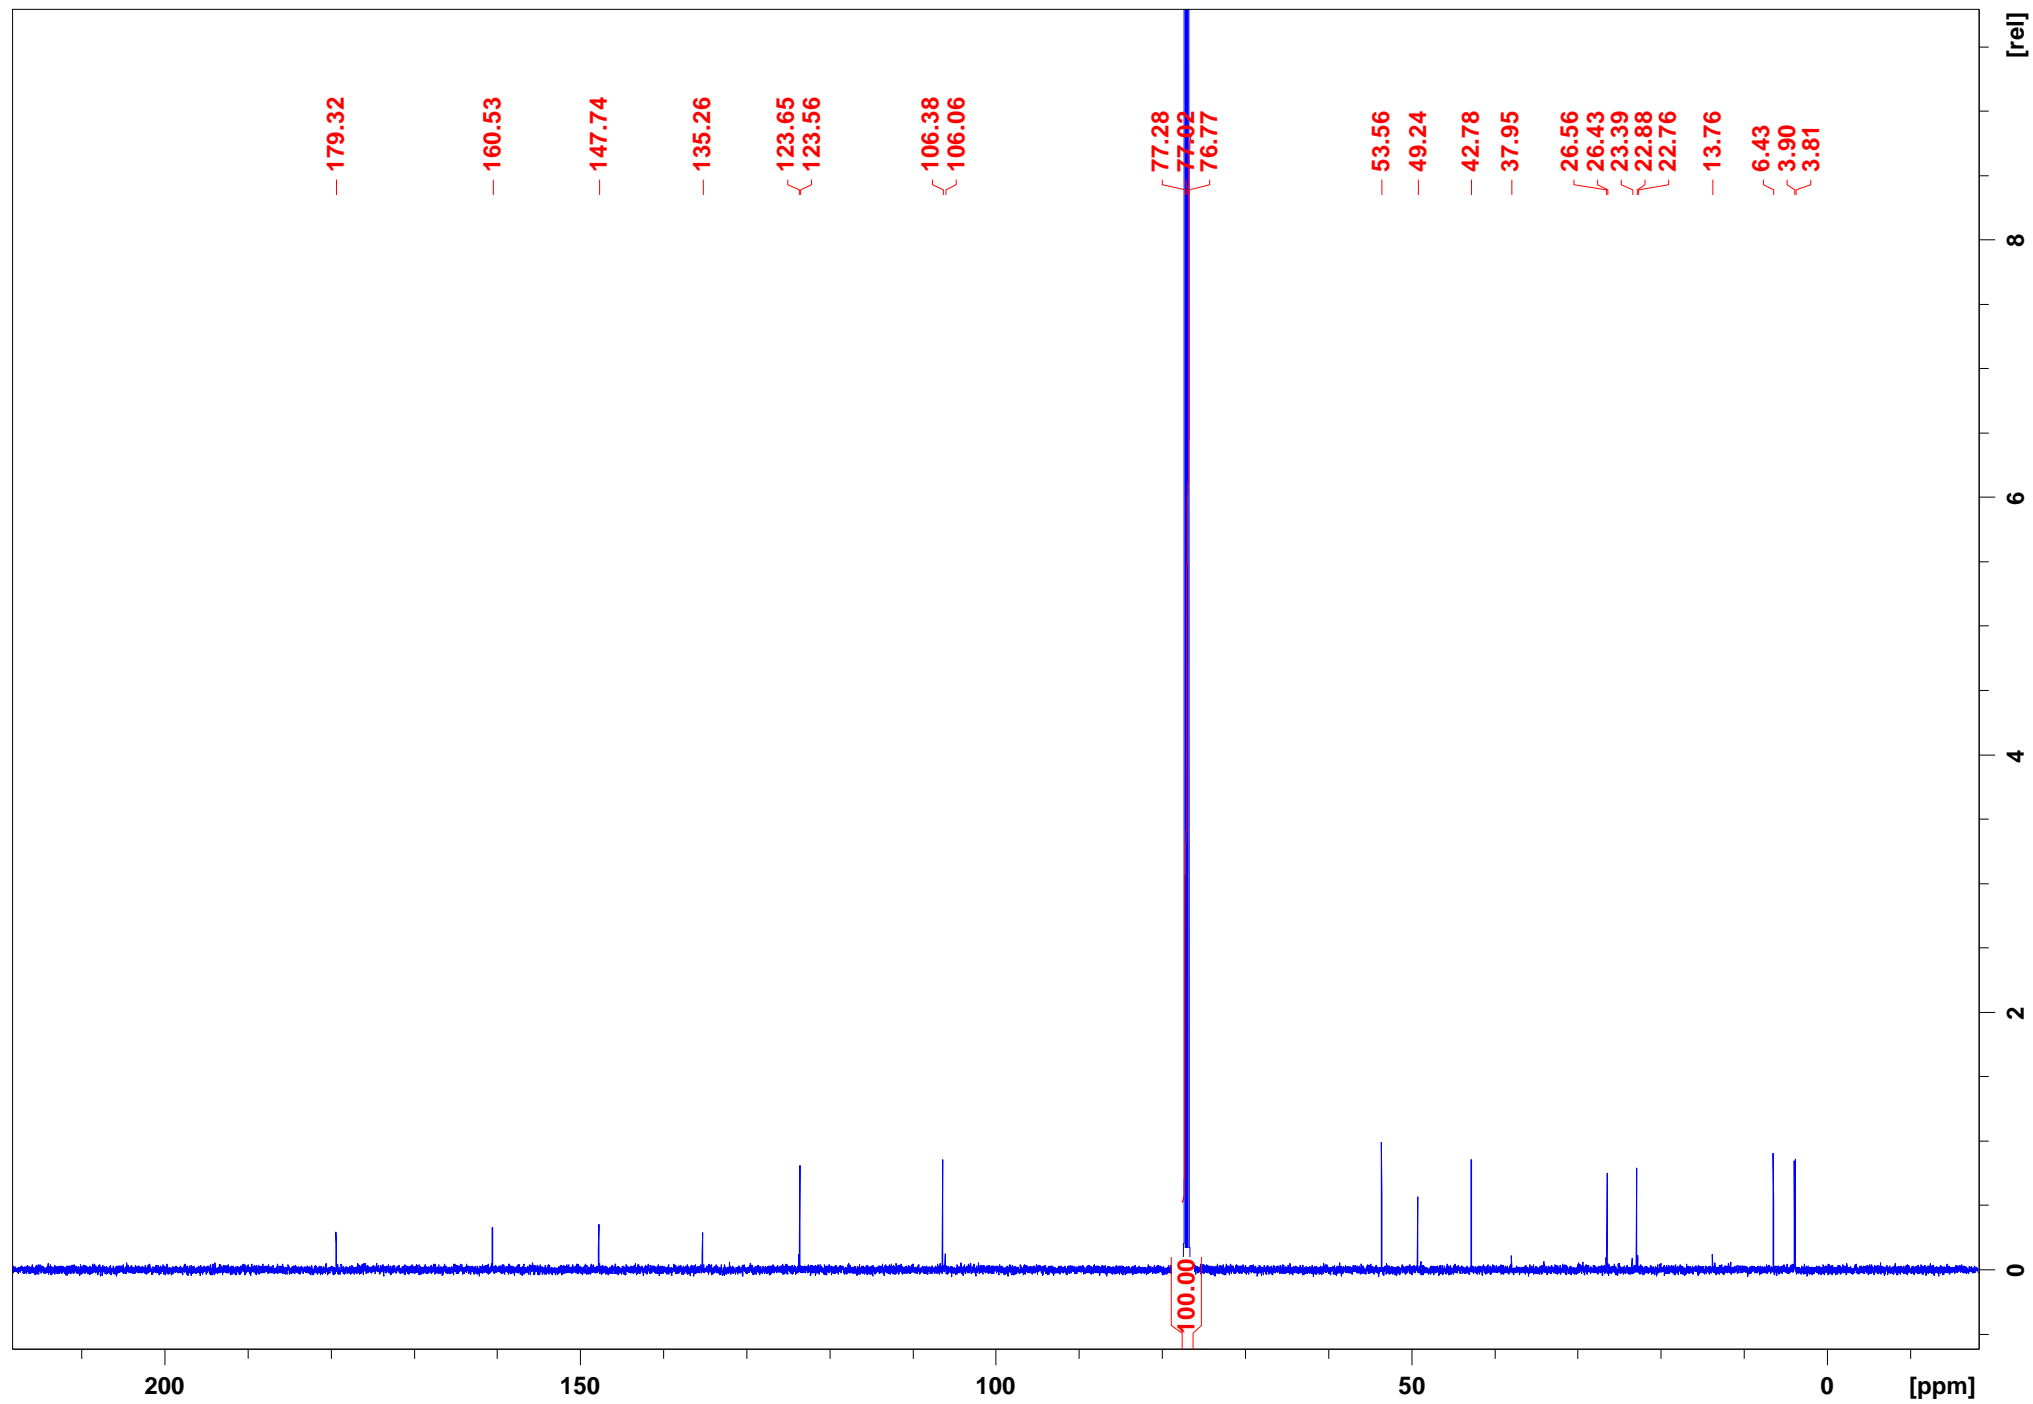

22a

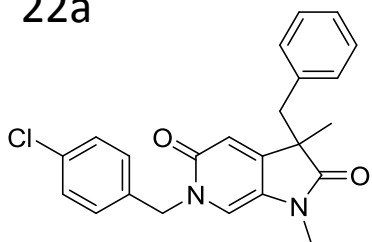

SA-500-136

7.307  
7.291  
7.260  
7.123  
7.107  
7.090  
6.969  
6.966  
6.954  
6.951  
6.587  
6.340

5.053  
5.025

3.239  
3.213  
2.916  
2.890  
2.818

1.488

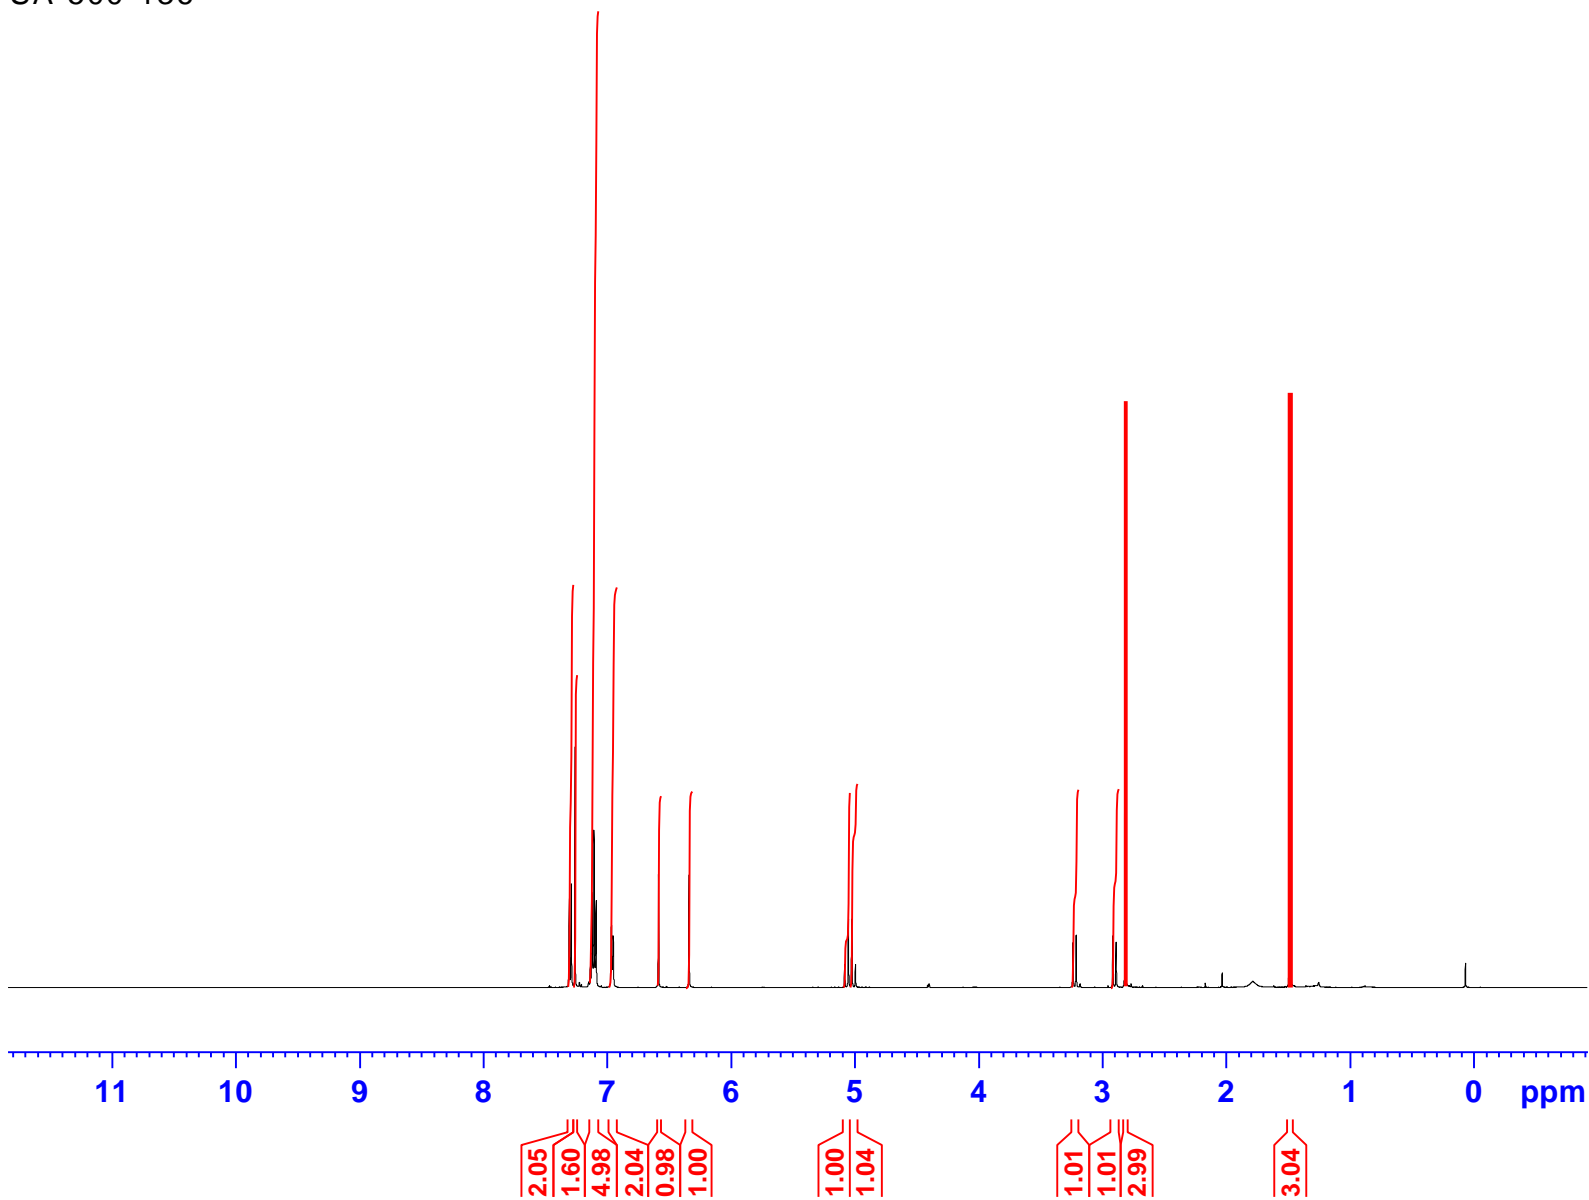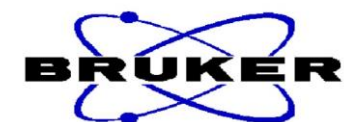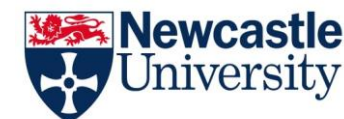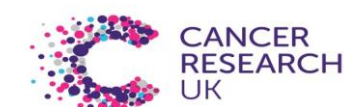

Current Data  
Name SA-500-136-DRIED  
EXPNO 10  
PROCNO 1

F2 - Acquisition  
Data 20150317  
Time 17.13  
INSTRUM spect  
PROBHD 5 mm PABBO BB-  
PULPROG zg30  
TD 65536  
SOLVENT CDCl3  
NS 16  
DS 0  
SWH 10330.578 Hz  
FIDRES 0.157632 Hz  
AQ 3.1719425 sec  
RG 512  
DW 48.400 usec  
DE 11.99 usec  
TE 296.9 K  
D1 1.0000000 sec  
TD0 1

==== CHANNEL f1 =====  
SFO1 500.3030896 MHz  
NUC1 1H  
P1 16.25 usec  
PLW1 18.33600044 W

F2 - Processing parameters SI  
65536  
SF 500.3000120 MHz  
WDW EM  
SSB 0  
LB 0.30 Hz  
GB 0  
PC 1.00

22a

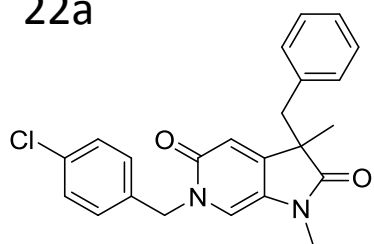

SA-500-136

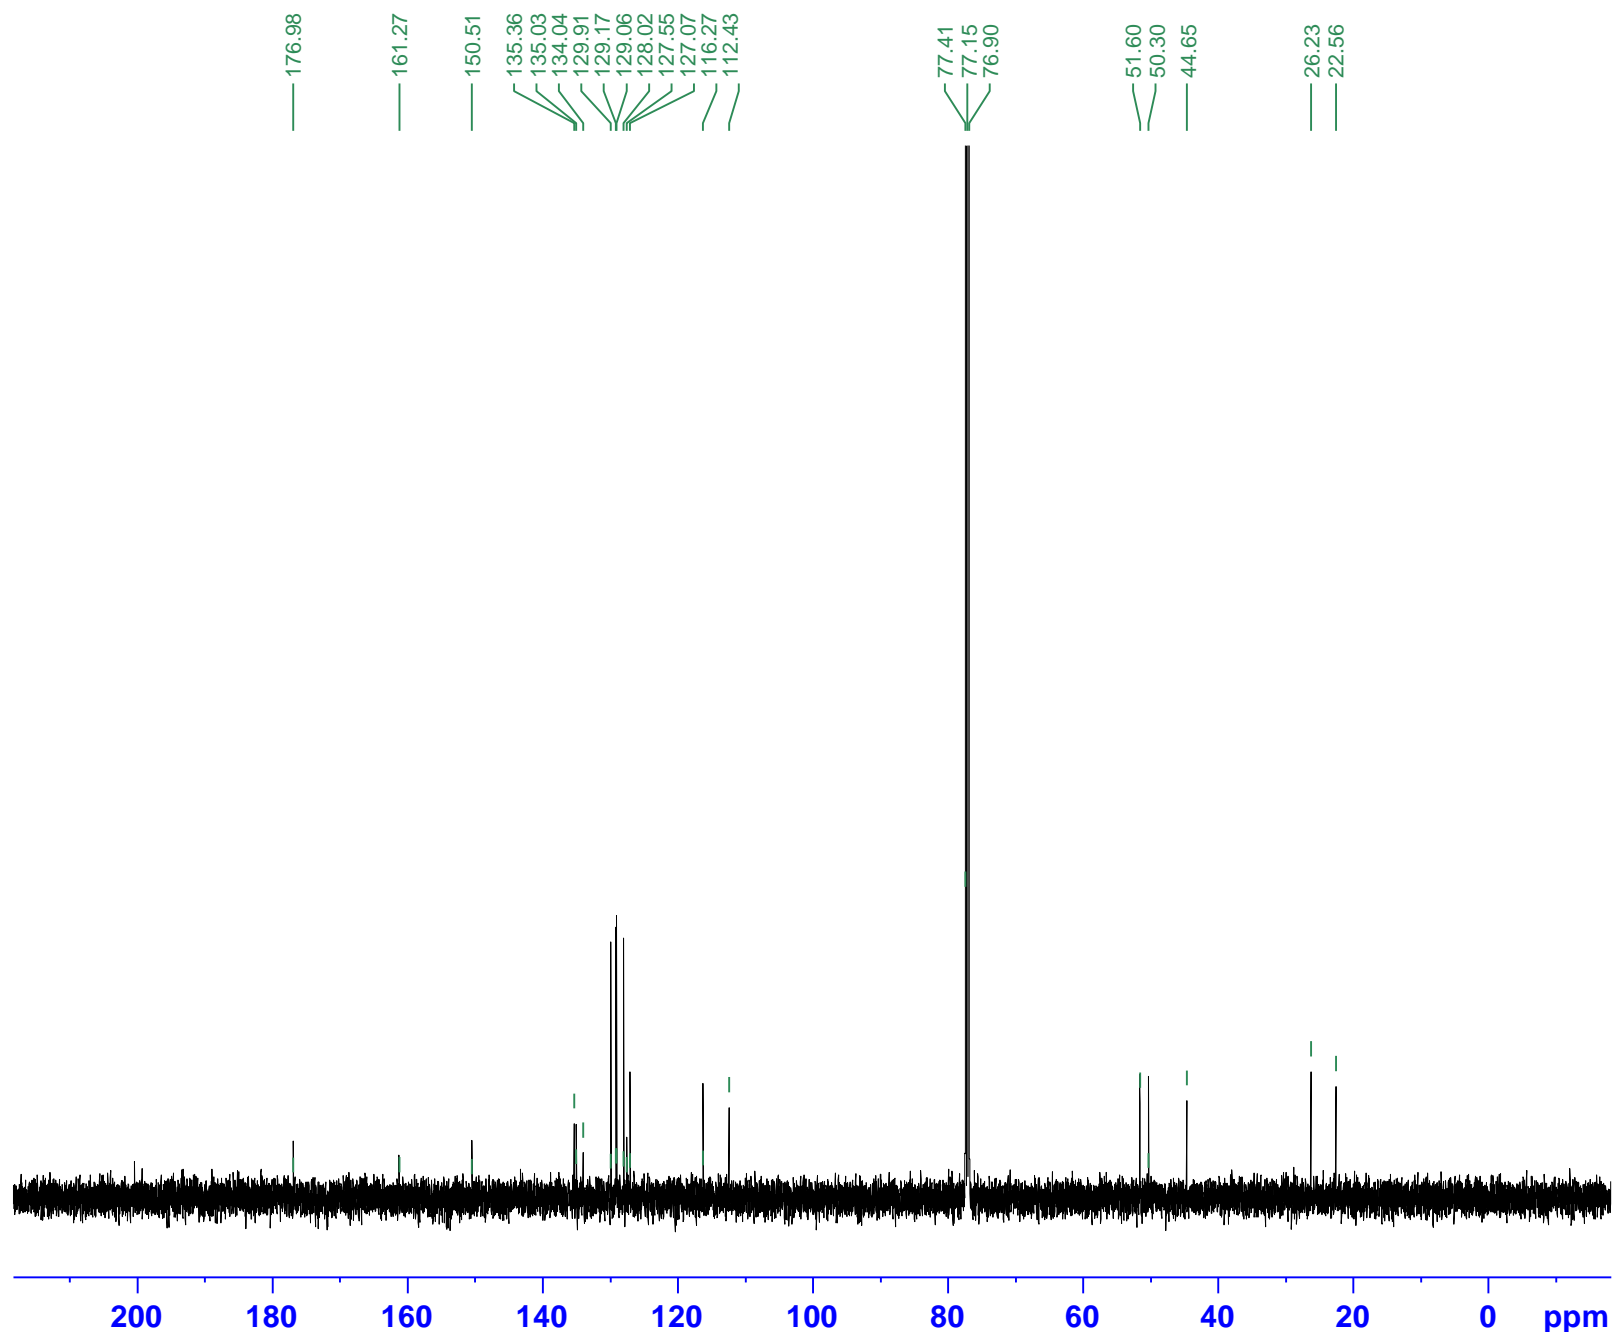

Current Data Parameters  
 NAME SA-500-136-DRIED  
 EXPNO 11  
 PROCNO 1

F2 - Acquisition  
 Parameters Date\_ 20150318  
 Time 1.50  
 INSTRUM spect  
 PROBHD 5 mm PABBO BB-  
 PULPROG zgpg30  
 TD 65536  
 SOLVENT CDCl3  
 NS 256  
 DS 2  
 SWH 29761.904 Hz  
 FIDRES 0.454131 Hz  
 AQ 1.1010048 sec  
 RG 456  
 DW 16.800 usec  
 DE 7.68 usec  
 TE 297.0 K  
 D1 2.00000000 sec  
 D11 0.03000000 sec  
 TD0 1

===== CHANNEL f1 =====

SFO1 125.8131151 MHz  
 NUC1 13C  
 P1 9.75 usec  
 PLW1 82.38999939 W

===== CHANNEL f2 =====

SFO2 500.3020012 MHz  
 NUC2 1H  
 CPDPRG2 waltz16  
 PCPD2 80.00 usec  
 PLW2 18.33600044 W  
 PLW12 0.75654000 W  
 PLW13 0.48418999 W

F2 - Processing  
 Parameters 65536  
 SF 125.8005190 MHz  
 WDW EM  
 SSB 0  
 LB 1.00 Hz  
 GB 0  
 PC 1.20

22b

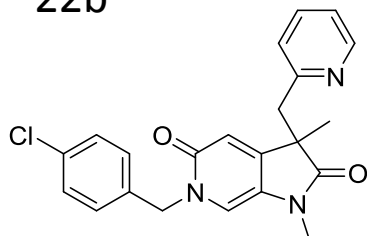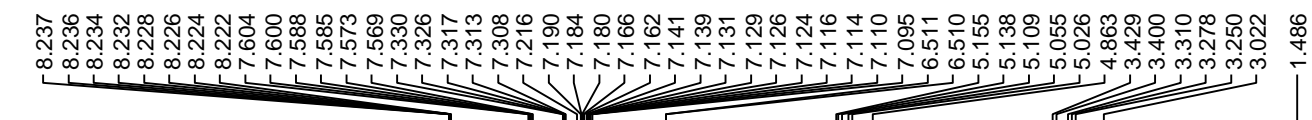

SA-500-128

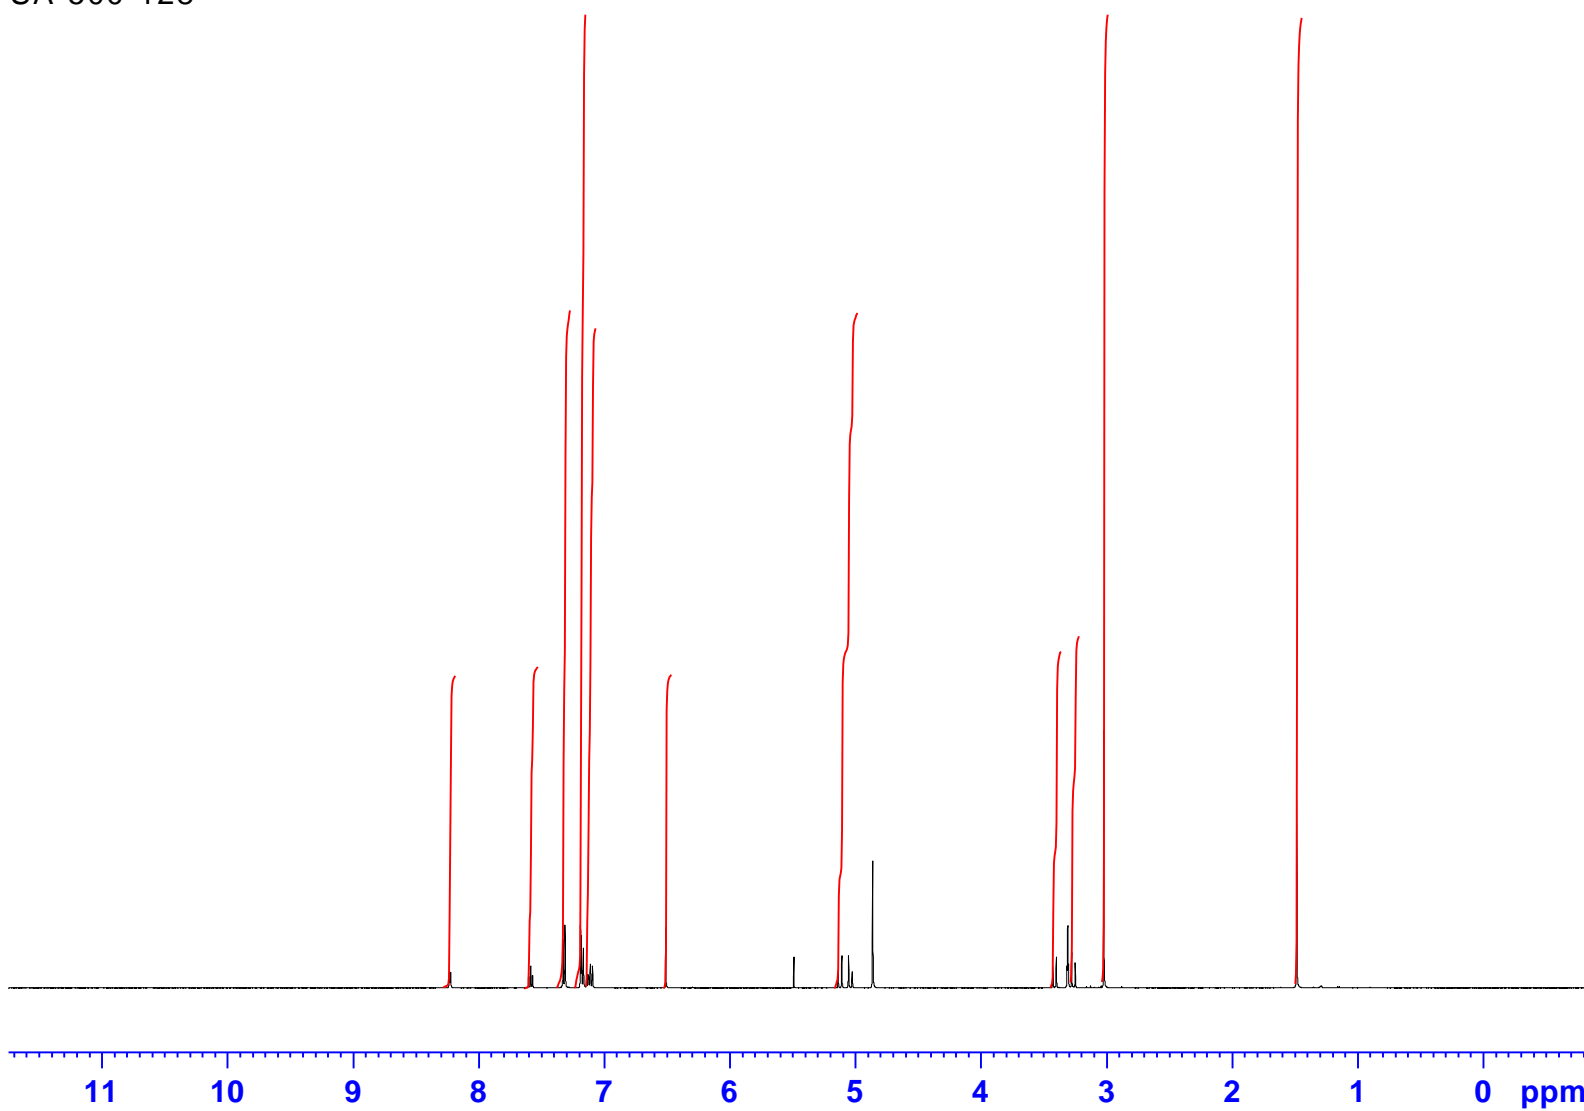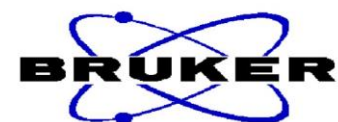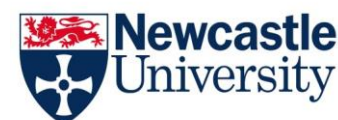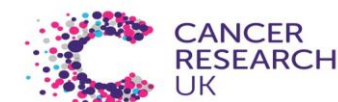

Current Data  
 Name SA-500-128  
 EXPNO 10  
 PROCNO 1

F2 - Acquisition  
 Date 20150312  
 Time 19.05  
 INSTRUM spect  
 PROBHD 5 mm PABBO BB-  
 PULPROG zg30  
 TD 65536  
 SOLVENT MeOD  
 NS 16  
 DS 0  
 SMH 10330.578 Hz  
 FIDRES 0.157632 Hz  
 AQ 3.1719425 sec  
 RG 406  
 DW 48.400 usec  
 DE 11.99 usec  
 TE 297.0 K  
 D1 1.00000000 sec  
 TD0 1

==== CHANNEL f1 =====  
 SFO1 500.3030896 MHz  
 NUC1 1H  
 P1 16.25 usec  
 PLW1 18.33600044 W

F2 - Processing parameters SI  
 65536  
 SF 500.300097 MHz  
 WDW EM  
 SSB 0  
 LB 0.30 Hz  
 GB 0  
 PC 1.00



22b

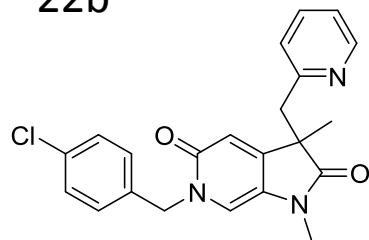

SA-500-128 11 1 Z:\data\SA\nmr

SA-500-128

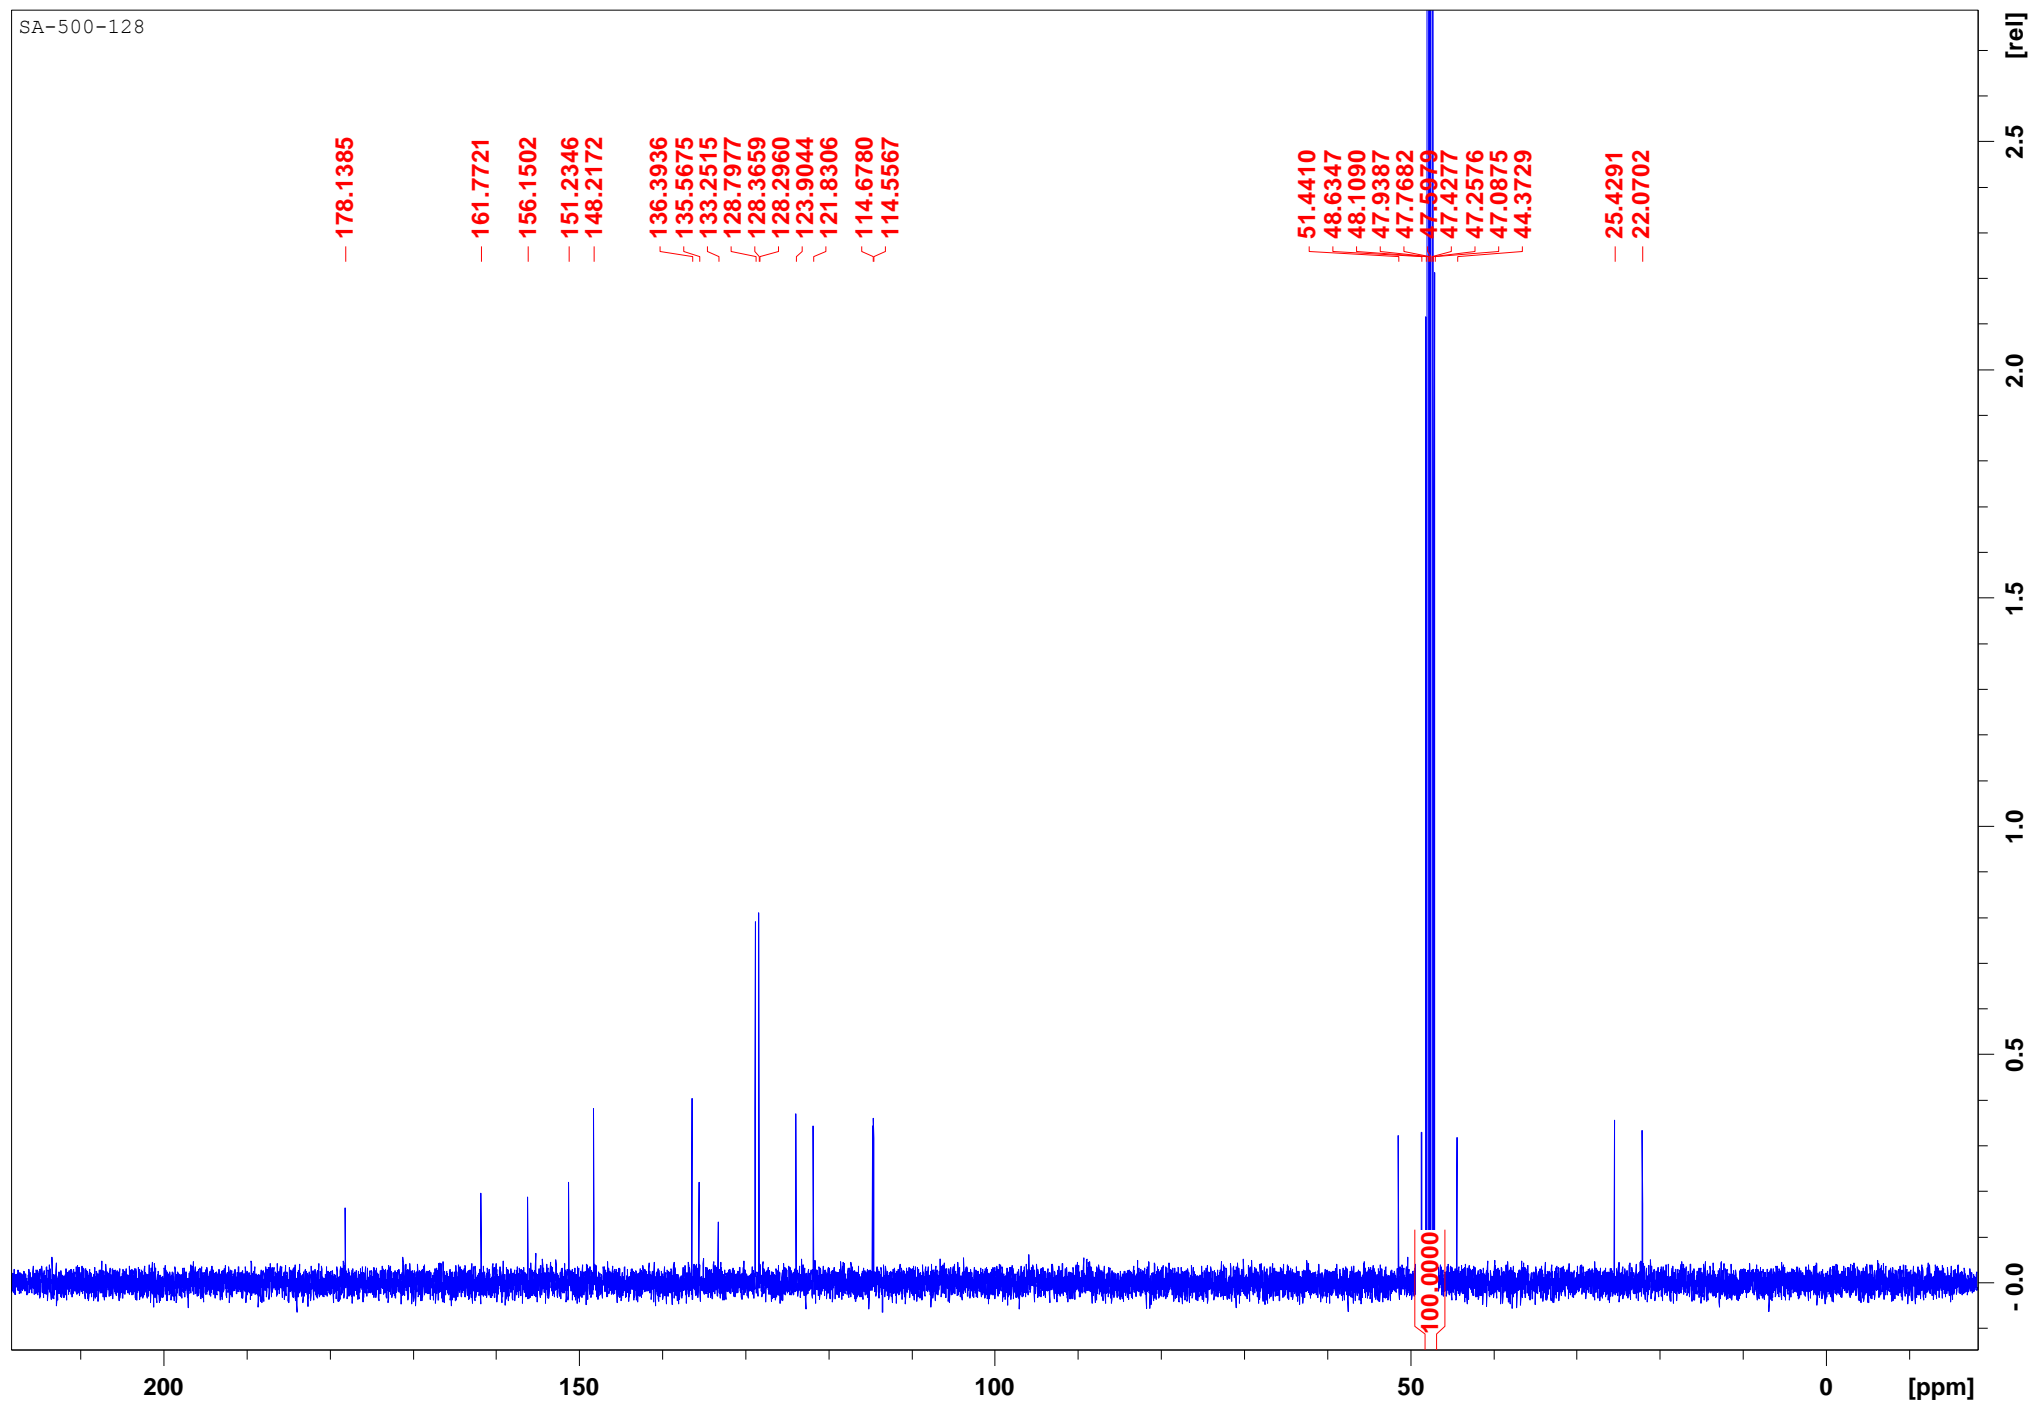

22c

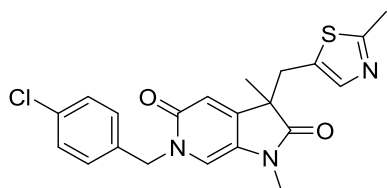

7.244  
7.227  
7.111  
7.095  
6.606  
6.421  
6.360

5.024  
4.993  
4.984  
4.954

3.220  
3.192  
3.066  
3.037  
2.925  
2.467

1.391

SH-493-239A -  
diluted

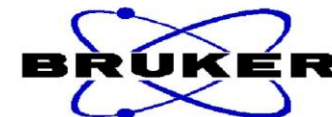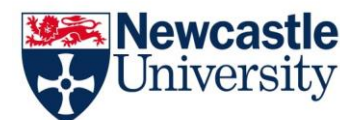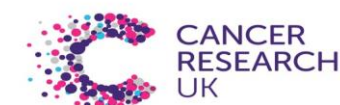

Current Data  
NAME SH-493-239A  
EXPNO 16  
PROCNO 1

F2 - Acquisition  
Data 20150410  
Time 10.16  
INSTRUM spect  
PROBHD 5 mm PABBO BB-  
PULPROG zg30  
TD 65536  
SOLVENT CDCl3  
NS 16  
DS 0  
SMH 10330.578 Hz  
FIDRES 0.157632 Hz  
AQ 3.1719425 sec  
RG 322  
DW 48.400 usec  
DE 11.99 usec  
TE 297.0 K  
D1 1.0000000 sec  
TDO 1

==== CHANNEL f1 =====  
SFO1 500.3030896 MHz  
NUC1 1H  
P1 16.25 usec  
PLW1 18.33600044 W

F2 - Processing parameters SI  
65536  
SF 500.3000438 MHz  
WDW EM  
SSB 0  
LB 0.30 Hz  
GB 0  
PC 1.00

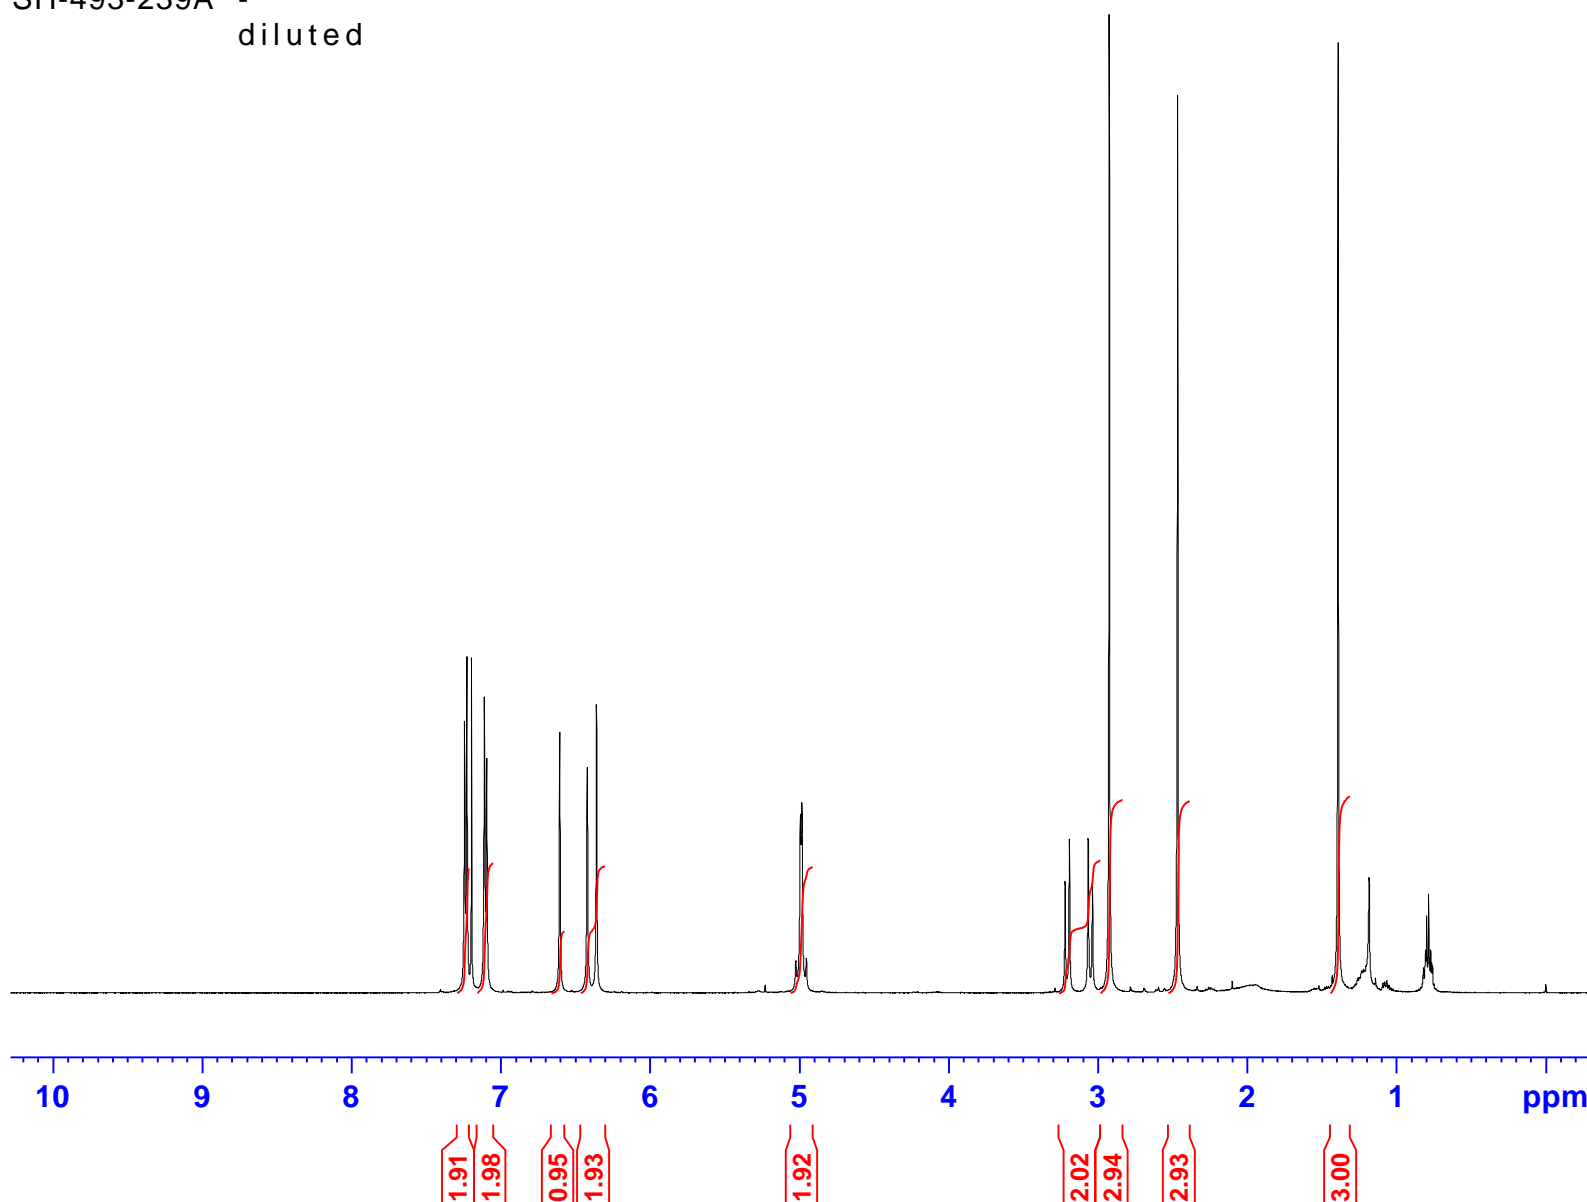

22c



SH-493-239A

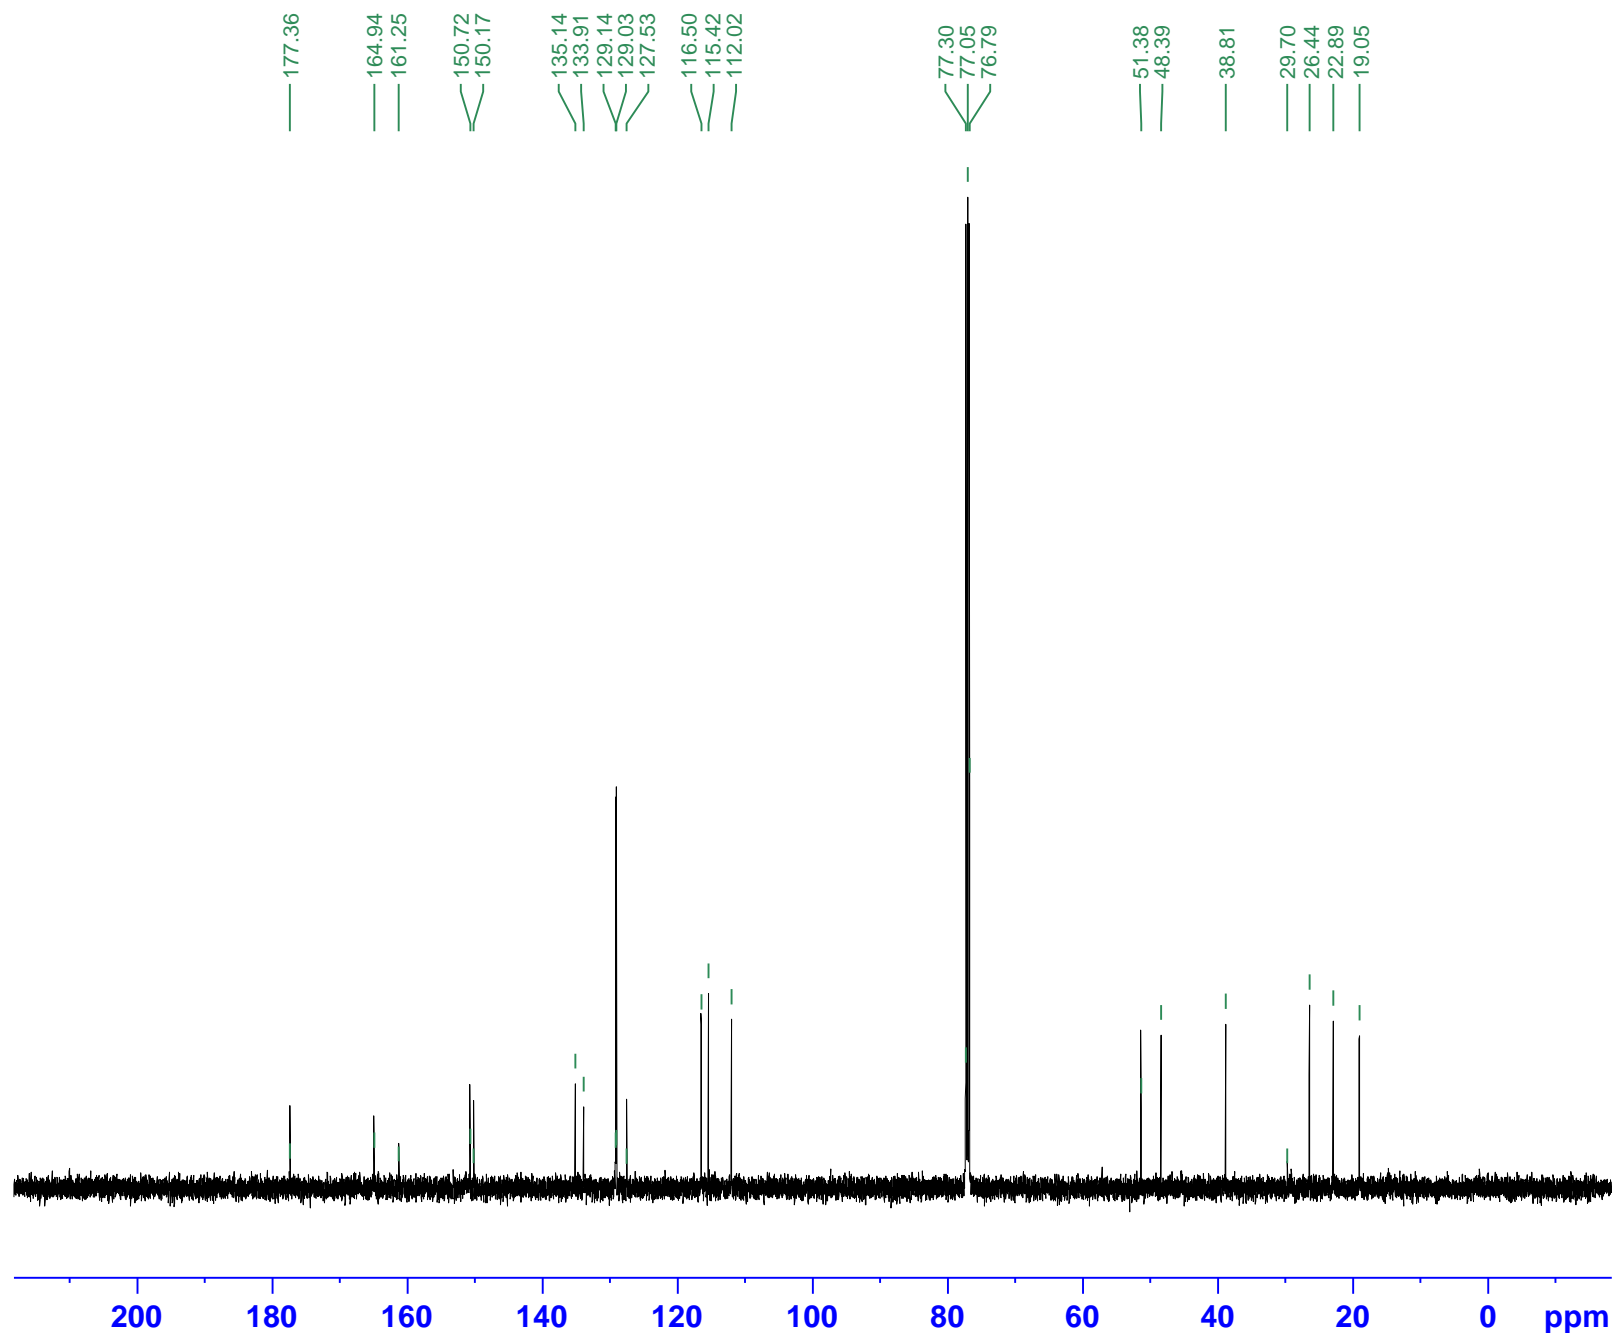

Current Data Parameters  
 NAME SH-493-239A  
 EXPNO 11  
 PROCNO 1

F2 - Acquisition  
 Parameters Date\_ 20150410  
 Time 8.52  
 INSTRUM spect  
 PROBHD 5 mm PABBO BB-  
 PULPROG zgpg30  
 TD 65536  
 SOLVENT CDCl3  
 NS 256  
 DS 2  
 SMH 29761.904 Hz  
 FIDRES 0.454131 Hz  
 AQ 1.1010048 sec  
 RG 575  
 DV 16.800 usec  
 DE 7.68 usec  
 TE 298.7 K  
 D1 2.00000000 sec  
 D11 0.03000000 sec  
 TD0 1

===== CHANNEL f1 =====

SFO1 125.8131151 MHz  
 NUC1 13C  
 P1 9.75 usec  
 PLW1 82.38999939 W

===== CHANNEL f2 =====

SFO2 500.3020012 MHz  
 NUC2 1H  
 CPDPRG2 waltz16  
 PCPD2 80.00 usec  
 PLW2 18.33600044 W  
 PLW12 0.75654000 W  
 PLW13 0.48418999 W

F2 - Processing  
 Parameters 65536  
 SF 125.8005350 MHz  
 WDW EM  
 SSB 0  
 LB 1.00 Hz  
 GB 0  
 PC 1.40

22d

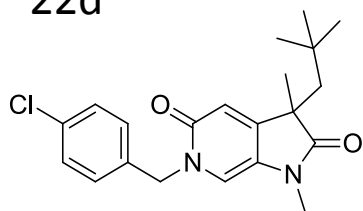

DCM-494-231-A CDCL3

7.336  
7.320  
7.260  
7.251  
6.634  
6.562

3.065

1.301

0.731

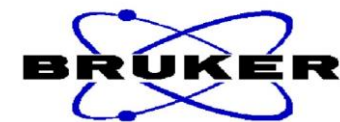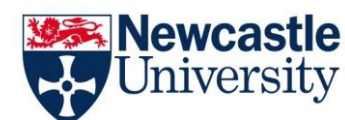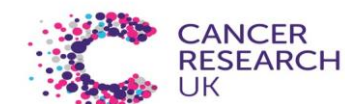

Current Data  
NAME DCM-494-231-A CDCL3  
EXPNO 10  
PROCNO 1

F2 - Acquisition  
Date\_ 20150506  
Time 14.58  
INSTRUM spect  
PROBHD 5 mm PABBO BB-  
PULPROG zg30  
TD 65536  
SOLVENT CDCL3  
NS 16  
DS 0  
SWH 10330.578 Hz  
FIDRES 0.157632 Hz  
AQ 3.1719425 sec  
RG 645  
DW 48.400 usec  
DE 11.99 usec  
TE 297.0 K  
D1 1.00000000 sec  
TD0 1

===== CHANNEL f1 =====  
SFO1 500.3030896 MHz  
NUC1 1H  
P1 16.25 usec  
PLW1 18.33600044 W

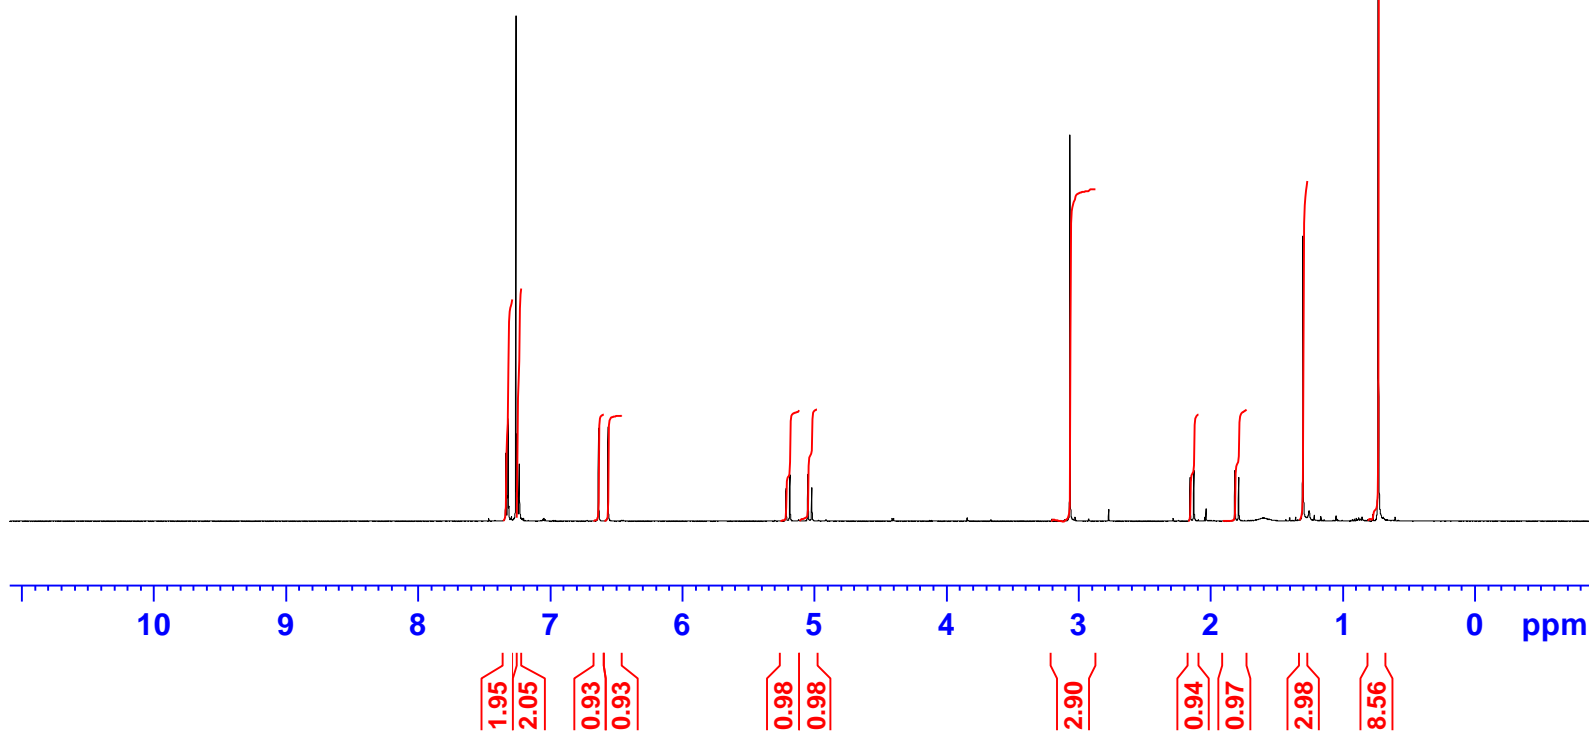

F2 - Processing parameters SI  
65536  
SF 500.3000118 MHz  
WDW EM  
SSB 0  
LB 0.30 Hz  
GB 0  
PC 1.00

22d

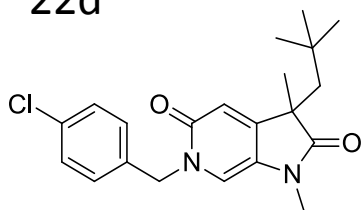

DCM-494-231-A CDCL3

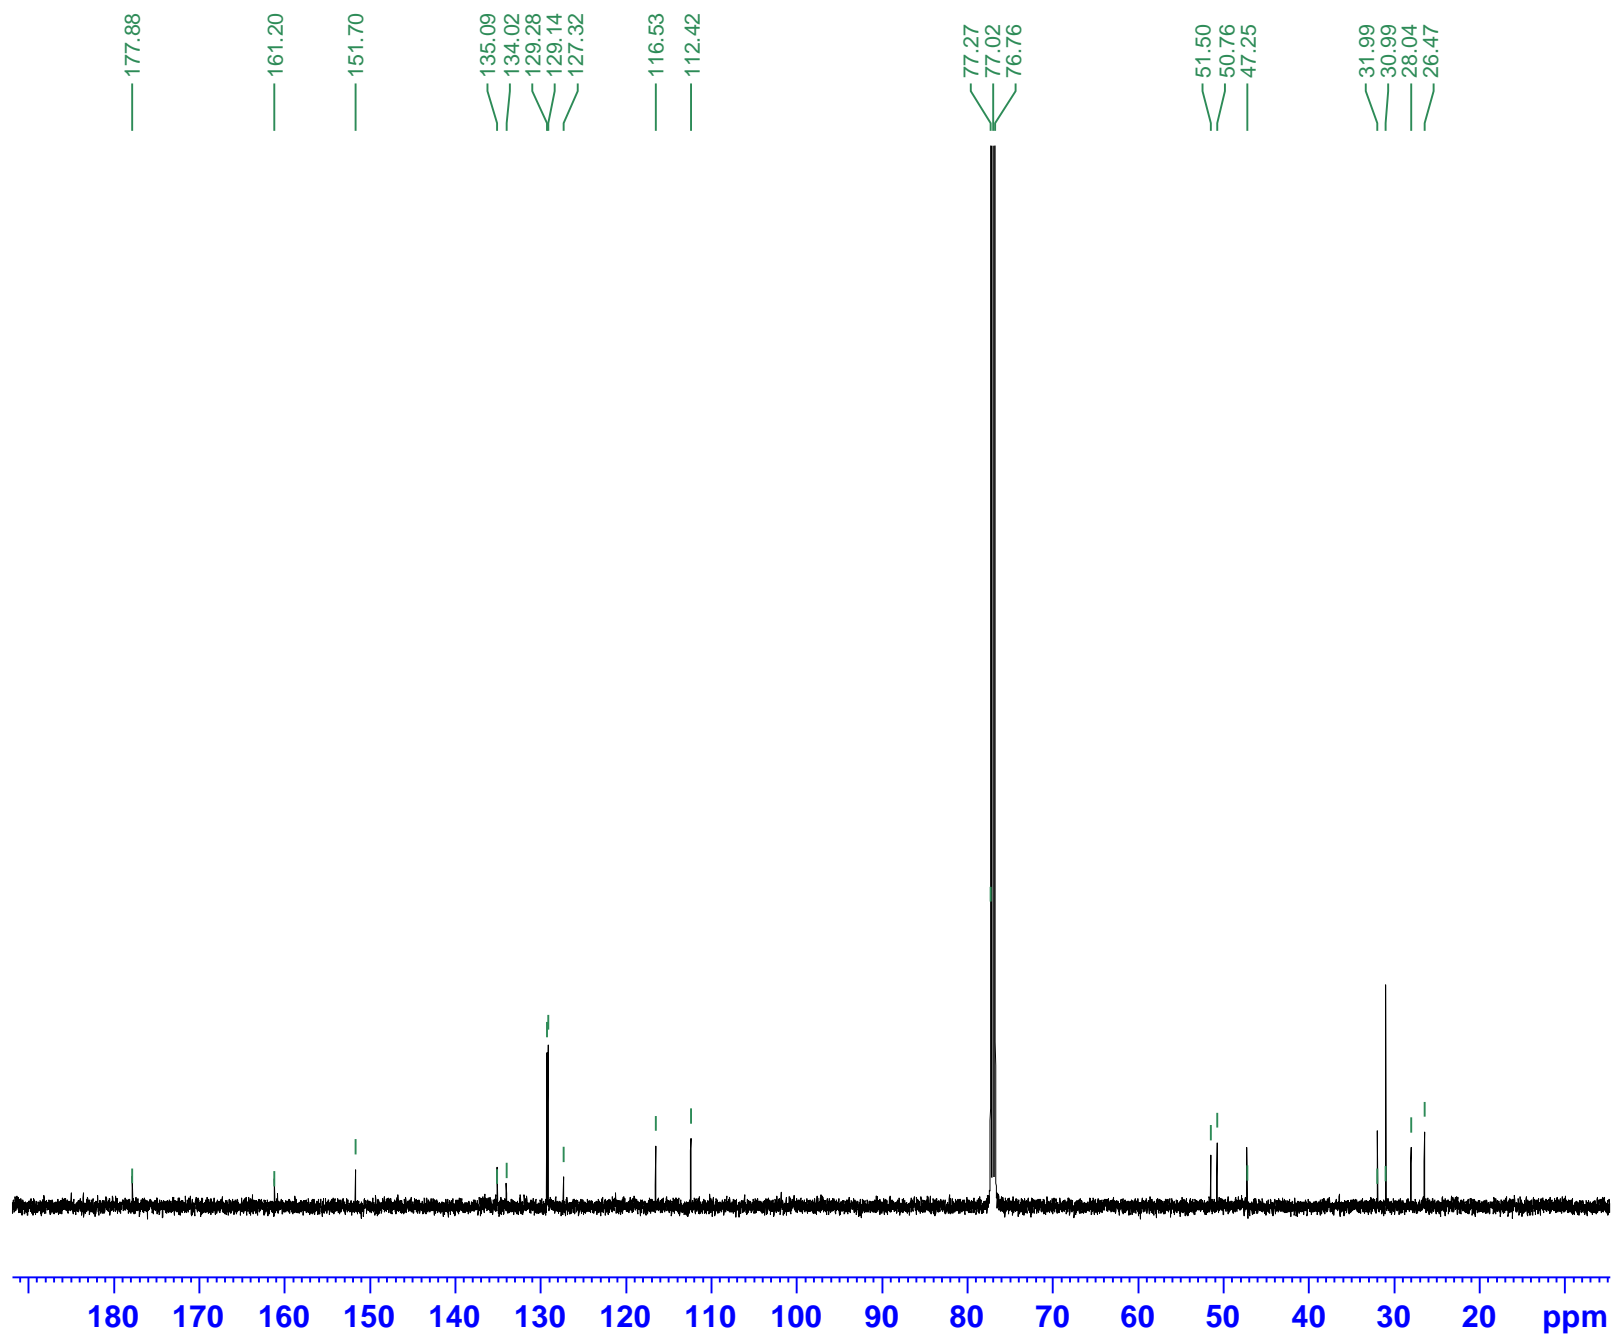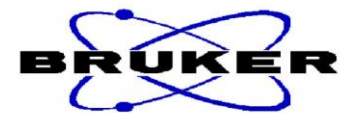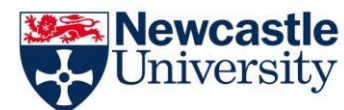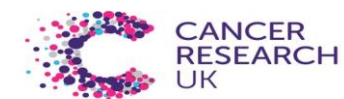

Current Data Parameters  
 NAME DCM-494-231-A\_CDCL3  
 EXPNO 12  
 PROCNO 1

F2 - Acquisition  
 Parameters Date\_ 20150506  
 Time 20.01  
 INSTRUM spect  
 PROBHD 5 mm PABBO BB-  
 PULPROG zgpg30  
 TD 65536  
 SOLVENT CDCL3  
 NS 2048  
 DS 2  
 SWH 29761.904 Hz  
 FIDRES 0.454131 Hz  
 AQ 1.1010048 sec  
 RG 456  
 DW 16.800 usec  
 DE 7.68 usec  
 TE 297.6 K  
 D1 2.00000000 sec  
 D11 0.03000000 sec  
 TD0 1

==== CHANNEL f1 =====  
 SFO1 125.8131151 MHz  
 NUC1 13C  
 P1 9.75 usec  
 PLW1 82.38999939 W

==== CHANNEL f2 =====  
 SFO2 500.3020012 MHz  
 NUC2 1H  
 CPDPRG2 waltz16  
 PCPD2 80.00 usec  
 PLW2 18.33600044 W  
 PLW12 0.75654000 W  
 PLW13 0.48418999 W

F2 - Processing  
 Parameters 65536  
 SF 125.8005350 MHz  
 WDV EM  
 SSB 0  
 LB 1.00 Hz  
 GB 0  
 PC 1.40

22e

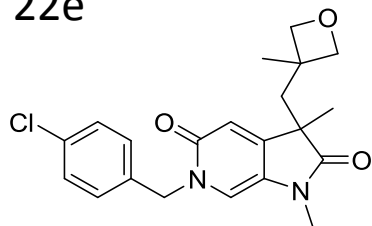

SA-500-160

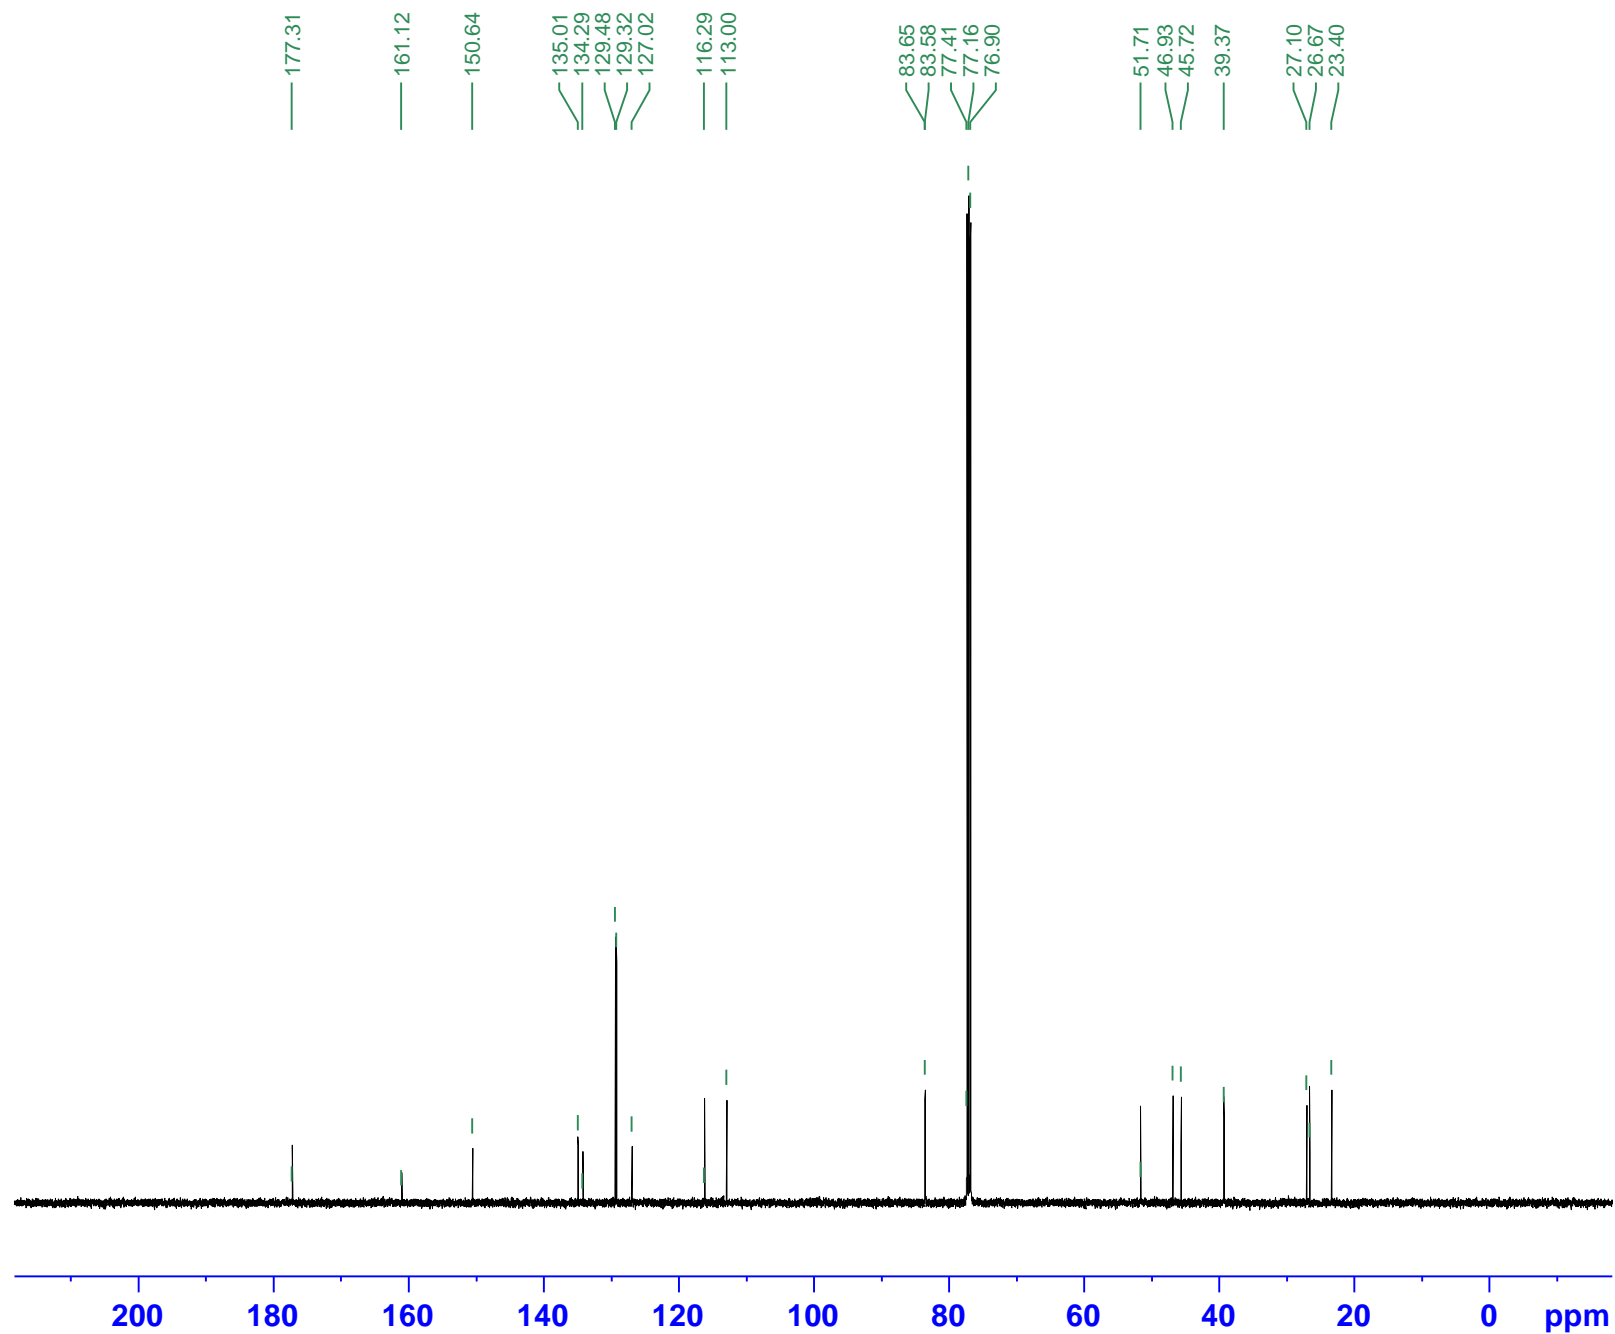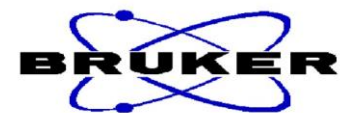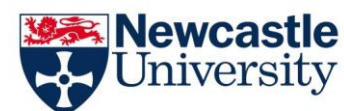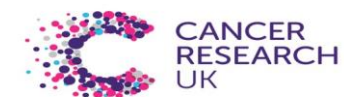

Current Data Parameters  
 NAME SA-500-160  
 EXPNO 11  
 PROCNO 1

F2 - Acquisition  
 Parameters Date\_ 20150402  
 Time 12.53  
 INSTRUM spect  
 PROBHD 5 mm PABBO BB-  
 PULPROG zgpg30  
 TD 65536  
 SOLVENT CDCl3  
 NS 1024  
 DS 2  
 SWH 29761.904 Hz  
 FIDRES 0.454131 Hz  
 AQ 1.1010048 sec  
 RG 575  
 DW 16.800 usec  
 DE 7.68 usec  
 TE 297.9 K  
 D1 2.00000000 sec  
 D11 0.03000000 sec  
 TD0 1

===== CHANNEL f1 =====  
 SFO1 125.8131151 MHz  
 NUC1 13C  
 P1 9.75 usec  
 PLW1 82.38999939 W

===== CHANNEL f2 =====  
 SFO2 500.3020012 MHz  
 NUC2 1H  
 CPDPRG2 waltz16  
 PCPD2 80.00 usec  
 PLW2 18.33600044 W  
 PLW12 0.75654000 W  
 PLW13 0.48418999 W

F2 - Processing  
 Parameters 65536  
 SF 125.8005190 MHz  
 WDV EM  
 SSB 0  
 LB 1.00 Hz  
 GB 0  
 PC 1.40

22e



SA-500-160

7.338  
7.325  
7.321  
7.260  
7.248  
7.230  
6.640  
6.541  
5.228  
5.199  
4.999  
4.969  
4.487  
4.476  
4.452  
4.440  
4.062  
4.051  
3.945  
3.933  
3.046  
2.418  
2.389  
2.242  
2.213  
1.358  
1.058

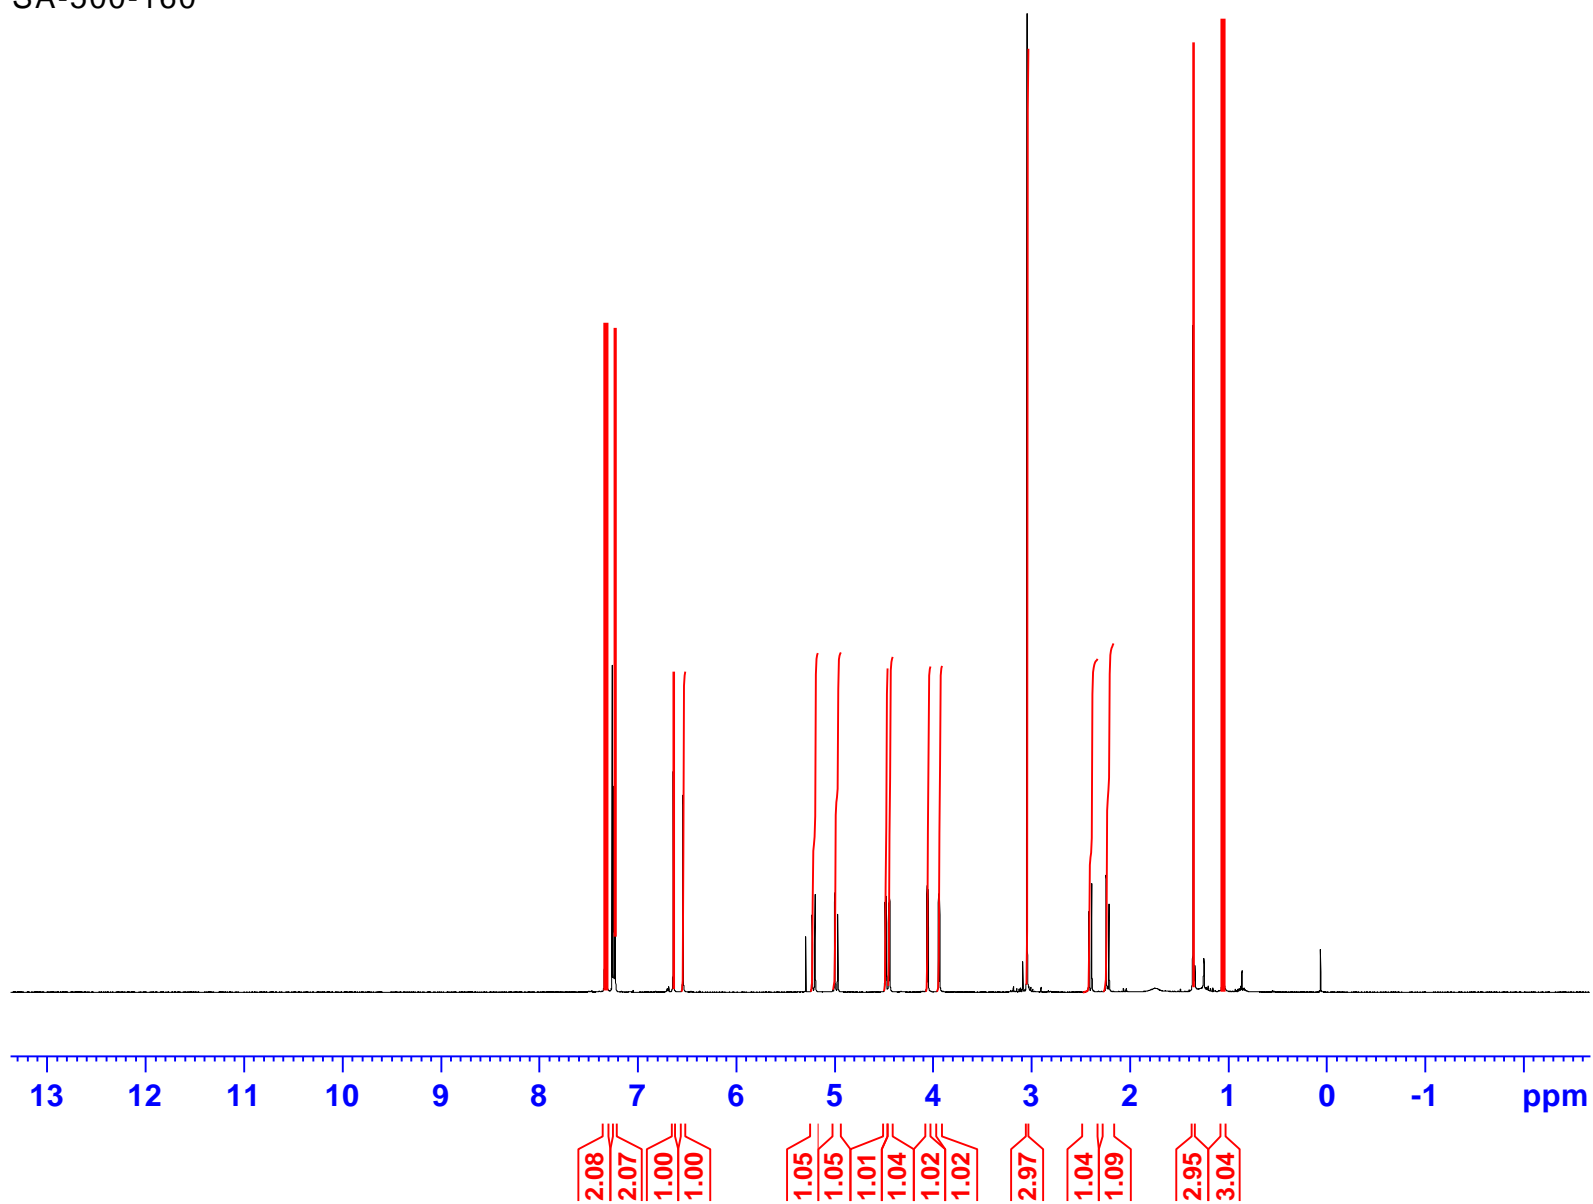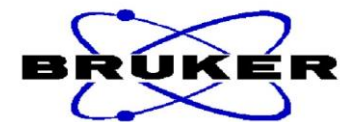

Current Data  
NAME SA-500-160  
EXPNO 10  
PROCNO 1

F2 - Acquisition  
Data Parameters 20150402  
Time 11.12  
INSTRUM spect  
PROBHD 5 mm PABBO BB-  
PULPROG zg30  
TD 65536  
SOLVENT CDCl3  
NS 16  
DS 0  
SMH 10330.578 Hz  
FIDRES 0.157632 Hz  
AQ 3.1719425 sec  
RG 322  
DW 48.400 usec  
DE 11.99 usec  
TE 297.1 K  
D1 1.00000000 sec  
TD0 1

==== CHANNEL f1  
SFO1 =====  
NUC1 500.3030896 MHz  
P1 1H  
PLW1 16.25 usec  
18.33600044 W  
F2 Processing parameters  
- S1 65536  
SF 500.3000122 MHz  
VDW EM  
SSB 0  
LB 0.30 Hz  
GB 0  
PC 1.00

22f

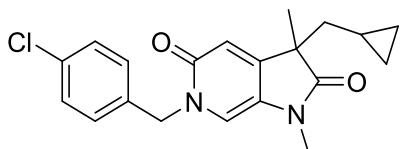

7.340  
7.327  
7.323  
7.279  
7.260

6.614  
6.567

5.200  
5.170  
5.053  
5.024

3.070

1.647  
1.567  
1.347

0.068

DCM-494-202-A CDCL<sub>3</sub>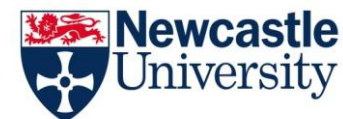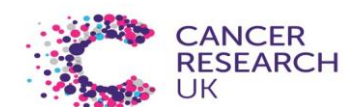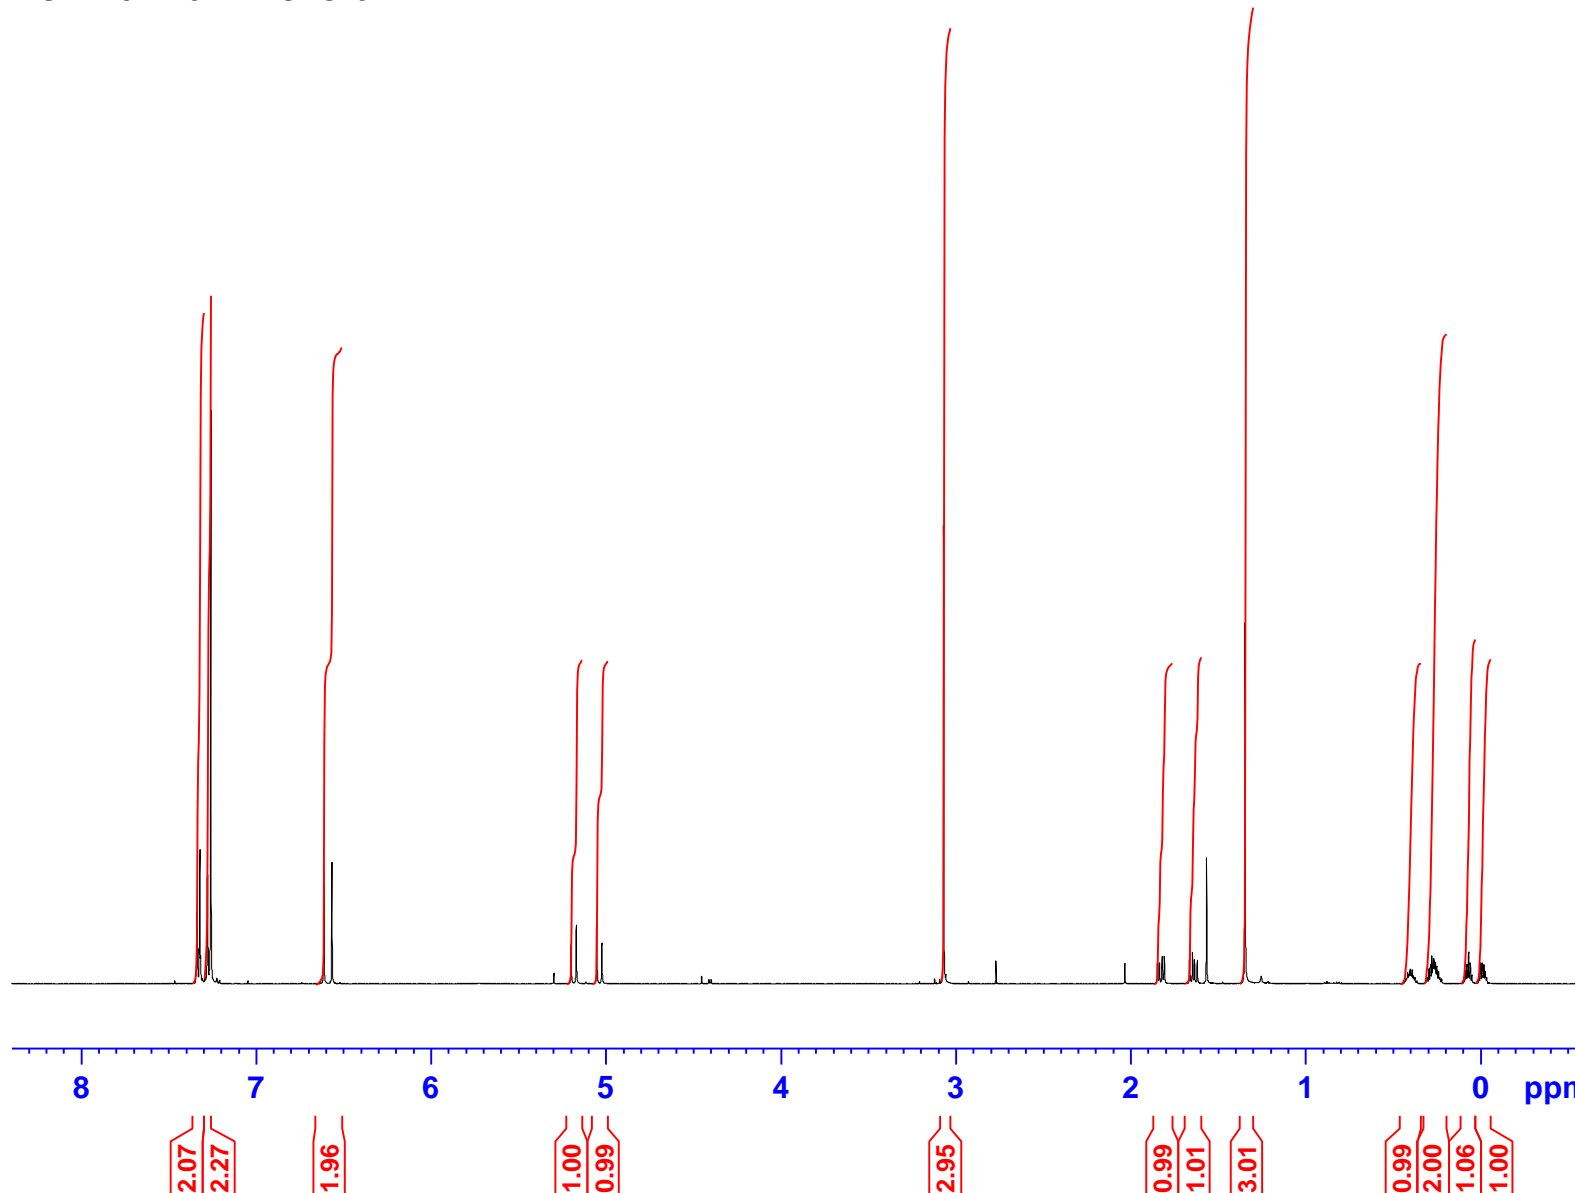

Current Data  
NAME DCM-494-202-A CDCL<sub>3</sub>  
EXPNO 10  
PROCNO 1

F2 - Acquisition  
Date\_ 20150317  
Time 17.46  
INSTRUM spect  
PROBHD 5 mm PABBO BB-  
PULPROG zg30  
TD 65536  
SOLVENT CDCL<sub>3</sub>  
NS 16  
DS 0  
SWH 10330.578 Hz  
FIDRES 0.157632 Hz  
AQ 3.1719425 sec  
RG 645  
DW 48.400 usec  
DE 11.99 usec  
TE 297.0 K  
D1 1.00000000 Sec  
TD0 1

==== CHANNEL f1  
SFO1 500.3030896 MHz  
NUC1 1H  
P1 16.25 usec  
PLW1 18.33600044 W  
F2 Processing parameters  
- SI 65536  
SF 500.3000120 MHz  
WDW EM  
SSB 0  
LB 0.30 Hz  
GB 0  
PC 1.00



22f

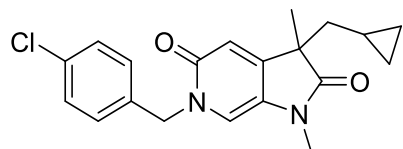

DCM-494-202-A CDCL3

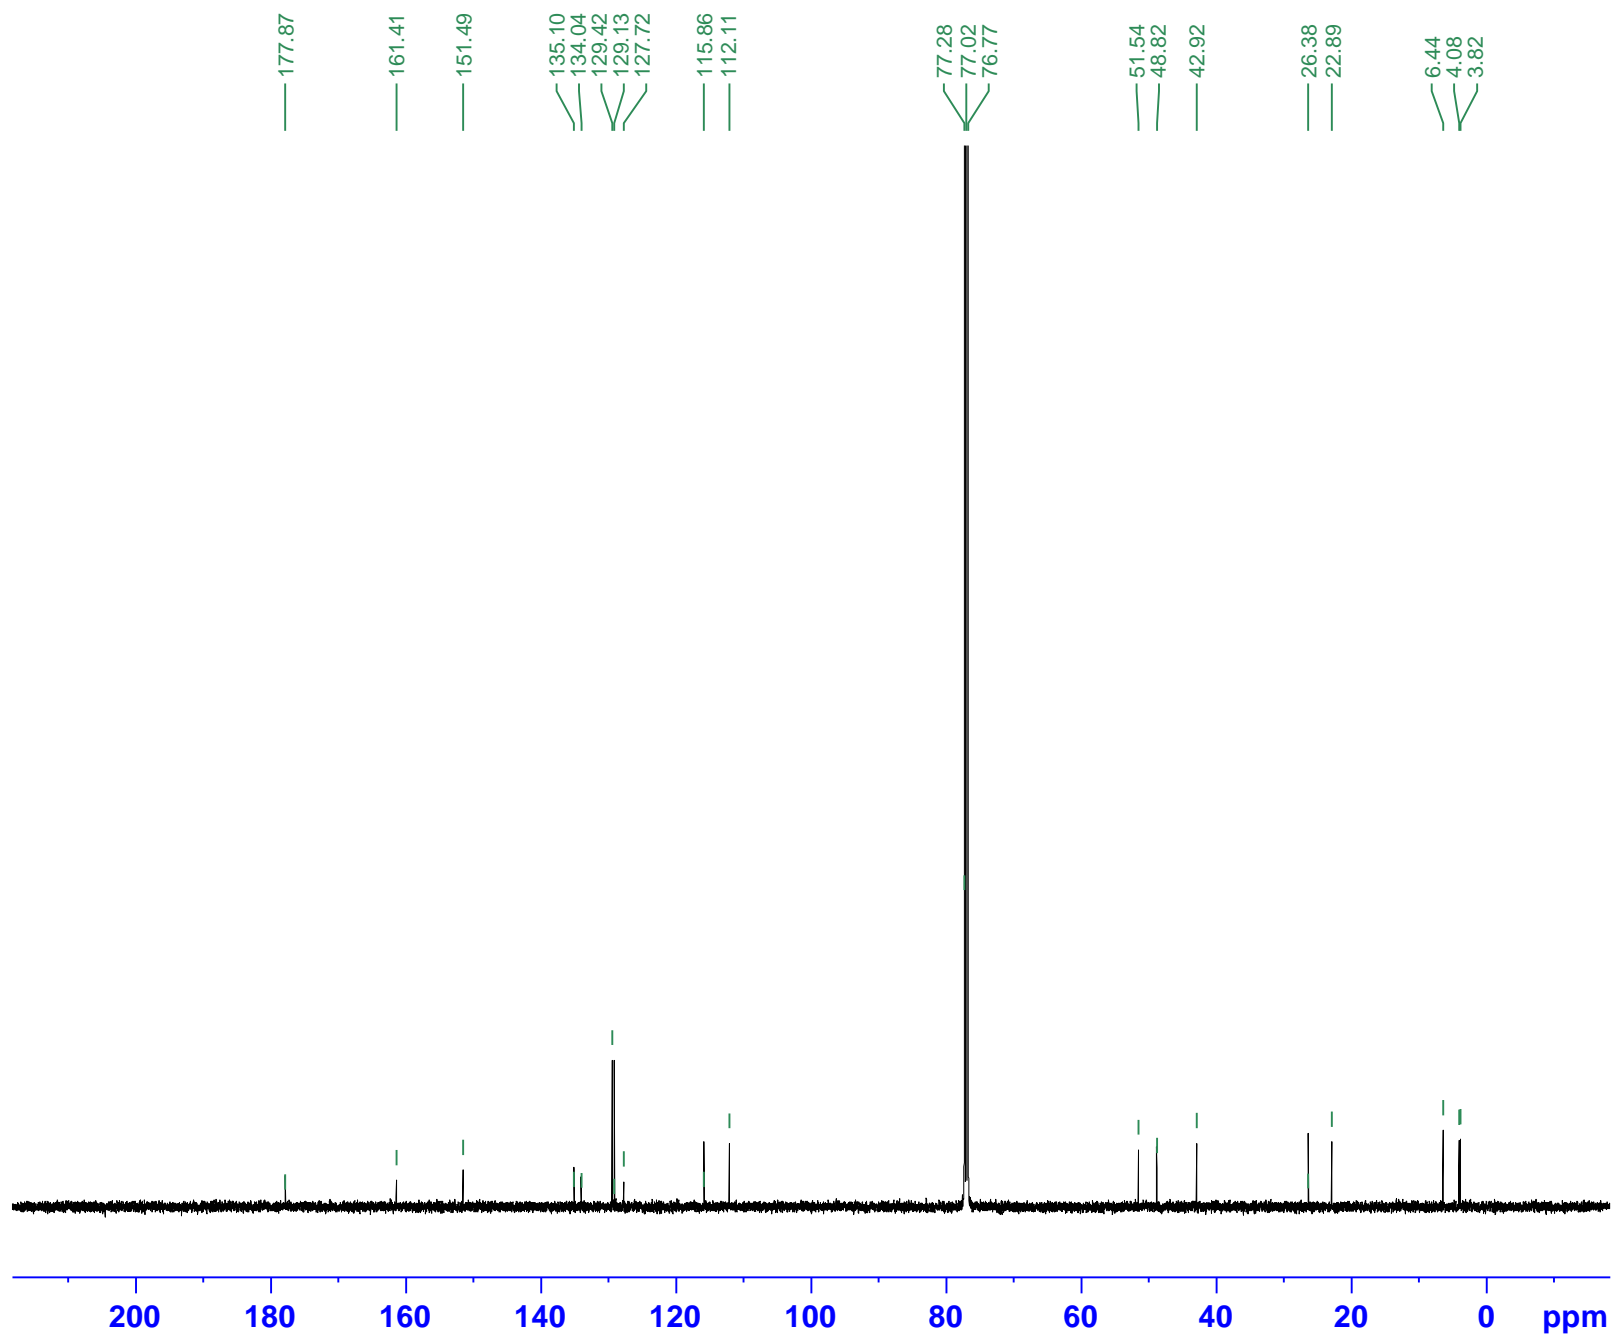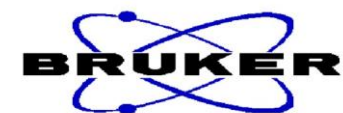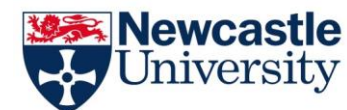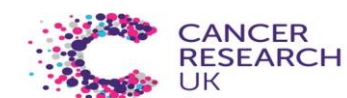

Current Data Parameters  
NAME DCM-494-202-A CDCL3  
EXPNO 11  
PROCNO 1

F2 - Acquisition  
Parameters Date\_ 20150318  
Time 5.44  
INSTRUM spect  
PROBHD 5 mm PABBO BB-  
PULPROG zgpg30  
TD 65536  
SOLVENT CDCL3  
NS 3096  
DS 2  
SWH 29761.904 Hz  
FIDRES 0.454131 Hz  
AQ 1.1010048 sec  
RG 456  
DW 16.800 usec  
DE 7.68 usec  
TE 297.0 K  
D1 2.00000000 sec  
D11 0.03000000 sec  
TD0 1

===== CHANNEL f1 =====  
SFO1 125.8131151 MHz  
NUC1 13C  
P1 9.75 usec  
PLW1 82.38999939 W

===== CHANNEL f2 =====  
SFO2 500.3020012 MHz  
NUC2 1H  
CPDPRG2 waltz16  
PCPD2 80.00 usec  
PLW2 18.33600044 W  
PLW12 0.75654000 W  
PLW13 0.48418999 W

F2 - Processing  
Parameters 65536  
SF 125.8005350 MHz  
WDW EM  
SSB 0  
LB 1.00 Hz  
GB 0  
PC 1.40

23

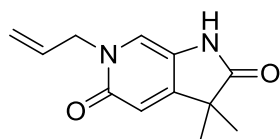

"DCM-494-104-A CDCL3" 10 1 "V:\Old Server\DCM\nmr"

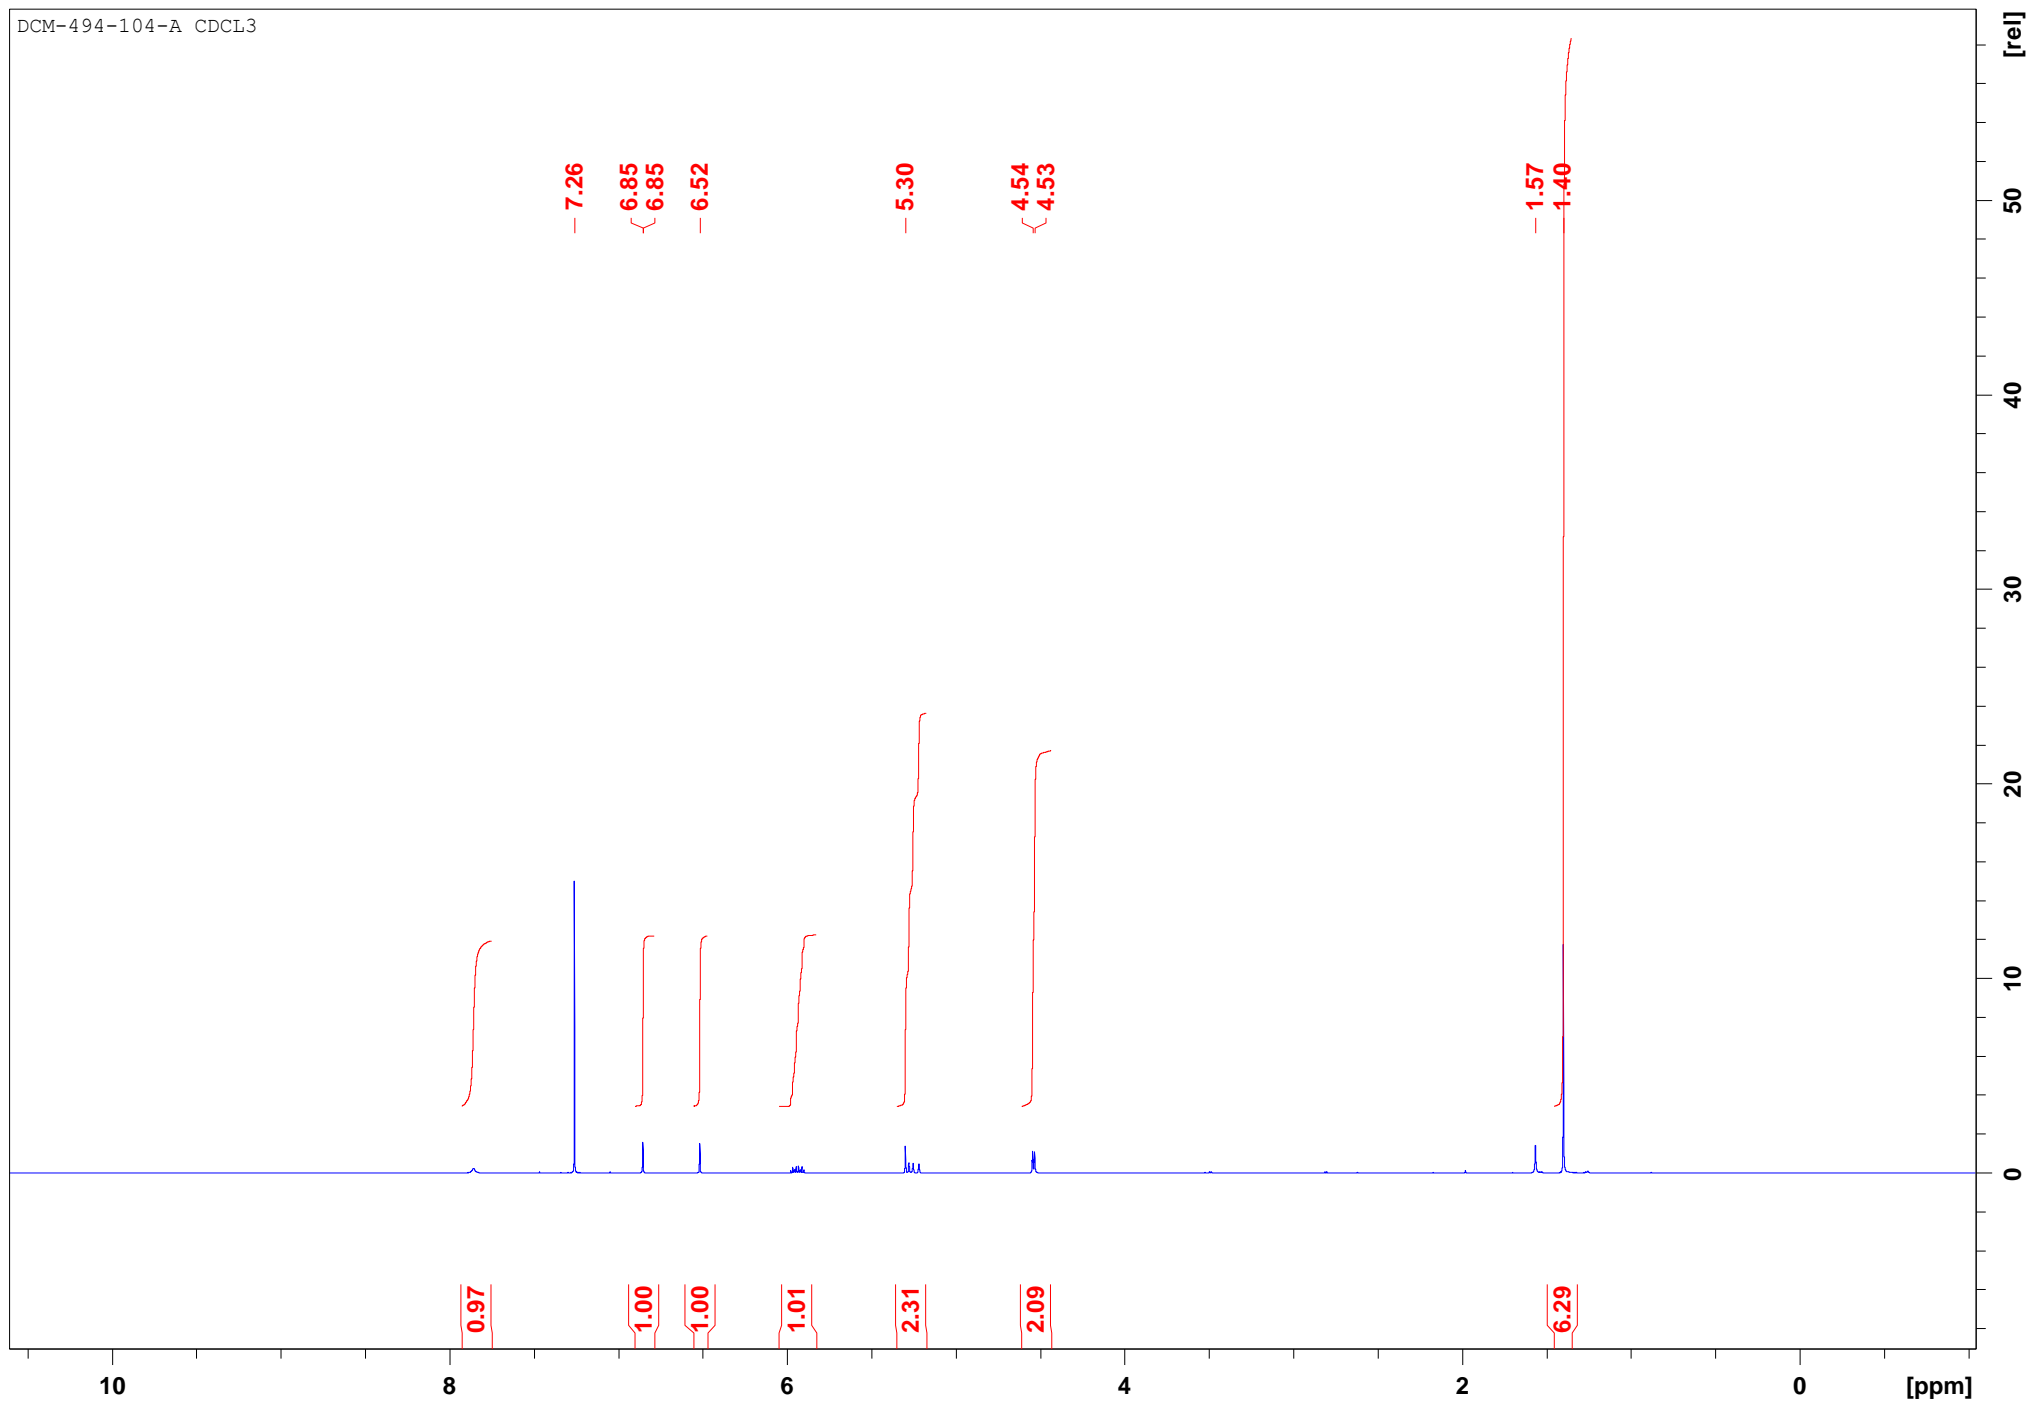

23

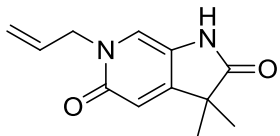

"DCM-494-104-A CDCL3" 14 1 "V:\Old Server\DCM\nmr"

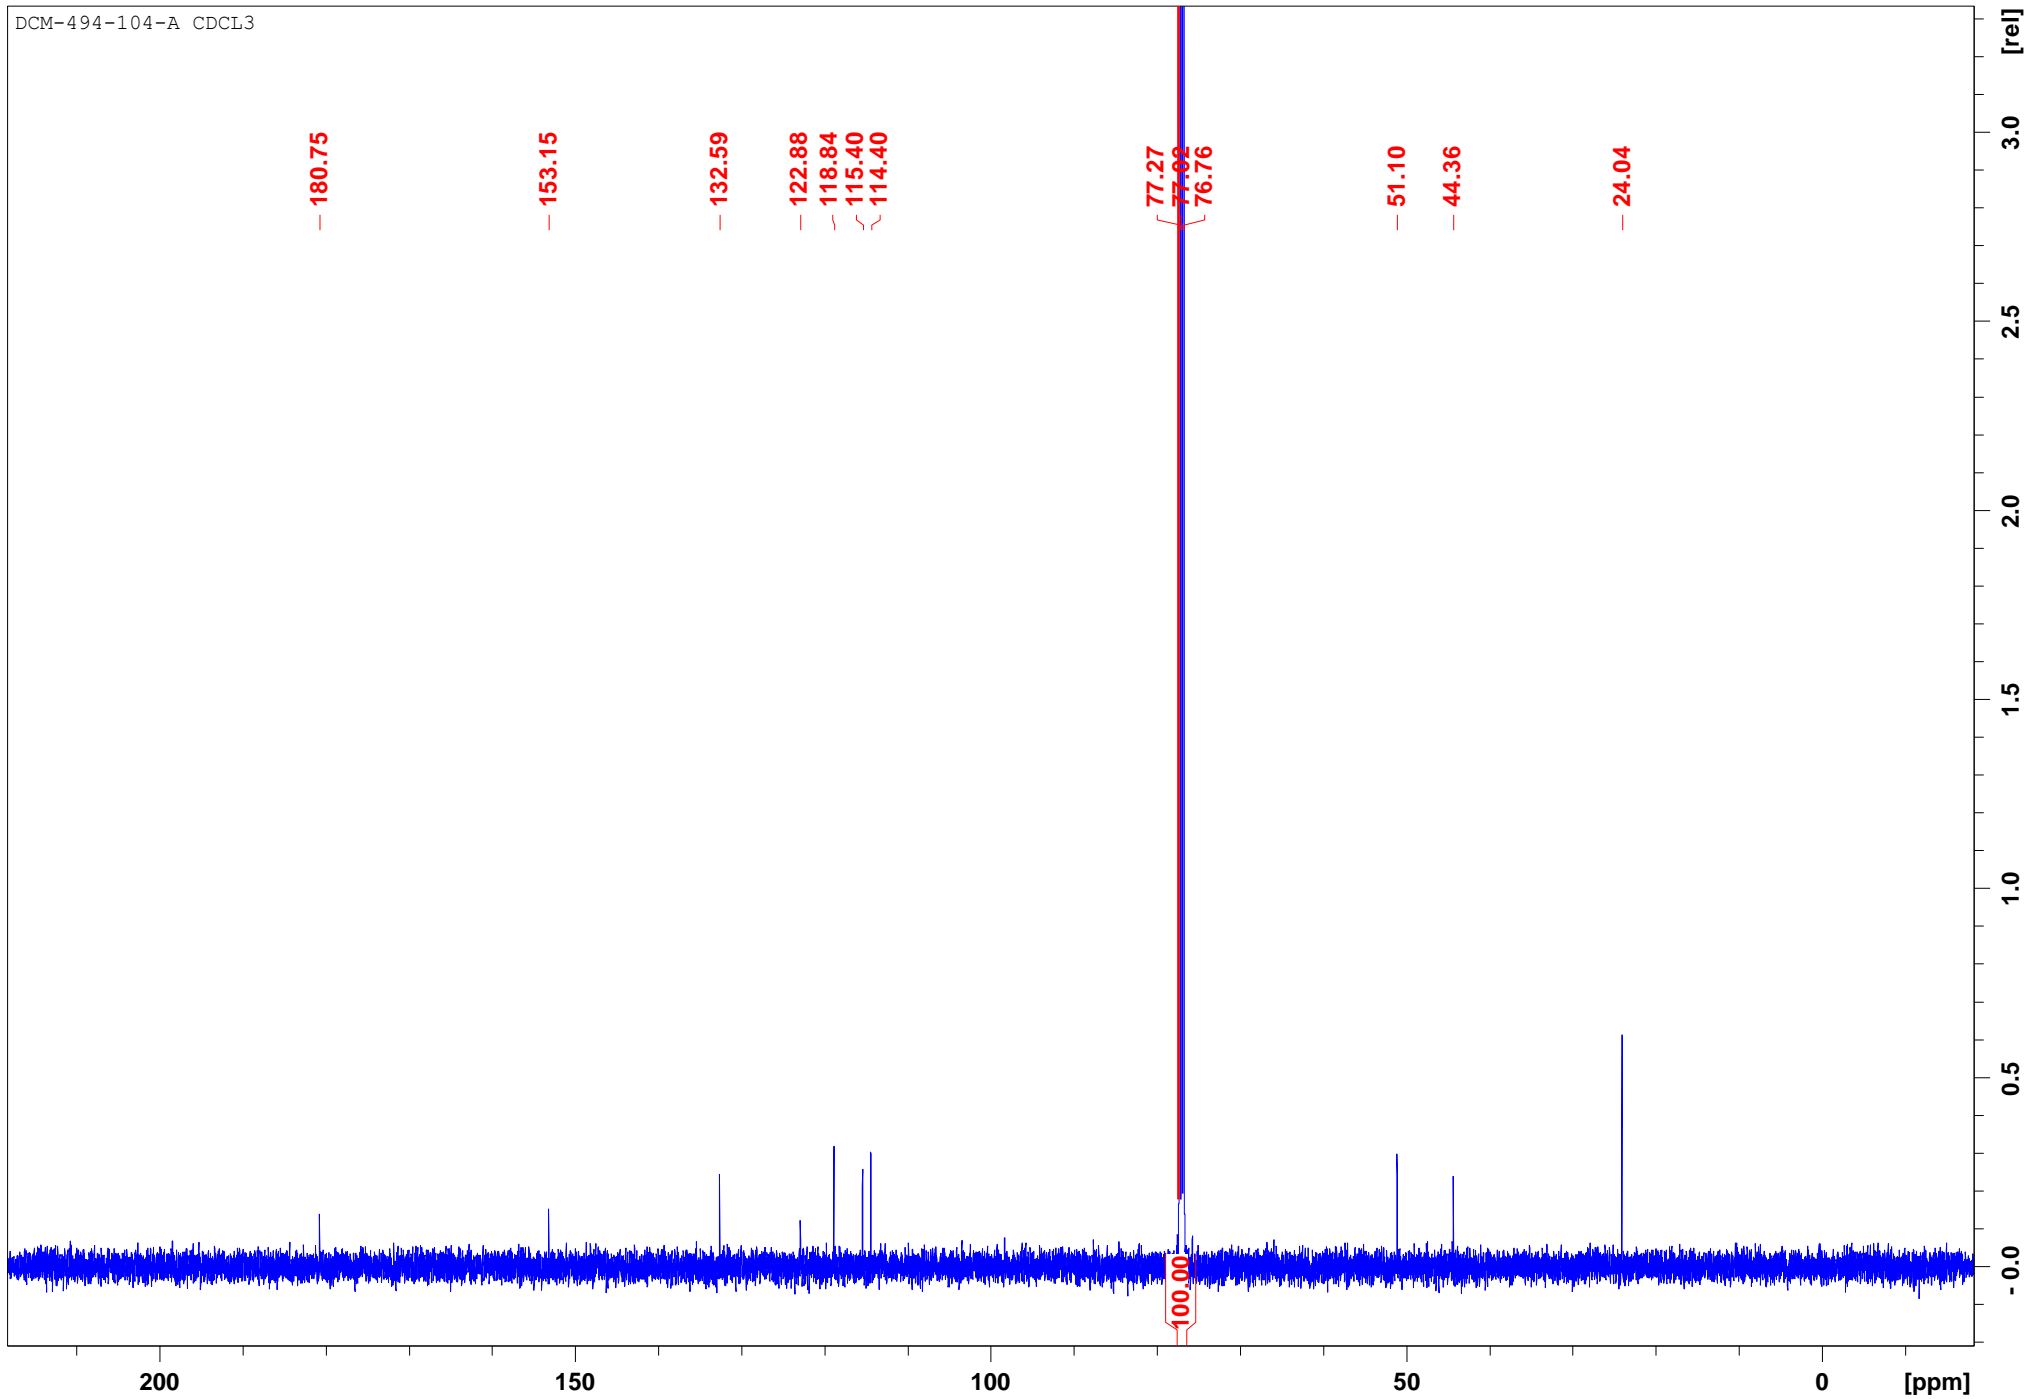

24

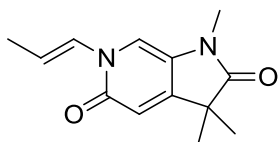

"DCM-494-108-A CDCL3" 10 1 "V:\Old Server\DCM\nmr"

DCM-494-108-A CDCL3

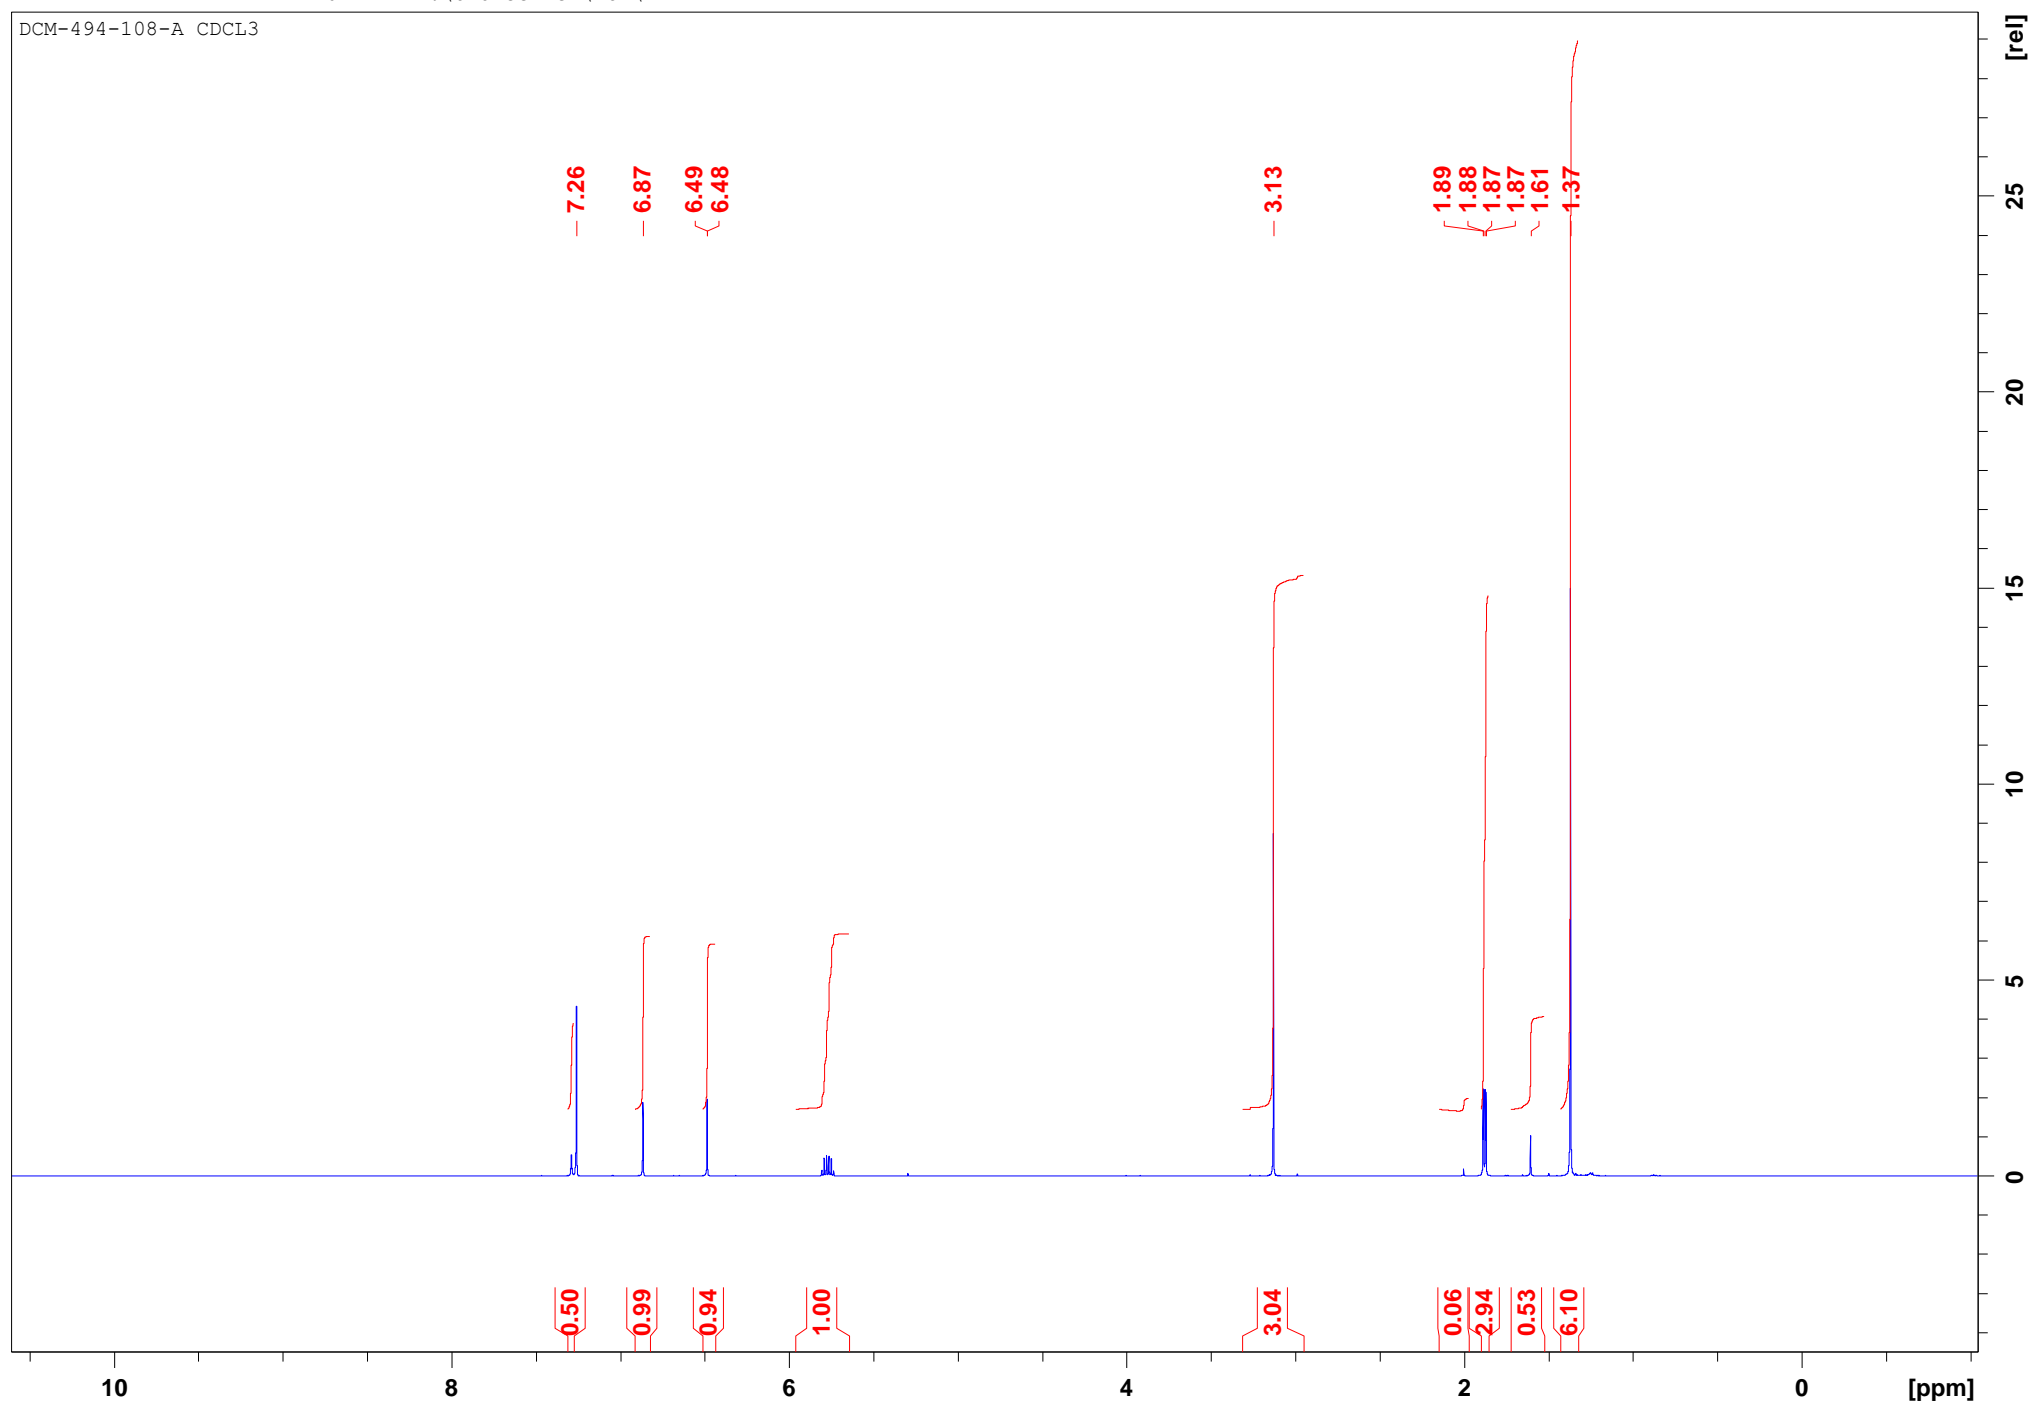

24



"DCM-494-108-A CDCL3" 11 1 "V:\Old Server\DCM\nmr"

DCM-494-108-A CDCL3

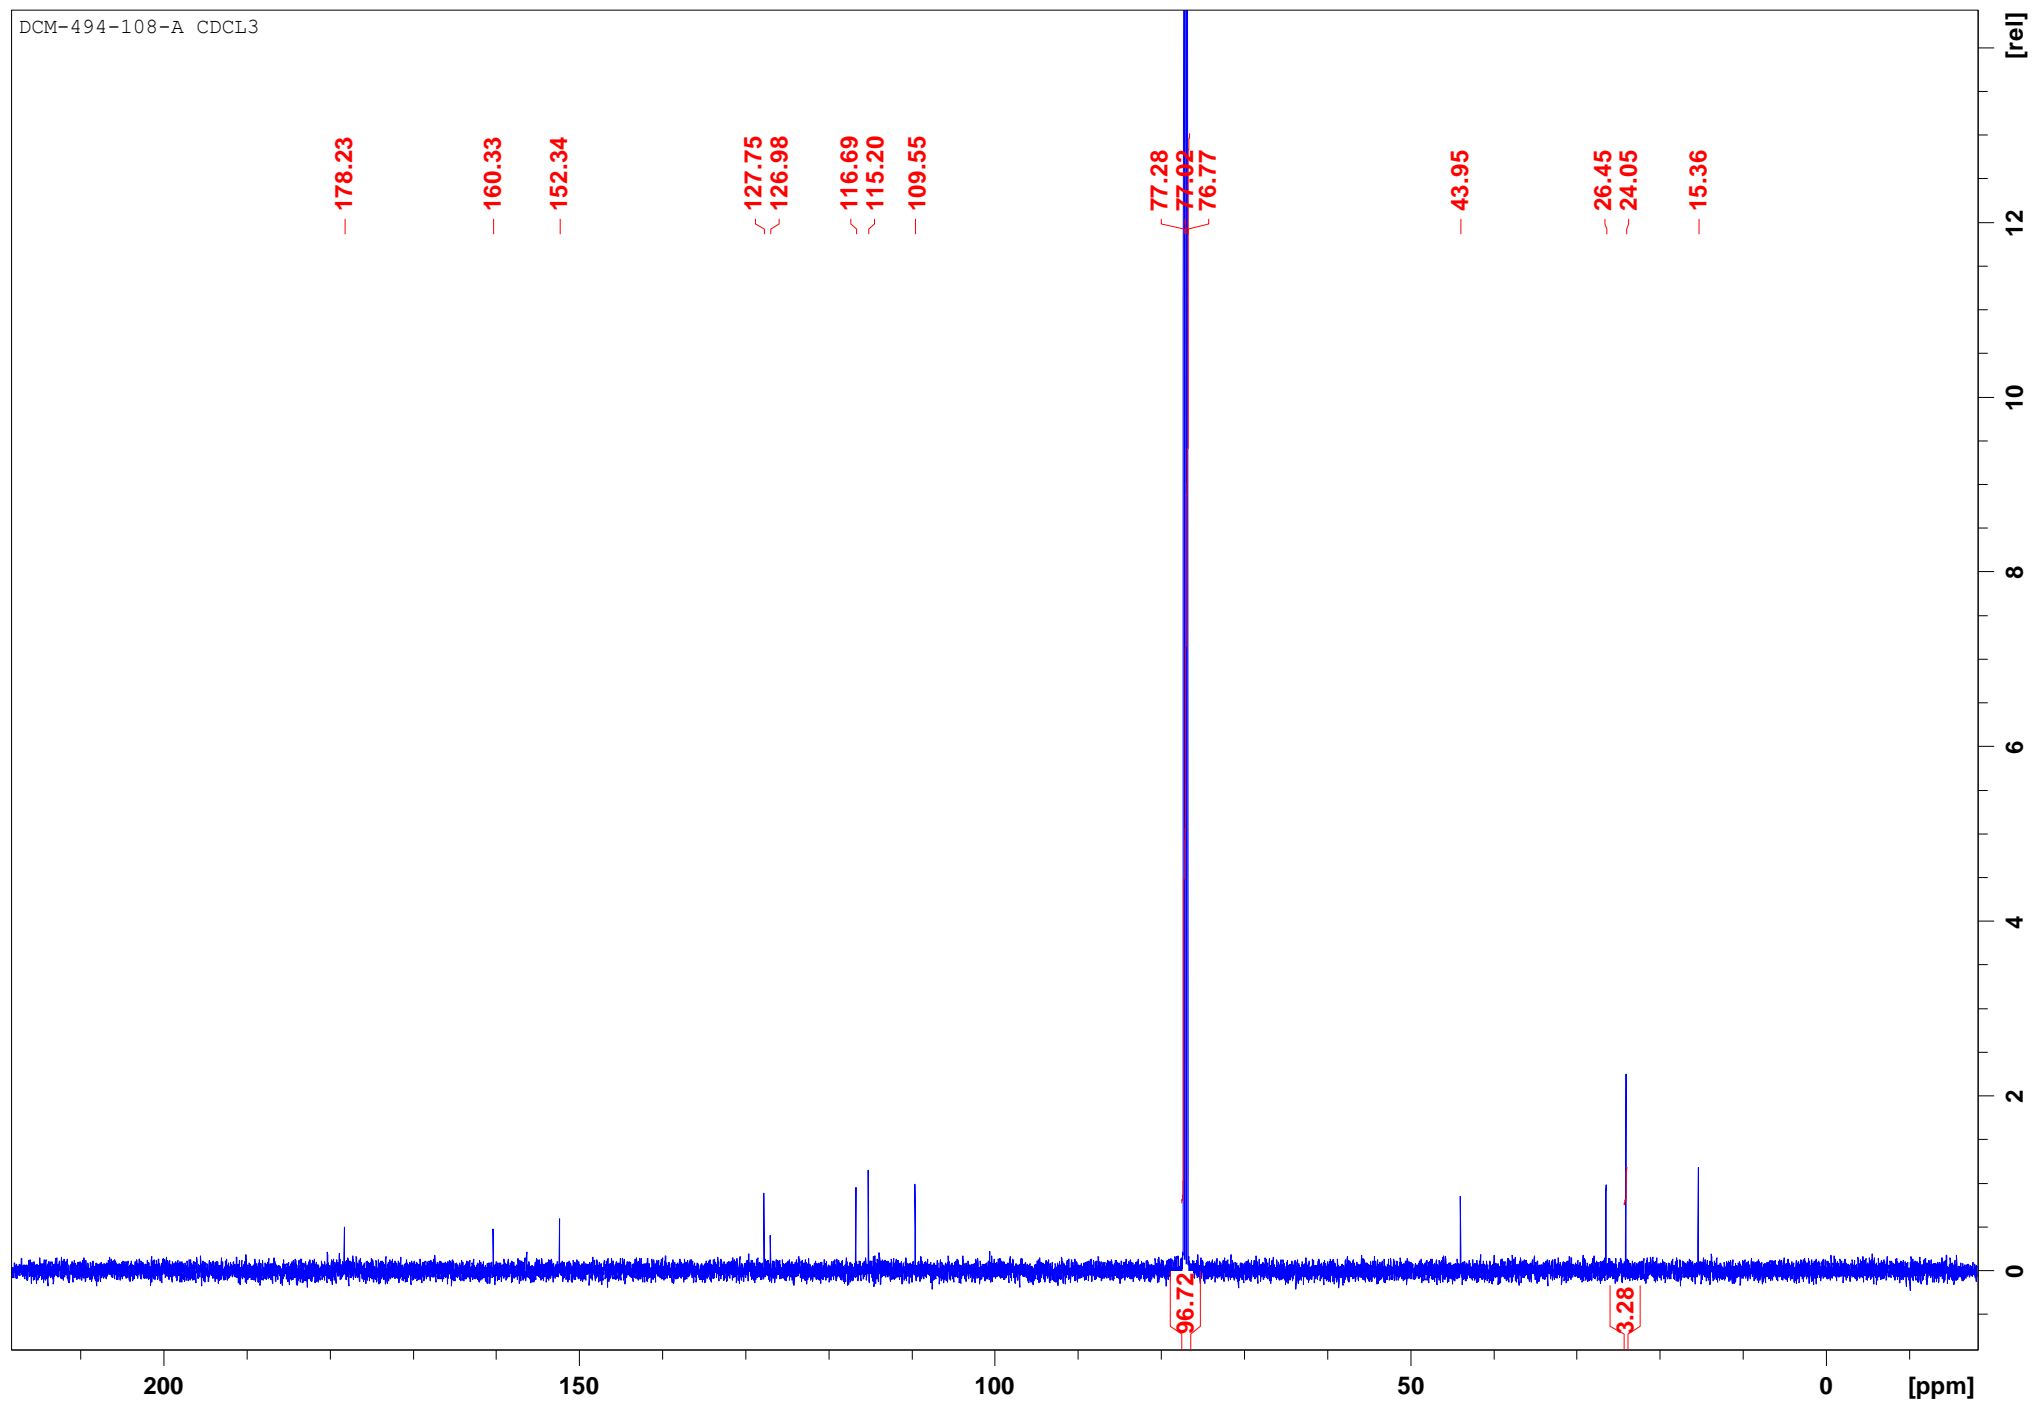

26

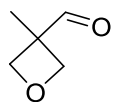

SA-500-150 10 1 "X:\Old Server\SA\nmr"

SA-500-150

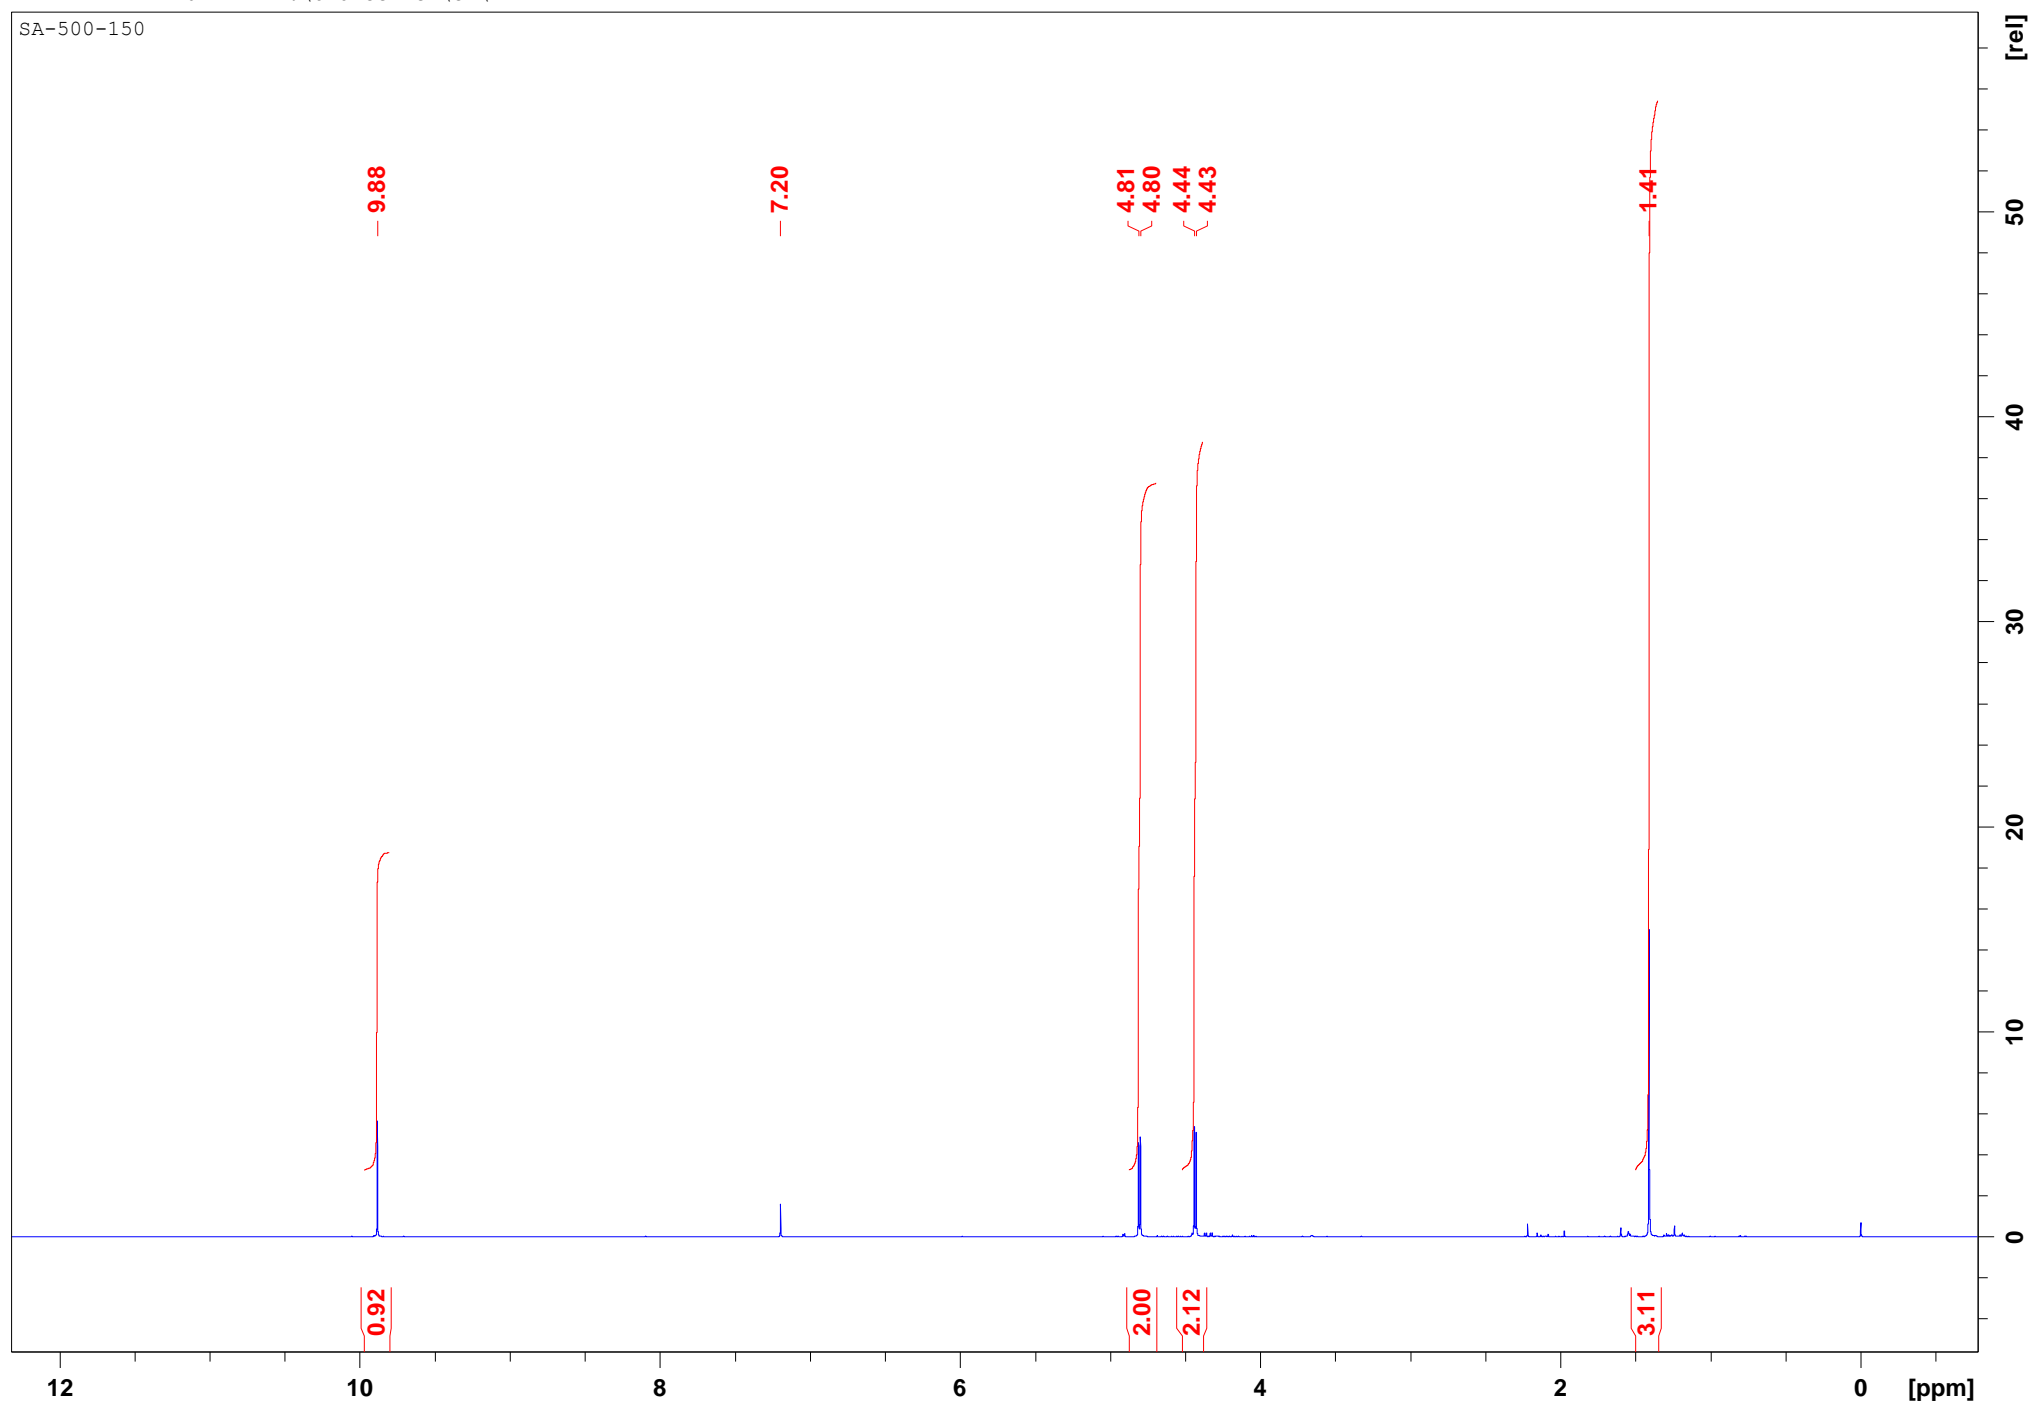

26

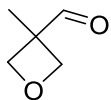

SA-500-150 11 1 "X:\Old Server\SA\nmr"

SA-500-150

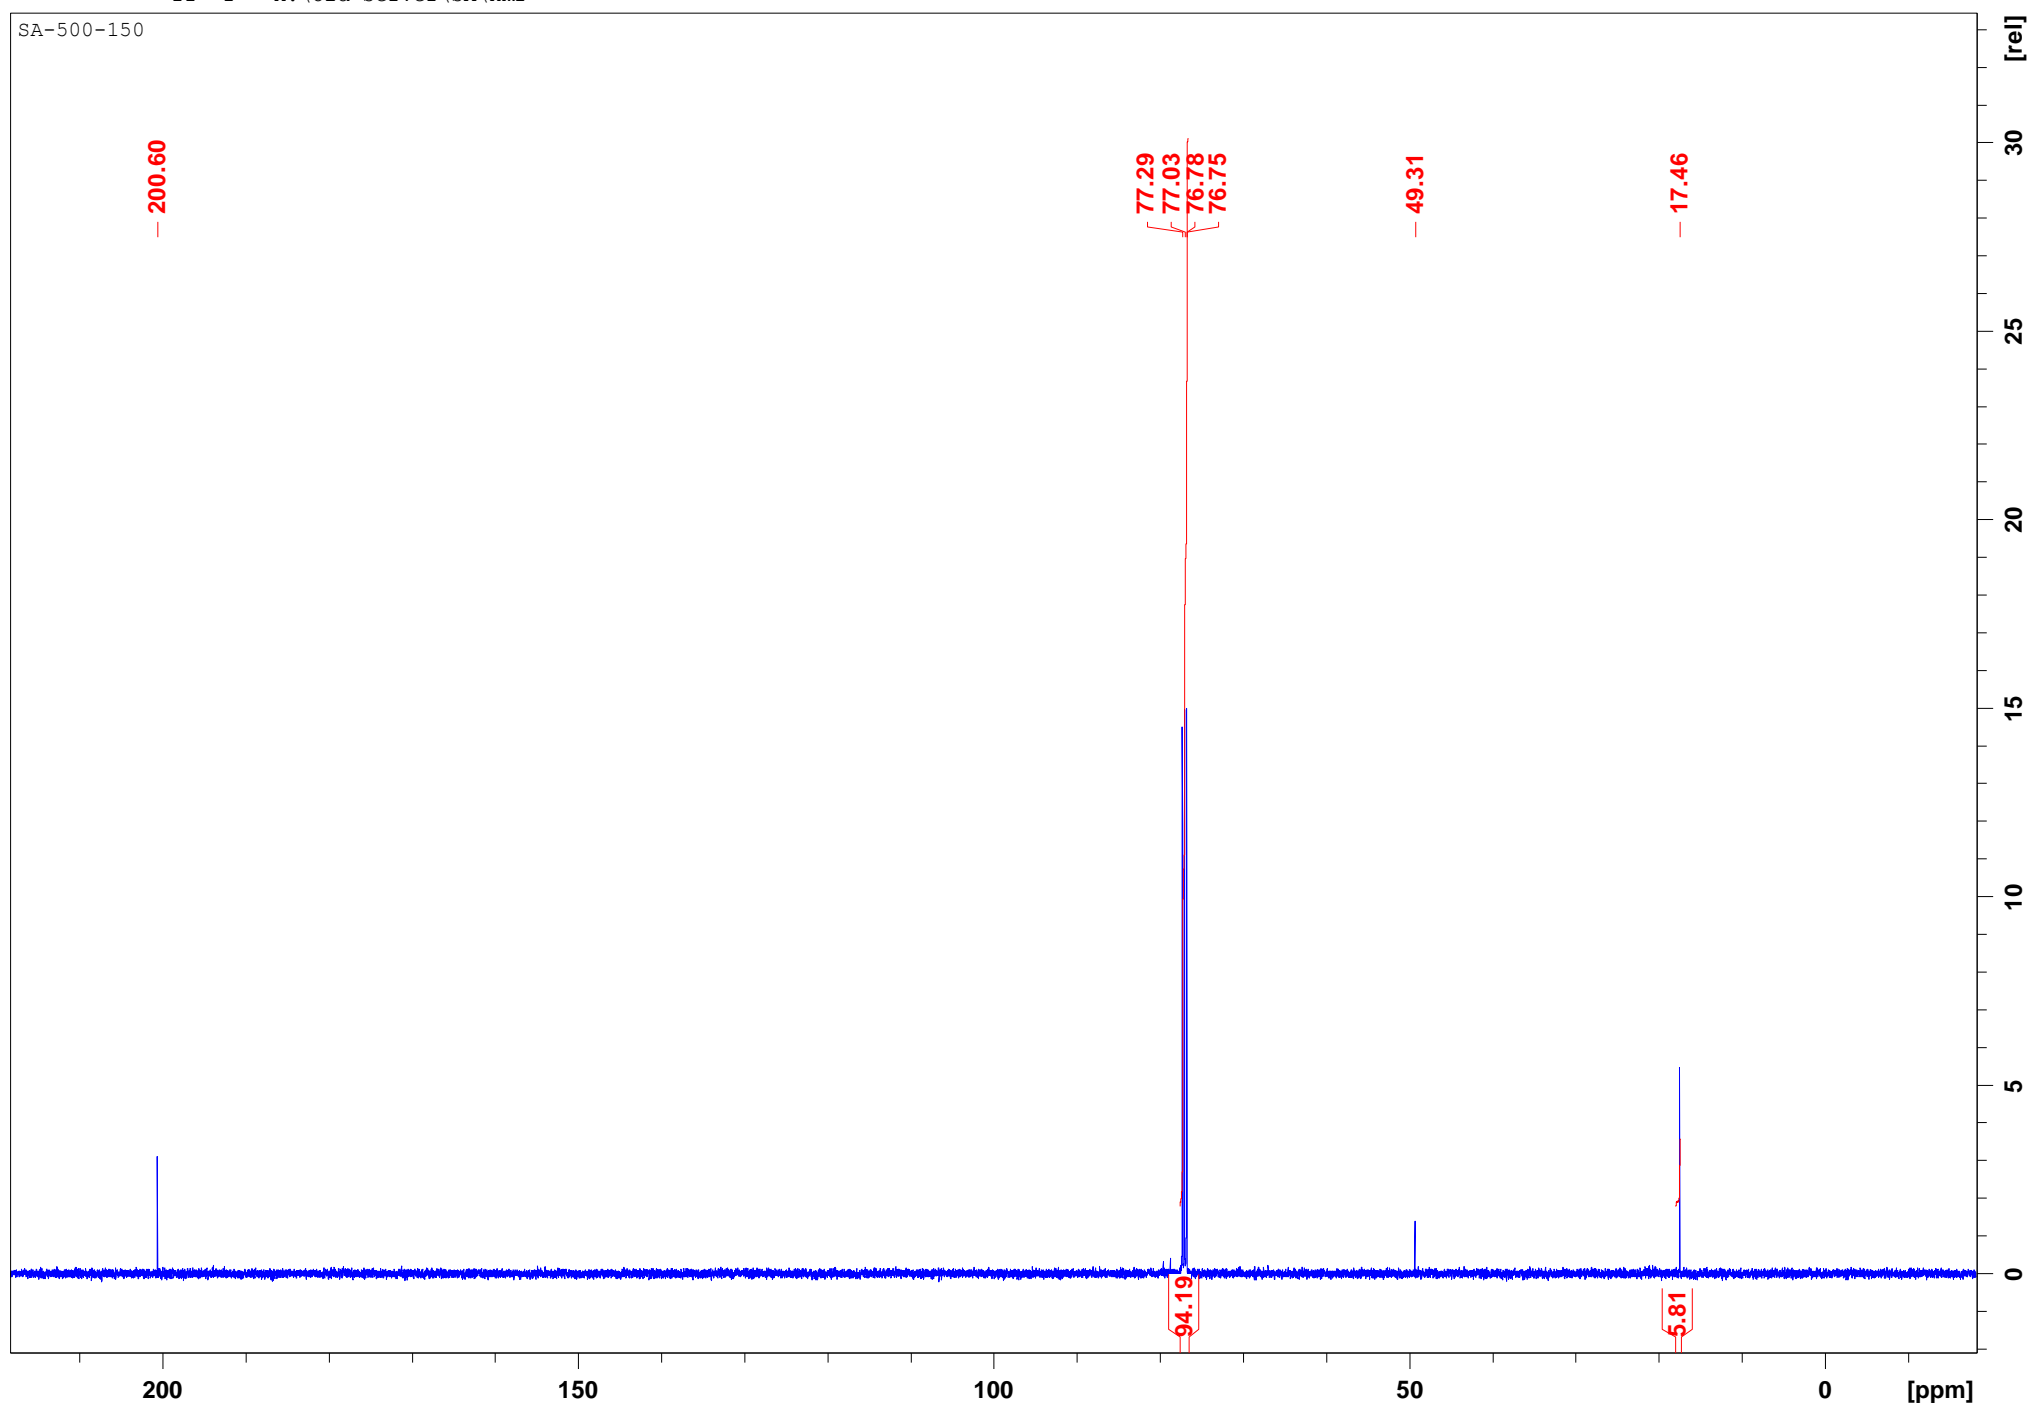

Supplement: OB-016-C8OB00099A-s001.pdf [file OB-016-C8OB00099A-s001.pdf]
